# Supplementary material for: Magic cluster sizes of cationic and anionic sodium chloride clusters explained by statistical modeling of the complete phase space
Source: Phys Chem Chem Phys. 2024 Mar 11;26(14):10904–18. doi: 10.1039/d4cp00357h (PMC10989714; doi:10.1039/d4cp00357h)
Supplement: CP-026-D4CP00357H-s002 [file CP-026-D4CP00357H-s002.xlsx]

## Sheet: Figure 5 Cations
		(NaCl)3Na+						(NaCl)4Na+							(NaCl)5Na+								(NaCl)6Na+									(NaCl)7Na+										(NaCl)8Na+
		SORI Power (%)	(NaCl)Na+	(NaCl)2Na+	(NaCl)3Na+	Noise		SORI Power (%)	(NaCl)Na+	(NaCl)2Na+	(NaCl)3Na+	(NaCl)4Na+	Noise		SORI Power (%)	(NaCl)Na+	(NaCl)2Na+	(NaCl)3Na+	(NaCl)4Na+	(NaCl)5Na+	Noise		SORI Power (%)	(NaCl)Na+	(NaCl)2Na+	(NaCl)3Na+	(NaCl)4Na+	(NaCl)5Na+	(NaCl)6Na+	Noise		SORI Power (%)	(NaCl)Na+	(NaCl)2Na+	(NaCl)3Na+	(NaCl)4Na+	(NaCl)5Na+	(NaCl)6Na+	(NaCl)7Na+	Noise		SORI Power (%)	(NaCl)Na+	(NaCl)2Na+	(NaCl)3Na+	(NaCl)4Na+	(NaCl)5Na+	(NaCl)6Na+	(NaCl)7Na+
		0	0.0232	0.00304	0.97376	0.00206		0	0.00173	0.00113	0.00408	0.99306	0.000714		0	0.01222	0	0.00346	0	0.98433	0.00174		0	0.00161	0.00152	0.00196	0.02217	0.000401379	0.97233	0.00037182		0	0.00719	0.00118	0.0045	0.00149	0.0015	0.00113	0.98303	0.000581		0	0	0	0	0.00159	0	0	0
		0.02	0.0224	0.00388	0.97371	0.00191		0.05	0.00155	0.00137	0.00424	0.99284	0.000691		0.02	0.0112	0	0.00343	0	0.98537	0.00172		0.02	0.000847899	0.00169	0.00187	0.02484	-0.00038321	0.97114	0.000366604		0.02	0.00541	0.000788	0.00454	0.00108	0.00165	0.000674	0.98586	0.000568		0.02	0	0	0	0.00143	0	0	0
		0.04	0.02435	0.00322	0.97243	0.00197		0.1	0.00174	0.00133	0.00528	0.99165	0.000673		0.04	0.01204	0	0.00436	0	0.98361	0.00175		0.04	0.00088373	0.00164	0.00178	0.02529	2.523e-05	0.97039	0.000356617		0.04	0.00532	0.000769	0.00443	0.000869	0.00193	0.00113	0.98555	0.000573		0.04	0	0	0	0.00149	0	0	0
		0.06	0.02419	0.00395	0.97187	0.00201		0.15	0.00245	0.00188	0.00791	0.98777	0.00068		0.06	0.01337	0.00191	0.00526	0.00186	0.9776	0.00178		0.06	-0.000594786	0.00161	0.00211	0.02874	-0.000102052	0.96823	0.000347208		0.06	0.00491	0.000951	0.00446	0.00108	0.00186	0.00103	0.9857	0.000565		0.06	0	0	0	0.00207	0	0	0
		0.08	0.02642	0.00513	0.96844	0.00204		0.2	0.0038	0.00284	0.01143	0.98193	0.00068		0.08	0.01448	0	0.00545	0.00224	0.97783	0.00179		0.08	-0.0013	0.00188	0.0021	0.02989	-0.000115136	0.96753	0.000327316		0.08	0.00579	0.00106	0.00599	0.0014	0.00241	0.00141	0.98194	0.000556		0.08	0	0	0	0.00177	0	0	0
		0.1	0.02847	0.00424	0.96729	0.00209		0.25	0.00596	0.00559	0.01899	0.96946	0.000687		0.1	0.01614	0	0.00521	0.0025	0.97615	0.00177		0.1	-0.000879814	0.00163	0.00205	0.03011	4.92224e-05	0.96704	0.000331405		0.1	0.00595	0.000921	0.00682	0.00189	0.00288	0.00156	0.97999	0.000546		0.1	0	0	0	0.00178	0	0	0
		0.12	0.03061	0.0041	0.96529	0.00203		0.3	0.01043	0.00966	0.0287	0.95122	0.000682		0.12	0.0164	0	0.00642	0.00281	0.97438	0.00162		0.12	-0.000877147	0.00199	0.00254	0.03454	-8.39729e-05	0.96189	0.000355322		0.12	0.00608	0.000927	0.00705	0.00185	0.00267	0.00176	0.97966	0.000561		0.12	0	0	0	0.00153	0	0.00105	0
		0.14	0.03307	0.00534	0.96158	0.00203		0.35	0.0161	0.01519	0.03809	0.93062	0.000689		0.14	0.01842	0	0.00703	0.00273	0.97183	0.00161		0.14	-0.00167	0.00231	0.00285	0.03993	-0.000145325	0.95672	0.000359438		0.14	0.00821	0.00117	0.00857	0.00196	0.0037	0.00169	0.97469	0.000579		0.14	0	0	0	0.00162	0	0.000866	0
		0.16	0.03597	0.00636	0.95767	0.00204		0.4	0.02436	0.02376	0.04801	0.90387	0.000682		0.16	0.01809	0.00197	0.00693	0.00288	0.97013	0.00162		0.16	-0.0012	0.00248	0.00294	0.03879	0.00030987	0.95669	0.000360192		0.16	0.00814	0.000809	0.01011	0.00211	0.00412	0.00199	0.97273	0.000565		0.16	0	0	0	0.00215	0	0.00109	0
		0.18	0.03913	0.00726	0.95361	0.0021		0.45	0.0358	0.03461	0.05814	0.87145	0.000714		0.18	0.01765	0	0.00739	0.00295	0.97201	0.00163		0.18	-0.00157	0.00228	0.00311	0.04113	-7.96581e-05	0.95513	0.000376036		0.18	0.00847	0.000959	0.0112	0.00261	0.00456	0.00267	0.96952	0.000572		0.18	0	0	0	0.00253	0	0.000913	0
		0.2	0.04099	0.00751	0.9515	0.00222		0.5	0.04774	0.04485	0.06475	0.84266	0.000746		0.2	0.0193	0	0.0078	0.00299	0.96991	0.00167		0.2	-0.00158	0.00169	0.00285	0.04123	-0.000600904	0.9564	0.000397479		0.2	0.00823	0.00111	0.01187	0.00273	0.00506	0.00247	0.96853	0.000576		0.2	0	0	0	0.00303	0	0.0014	0
		0.25	0.05287	0.0118	0.93533	0.0022		0.55	0.05904	0.05411	0.06733	0.81952	0.000771		0.22	0.02236	0	0.00948	0.0042	0.96396	0.00168		0.22	-0.0013	0.00178	0.00275	0.04047	0.000105564	0.95619	0.000328356		0.22	0.0111	0.00159	0.01111	0.00282	0.00437	0.00232	0.9667	0.000597		0.22	0	0	0	0.00358	0	0.00164	0
		0.3	0.06575	0.01454	0.91971	0.00229		0.6	0.07094	0.06055	0.06876	0.79975	0.000797		0.24	0.03113	0.00188	0.01253	0.00556	0.9489	0.00182		0.24	-0.00107	0.00214	0.00309	0.04183	-0.000134153	0.95414	0.000348835		0.24	0.00984	0.00108	0.01443	0.00324	0.00633	0.00339	0.96171	0.000606		0.24	0	0	0	0.00294	0	0.00168	0
		0.35	0.07893	0.01921	0.90186	0.00227		0.65	0.08315	0.06756	0.06868	0.7806	0.000813		0.26	0.02664	0	0.0114	0.00551	0.95645	0.00169		0.26	-0.000758188	0.00199	0.00243	0.03719	0.000268104	0.95888	0.000328705		0.26	0.01028	0.00116	0.013	0.00316	0.00522	0.00262	0.96456	0.00066		0.26	0	0	0	0.00528	0	0.0029	0
		0.4	0.08954	0.02334	0.88712	0.00231		0.7	0.08923	0.07015	0.0671	0.77352	0.000836		0.28	0.03097	0	0.01555	0.0066	0.94689	0.00163		0.28	-0.000739037	0.00232	0.00283	0.04125	5.72601e-06	0.95434	0.000342129		0.28	0.01264	0.000949	0.011	0.00161	0.00365	0.00229	0.96785	0.000673		0.28	0	0	0	0.00433	0	0.00271	0
		0.45	0.0997	0.02737	0.87294	0.00246		0.75	0.09531	0.07144	0.06731	0.76594	0.000862		0.3	0.0297	0	0.01432	0.0068	0.94919	0.00162		0.3	-0.00306	0.00268	0.00392	0.05236	0.000109031	0.94399	0.000337948		0.3	0.01305	0.00149	0.01555	0.003	0.00611	0.00344	0.95737	0.00067		0.3	0	0	0	0.00562	0	0.00291	0.000903
		0.5	0.10867	0.03015	0.86118	0.00273		0.8	0.10164	0.07336	0.06503	0.75997	0.00091		0.32	0.03446	0.00225	0.02019	0.00905	0.93405	0.00169		0.32	-0.00394	0.00317	0.00463	0.05989	-5.75827e-05	0.9363	0.000372368		0.32	0.01101	0.00104	0.01415	0.00237	0.0052	0.00299	0.96325	0.00065		0.32	0	0	0	0.00503	0	0.00254	0
		0.55	0.1174	0.03354	0.84906	0.00284		0.85	0.10781	0.07324	0.06293	0.75602	0.000922		0.34	0.03624	0.00235	0.02137	0.00965	0.93039	0.00179		0.34	-0.00608	0.0032	0.00496	0.07416	-0.000242646	0.92401	0.000383096		0.34	0.01258	0.00153	0.02368	0.00556	0.01095	0.00574	0.93995	0.00063		0.34	0	0	0	0.00667	0.000857	0.00367	0
		0.6	0.12551	0.03631	0.83818	0.00285		0.9	0.11393	0.07442	0.06073	0.75093	0.000959		0.36	0.04035	0.00233	0.02502	0.01342	0.91888	0.00171		0.36	-0.00488	0.00404	0.00585	0.07795	-0.000452691	0.91749	0.000372869		0.36	0.01242	0.00188	0.02325	0.00565	0.01008	0.00519	0.94155	0.000621		0.36	0	0	0	0.00666	0	0.00473	0
		0.65	0.1331	0.0381	0.82881	0.00307		0.95	0.11553	0.0734	0.06006	0.75101	0.000992		0.38	0.05075	0.00406	0.03352	0.01689	0.89478	0.00182		0.38	-0.00474	0.00471	0.00617	0.08163	-0.000298671	0.91253	0.000393757		0.38	0.01624	0.00187	0.0321	0.00885	0.01617	0.0083	0.91647	0.000635		0.38	0	0	0	0.00884	0	0.00599	0
		0.7	0.14065	0.03949	0.81986	0.00313		1	0.12313	0.07506	0.05845	0.74335	0.00102		0.4	0.05455	0.00455	0.03656	0.01939	0.88495	0.00179		0.4	-0.00331	0.0054	0.00797	0.08915	-0.000145861	0.90093	0.000375689		0.4	0.01819	0.00218	0.0341	0.01	0.0174	0.00888	0.90926	0.00064		0.4	0	0	0	0.01014	0	0.00775	0
		0.75	0.14675	0.03926	0.81399	0.0033		1.1	0.13684	0.07844	0.05878	0.72594	0.00107		0.42	0.05748	0.00566	0.04397	0.02432	0.86857	0.00191		0.42	-0.00419	0.00533	0.00795	0.09749	-0.000352776	0.89378	0.000389153		0.42	0.02143	0.00261	0.03772	0.01179	0.01943	0.00967	0.89735	0.000676		0.42	0	0	0	0.00966	0	0.00711	0
		0.8	0.15355	0.04182	0.80462	0.00381		1.2	0.14896	0.08365	0.06172	0.70568	0.00117		0.44	0.05956	0.00644	0.04355	0.02386	0.86658	0.00178		0.44	-0.00169	0.00604	0.00883	0.0956	-0.000166868	0.89139	0.000371798		0.44	0.02291	0.00276	0.04235	0.01423	0.02298	0.01115	0.88363	0.000677		0.44	0	0	0	0.01218	0	0.00844	0.000892
		0.85	0.162	0.04252	0.79548	0.00377		1.3	0.16471	0.09015	0.06359	0.68156	0.00123		0.46	0.06285	0.00747	0.04497	0.02512	0.8596	0.00178		0.46	-0.00204	0.00604	0.00917	0.09833	-8.21049e-05	0.88858	0.000371427		0.46	0.02436	0.00302	0.04204	0.01428	0.02265	0.01105	0.8826	0.000674		0.46	0	0	0	0.01255	0	0.00955	0.000978
		0.9	0.17137	0.04203	0.7866	0.00411		1.4	0.18814	0.09735	0.06665	0.64786	0.0014		0.48	0.06882	0.0097	0.05314	0.02815	0.8402	0.00192		0.48	-0.00502	0.0057	0.00887	0.10331	-0.000381197	0.88754	0.000408267		0.48	0.02537	0.00359	0.04887	0.01845	0.02749	0.01382	0.86241	0.000632		0.48	0	0	0	0.01486	0	0.01106	0.00151
		0.95	0.17516	0.04458	0.78025	0.00416		1.5	0.19483	0.09911	0.06721	0.63885	0.00145		0.5	0.06981	0.00971	0.05368	0.03026	0.83654	0.00188		0.5	-0.00356	0.00723	0.01126	0.11499	-0.000885683	0.87096	0.000430604		0.5	0.02773	0.00344	0.04561	0.01762	0.02614	0.01274	0.86673	0.000643		0.5	0	0	0.00197	0.01903	0	0.01567	0.00125
		1	0.18191	0.047	0.77108	0.00427		1.6	0.21467	0.10408	0.06754	0.61371	0.00162		0.52	0.07576	0.0123	0.05912	0.03274	0.82007	0.00198		0.52	-0.00112	0.00968	0.01424	0.13133	-0.000497658	0.84636	0.000435874		0.52	0.02572	0.00293	0.05288	0.01945	0.03119	0.01494	0.85289	0.000643		0.52	0	0	0.00226	0.02199	0	0.0177	0.00162
		1.05	0.18753	0.048	0.76447	0.00472		1.7	0.22046	0.10227	0.06995	0.60733	0.00168		0.54	0.07381	0.01392	0.06103	0.03398	0.81726	0.00193		0.54	-0.000582253	0.01016	0.01506	0.13418	-0.000461561	0.84165	0.000445148		0.54	0.0237	0.00191	0.05228	0.01654	0.03188	0.0155	0.8582	0.000654		0.54	0	0	0.00214	0.02307	0	0.01907	0.00166
		1.1	0.19714	0.05409	0.74877	0.00507		1.8	0.2331	0.10321	0.0686	0.59509	0.00178		0.57	0.08616	0.01986	0.06697	0.03879	0.78822	0.00197		0.56	0.000390627	0.01056	0.01584	0.13549	-0.000889016	0.83862	0.000424256		0.56	0.03011	0.00333	0.05967	0.02359	0.0368	0.01681	0.82969	0.000677		0.56	0.00329	0.00122	0.00201	0.02543	0	0.0219	0.00185
		1.2	0.21685	0.05486	0.72828	0.00559		1.9	0.23196	0.09953	0.06924	0.59927	0.00191		0.6	0.08869	0.02165	0.07049	0.04059	0.77858	0.002		0.58	0.00494	0.01222	0.01787	0.14154	-0.000784408	0.82422	0.000454886		0.58	0.03146	0.00427	0.05952	0.02735	0.03783	0.01666	0.82292	0.000657		0.58	0.00418	0.00143	0.00257	0.03142	0	0.02721	0.0028
		1.3	0.22784	0.05491	0.71725	0.00597		2	0.24872	0.10592	0.07155	0.57381	0.00205		0.65	0.09845	0.02749	0.07506	0.04197	0.75703	0.00209		0.6	0.00811	0.01366	0.01986	0.14218	-0.000784875	0.81698	0.000394766		0.6	0.031	0.00315	0.06104	0.02575	0.04002	0.01858	0.82046	0.00072		0.6	0.00326	0.00145	0.00239	0.03421	0	0.02924	0.00284
		1.4	0.24689	0.05709	0.69602	0.00638		2.1	0.2959	0.11849	0.07817	0.50744	0.00235		0.7	0.11047	0.03489	0.07906	0.04529	0.73028	0.00222		0.63	0.01019	0.01609	0.02161	0.1488	-0.00152	0.80483	0.000414003		0.63	0.04005	0.00733	0.06911	0.03719	0.04355	0.0196	0.78318	0.000662		0.63	0.00361	0.00163	0.0031	0.04105	0	0.03527	0.00344
		1.5	0.25943	0.06172	0.67886	0.0067		2.2	0.32764	0.13073	0.08615	0.45549	0.00275		0.75	0.11766	0.03921	0.08067	0.04359	0.71887	0.00234		0.66	0.0142	0.01752	0.02381	0.15422	-0.000813852	0.79107	0.000414362		0.66	0.04548	0.00874	0.0725	0.04295	0.04474	0.02082	0.76476	0.000673		0.66	0.00631	0.00254	0.00387	0.04871	0.00132	0.04054	0.00446
		1.6	0.27258	0.06101	0.66642	0.00769		2.3	0.32278	0.12565	0.08354	0.46803	0.00346		0.8	0.12571	0.0435	0.08255	0.04566	0.70258	0.00234		0.7	0.02419	0.02314	0.0298	0.16618	-0.00103	0.75772	0.000405912		0.7	0.05115	0.01103	0.07742	0.0489	0.04728	0.02153	0.74269	0.000706		0.7	0.00559	0.00278	0.00514	0.05732	0.00165	0.04786	0.00547
		1.7	0.2743	0.06204	0.66367	0.00772		2.4	0.34737	0.12636	0.08392	0.44236	0.00506		0.85	0.1339	0.05055	0.08309	0.04683	0.68564	0.00238		0.75	0.0302	0.02666	0.03301	0.16729	-0.00146	0.7443	0.000394478		0.75	0.05702	0.01302	0.07885	0.05523	0.0484	0.02217	0.72531	0.00071		0.75	0.00894	0.00414	0.00681	0.06808	0.00232	0.05538	0.00677
		1.8	0.27476	0.05954	0.6657	0.00798		2.5	0.39151	0.12754	0.08721	0.39374	0.00866		0.9	0.13661	0.05595	0.0832	0.04481	0.67942	0.00245		0.8	0.03496	0.02906	0.03566	0.17123	-0.000951889	0.73003	0.000420864		0.8	0.06322	0.01568	0.08215	0.06086	0.05	0.02173	0.70636	0.000767		0.8	0.0164	0.00569	0.00912	0.07585	0.00359	0.06018	0.00727
		1.9	0.25607	0.05204	0.69189	0.0079									0.95	0.147	0.05908	0.08306	0.04453	0.66633	0.00254		0.85	0.03976	0.03047	0.03576	0.16985	-0.000820095	0.72498	0.000429405		0.85	0.06287	0.01649	0.08936	0.06854	0.05206	0.02235	0.68833	0.000727		0.85	0.01369	0.00631	0.01172	0.08842	0.00464	0.06868	0.00864
		2	0.26566	0.04855	0.68579	0.00795									1	0.15118	0.06189	0.08579	0.04407	0.65707	0.00269		0.9	0.04751	0.0344	0.04061	0.1693	-0.00167	0.70985	0.000426263		0.9	0.06885	0.01895	0.0952	0.07511	0.05548	0.02413	0.66229	0.000789		0.9	0.01992	0.00858	0.01353	0.09478	0.006	0.0691	0.00888
		2.2	0.38734	0.0719	0.54076	0.01264									1.05	0.16159	0.06307	0.08519	0.04547	0.64469	0.00276		0.95	0.05925	0.0416	0.0457	0.18465	-0.00177	0.67055	0.000512103		0.95	0.07165	0.02293	0.09803	0.07851	0.05353	0.02193	0.65343	0.000779		0.95	0.01961	0.00995	0.01726	0.10492	0.00724	0.07323	0.00957
		2.4	0.46087	0.06581	0.47332	0.02225									1.1	0.16675	0.06575	0.08532	0.04431	0.63787	0.00293		1	0.06758	0.04511	0.05043	0.18891	0.000613434	0.64736	0.000475159		1	0.08174	0.02741	0.09601	0.0779	0.05024	0.02151	0.64519	0.000814		1	0.02856	0.01191	0.02078	0.11245	0.00878	0.07306	0.01029
		2.5	1	0	0	0.24556									1.2	0.18529	0.06949	0.08601	0.04141	0.61779	0.00316		1.07	0.07806	0.05042	0.05288	0.18614	0.000619627	0.63189	0.000516061		1.07	0.08903	0.03478	0.10315	0.08446	0.0513	0.02173	0.61556	0.00085		1.05	0.03066	0.01457	0.02338	0.118	0.00944	0.07277	0.01021
															1.3	0.19724	0.0715	0.0866	0.04443	0.60023	0.00343		1.14	0.0892	0.05245	0.05059	0.17552	-0.000755548	0.633	0.0005302		1.14	0.09073	0.03621	0.10216	0.08321	0.04808	0.02054	0.61909	0.0008		1.1	0.0363	0.01606	0.0266	0.12263	0.01074	0.07282	0.0105
															1.4	0.21086	0.07666	0.08643	0.04144	0.58461	0.00337		1.2	0.09367	0.05447	0.05312	0.17767	0.00115	0.61992	0.000555512		1.2	0.09337	0.03852	0.10131	0.08339	0.0473	0.02068	0.61542	0.000827		1.15	0.03823	0.01872	0.03066	0.13054	0.01107	0.07553	0.01073
															1.5	0.22494	0.07795	0.08807	0.04572	0.56332	0.00377		1.3	0.10461	0.05764	0.05157	0.17592	0.000375202	0.60989	0.000613484		1.3	0.10907	0.04684	0.10837	0.09088	0.04975	0.02121	0.57388	0.00084		1.2	0.05085	0.02118	0.03339	0.13018	0.01154	0.07414	0.01019
															1.6	0.23727	0.08468	0.09066	0.04419	0.54321	0.00414		1.4	0.10912	0.06037	0.05493	0.17802	0.000927415	0.59664	0.00062134		1.4	0.12385	0.05302	0.10989	0.08901	0.04843	0.02033	0.55548	0.000868		1.27	0.06108	0.02688	0.03776	0.13507	0.01207	0.07135	0.01046
															1.7	0.25225	0.08698	0.09366	0.04246	0.52465	0.00433		1.5	0.12355	0.06589	0.05579	0.17888	0.00141	0.57449	0.000718515		1.5	0.13375	0.05782	0.11342	0.09145	0.0484	0.02082	0.53434	0.00094		1.34	0.05794	0.02792	0.04063	0.13763	0.01239	0.07212	0.01067
															1.8	0.26309	0.09014	0.09597	0.04559	0.50521	0.00465		1.6	0.13468	0.06748	0.05611	0.17694	0.000873562	0.56392	0.000744425		1.6	0.144	0.06395	0.11608	0.09216	0.04692	0.02063	0.51628	0.00102		1.4	0.06465	0.03064	0.04162	0.13874	0.01287	0.06988	0.01016
															1.9	0.27036	0.09319	0.09593	0.04549	0.49503	0.00499		1.7	0.15059	0.07519	0.06069	0.18548	0.00213	0.52593	0.000807769		1.7	0.15454	0.06774	0.11993	0.09489	0.04679	0.02014	0.49597	0.00106		1.5	0.07208	0.0332	0.0444	0.1398	0.01336	0.06977	0.01029
															2	0.29377	0.09349	0.09638	0.04475	0.47161	0.00524		1.8	0.16021	0.076	0.0613	0.17722	0.00116	0.52411	0.000928609		1.8	0.16462	0.07125	0.11881	0.09614	0.04561	0.02002	0.48356	0.00112		1.6	0.07798	0.03823	0.04664	0.14001	0.01261	0.06806	0.00955
															2.2	0.29485	0.08396	0.08585	0.04159	0.49375	0.00554		1.9	0.17297	0.07986	0.06144	0.17931	0.00251	0.50391	0.00091036		1.9	0.18161	0.07457	0.12127	0.09754	0.04759	0.0205	0.45692	0.0012		1.7	0.07693	0.03853	0.0476	0.13687	0.01297	0.0679	0.00951
															2.4	0.33952	0.09369	0.09594	0.04415	0.4267	0.00703		2	0.18746	0.08758	0.06314	0.18772	0.00274	0.47135	0.000999682		2	0.18486	0.07724	0.1182	0.09453	0.0453	0.01956	0.46032	0.00125		1.8	0.08885	0.04308	0.04849	0.13572	0.01251	0.06382	0.00889
															2.6	0.38038	0.0796	0.0845	0.0407	0.41481	0.01977		2.1	0.21623	0.09298	0.06904	0.1863	0.00133	0.43412	0.00119		2.1	0.1992	0.083	0.12273	0.09929	0.04543	0.02036	0.43001	0.00138		1.9	0.08672	0.0446	0.05001	0.13136	0.01204	0.05869	0.00775
															2.8	0.49645	0.09606	0.09732	0	0.31017	0.04099		2.2	0.20161	0.08589	0.06542	0.18549	0.00238	0.45921	0.00142		2.2	0.21513	0.08545	0.12364	0.09717	0.04673	0.02007	0.41181	0.00146		2	0.10345	0.04859	0.05175	0.13163	0.01272	0.05825	0.00808
															3	0.62981	0.11341	0.15569	0.10109	0	0.09911		2.3	0.23497	0.09884	0.07531	0.20846	0.00448	0.37794	0.00251		2.3	0.20798	0.07812	0.11053	0.0843	0.04001	0.01789	0.46118	0.00145		2.1	0.11392	0.05196	0.05553	0.13736	0.01273	0.06208	0.00927
																							2.4	0.23298	0.08646	0.06582	0.18333	0	0.43141	0.00335		2.4	0.2392	0.08679	0.11768	0.09289	0.04345	0.01895	0.40104	0.00161		2.2	0.1277	0.05771	0.06049	0.14856	0.0146	0.06275	0.00915
																							2.5	0.23723	0.07776	0.0606	0.19521	0	0.4292	0.00588		2.5	0.25092	0.08534	0.12137	0.09335	0.04386	0.01911	0.38606	0.00228		2.3	0.15249	0.06742	0.06712	0.15766	0.01563	0.06585	0.01059
																							2.6	0.26215	0.09004	0.07096	0.24795	0	0.32891	0.00978		2.6	0.25844	0.08653	0.11082	0.08604	0.04146	0.01676	0.39996	0.00407		2.4	0.14259	0.06397	0.06288	0.14568	0.01526	0.05846	0.00914
																							2.7	0.43262	0.10008	0.08507	0.38223	0	0	0.02314		2.7	0.30361	0.08617	0.11145	0.07827	0.04314	0.01693	0.36043	0.01011		2.5	0.14852	0.06955	0.06567	0.14617	0.01434	0.06034	0.00821
																							2.8	0.48574	0.10299	0.09268	0.31859	0	0	0.02216		2.8	0.52445	0.14079	0.15674	0.10908	0.06895	0	0	0.0309		2.6	0.1666	0.07128	0.06548	0.14138	0.01406	0.05273	0.00964
																							2.9	0.39268	0.11429	0.08405	0.22389	0	0.18509	0.01082		2.9	0.347	0.09092	0.12206	0.08443	0.04113	0.02397	0.2905	0.0151		2.7	0.32421	0.11978	0.10571	0.19538	0.02345	0.07893	0.01105
																							3	0.50704	0.12517	0.10195	0.26583	0	0	0.01901		3	0.4301	0.10346	0.14573	0.08897	0.05545	0.02818	0.1481	0.02633		2.8	0.31111	0.10562	0.08912	0.15691	0.01548	0.06417	0.01005
																							3.2	0.5046	0.09376	0.0878	0.31384	0	0	0.02041		3.1	0.54894	0.11617	0.18308	0.09825	0.05357	0	0	0.04109		2.9	0.26801	0.08428	0.07324	0.13293	0.01134	0.05377	0
																							3.4	0.50611	0.08947	0.0752	0.32923	0	0	0.026		3.2	0.55384	0.10315	0.17085	0.10547	0.06669	0	0	0.04013		3	0.34641	0.10293	0.09565	0.14192	0.02014	0.06088	0
																																3.3	0.59907	0.11633	0.1403	0.09634	0.04796	0	0	0.03485
																																3.4	0.53303	0.09395	0.13872	0.09602	0.05426	0.029	0.05502	0.02439
																																3.5	0.50067	0.10229	0.13217	0.09126	0.0432	0.02371	0.1067	0.01697
[truncated: 2 more columns]

## Sheet: Figure 6 Anions
		(NaCl)3Cl-						(NaCl)4Cl-							(NaCl)5Cl-								(NaCl)6Cl-									(NaCl)7Cl-										(NaCl)8Cl-
		SORI Power (%)	(NaCl)Cl-	(NaCl)2Cl-	(NaCl)3Cl-	Noise		SORI Power (%)	(NaCl)Cl-	(NaCl)2Cl-	(NaCl)3Cl-	(NaCl)4Cl-	Noise		SORI Power (%)	(NaCl)Cl-	(NaCl)2Cl-	(NaCl)3Cl-	(NaCl)4Cl-	(NaCl)5Cl-	Noise		SORI Power (%)	(NaCl)Cl-	(NaCl)2Cl-	(NaCl)3Cl-	(NaCl)4Cl-	(NaCl)5Cl-	(NaCl)6Cl-	Noise		SORI Power (%)	(NaCl)Cl-	(NaCl)2Cl-	(NaCl)3Cl-	(NaCl)4Cl-	(NaCl)5Cl-	(NaCl)6Cl-	(NaCl)7Cl-	Noise		SORI Power (%)	(NaCl)Cl-	(NaCl)2Cl-	(NaCl)3Cl-	(NaCl)4Cl-	(NaCl)5Cl-	(NaCl)6Cl-	(NaCl)7Cl-
		0	0	0	1	0.0043		0	0	0	0.00163	0.99838	0.000815		0	0	0	0.00144	0.00584	0.99273	0.000907		0	0	0	0	0.03001	0	0.96999	0.00474		0	0	0	0.0064	0.0097	0.01979	0	0.96411	0.00125		0	0	0	0	0.00521	0	0	0
		0.03	0	0	1	0.00419		0.02	0	0	0.0011	0.9989	0.000845		0.02	0	0	0.00161	0.00747	0.99092	0.000896		0.02	0	0	0	0.03109	0	0.96891	0.00486		0.02	0	0	0.00742	0.0093	0.01893	0	0.96436	0.00157		0.02	0	0	0	0.00719	0	0	0
		0.06	0	0	1	0.00407		0.04	0	0.0014	0.00182	0.99678	0.000857		0.04	0	0	0.00124	0.00762	0.99115	0.000939		0.04	0	0	0	0.02778	0	0.97222	0.00483		0.04	0	0	0.0078	0.01042	0.02165	0	0.96013	0.00165		0.04	0	0	0	0.00805	0	0	0
		0.1	0	0	1	0.00403		0.06	0	0.00102	0.00263	0.99635	0.000893		0.06	0	0	0.00178	0.00819	0.99004	0.000935		0.06	0	0	0	0.03956	0	0.96044	0.0046		0.06	0	0	0.00784	0.0128	0.02182	0	0.95754	0.00138		0.06	0	0	0	0.00835	0	0	0
		0.15	0	0	1	0.00399		0.08	0	0.00196	0.00412	0.99392	0.000931		0.08	0	0	0.00175	0.0093	0.98895	0.00094		0.08	0	0	0	0.02549	0	0.97451	0.00496		0.08	0	0	0.00792	0.01334	0.0221	0.00162	0.95502	0.00124		0.08	0	0	0	0.00918	0	0	0
		0.2	0.00777	0	0.99223	0.00411		0.1	0	0.00137	0.00427	0.99436	0.000954		0.1	0	0	0.00135	0.00944	0.98921	0.000921		0.1	0	0	0	0.03286	0	0.96715	0.00489		0.1	0	0	0.00825	0.01426	0.02379	0	0.9537	0.00144		0.1	0	0	0	0.01141	0	0	0
		0.25	0.0168	0	0.9832	0.00415		0.12	0	0	0.00496	0.99504	0.00099		0.12	0	0	0.00192	0.0112	0.98687	0.000931		0.12	0	0	0	0.0357	0	0.9643	0.00472		0.12	0	0	0.0083	0.01424	0.02411	0	0.95335	0.00169		0.12	0	0	0	0.0125	0	0	0
		0.3	0.02872	0.00964	0.96164	0.00423		0.14	0.00117	0.00161	0.00596	0.99127	0.00101		0.14	0	0.00115	0.00263	0.01307	0.98315	0.00113		0.14	0	0	0	0.0364	0	0.9636	0.00477		0.14	0	0	0.00936	0.01623	0.02698	0.00192	0.94551	0.00147		0.14	0	0	0	0.01051	0	0	0
		0.35	0.04394	0.01245	0.9436	0.00459		0.16	0	0.00225	0.007	0.99075	0.000967		0.16	0	0	0.00333	0.0165	0.98017	0.00163		0.16	0	0	0	0.03244	0	0.96757	0.00467		0.16	0	0	0.01137	0.01619	0.02957	0	0.94287	0.00176		0.16	0	0	0	0.01582	0	0	0
		0.4	0.05298	0.02121	0.92581	0.00469		0.18	0	0.00287	0.00761	0.98953	0.00104		0.18	0	0	0.00395	0.01794	0.97811	0.00148		0.18	0	0	0	0.04715	0	0.95285	0.00467		0.18	0	0	0.0097	0.01616	0.02735	0.00177	0.94502	0.00144		0.18	0	0	0	0.01598	0	0	0
		0.45	0.06003	0.028	0.91196	0.00501		0.2	0	0.00257	0.00888	0.98855	0.000975		0.2	0	0	0.0035	0.01917	0.97732	0.00151		0.2	0	0	0	0.04684	0	0.95317	0.00492		0.2	0	0	0.01113	0.01741	0.03064	0	0.94082	0.00165		0.2	0	0	0	0.0171	0	0	0
		0.5	0.07391	0.02887	0.89722	0.00519		0.22	0	0.00392	0.01178	0.9843	0.000988		0.22	0	0	0.00477	0.02165	0.97358	0.00134		0.22	0	0	0	0.05014	0	0.94986	0.00491		0.22	0	0	0.01065	0.01925	0.03036	0.00164	0.93811	0.00139		0.22	0	0	0	0.01939	0	0.00253	0
		0.55	0.08161	0.03384	0.88455	0.0056		0.24	0	0.00468	0.01164	0.98368	0.000999		0.24	0	0	0.00474	0.02329	0.97197	0.00142		0.24	0	0	0	0.05819	0	0.94181	0.00481		0.24	0	0	0.01108	0.01945	0.02938	0.00168	0.93842	0.00137		0.24	0	0	0	0.02127	0	0	0
		0.6	0.0853	0.03652	0.87819	0.00583		0.26	0	0.00447	0.01426	0.98127	0.00103		0.26	0.002	0	0.00621	0.02654	0.96525	0.00141		0.26	0	0	0	0.05275	0	0.94725	0.00505		0.26	0	0	0.01287	0.02156	0.03254	0.00224	0.9308	0.0014		0.26	0	0	0	0.02336	0	0.0027	0
		0.65	0.08761	0.03933	0.87306	0.00649		0.28	0.00122	0.00488	0.01386	0.98003	0.000996		0.28	0	0.0018	0.00578	0.02711	0.96531	0.00134		0.28	0	0	0	0.0565	0	0.9435	0.00486		0.28	0	0.00167	0.01257	0.02102	0.02829	0.00187	0.93458	0.00127		0.28	0	0	0	0.0253	0	0.00363	0
		0.7	0.09327	0.03736	0.86937	0.00675		0.3	0.00105	0.00667	0.01577	0.97652	0.00102		0.3	0	0	0.00651	0.03246	0.96104	0.00146		0.3	0.00647	0.00524	0.00572	0.06451	0	0.91806	0.005		0.3	0	0.00149	0.01236	0.02214	0.02957	0.00184	0.93259	0.00122		0.3	0	0	0	0.02784	0	0.00387	0
		0.75	0.09607	0.03943	0.8645	0.00709		0.32	0.00104	0.00644	0.01738	0.97515	0.00103		0.32	0.00173	0.00169	0.0075	0.03517	0.95391	0.00139		0.33	0	0	0	0.06665	0	0.93335	0.00488		0.33	0.00148	0.00189	0.01351	0.024	0.03312	0.00208	0.92392	0.00131		0.32	0	0	0	0.03238	0	0.00468	0.00305
		0.8	0.10395	0.04525	0.8508	0.00743		0.34	0.00103	0.00846	0.01781	0.97269	0.000989		0.34	0	0.00204	0.00876	0.03808	0.95112	0.00149		0.36	0.00586	0	0.00615	0.07847	0	0.90952	0.00503		0.36	0.00155	0.00172	0.01428	0.02622	0.03447	0.00174	0.92002	0.00129		0.34	0	0	0	0.03118	0	0.00453	0
		0.85	0.11326	0.04178	0.84496	0.00772		0.36	0.00108	0.00972	0.01956	0.96964	0.00107		0.36	0	0	0.01016	0.04149	0.94836	0.00135		0.39	0	0	0.00542	0.08649	0	0.90809	0.00511		0.39	0.00163	0.00171	0.01546	0.02791	0.03659	0.00259	0.91412	0.0013		0.36	0	0	0	0.0381	0	0.00606	0.00312
		0.9	0.11849	0.03924	0.84227	0.00817		0.38	0.00125	0.0095	0.02195	0.9673	0.00109		0.38	0.00219	0.00262	0.01197	0.04623	0.93699	0.00136		0.42	0	0	0.00755	0.0886	0	0.90385	0.00513		0.42	0	0.00254	0.01695	0.03043	0.0385	0.00239	0.90919	0.00131		0.38	0	0	0.0028	0.03585	0	0.00537	0.00369
		0.95	0.11749	0.04429	0.83822	0.00856		0.4	0	0.01184	0.02199	0.96618	0.00107		0.4	0	0.0019	0.0109	0.04572	0.94148	0.00139		0.45	0	0	0.00809	0.10811	0	0.8838	0.00507		0.45	0.00146	0.00263	0.01737	0.03152	0.04324	0.00265	0.90113	0.00137		0.4	0	0	0	0.0433	0	0.00661	0.00363
		1	0.11964	0.04074	0.83962	0.00913		0.42	0.00141	0.01089	0.02354	0.96416	0.00111		0.43	0	0.00208	0.01393	0.05119	0.93281	0.00132		0.48	0	0.00567	0.00935	0.10396	0.00537	0.87565	0.00528		0.48	0.00222	0.003	0.01841	0.03421	0.04431	0.00269	0.89517	0.00138		0.42	0	0	0	0.04606	0	0.00762	0.00275
		1.05	0.13123	0.05034	0.81844	0.0097		0.44	0.00117	0.01435	0.02632	0.95817	0.00111		0.46	0.00274	0.00303	0.01485	0.05353	0.92586	0.0014		0.51	0	0	0.00906	0.11316	0	0.87778	0.00526		0.51	0.00159	0.00314	0.02148	0.0378	0.05034	0.00276	0.8829	0.00147		0.44	0.00359	0	0.00299	0.04927	0	0.00729	0.00365
		1.1	0.12574	0.04431	0.82995	0.01041		0.46	0.00239	0.01425	0.0266	0.95676	0.00111		0.49	0.00281	0.0036	0.0163	0.05623	0.92106	0.0014		0.54	0	0	0.01098	0.1183	0	0.87072	0.00538		0.54	0	0.0037	0.0213	0.0423	0.0543	0.00402	0.87438	0.00157		0.46	0	0	0.00333	0.05315	0	0.00771	0.00341
		1.15	0.13442	0.05107	0.81452	0.01076		0.48	0.00241	0.01591	0.02765	0.95403	0.00113		0.52	0	0.00327	0.01491	0.05873	0.92309	0.00139		0.57	0	0.00543	0.01268	0.12982	0.0058	0.84628	0.00535		0.57	0.00176	0.0037	0.02258	0.04128	0.05253	0.00384	0.87431	0.00141		0.48	0	0	0	0.05465	0.00332	0.00804	0.00582
		1.2	0.13996	0.0521	0.80794	0.01124		0.5	0.00126	0.01657	0.02805	0.95412	0.00114		0.55	0.00287	0.00369	0.0177	0.0603	0.91545	0.00147		0.6	0	0.00594	0.01471	0.13269	0.00614	0.84053	0.00538		0.6	0.00264	0.00367	0.02455	0.0461	0.05854	0.00343	0.86108	0.00151		0.5	0	0	0	0.05963	0.00499	0.00934	0.00618
		1.25	0.14508	0.05302	0.8019	0.012		0.52	0.00253	0.01652	0.02867	0.95228	0.00113		0.58	0	0.00437	0.01828	0.06163	0.91572	0.00139		0.63	0	0	0.01469	0.14019	0.00644	0.83868	0.00585		0.63	0.00238	0.0039	0.02553	0.04665	0.05816	0.00386	0.85952	0.00145		0.53	0	0	0.0036	0.06347	0.00638	0.0098	0.00464
		1.3	0.14895	0.05141	0.79964	0.01209		0.54	0.00338	0.01924	0.03157	0.94581	0.00114		0.61	0	0.00415	0.01965	0.0659	0.9103	0.00173		0.66	0	0.00797	0.01676	0.14554	0	0.82972	0.00573		0.66	0.00287	0.00623	0.02613	0.05047	0.06107	0.00418	0.84905	0.00152		0.56	0	0	0.00321	0.06711	0.00594	0.01322	0.00683
		1.37	0.15456	0.05424	0.7912	0.01345		0.56	0.00245	0.01892	0.03102	0.94761	0.00117		0.64	0	0.00551	0.01949	0.06698	0.90803	0.00127		0.69	0	0.00818	0.01583	0.15267	0	0.82332	0.0058		0.69	0.00306	0.00556	0.02878	0.05444	0.06352	0.00473	0.83992	0.00163		0.59	0	0	0.00355	0.07144	0.00619	0.01379	0.00788
		1.44	0.164	0.05191	0.7841	0.01357		0.58	0.00229	0.01949	0.03001	0.94822	0.00119		0.67	0	0.006	0.02127	0.07464	0.89809	0.00111		0.72	0.00661	0.00959	0.01769	0.15594	0.00638	0.80379	0.0061		0.72	0.00305	0.00475	0.03072	0.05686	0.06779	0.00438	0.83245	0.00159		0.62	0	0	0.00419	0.07679	0.00713	0.01546	0.00927
		1.5	0.16623	0.06156	0.77221	0.01464		0.6	0.00226	0.02052	0.03097	0.94625	0.00126		0.7	0.00234	0.00609	0.02154	0.0721	0.89793	0.0012		0.75	0.01324	0.00967	0.02015	0.15875	0.00605	0.79215	0.00595		0.75	0.00308	0.00639	0.03076	0.06308	0.06747	0.00411	0.82512	0.00167		0.65	0	0	0.00476	0.08173	0.00799	0.01587	0.00771
		1.6	0.18959	0.05868	0.75173	0.01486		0.62	0.00303	0.0212	0.0322	0.94357	0.00129		0.73	0.00182	0.00706	0.02078	0.07218	0.89817	0.00117		0.78	0.00636	0.01362	0.02241	0.17057	0.01041	0.77663	0.00596		0.8	0.00383	0.00665	0.03185	0.06599	0.07171	0.00466	0.81532	0.00179		0.68	0	0	0.0037	0.09194	0.00994	0.01851	0.00786
		1.7	0.19203	0.05433	0.75364	0.01695		0.64	0.00299	0.02122	0.03427	0.94153	0.0013		0.76	0	0.00776	0.02388	0.07378	0.89458	0.00131		0.81	0	0.01102	0.02596	0.16868	0.008	0.78634	0.00637		0.85	0.0045	0.00812	0.03376	0.0684	0.07468	0.00539	0.80516	0.0018		0.71	0	0	0.00554	0.09523	0.01155	0.01806	0.01046
		1.8	0.18689	0.05747	0.75564	0.01796		0.66	0.00424	0.02432	0.03313	0.93832	0.00138		0.79	0.00287	0.00672	0.02354	0.0735	0.89337	0.00125		0.84	0.00669	0.0127	0.02491	0.17465	0.00901	0.77205	0.00626		0.9	0.00482	0.00817	0.03428	0.07418	0.07474	0.00552	0.7983	0.00185		0.74	0	0	0.0053	0.09779	0.01235	0.02008	0.00999
		1.9	0.19957	0.06727	0.73317	0.01972		0.68	0.00298	0.02455	0.03566	0.93682	0.00137		0.82	0	0.00769	0.02403	0.07256	0.89573	0.00123		0.87	0	0.01555	0.02548	0.17642	0.00921	0.77334	0.00662		0.95	0.00438	0.0092	0.03601	0.07279	0.07744	0.00461	0.79556	0.00182		0.77	0	0	0.00627	0.10598	0.0141	0.01882	0.01136
		2	0.21505	0.06574	0.71921	0.02045		0.7	0.00493	0.02494	0.03414	0.93599	0.00124		0.85	0.00444	0.00803	0.02409	0.07589	0.88755	0.00129		0.9	0.00955	0.01654	0.02539	0.18512	0.00852	0.75488	0.00688		1	0.00537	0.01	0.03868	0.07765	0.07991	0.00546	0.78293	0.00189		0.8	0	0.00424	0.00765	0.10642	0.01405	0.01956	0.01051
		2.1	0.21903	0.06675	0.71423	0.02228		0.73	0.00479	0.02755	0.03679	0.93087	0.00142		0.88	0	0.00977	0.02509	0.08005	0.88509	0.00127		0.95	0.01243	0.01531	0.03009	0.17994	0.00791	0.75432	0.00695		1.05	0.00665	0.01135	0.03814	0.08342	0.08185	0.00662	0.77198	0.00187		0.83	0	0.00356	0.0079	0.10379	0.01337	0.02004	0.01016
		2.2	0.24587	0.0719	0.68223	0.02441		0.76	0.00439	0.02869	0.04118	0.92574	0.00153		0.91	0.00337	0.00992	0.02631	0.08122	0.87918	0.00126		1	0.00841	0.02131	0.0306	0.19058	0.00821	0.7409	0.00752		1.1	0.00565	0.01253	0.04118	0.08443	0.08326	0.00533	0.76763	0.00193		0.86	0	0.0051	0.00825	0.11276	0.01576	0.01877	0.01088
		2.3	0.27091	0.07453	0.65456	0.02523		0.8	0.0049	0.02947	0.03686	0.92876	0.00155		0.94	0	0.00952	0.02609	0.07993	0.88446	0.00124		1.05	0	0.01913	0.03177	0.20561	0.00899	0.7345	0.00756		1.15	0.0068	0.01193	0.04355	0.08818	0.08647	0.00585	0.75723	0.00202		0.89	0	0.00552	0.00952	0.11869	0.01988	0.02003	0.01193
		2.4	0.25474	0.05676	0.6885	0.02841		0.85	0.00591	0.03186	0.03862	0.92361	0.00164		0.97	0.00467	0.01133	0.02597	0.07794	0.88009	0.00128		1.1	0.00963	0.02007	0.03095	0.19319	0.01143	0.73473	0.00785		1.2	0.0069	0.01323	0.04216	0.09125	0.08495	0.00598	0.75554	0.002		0.92	0	0.00589	0.00759	0.12049	0.0185	0.01911	0.01078
		2.5	0.30011	0.08487	0.61503	0.03623		0.9	0.00704	0.03335	0.04072	0.91888	0.00158		1	0	0.01123	0.0256	0.07933	0.88384	0.00137		1.15	0	0.02098	0.0342	0.19761	0	0.74722	0.00836		1.25	0.00878	0.01375	0.04354	0.09226	0.08542	0.00552	0.75074	0.00206		0.95	0	0.00534	0.01074	0.115	0.02173	0.02442	0.01112
								0.95	0.00662	0.03407	0.0372	0.92211	0.00165		1.05	0.00571	0.01113	0.0259	0.07831	0.87896	0.00128		1.2	0.01	0.02338	0.03726	0.19496	0.00865	0.72575	0.00834		1.3	0.00841	0.016	0.04481	0.09651	0.08767	0.00664	0.73996	0.00223		1	0	0.00683	0.01182	0.12241	0.01829	0.02159	0.01163
								1	0.00547	0.03474	0.04156	0.91823	0.00189		1.1	0.00171	0.01144	0.02555	0.08192	0.87939	0.00137		1.26	0.01278	0.02524	0.04068	0.20106	0.01174	0.70849	0.00889		1.36	0.01001	0.01815	0.04736	0.10055	0.08611	0.00549	0.73234	0.00266		1.05	0	0.00568	0.01011	0.12903	0.02353	0.02347	0.01277
								1.05	0.00773	0.03979	0.04211	0.91038	0.00208		1.15	0.00713	0.01148	0.02688	0.07869	0.87582	0.0018		1.33	0.01864	0.0263	0.03789	0.19238	0.00976	0.71503	0.00928		1.43	0.00901	0.01833	0.04928	0.10607	0.0851	0.00712	0.72509	0.00266		1.1	0	0.00649	0.01349	0.13117	0.02321	0.02063	0.01191
								1.1	0.01119	0.04193	0.04678	0.90011	0.00219		1.2	0	0.01337	0.02952	0.08304	0.87407	0.00185		1.4	0.01585	0.03271	0.03673	0.20616	0	0.70856	0.01003		1.5	0.0116	0.02078	0.04806	0.10571	0.08776	0.0069	0.7192	0.00285		1.15	0	0.00964	0.01301	0.13515	0.02259	0.02139	0.01073
								1.15	0.01034	0.04155	0.04837	0.89974	0.00219		1.25	0.00542	0.0172	0.03123	0.08108	0.86508	0.00204		1.5	0.03079	0.03413	0.04079	0.1979	0.01307	0.68333	0.01043		1.6	0.0106	0.02199	0.05082	0.10809	0.09096	0.00654	0.711	0.00289		1.2	0	0.01049	0.01363	0.1372	0.02414	0.02078	0.01214
								1.2	0.00803	0.0379	0.04222	0.91185	0.00238		1.3	0.00195	0.01401	0.02765	0.08238	0.87402	0.00185		1.6	0.01857	0.03722	0.04128	0.2172	0	0.68573	0.01201		1.7	0.01417	0.02349	0.05532	0.11174	0.08717	0.00665	0.70146	0.00306		1.25	0	0.00919	0.01881	0.14326	0.02354	0.02399	0.0131
								1.25	0.00686	0.03657	0.04161	0.91495	0.00265		1.36	0.0094	0.01554	0.02977	0.07732	0.86797	0.002		1.7	0.01934	0.03682	0.04353	0.20976	0	0.69055	0.01353		1.8	0.01412	0.02726	0.05768	0.12188	0.09122	0.00577	0.68208	0.00348		1.3	0	0.00755	0.01531	0.13921	0.02326	0.02326	0.01275
								1.3	0.00785	0.03961	0.0419	0.91063	0.00251		1.43	0.00631	0.01596	0.03058	0.08096	0.86619	0.00218		1.8	0.01554	0.03706	0.04146	0.20754	0.01394	0.68447	0.0137		1.9	0.01698	0.03184	0.05624	0.12049	0.09244	0.00745	0.67456	0.00393		1.36	0.00588	0.01052	0.02001	0.14084	0.02784	0.02126	0.01482
								1.4	0.00823	0.03933	0.04523	0.9072	0.00293		1.5	0.00324	0.01835	0.03212	0.08582	0.86046	0.00222		1.9	0.01964	0.03448	0.04056	0.20669	0	0.69863	0.01542		2	0.01788	0.03323	0.06153	0.12777	0.09124	0.00781	0.66055	0.00394		1.43	0	0.01298	0.01856	0.14304	0.02219	0.01941	0.01045
								1.5	0.01195	0.04077	0.04754	0.89974	0.00312		1.6	0.00533	0.02002	0.03422	0.08597	0.85445	0.0025		2	0.02049	0.03353	0.03495	0.20107	0	0.70997	0.01646		2.1	0.01934	0.03365	0.06438	0.13922	0.08809	0.00689	0.64845	0.00461		1.5	0	0.0133	0.01774	0.14967	0.02406	0.0201	0.01169
								1.6	0.01086	0.04638	0.05293	0.88984	0.00385		1.7	0.00299	0.01892	0.03298	0.08532	0.85979	0.00237		2.1	0.02413	0.04395	0.04672	0.19815	0	0.68706	0.01672		2.2	0.02105	0.03696	0.06585	0.13561	0.09599	0.00841	0.63614	0.00436		1.6	0	0.01693	0.01962	0.15095	0.02096	0.02191	0.01168
								1.7	0.01256	0.04764	0.06003	0.87976	0.0042		1.8	0	0.01832	0.0336	0.0888	0.85929	0.00255		2.2	0.02424	0.04169	0.04733	0.20132	0	0.68542	0.01805		2.3	0.0254	0.04018	0.07053	0.14266	0.0933	0.00937	0.61855	0.00537		1.7	0	0.01582	0.02064	0.15999	0.02668	0.01829	0.01014
								1.8	0.0132	0.05184	0.05993	0.87503	0.00428		1.9	0.00869	0.01749	0.03073	0.07717	0.86592	0.00261		2.3	0.02571	0.04696	0.05525	0.20981	0	0.66226	0.0211		2.4	0.02421	0.04385	0.072	0.14466	0.09977	0.01091	0.60461	0.00557		1.8	0	0.01394	0.02304	0.15814	0.02589	0.02242	0.01276
								1.9	0.01588	0.06279	0.06199	0.85935	0.00512		2	0.01158	0.01913	0.0336	0.08013	0.85556	0.00254		2.4	0.02814	0.04933	0.04643	0.21677	0.02191	0.63743	0.02173		2.5	0.02688	0.04351	0.07623	0.15343	0.10452	0	0.59544	0.00615		1.9	0	0.01953	0.02717	0.15583	0.02754	0.02068	0.01112
								2	0.01738	0.06158	0.07382	0.84722	0.00603		2.1	0	0.01678	0.0307	0.0777	0.87482	0.00291		2.5	0.03606	0.05074	0.04837	0.23753	0	0.6273	0.02475		2.6	0.03093	0.0496	0.07693	0.14975	0.10153	0.01071	0.58055	0.00643		2	0	0.01705	0.02709	0.15297	0.02614	0.02109	0.01286
								2.1	0.01573	0.0532	0.0763	0.85478	0.00652		2.25	0	0.01363	0.02855	0.07009	0.88772	0.00312											2.7	0.03228	0.04797	0.07977	0.15707	0.10374	0.00947	0.5697	0.00686		2.1	0	0.02326	0.02319	0.15504	0.02388	0.02336	0.0114
								2.2	0.01605	0.05149	0.06291	0.86956	0.00631		2.4	0	0.01589	0.02709	0.07115	0.88586	0.00312											2.8	0.03417	0.04967	0.08382	0.15828	0.101	0.01426	0.5588	0.00716		2.2	0	0.01991	0.02508	0.1671	0.03016	0.02462	0.01373
								2.3	0.02466	0.07159	0.08944	0.81432	0.0104		2.55	0	0.02083	0.04375	0.09911	0.83631	0.0065											2.9	0.03285	0.05162	0.0787	0.15018	0.09955	0.00943	0.57766	0.00695		2.3	0	0.02619	0.02631	0.17623	0.02355	0.02267	0
								2.4	0.02815	0.08089	0.09309	0.79787	0.0117		2.7	0.01175	0.03538	0.05614	0.11386	0.78288	0.00775											3	0.02791	0.04531	0.07363	0.13662	0.09737	0.00983	0.60933	0.00714		2.4	0	0.01675	0.0363	0.17723	0.03246	0.01619	0
								2.5	0.03798	0.08094	0.09571	0.78537	0.01482		2.85	0.0334	0.03967	0.05655	0.1306	0.73978	0.00816																					2.5	0	0.027	0.0288	0.18858	0.03306	0.01795	0
								2.6	0.02729	0.08215	0.0939	0.79666	0.01562		3	0	0.03819	0.06515	0.14634	0.75034	0.01349																					2.6	0	0.02378	0.01904	0.18456	0.03224	0.02159	0
								2.7	0	0.09493	0.09285	0.81222	0.03001																													2.7	0	0.02344	0.04153	0.1792	0.02702	0.02643	0
								2.8	0	0.10908	0.10604	0.78488	0.07198																													2.8	0	0.03157	0.04612	0.20295	0.02498	0.02777	0
																																										2.9	0	0.03162	0.02879	0.2107	0.0496	0	0
																																										3	0	0.04129	0	0.21292	0.05144	0	0
[truncated: 2 more columns]
