# Supplementary material for: Magic cluster sizes of cationic and anionic sodium chloride clusters explained by statistical modeling of the complete phase space
Source: Phys Chem Chem Phys. 2024 Mar 11;26(14):10904–18. doi: 10.1039/d4cp00357h (PMC10989714; doi:10.1039/d4cp00357h)
Supplement: CP-026-D4CP00357H-s003 [file CP-026-D4CP00357H-s003.xlsx]

## Sheet: Figure 4 Dissociation Energies
		Cations										Anions										Neutrals
		x	n=1	n=2	n=3	n=4	n=5	n=6	n=7	n=8		x	n=1	n=2	n=3	n=4	n=5	n=6	n=7	n=8		x	n=1	n=2	n=3	n=4	n=5	n=6	n=7	n=8
		1	1.98492									1	2.18035									2	2.04414
		2	1.64385	1.58463								2	1.58159	1.7178								3	1.67177	1.67177
		3	2.2053	1.80501	2.11816							3	2.23515	1.7726	2.28118							4	2.41182	2.03944	2.41182
		4	1.92487	2.08603	2.05811	1.63121						4	2.11202	2.30303	2.21286	1.98139						5	1.40809	1.77577	1.77577	1.40809
		5	1.94947	1.8302	2.36373	1.59576	2.17259					5	1.78924	1.85713	2.42051	1.59029	2.36254					6	2.43892	1.80287	2.54292	1.80287	2.43892
		6	2.21787	2.1232	2.3763	2.16978	2.40554	1.95154				6	1.93533	1.68043	2.12069	1.94402	2.11752	1.85895				7	1.50079	1.89557	1.6319	1.6319	1.89557	1.50079
		7	1.91696	2.09069	2.36839	1.88144	2.67865	1.88358	2.3677			7	2.1198	2.01099	2.12847	1.82868	2.65573	1.7984	2.47796			8	2.39363	1.85029	2.61744	1.61372	2.61744	1.85029	2.39363
		8	1.92794	1.80076	2.34686	1.88451	2.40129	2.16767	2.31072	1.90201		8	2.20728	2.28295	2.54651	1.92394	2.62787	2.42409	2.5049	2.29161

## Sheet: Figure 7 DOS
		CCSD(T)/TZ//B3LYP-D3																						CCSD(T)/TZ//wB97XD
		DOS x = 3						DOS x = 4											E(25%)					DOS x = 3						DOS x = 4											E(25%)
		E (eV)	C3a	C3b	C3c	C3d		E (eV)	C4a	C4b	C4c	C4d	C4e	C4f	C4g	C4h	C4i		x	Cations	Anions			E (eV)	C3a	C3b	C3c	C3d		E (eV)	C4a	C4b	C4c	C4d	C4e	C4f	C4g	C4h	C4i		x	Cations	Anions
		0.0124	1	0	0	0		0.0124	1	0	0	0	0	0	0	0	0		2	0.06				0.0124	1	0	0	0		0.0124	1	0	0	0	0	0	0	0	0		2	0.04
		0.0248	1	0	0	0		0.0248	1	0	0	0	0	0	0	0	0		3	1.15	1.34			0.0248	1	0	0	0		0.0248	1	0	0	0	0	0	0	0	0		3	1.18	1.25
		0.0372	1	0	0	0		0.0372	1	0	0	0	0	0	0	0	0		4	2.8	1.6			0.0372	1	0	0	0		0.0372	1	0	0	0	0	0	0	0	0		4	2.31	2.45
		0.04959	1	0	0	0		0.04959	1	0	0	0	0	0	0	0	0		5	1.34	0.38			0.04959	1	0	0	0		0.04959	1	0	0	0	0	0	0	0	0		5	0.76	0.32
		0.06199	1	0	0	0		0.06199	1	0	0	0	0	0	0	0	0		6	1	0.93			0.06199	1	0	0	0		0.06199	1	0	0	0	0	0	0	0	0		6	0.51	0.93
		0.07439	1	0	0	0		0.07439	1	0	0	0	0	0	0	0	0							0.07439	1	0	0	0		0.07439	1	0	0	0	0	0	0	0	0
		0.08679	1	0	0	0		0.08679	1	0	0	0	0	0	0	0	0							0.08679	1	0	0	0		0.08679	1	0	0	0	0	0	0	0	0
		0.09919	1	0	0	0		0.09919	1	0	0	0	0	0	0	0	0							0.09919	1	0	0	0		0.09919	1	0	0	0	0	0	0	0	0
		0.11159	1	0	0	0		0.11159	1	0	0	0	0	0	0	0	0							0.11159	1	0	0	0		0.11159	1	0	0	0	0	0	0	0	0
		0.12398	1	0	0	0		0.12398	1	0	0	0	0	0	0	0	0							0.12398	1	0	0	0		0.12398	1	0	0	0	0	0	0	0	0
		0.13638	1	0	0	0		0.13638	1	0	0	0	0	0	0	0	0							0.13638	1	0	0	0		0.13638	1	0	0	0	0	0	0	0	0
		0.14878	1	0	0	0		0.14878	1	0	0	0	0	0	0	0	0							0.14878	1	0	0	0		0.14878	1	0	0	0	0	0	0	0	0
		0.16118	1	0	0	0		0.16118	1	0	0	0	0	0	0	0	0							0.16118	1	0	0	0		0.16118	1	0	0	0	0	0	0	0	0
		0.17358	1	0	0	0		0.17358	1	0	0	0	0	0	0	0	0							0.17358	1	0	0	0		0.17358	1	0	0	0	0	0	0	0	0
		0.18598	1	0	0	0		0.18598	1	0	0	0	0	0	0	0	0							0.18598	1	0	0	0		0.18598	1	0	0	0	0	0	0	0	0
		0.19837	1	0	0	0		0.19837	1	0	0	0	0	0	0	0	0							0.19837	1	0	0	0		0.19837	1	0	0	0	0	0	0	0	0
		0.21077	1	0	0	0		0.21077	1	0	0	0	0	0	0	0	0							0.21077	1	0	0	0		0.21077	1	0	0	0	0	0	0	0	0
		0.22317	1	0	0	0		0.22317	1	2.92248e-11	0	0	0	0	0	0	0							0.22317	1	0	0	0		0.22317	1	0	0	0	0	0	0	0	0
		0.23557	1	0	0	0		0.23557	1	1.47645e-10	0	0	0	0	0	0	0							0.23557	1	0	0	0		0.23557	1	1.2941e-10	0	0	0	0	0	0	0
		0.24797	1	0	0	0		0.24797	1	7.94055e-10	0	0	0	0	0	0	0							0.24797	1	0	0	0		0.24797	1	5.48733e-10	2.62333e-11	0	0	0	0	0	0
		0.26037	1	0	0	0		0.26037	1	2.68755e-09	1.16997e-11	0	0	0	0	0	0							0.26037	1	0	0	0		0.26037	1	2.13911e-09	2.95514e-10	0	0	0	0	0	0
		0.27277	1	0	0	0		0.27277	1	7.32654e-09	4.59618e-11	0	0	0	0	0	0							0.27277	1	0	0	0		0.27277	1	5.55954e-09	1.48541e-09	0	0	0	0	0	0
		0.28516	1	0	0	0		0.28516	1	1.71319e-08	1.71334e-10	0	0	0	0	0	0							0.28516	1	0	0	0		0.28516	1	1.30735e-08	4.53725e-09	0	0	0	0	0	0
		0.29756	1	0	0	0		0.29756	1	3.56754e-08	5.38543e-10	0	0	0	0	0	0							0.29756	1	0	0	0		0.29756	1	2.73013e-08	1.28104e-08	0	0	0	0	0	0
		0.30996	1	0	0	0		0.30996	1	6.82655e-08	1.37341e-09	0	0	0	0	0	0							0.30996	1	0	0	0		0.30996	1	5.20705e-08	3.01234e-08	0	0	0	0	0	0
		0.32236	1	0	0	0		0.32236	1	1.21904e-07	3.08075e-09	0	0	0	0	0	0							0.32236	1	0	0	0		0.32236	1	9.27551e-08	6.38886e-08	0	0	0	0	0	0
		0.33476	1	0	0	0		0.33476	1	2.05699e-07	6.22771e-09	0	0	0	0	0	0							0.33476	1	0	0	0		0.33476	1	1.56044e-07	1.24365e-07	0	0	0	0	0	0
		0.34716	1	0	0	0		0.34716	1	3.30934e-07	1.16993e-08	0	0	0	0	0	0							0.34716	1	0	0	0		0.34716	1	2.50421e-07	2.25596e-07	0	0	0	0	0	0
		0.35955	1	0	0	0		0.35955	1	5.1125e-07	2.06766e-08	0	0	0	0	0	0							0.35955	1	0	0	0		0.35955	1	3.85777e-07	3.86906e-07	0	0	0	0	0	0
		0.37195	1	0	0	0		0.37195	1	7.62568e-07	3.46316e-08	0	0	0	0	0	0							0.37195	1	0	0	0		0.37195	1	5.7384e-07	6.32148e-07	0	0	0	0	0	0
		0.38435	1	0	0	0		0.38435	1	1.10339e-06	5.54868e-08	0	0	0	0	0	0							0.38435	1	0	0	0		0.38435	1	8.28112e-07	9.91564e-07	0	0	0	0	0	0
		0.39675	1	0	0	0		0.39675	1	1.55439e-06	8.55661e-08	0	0	0	0	0	0							0.39675	1	0	0	0		0.39675	1	1.16366e-06	1.50123e-06	0	0	0	0	0	0
		0.40915	1	0	0	0		0.40915	1	2.13842e-06	1.27651e-07	0	0	0	0	0	0							0.40915	1	0	0	0		0.40915	1	1.59694e-06	2.20354e-06	0	0	0	0	0	0
		0.42155	1	0	0	0		0.42155	1	2.88053e-06	1.85e-07	6.79519e-16	0	0	0	0	0							0.42155	1	0	0	0		0.42155	0.99999	2.14629e-06	3.14806e-06	0	0	0	0	0	0
		0.43394	1	0	0	0		0.43394	1	3.8076e-06	2.61317e-07	1.02733e-14	0	0	0	0	0							0.43394	1	0	0	0		0.43394	0.99999	2.83093e-06	4.39026e-06	0	0	0	0	0	0
		0.44634	1	0	0	0		0.44634	0.99999	4.94805e-06	3.60789e-07	7.54352e-14	0	0	0	0	0							0.44634	1	0	0	0		0.44634	0.99999	3.67152e-06	5.99236e-06	1.79646e-15	0	0	0	0	0
		0.45874	1	0	0	0		0.45874	0.99999	6.33215e-06	4.8805e-07	3.71339e-13	0	0	0	0	0							0.45874	1	0	0	0		0.45874	0.99999	4.68945e-06	8.02285e-06	3.67729e-14	0	0	0	0	0
		0.47114	1	0	0	0		0.47114	0.99999	7.99099e-06	6.48188e-07	1.35689e-12	0	0	0	0	0							0.47114	1	0	0	0		0.47114	0.99998	5.90722e-06	1.05562e-05	1.61254e-13	0	0	0	0	0
		0.48354	1	0	0	0		0.48354	0.99999	9.95674e-06	8.46685e-07	4.00922e-12	0	0	0	0	0							0.48354	1	0	0	0		0.48354	0.99998	7.34775e-06	1.36722e-05	6.5532e-13	0	0	0	0	0
		0.49594	1	0	0	0		0.49594	0.99999	1.2262e-05	1.08943e-06	1.04377e-11	0	0	0	0	0							0.49594	1	0	0	0		0.49594	0.99997	9.03456e-06	1.74559e-05	1.89162e-12	0	0	0	0	0
		0.50834	1	0	0	0		0.50834	0.99998	1.49407e-05	1.38263e-06	2.48341e-11	0	0	0	0	0							0.50834	1	0	0	0		0.50834	0.99997	1.09915e-05	2.19968e-05	4.67755e-12	0	0	0	0	0
		0.52073	1	0	0	0		0.52073	0.99998	1.80265e-05	1.73285e-06	5.42898e-11	0	0	0	0	0							0.52073	1	0	0	0		0.52073	0.99996	1.32422e-05	2.73886e-05	1.0834e-11	0	0	0	0	0
		0.53313	1	0	0	0		0.53313	0.99998	2.15521e-05	2.14681e-06	1.10212e-10	0	0	0	0	0							0.53313	1	0	0	0		0.53313	0.99995	1.58106e-05	3.37265e-05	2.33616e-11	0	0	0	0	0
		0.54553	1	0	0	0		0.54553	0.99997	2.5552e-05	2.63152e-06	2.1104e-10	0	0	0	0	0							0.54553	1	0	0	0		0.54553	0.99994	1.872e-05	4.11116e-05	4.69773e-11	0	0	0	0	0
		0.55793	1	0	0	0		0.55793	0.99997	3.00581e-05	3.19442e-06	3.84963e-10	0	0	0	0	0							0.55793	1	0	0	0		0.55793	0.99993	2.19961e-05	4.9648e-05	8.89129e-11	0	0	0	0	0
		0.57033	1	0	0	0		0.57033	0.99996	3.51043e-05	3.84249e-06	6.72234e-10	0	0	0	0	0							0.57033	1	0	0	0		0.57033	0.99991	2.56581e-05	5.94349e-05	1.60218e-10	0	0	0	0	0
		0.58273	1	0	0	0		0.58273	0.99995	4.07197e-05	4.58327e-06	1.12904e-09	0	0	0	0	0							0.58273	1	0	0	0		0.58273	0.9999	2.97295e-05	7.05746e-05	2.7703e-10	0	0	0	0	0
		0.59512	1	0	0	0		0.59512	0.99995	4.69371e-05	5.42429e-06	1.83339e-09	0	0	0	0	0							0.59512	1	0	0	0		0.59512	0.99988	3.42341e-05	8.3176e-05	4.61638e-10	0	0	0	0	0
		0.60752	1	1.4126e-10	0	0		0.60752	0.99994	5.37875e-05	6.37329e-06	2.88899e-09	0	0	0	0	0							0.60752	1	1.98536e-10	0	0		0.60752	0.99986	3.9191e-05	9.7341e-05	7.44173e-10	0	0	0	0	0
		0.61992	1	1.37912e-09	0	0		0.61992	0.99993	6.12971e-05	7.43724e-06	4.43075e-09	0	0	0	0	0							0.61992	1	1.7759e-09	0	0		0.61992	0.99984	4.46212e-05	0.000113172	1.16466e-09	0	0	0	0	0
		0.63232	1	7.04088e-09	0	0		0.63232	0.99992	6.94957e-05	8.62384e-06	6.63038e-09	0	0	0	0	0							0.63232	1	8.48434e-09	0	0		0.63232	0.99982	5.05428e-05	0.000130784	1.77509e-09	0	0	0	0	0
		0.64472	1	2.55537e-08	0	0		0.64472	0.99991	7.8407e-05	9.9402e-06	9.70483e-09	0	0	0	0	0							0.64472	1	3.08226e-08	0	0		0.64472	0.99979	5.69756e-05	0.000150257	2.64218e-09	0	0	0	0	0
		0.65712	1	7.80045e-08	0	0		0.65712	0.9999	8.80549e-05	1.13938e-05	1.39211e-08	0	0	0	0	0							0.65712	1	9.1845e-08	0	0		0.65712	0.99976	6.39363e-05	0.000171701	3.84844e-09	0	0	0	0	0
		0.66951	1	2.05396e-07	5.89485e-11	0		0.66951	0.99989	9.84721e-05	1.29914e-05	1.96036e-08	0	0	0	0	0							0.66951	1	2.38625e-07	0	0		0.66951	0.99973	7.14361e-05	0.000195209	5.49633e-09	0	0	0	0	0
		0.68191	1	4.84548e-07	1.26363e-09	0		0.68191	0.99988	0.00010966	1.47393e-05	2.71401e-08	0	0	0	0	0							0.68191	1	5.59135e-07	6.89468e-11	0		0.68191	0.9997	7.94984e-05	0.000220874	7.70945e-09	0	0	0	0	0
		0.69431	1	1.05008e-06	9.75731e-09	0		0.69431	0.99986	0.000121661	1.66455e-05	3.69937e-08	0	0	0	0	0							0.69431	1	1.20053e-06	1.1371e-09	0		0.69431	0.99966	8.81334e-05	0.000248787	1.0636e-08	0	0	0	0	0
		0.70671	1	2.11767e-06	4.70287e-08	0		0.70671	0.99985	0.000134484	1.87152e-05	4.9703e-08	0	0	0	0	0							0.70671	1	2.40589e-06	7.73772e-09	0		0.70671	0.99962	9.73548e-05	0.000279045	1.44507e-08	0	0	0	0	0
		0.71911	1	4.02483e-06	1.71753e-07	0		0.71911	0.99983	0.000148144	2.09549e-05	6.58908e-08	0	0	0	0	0							0.71911	1	4.54886e-06	3.47312e-08	0		0.71911	0.99958	0.000107174	0.000311726	1.93602e-08	0	0	0	0	0
		0.73151	0.99999	7.27171e-06	5.20318e-07	0		0.73151	0.99981	0.000162665	2.33703e-05	8.62765e-08	0	0	0	0	0							0.73151	0.99999	8.17796e-06	1.21266e-07	0		0.73151	0.99954	0.000117598	0.00034688	2.55985e-08	0	0	0	0	0
		0.74391	0.99999	1.25731e-05	1.37423e-06	0		0.74391	0.9998	0.000178048	2.59677e-05	1.11678e-07	0	0	0	0	0							0.74391	0.99999	1.40828e-05	3.56151e-07	0		0.74391	0.99949	0.000128651	0.00038463	3.34395e-08	0	0	0	0	0
		0.7563	0.99998	2.09256e-05	3.26443e-06	0		0.7563	0.99978	0.000194317	2.8752e-05	1.43e-07	0	0	0	0	0							0.7563	0.99998	2.33549e-05	9.19663e-07	0		0.7563	0.99943	0.000140319	0.000425005	4.31897e-08	0	0	0	0	0
		0.7687	0.99996	3.36723e-05	7.12251e-06	0		0.7687	0.99976	0.000211483	3.17282e-05	1.81284e-07	0	0	0	0	0							0.7687	0.99996	3.74589e-05	2.14782e-06	0		0.7687	0.99938	0.000152629	0.000468119	5.51983e-08	0	0	0	0	0
		0.7811	0.99993	5.25833e-05	1.44902e-05	0		0.7811	0.99974	0.000229554	3.49015e-05	2.27662e-07	0	0	0	0	0							0.7811	0.99994	5.83299e-05	4.62497e-06	0		0.7811	0.99932	0.000165581	0.000514003	6.98557e-08	0	0	0	0	0
		0.7935	0.99989	7.99416e-05	2.77942e-05	0		0.7935	0.99971	0.000248533	3.82747e-05	2.83387e-07	0	0	0	0	0							0.7935	0.9999	8.84598e-05	9.31212e-06	0		0.7935	0.99926	0.00017917	0.000562707	8.75867e-08	0	0	0	0	0
		0.8059	0.99983	0.000118645	5.07025e-05	0		0.8059	0.99969	0.000268429	4.18562e-05	3.49846e-07	0	0	0	0	0							0.8059	0.99985	0.000130968	1.77134e-05	0		0.8059	0.99919	0.00019342	0.000614307	1.08871e-07	0	0	0	0	0
		0.8183	0.99974	0.000172267	8.85509e-05	0		0.8183	0.99966	0.000289259	4.56432e-05	4.28535e-07	0	0	0	0	0							0.8183	0.99978	0.00018977	3.20963e-05	2.09742e-13		0.8183	0.99912	0.000208338	0.000668882	1.34237e-07	0	0	0	0	0
		0.83069	0.99961	0.000245216	0.000148873	0		0.83069	0.99964	0.000311013	4.96447e-05	5.2105e-07	0	0	0	0	0							0.83069	0.99967	0.000269614	5.57465e-05	5.36964e-11		0.83069	0.99905	0.000223891	0.000726351	1.64228e-07	0	0	0	0	0
		0.84309	0.99942	0.000342759	0.000242005	0		0.84309	0.99961	0.000333705	5.38628e-05	6.29169e-07	0	0	0	0	0							0.84309	0.99953	0.000376211	9.32978e-05	1.0724e-09		0.84309	0.99897	0.000240112	0.000786948	1.99474e-07	0	0	0	0	0
		0.85549	0.99915	0.000471173	0.00038178	3.45943e-13		0.85549	0.99958	0.000357329	5.82982e-05	7.54756e-07	0	0	0	0	0							0.85549	0.99933	0.000516357	0.000151098	9.19553e-09		0.85549	0.99889	0.000256999	0.000850561	2.40651e-07	0	0	0	0	0
		0.86789	0.99878	0.000637859	0.000586269	7.11796e-11		0.86789	0.99955	0.000381895	6.29577e-05	8.99846e-07	0	0	0	0	0							0.86789	0.99906	0.000698039	0.000237643	4.99108e-08		0.86789	0.99881	0.000274547	0.000917302	2.88443e-07	0	0	0	0	0
		0.88029	0.99827	0.000851278	0.000878729	1.29124e-09		0.88029	0.99952	0.000407381	6.78378e-05	1.06644e-06	0	0	0	0	0							0.88029	0.99871	0.000930459	0.000364015	2.02883e-07		0.88029	0.99872	0.000292751	0.000987139	3.43629e-07	0	0	0	0	0
		0.89269	0.99759	0.00112	0.00129	1.04269e-08		0.89269	0.99949	0.000433843	7.29482e-05	1.25696e-06	0	0	0	0	0							0.89269	0.99823	0.00122	0.000544451	6.75289e-07		0.89269	0.99863	0.000311618	0.00106	4.06983e-07	0	0	0	0	0
		0.90508	0.99669	0.00146	0.00185	5.42278e-08		0.90508	0.99946	0.000461192	7.82841e-05	1.47363e-06	0	0	0	0	0							0.90508	0.99761	0.00159	0.000796925	1.93898e-06		0.90508	0.99853	0.00033114	0.00114	4.79378e-07	0	0	0	0	0
		0.91748	0.99551	0.00188	0.00261	2.13009e-07		0.91748	0.99942	0.000489478	8.38496e-05	1.71898e-06	1.35529e-19	3.24811e-19	0	0	0							0.91748	0.99681	0.00204	0.00114	4.96453e-06		0.91748	0.99843	0.000351324	0.00122	5.61717e-07	4.65691e-18	1.47696e-17	0	0	0
		0.92988	0.99399	0.00239	0.00362	6.8909e-07		0.92988	0.99939	0.000518708	8.96443e-05	1.99561e-06	4.61938e-18	1.64074e-17	0	0	0							0.92988	0.99578	0.0026	0.00161	1.15948e-05		0.92988	0.99833	0.000372143	0.0013	6.54927e-07	8.65678e-17	3.30605e-16	0	0	0
		0.94228	0.99205	0.00301	0.00494	1.93134e-06		0.94228	0.99935	0.000548854	9.56735e-05	2.30626e-06	5.07844e-17	2.15752e-16	0	0	0							0.94228	0.99447	0.00327	0.00223	2.51015e-05		0.94228	0.99822	0.000393621	0.00138	7.59998e-07	6.97724e-16	3.18476e-15	0	0	0
		0.95468	0.9896	0.00375	0.00665	4.84267e-06		0.95468	0.99932	0.000579911	0.000101933	2.65362e-06	3.26892e-16	1.59136e-15	0	0	0							0.95468	0.99282	0.00408	0.00305	5.09849e-05		0.95468	0.99811	0.000415742	0.00147	8.77938e-07	3.86018e-15	1.97066e-14	0	0	0
		0.96708	0.98654	0.00463	0.00882	1.11007e-05		0.96708	0.99928	0.000611873	0.000108427	3.04072e-06	1.55922e-15	8.35073e-15	0	0	0							0.96708	0.99076	0.00505	0.0041	9.80536e-05		0.96708	0.998	0.000438504	0.00157	1.0099e-06	1.65953e-14	9.21146e-14	0	0	0
		0.97948	0.98276	0.00567	0.01155	2.36318e-05		0.97948	0.99924	0.000644723	0.00011515	3.47034e-06	6.04423e-15	3.4825e-14	0	0	0							0.97948	0.9882	0.00618	0.00544	0.000179854		0.97948	0.99788	0.000461908	0.00166	1.15691e-06	5.96089e-14	3.53367e-13	0	0	0
		0.99187	0.97813	0.00689	0.01493	4.72587e-05		0.99187	0.9992	0.000678505	0.000122114	3.94604e-06	2.00894e-14	1.22734e-13	0	0	0							0.99187	0.98505	0.00751	0.00712	0.000316451		0.99187	0.99775	0.000485909	0.00176	1.32013e-06	1.86819e-13	1.16826e-12	0	0	0
		1.00427	0.97251	0.0083	0.01909	8.95759e-05		1.00427	0.99915	0.000713167	0.000129302	4.47057e-06	5.9225e-14	3.79759e-13	0	0	0							1.00427	0.98118	0.00906	0.00922	0.000536584		1.00427	0.99763	0.000510569	0.00186	1.50077e-06	5.25413e-13	3.43549e-12	0	0	0
		1.01667	0.96577	0.00992	0.02414	0.000162027		1.01667	0.99911	0.000748663	0.000136728	5.04739e-06	1.58481e-13	1.05851e-12	0	0	0							1.01667	0.97648	0.01085	0.01179	0.000880295		1.01667	0.9975	0.00053581	0.00197	1.69998e-06	1.35222e-12	9.18438e-12	0	0	0
		1.02907	0.95775	0.01177	0.0302	0.000281242		1.02907	0.99906	0.000785087	0.00014439	5.6797e-06	3.91305e-13	2.70692e-12	0	0	0							1.02907	0.97078	0.01289	0.01493	0.0014		1.02907	0.99736	0.000561684	0.00207	1.91902e-06	3.23094e-12	2.26773e-11	0	0	0
		1.04147	0.94829	0.01385	0.03739	0.000470494		1.04147	0.99902	0.000822332	0.000152279	6.37096e-06	9.02593e-13	6.43754e-12	0	0	0							1.04147	0.96393	0.0152	0.0187	0.00217		1.04147	0.99722	0.000588143	0.00219	2.15922e-06	7.24522e-12	5.23424e-11	0	0	0
		1.05387	0.93724	0.01617	0.04583	0.000761458		1.05387	0.99897	0.000860415	0.000160395	7.12457e-06	1.96343e-12	1.43868e-11	0	0	0							1.05387	0.95573	0.0178	0.02318	0.00328		1.05387	0.99708	0.000615182	0.0023	2.42194e-06	1.53796e-11	1.1398e-10	0	0	0
		1.06626	0.92443	0.01875	0.05563	0.0012		1.06626	0.99892	0.000899355	0.000168749	7.94434e-06	4.05877e-12	3.04617e-11	0	0	0							1.06626	0.94599	0.0207	0.02847	0.00484		1.06626	0.99694	0.00064284	0.00242	2.70834e-06	3.11141e-11	2.35916e-10	4.45281e-20	0	0
		1.07866	0.90972	0.02158	0.06688	0.00183		1.07866	0.99887	0.000939111	0.000177325	8.83326e-06	8.02077e-12	6.1513e-11	8.41264e-20	0	0							1.07866	0.93449	0.0239	0.03461	0.007		1.07866	0.99679	0.00067105	0.00254	3.01984e-06	6.03223e-11	4.66894e-10	2.74861e-18	0	0
		1.09106	0.89298	0.02465	0.07965	0.00272		1.09106	0.99882	0.000979691	0.000186127	9.79555e-06	1.52304e-11	1.19104e-10	2.26974e-18	0	0							1.09106	0.921	0.0274	0.04169	0.00991		1.09106	0.99663	0.000699793	0.00266	3.35756e-06	1.12594e-10	8.87888e-10	3.88656e-17	0	0
		1.10346	0.87411	0.02795	0.09398	0.00395		1.10346	0.99877	0.00102	0.000195159	1.08342e-05	2.79039e-11	2.22113e-10	2.24283e-17	0	0							1.10346	0.90532	0.03118	0.04974	0.01376		1.10346	0.99648	0.000729115	0.00279	3.72336e-06	2.03131e-10	1.62929e-09	3.02866e-16	0	0
		1.11586	0.85305	0.03146	0.10987	0.00562		1.11586	0.99872	0.00106	0.000204414	1.19529e-05	4.9502e-11	4.00472e-10	1.41145e-16	0	0							1.11586	0.88722	0.03522	0.05878	0.01877		1.11586	0.99632	0.000759038	0.00292	4.11847e-06	3.55362e-10	2.89509e-09	1.65796e-15	6.63706e-21	0
		1.12826	0.82974	0.03513	0.12729	0.00783		1.12826	0.99867	0.00111	0.000213885	1.31561e-05	8.52812e-11	7.00308e-10	6.7149e-16	3.72256e-20	0							1.12826	0.86656	0.03949	0.06881	0.02515		1.12826	0.99615	0.000789444	0.00305	4.5439e-06	6.04485e-10	4.99577e-09	7.14708e-15	1.79195e-18	0
		1.14065	0.80422	0.03895	0.14613	0.01069		1.14065	0.99861	0.00115	0.000223593	1.44473e-05	1.43078e-10	1.19113e-09	2.62224e-15	2.33093e-18	0							1.14065	0.84318	0.04393	0.07978	0.03312		1.14065	0.99598	0.000820391	0.00319	5.00165e-06	1.00232e-09	8.39421e-09	2.59288e-14	5.15815e-17	0
		1.15305	0.77657	0.04285	0.16625	0.01433		1.15305	0.99856	0.00119	0.000233497	1.58287e-05	2.34246e-10	1.9751e-09	8.8229e-15	3.76615e-17	0							1.15305	0.81701	0.04848	0.0916	0.04291		1.15305	0.99581	0.000851861	0.00333	5.49254e-06	1.62348e-09	1.37648e-08	8.23881e-14	5.96059e-16	0
		1.16545	0.74691	0.04678	0.18745	0.01886		1.16545	0.9985	0.00124	0.000243627	1.7306e-05	3.75013e-10	3.19954e-09	2.64054e-14	3.23019e-16	0							1.16545	0.78808	0.05306	0.10415	0.05472		1.16545	0.99564	0.000883854	0.00347	6.01869e-06	2.5735e-09	2.20707e-08	2.35442e-13	4.22619e-15	0
		1.17785	0.71543	0.05069	0.20948	0.02441		1.17785	0.99844	0.00129	0.000253968	1.88814e-05	5.88071e-10	5.07295e-09	7.18485e-14	1.90723e-15	0							1.17785	0.75647	0.05759	0.11726	0.06869		1.17785	0.99546	0.000916323	0.00362	6.58084e-06	3.99893e-09	3.46639e-08	6.16476e-13	2.19559e-14	0
		1.19025	0.68238	0.0545	0.23205	0.03107		1.19025	0.99838	0.00133	0.000264516	2.05593e-05	9.04757e-10	7.88562e-09	1.80583e-13	8.74319e-15	0							1.19025	0.7224	0.06197	0.13071	0.08492		1.19025	0.99528	0.000949302	0.00376	7.18068e-06	6.10008e-09	5.3407e-08	1.4998e-12	9.18453e-14	0
		1.20265	0.64805	0.05816	0.25485	0.03894		1.20265	0.99832	0.00138	0.000275292	2.23427e-05	1.36748e-09	1.20343e-08	4.24251e-13	3.33471e-14	0							1.20265	0.68616	0.06612	0.14427	0.10345		1.20265	0.99509	0.000982756	0.00392	7.81979e-06	9.14686e-09	8.08382e-08	3.42652e-12	3.26859e-13	0
		1.21505	0.6128	0.06161	0.2775	0.04809		1.21505	0.99826	0.00143	0.000286254	2.42362e-05	2.03306e-09	1.80545e-08	9.40402e-13	1.10476e-13	0							1.21505	0.64816	0.06995	0.15768	0.12421		1.21505	0.99491	0.00102	0.00407	8.49939e-06	1.34982e-08	1.20348e-07	7.41205e-12	1.0252e-12	0
		1.22744	0.57697	0.06479	0.2997	0.05855		1.22744	0.9982	0.00148	0.000297422	2.62434e-05	2.97616e-09	2.66563e-08	1.98122e-12	3.27148e-13	0							1.22744	0.60889	0.07337	0.17067	0.14708		1.22744	0.99471	0.00105	0.00423	9.22068e-06	1.96237e-08	1.76425e-07	1.52832e-11	2.90326e-12	0
		1.23984	0.54094	0.06765	0.32109	0.07032		1.23984	0.99814	0.00153	0.000308792	2.83671e-05	4.29453e-09	3.87762e-08	3.99061e-12	8.83642e-13	0							1.23984	0.56886	0.07632	0.183	0.17183		1.23984	0.99452	0.00109	0.00438	9.9859e-06	2.81325e-08	2.54913e-07	3.02006e-11	7.55461e-12	0
		1.25224	0.5051	0.07016	0.34135	0.08338		1.25224	0.99807	0.00158	0.000320365	3.06112e-05	6.11383e-09	5.56237e-08	7.72344e-12	2.20954e-12	0							1.25224	0.52863	0.07875	0.19443	0.19819		1.25224	0.99432	0.00112	0.00455	1.07956e-05	3.98053e-08	3.63368e-07	5.74561e-11	1.83012e-11	0
		1.26464	0.4698	0.07229	0.36023	0.09767		1.26464	0.99801	0.00163	0.000332131	3.29795e-05	8.59409e-09	7.87544e-08	1.44218e-11	5.17301e-12	0							1.26464	0.48875	0.08063	0.20479	0.22583		1.26464	0.99412	0.00116	0.00471	1.16508e-05	5.56322e-08	5.11403e-07	1.05638e-10	4.16896e-11	0
		1.27704	0.43536	0.07403	0.3775	0.11311		1.27704	0.99794	0.00168	0.000344104	3.54755e-05	1.19379e-08	1.10147e-07	2.60737e-11	1.1441e-11	0							1.27704	0.44973	0.08196	0.21393	0.25439		1.27704	0.99392	0.00119	0.00488	1.25542e-05	7.68531e-08	7.11234e-07	1.88323e-10	9.00236e-11	0
		1.28944	0.40207	0.07536	0.39298	0.12959		1.28944	0.99788	0.00173	0.00035624	3.80997e-05	1.63959e-08	1.52263e-07	4.57718e-11	2.40716e-11	0							1.28944	0.41201	0.08275	0.22175	0.2835		1.28944	0.99371	0.00123	0.00505	1.35062e-05	1.05013e-07	9.78062e-07	3.26396e-10	1.85451e-10	0
		1.30183	0.37016	0.0763	0.40658	0.14697		1.30183	0.99781	0.00178	0.000368583	4.08603e-05	2.22818e-08	2.08205e-07	7.82326e-11	4.8464e-11	0							1.30183	0.37596	0.08302	0.22823	0.31279		1.30183	0.9935	0.00127	0.00522	1.4508e-05	1.42015e-07	1.33067e-06	5.51327e-10	3.66403e-10	0
		1.31423	0.33982	0.07685	0.41822	0.16511		1.31423	0.99774	0.00183	0.000381109	4.37574e-05	2.99788e-08	2.81779e-07	1.30469e-10	9.38085e-11	0							1.31423	0.34188	0.08282	0.23337	0.34193		1.31423	0.99329	0.0013	0.00539	1.55616e-05	1.90191e-07	1.79235e-06	9.09556e-10	6.97329e-10	0
		1.32663	0.31119	0.07705	0.42789	0.18387		1.32663	0.99767	0.00189	0.000393794	4.67969e-05	3.99541e-08	3.77642e-07	2.12714e-10	1.75274e-10	0							1.32663	0.30996	0.08219	0.23721	0.37064		1.32663	0.99307	0.00134	0.00557	1.66678e-05	2.52353e-07	2.3913e-06	1.46819e-09	1.28315e-09	0
		1.33903	0.28434	0.07692	0.43564	0.20309		1.33903	0.9976	0.00194	0.000406679	4.99767e-05	5.27676e-08	5.01456e-07	3.39656e-10	3.17213e-10	0							1.33903	0.28032	0.08119	0.23983	0.39866		1.33903	0.99285	0.00138	0.00575	1.78285e-05	3.31907e-07	3.16153e-06	2.32278e-09	2.29014e-09	0
		1.35143	0.25932	0.07649	0.44155	0.22264		1.35143	0.99753	0.002	0.000419743	5.33054e-05	6.90992e-08	6.60012e-07	5.31938e-10	5.57599e-10	0							1.35143	0.253	0.07988	0.24132	0.42581		1.35143	0.99263	0.00142	0.00593	1.9043e-05	4.32897e-07	4.14432e-06	3.60648e-09	3.97512e-09	0
		1.36383	0.23613	0.0758	0.4457	0.24237		1.36383	0.99746	0.00205	0.000432972	5.67824e-05	8.97542e-08	8.61529e-07	8.18313e-10	9.54637e-10	0							1.36383	0.22796	0.07831	0.2418	0.45193		1.36383	0.9924	0.00146	0.00611	2.03143e-05	5.60166e-07	5.38854e-06	5.50345e-09	6.72653e-09	0
		1.37622	0.21474	0.07487	0.44824	0.26215		1.37622	0.99738	0.00211	0.000446363	6.04132e-05	1.15687e-07	1.11565e-06	1.23793e-09	1.59506e-09	0							1.37622	0.20517	0.07654	0.24138	0.47691		1.37622	0.99217	0.0015	0.0063	2.16446e-05	7.19424e-07	6.95249e-06	8.26346e-09	1.112e-08	0
		1.38862	0.19509	0.07375	0.44927	0.28188		1.38862	0.99731	0.00216	0.000459919	6.41992e-05	1.48017e-07	1.43386e-06	1.84363e-09	2.60603e-09	0							1.38862	0.18451	0.07461	0.24019	0.50069		1.38862	0.99194	0.00154	0.00649	2.30308e-05	9.17202e-07	8.90312e-06	1.22193e-08	1.79874e-08	8.3913e-20
		1.40102	0.17711	0.07246	0.44897	0.30145		1.40102	0.99724	0.00222	0.000473641	6.81439e-05	1.88061e-07	1.82962e-06	2.70579e-09	4.17086e-09	0							1.40102	0.16585	0.07257	0.23834	0.52324		1.40102	0.99171	0.00158	0.00668	2.44789e-05	1.16152e-06	1.13224e-05	1.78157e-08	2.85241e-08	8.12716e-18
		1.41342	0.16071	0.07104	0.44747	0.32078		1.41342	0.99716	0.00228	0.000487535	7.22502e-05	2.37341e-07	2.31873e-06	3.91725e-09	6.5483e-09	0							1.41342	0.14906	0.07046	0.23593	0.54455		1.41342	0.99147	0.00162	0.00687	2.59878e-05	1.4612e-06	1.43017e-05	2.56317e-08	4.4402e-08	1.91976e-16
		1.42582	0.14578	0.06951	0.44492	0.33978		1.42582	0.99708	0.00234	0.000501595	7.65234e-05	2.97627e-07	2.91938e-06	5.59827e-09	1.00992e-08	0							1.42582	0.13399	0.06831	0.23307	0.56464		1.42582	0.99123	0.00166	0.00707	2.75577e-05	1.8267e-06	1.79494e-05	3.64142e-08	6.79302e-08	2.26028e-15
		1.43822	0.13224	0.06791	0.44145	0.3584		1.43822	0.99701	0.00239	0.000515754	8.09531e-05	3.70927e-07	3.65221e-06	7.90331e-09	1.53179e-08	0							1.43822	0.12048	0.06613	0.22984	0.58354		1.43822	0.99099	0.0017	0.00726	2.91924e-05	2.27009e-06	2.23907e-05	5.11284e-08	1.02274e-07	1.73031e-14
		1.45062	0.11996	0.06624	0.43719	0.37661		1.45062	0.99693	0.00245	0.000530118	8.55622e-05	4.59614e-07	4.54224e-06	1.10317e-08	2.28773e-08	2.23326e-21							1.45062	0.1084	0.06397	0.22633	0.60129		1.45062	0.99074	0.00174	0.00746	3.08901e-05	2.8049e-06	2.77661e-05	7.09851e-08	1.51674e-07	9.85227e-14
		1.46301	0.10885	0.06454	0.43228	0.39432		1.46301	0.99685	0.00251	0.000544627	9.03401e-05	5.66332e-07	5.61687e-06	1.52319e-08	3.36742e-08	2.09193e-19							1.46301	0.0976	0.06183	0.2226	0.61797		1.46301	0.99049	0.00178	0.00766	3.2651e-05	3.44651e-06	3.42372e-05	9.7522e-08	2.21775e-07	4.51656e-13
		1.47541	0.09881	0.06282	0.4268	0.41158		1.47541	0.99677	0.00257	0.000559272	9.52909e-05	6.94062e-07	6.90744e-06	2.08167e-08	4.88912e-08	4.67823e-18							1.47541	0.08795	0.05974	0.2187	0.63361		1.47541	0.99023	0.00182	0.00786	3.44801e-05	4.21296e-06	4.19933e-05	1.32645e-07	3.19989e-07	1.75379e-12
		1.48781	0.08975	0.06108	0.42087	0.4283		1.48781	0.99669	0.00263	0.000574029	0.000100415	8.46204e-07	8.4496e-06	2.81732e-08	7.00786e-08	5.25068e-17							1.48781	0.07934	0.05768	0.21471	0.64827		1.48781	0.98998	0.00186	0.00807	3.63771e-05	5.12374e-06	5.12374e-05	1.7872e-07	4.55986e-07	5.96956e-12
		1.50021	0.08156	0.05936	0.41458	0.4445		1.50021	0.9966	0.00269	0.000588935	0.000105718	1.02664e-06	1.0284e-05	3.77808e-08	9.92411e-08	3.8613e-16							1.50021	0.07165	0.05569	0.21063	0.66203		1.50021	0.98971	0.0019	0.00827	3.83397e-05	6.20108e-06	6.22075e-05	2.38639e-07	6.42162e-07	1.82499e-11
		1.51261	0.07418	0.05764	0.408	0.46017		1.51261	0.99652	0.00275	0.000603997	0.000111202	1.23963e-06	1.24559e-05	5.02223e-08	1.38941e-07	2.12576e-15							1.51261	0.06478	0.05376	0.20653	0.67493		1.51261	0.98945	0.00195	0.00848	4.0371e-05	7.47005e-06	7.51653e-05	3.15926e-07	8.94343e-07	5.10174e-11
		1.52501	0.06753	0.05596	0.40121	0.47531		1.52501	0.99644	0.00281	0.000619196	0.000116869	1.49001e-06	1.50169e-05	6.62113e-08	1.92439e-07	9.47014e-15							1.52501	0.05865	0.0519	0.20243	0.68703		1.52501	0.98918	0.00199	0.00869	4.24703e-05	8.95837e-06	9.04067e-05	4.14859e-07	1.23251e-06	1.32191e-10
		1.5374	0.06152	0.0543	0.39427	0.48991		1.5374	0.99635	0.00287	0.000634511	0.00012272	1.78309e-06	1.80229e-05	8.65967e-08	2.63822e-07	3.58785e-14							1.5374	0.05316	0.0501	0.19835	0.69839		1.5374	0.9889	0.00203	0.0089	4.46415e-05	1.06971e-05	0.000108262	5.40569e-07	1.68173e-06	3.20855e-10
		1.5498	0.0561	0.05268	0.38722	0.504		1.5498	0.99626	0.00293	0.00064994	0.000128753	2.12475e-06	2.15379e-05	1.12405e-07	3.58192e-07	1.19547e-13							1.5498	0.04826	0.04837	0.1943	0.70907		1.5498	0.98862	0.00207	0.00912	4.68828e-05	1.27198e-05	0.000129098	6.99172e-07	2.27289e-06	7.3568e-10
		1.5622	0.05121	0.05109	0.38013	0.51757		1.5622	0.99618	0.003	0.000665505	0.000134978	2.52181e-06	2.56291e-05	1.4486e-07	4.81863e-07	3.58739e-13							1.5622	0.04387	0.04672	0.19033	0.71909		1.5622	0.98833	0.00212	0.00933	4.91958e-05	1.50649e-05	0.000153304	8.97929e-07	3.04455e-06	1.6043e-09
		1.5746	0.04679	0.04955	0.37302	0.53064		1.5746	0.99609	0.00306	0.000681189	0.000141388	2.98113e-06	3.0378e-05	1.85404e-07	6.42592e-07	9.86542e-13							1.5746	0.03993	0.04513	0.18641	0.72853		1.5746	0.98804	0.00216	0.00954	5.15805e-05	1.77737e-05	0.000181335	1.14545e-06	4.04342e-06	3.34607e-09
		1.587	0.04281	0.04806	0.36592	0.54321		1.587	0.99599	0.00312	0.000697004	0.000147994	3.51086e-06	3.58679e-05	2.35736e-07	8.49844e-07	2.51957e-12							1.587	0.0364	0.04361	0.18259	0.73741		1.587	0.98774	0.0022	0.00976	5.40388e-05	2.0892e-05	0.00021368	1.45175e-06	5.32656e-06	6.70641e-09
		1.5994	0.0392	0.04661	0.35887	0.55532		1.5994	0.9959	0.00318	0.000712913	0.000154788	4.11959e-06	4.2192e-05	2.97843e-07	1.11506e-06	6.03725e-12							1.5994	0.03322	0.04215	0.17884	0.74579		1.5994	0.98743	0.00225	0.00998	5.65701e-05	2.44692e-05	0.000250879	1.82869e-06	6.96244e-06	1.29669e-08
		1.61179	0.03593	0.0452	0.35192	0.56694		1.61179	0.99581	0.00325	0.00072894	0.000161776	4.81704e-06	4.94523e-05	3.74049e-07	1.45203e-06	1.36845e-11							1.61179	0.03037	0.04076	0.17517	0.75369		1.61179	0.98711	0.00229	0.0102	5.91705e-05	2.85578e-05	0.000293498	2.28976e-06	9.03376e-06	2.42675e-08
		1.62419	0.03298	0.04385	0.34502	0.57815		1.62419	0.99571	0.00331	0.000745051	0.000168954	5.61313e-06	5.77602e-05	4.67029e-07	1.8772e-06	2.95361e-11							1.62419	0.0278	0.03943	0.17161	0.76115		1.62419	0.98679	0.00234	0.01042	6.1851e-05	3.3219e-05	0.000342189	2.85092e-06	1.16389e-05	4.40899e-08
		1.63659	0.0303	0.04254	0.33825	0.58891		1.63659	0.99561	0.00337	0.000761356	0.000176335	6.51992e-06	6.72432e-05	5.79937e-07	2.41035e-06	6.10407e-11							1.63659	0.02549	0.03817	0.16815	0.76819		1.63659	0.98646	0.00238	0.01064	6.46026e-05	3.85163e-05	0.000397633	3.5303e-06	1.48938e-05	7.7958e-08
		1.64899	0.02788	0.04128	0.33159	0.59926		1.64899	0.99551	0.00344	0.000777648	0.000183905	7.54871e-06	7.80222e-05	7.16249e-07	3.07428e-06	1.21318e-10							1.64899	0.0234	0.03696	0.16478	0.77487		1.64899	0.98611	0.00242	0.01087	6.74309e-05	4.45189e-05	0.000460598	4.3487e-06	1.89361e-05	1.34445e-07
		1.66139	0.02567	0.04006	0.32504	0.60922		1.66139	0.99541	0.0035	0.000794089	0.000191686	8.71321e-06	9.02559e-05	8.80164e-07	3.89677e-06	2.32829e-10							1.66139	0.02151	0.0358	0.16151	0.78119		1.66139	0.98576	0.00247	0.01109	7.03347e-05	5.13014e-05	0.000531916	5.33016e-06	2.39278e-05	2.26593e-07
		1.67379	0.02367	0.03889	0.31864	0.61879		1.67379	0.99531	0.00356	0.000810641	0.000199661	1.00275e-05	0.000104085	1.07624e-06	4.90944e-06	4.32825e-10							1.67379	0.0198	0.03469	0.15834	0.78717		1.67379	0.98539	0.00251	0.01132	7.33107e-05	5.89436e-05	0.000612389	6.50119e-06	3.0054e-05	3.73825e-07
		1.68619	0.02185	0.03777	0.31239	0.628		1.68619	0.9952	0.00363	0.000827277	0.00020783	1.15066e-05	0.000119683	1.30978e-06	6.14925e-06	7.81583e-10							1.68619	0.01825	0.03364	0.15526	0.79285		1.68619	0.985	0.00256	0.01155	7.63621e-05	6.75289e-05	0.000703004	7.89261e-06	3.75361e-05	6.04659e-07
		1.69858	0.02019	0.03668	0.30628	0.63685		1.69858	0.99509	0.00369	0.000843998	0.000216197	1.31675e-05	0.000137226	1.58671e-06	7.65966e-06	1.37435e-09							1.69858	0.01685	0.03263	0.15227	0.79825		1.69858	0.98461	0.0026	0.01177	7.94923e-05	7.71555e-05	0.000804798	9.539e-06	4.66249e-05	9.60175e-07
		1.71098	0.01868	0.03564	0.30031	0.64537		1.71098	0.99497	0.00376	0.000860822	0.000224773	1.50276e-05	0.000156912	1.91383e-06	9.49007e-06	2.35844e-09							1.71098	0.01557	0.03167	0.14939	0.80337		1.71098	0.98419	0.00265	0.012	8.26957e-05	8.79179e-05	0.000918797	1.14792e-05	5.76096e-05	1.49872e-06
		1.72338	0.0173	0.03464	0.29449	0.65357		1.72338	0.99486	0.00382	0.000877728	0.00023355	1.71057e-05	0.000178945	2.29867e-06	1.16976e-05	3.95688e-09							1.72338	0.01441	0.03075	0.14659	0.80825		1.72338	0.98376	0.00269	0.01223	8.59768e-05	9.99228e-05	0.00105	1.37563e-05	7.08242e-05	2.30199e-06
		1.73578	0.01604	0.03367	0.28883	0.66146		1.73578	0.99473	0.00389	0.000894688	0.000242526	1.94216e-05	0.000203544	2.74949e-06	1.43478e-05	6.50173e-09							1.73578	0.01335	0.02987	0.14388	0.8129		1.73578	0.9833	0.00274	0.01246	8.93308e-05	0.000113281	0.00119	1.64192e-05	8.66459e-05	3.48266e-06
		1.74818	0.01489	0.03274	0.2833	0.66906		1.74818	0.99461	0.00395	0.000911765	0.000251702	2.19973e-05	0.000230941	3.27603e-06	1.75151e-05	1.0478e-08							1.74818	0.01239	0.02903	0.14126	0.81733		1.74818	0.98283	0.00278	0.01269	9.27604e-05	0.000128116	0.00135	1.95206e-05	0.000105506	5.19469e-06
		1.76058	0.01384	0.03186	0.27794	0.67637		1.76058	0.99448	0.00402	0.000928883	0.000261084	2.48552e-05	0.000261395	3.88858e-06	2.12839e-05	1.65835e-08							1.76058	0.0115	0.02823	0.13872	0.82155		1.76058	0.98233	0.00283	0.01292	9.62668e-05	0.00014454	0.00152	2.31214e-05	0.000127898	7.64568e-06
		1.77297	0.01287	0.031	0.27271	0.68342		1.77297	0.99434	0.00409	0.000946083	0.00027066	2.80183e-05	0.000295174	4.59856e-06	2.57491e-05	2.58071e-08							1.77297	0.0107	0.02746	0.13626	0.82559		1.77297	0.9818	0.00287	0.01316	9.98387e-05	0.000162699	0.00172	2.72849e-05	0.000154354	1.11112e-05
		1.78537	0.01199	0.03018	0.26764	0.6902		1.78537	0.9942	0.00415	0.000963366	0.000280452	3.15147e-05	0.000332548	5.41903e-06	3.10199e-05	3.95347e-08							1.78537	0.00996	0.02672	0.13387	0.82944		1.78537	0.98125	0.00292	0.01339	0.000103504	0.000182742	0.00193	3.20892e-05	0.000185521	1.59583e-05
		1.79777	0.01117	0.02938	0.26271	0.69673		1.79777	0.99406	0.00422	0.000980708	0.000290446	3.53697e-05	0.000373822	6.36397e-06	3.72155e-05	5.96724e-08							1.79777	0.00929	0.02602	0.13157	0.83313		1.79777	0.98066	0.00296	0.01362	0.000107228	0.000204791	0.00217	3.76086e-05	0.000222055	2.26616e-05
		1.81017	0.01043	0.02862	0.25791	0.70304		1.81017	0.99391	0.00428	0.000998096	0.000300637	3.96118e-05	0.000419322	7.44883e-06	4.4473e-05	8.88191e-08							1.81017	0.00866	0.02534	0.12934	0.83666		1.81017	0.98003	0.00301	0.01385	0.000111031	0.000229021	0.00243	4.39334e-05	0.000264759	3.18381e-05
		1.82257	0.00974	0.02789	0.25324	0.70912		1.82257	0.99375	0.00435	0.00102	0.000311028	4.42711e-05	0.000469364	8.6909e-06	5.2944e-05	1.30485e-07							1.82257	0.00809	0.02469	0.12718	0.84003		1.82257	0.97937	0.00305	0.01409	0.0001149	0.000255583	0.00271	5.11565e-05	0.000314472	4.42779e-05
		1.83497	0.00911	0.02719	0.24872	0.71498		1.83497	0.99358	0.00442	0.00103	0.000321619	4.93798e-05	0.000524312	1.01083e-05	6.2795e-05	1.89335e-07							1.83497	0.00757	0.02408	0.12508	0.84327		1.83497	0.97867	0.0031	0.01432	0.000118844	0.000284648	0.00302	5.93848e-05	0.000372149	6.09845e-05
		1.84736	0.00852	0.02651	0.24433	0.72064		1.84736	0.99341	0.00448	0.00105	0.000332407	5.49689e-05	0.000584514	1.17218e-05	7.42113e-05	2.71519e-07							1.84736	0.00709	0.02348	0.12306	0.84637		1.84736	0.97791	0.00314	0.01455	0.000122857	0.000316407	0.00337	6.87262e-05	0.000438844	8.32363e-05
		1.85976	0.00799	0.02586	0.24005	0.7261		1.85976	0.99323	0.00455	0.00107	0.000343424	6.10797e-05	0.000650422	1.3554e-05	8.74054e-05	3.85131e-07							1.85976	0.00664	0.02291	0.12109	0.84936		1.85976	0.9771	0.00318	0.01478	0.00012694	0.000351031	0.00374	7.9307e-05	0.000515707	0.000112607
		1.87216	0.00749	0.02524	0.2359	0.73138		1.87216	0.99304	0.00461	0.00109	0.000354615	6.77396e-05	0.000722347	1.56271e-05	0.000102598	5.40533e-07							1.87216	0.00623	0.02236	0.11919	0.85221		1.87216	0.97624	0.00323	0.01502	0.00013109	0.000388704	0.00415	9.12602e-05	0.000604032	0.000151075
		1.88456	0.00703	0.02463	0.23188	0.73646		1.88456	0.99284	0.00468	0.0011	0.000365997	7.49872e-05	0.000800757	1.79673e-05	0.000120043	7.51116e-07							1.88456	0.00585	0.02184	0.11734	0.85497		1.88456	0.97531	0.00327	0.01525	0.000135299	0.000429656	0.00459	0.000104719	0.000705168	0.000201065
		1.89696	0.0066	0.02405	0.22797	0.74137		1.89696	0.99262	0.00475	0.00112	0.0003776	8.28763e-05	0.000886155	2.06046e-05	0.00014002	1.03391e-06							1.89696	0.0055	0.02133	0.11556	0.85761		1.89696	0.97431	0.00332	0.01548	0.000139577	0.000474051	0.00507	0.000119846	0.000820666	0.000265558
		1.90936	0.00621	0.02349	0.22417	0.74612		1.90936	0.9924	0.00481	0.00114	0.000389391	9.14306e-05	0.000978919	2.35672e-05	0.000162818	1.41042e-06							1.90936	0.00517	0.02085	0.11382	0.86015		1.90936	0.97324	0.00336	0.01571	0.000143916	0.000522122	0.00559	0.000136796	0.000952141	0.000348212
		1.92175	0.00584	0.02295	0.22047	0.75073		1.92175	0.99216	0.00488	0.00116	0.000401376	0.000100701	0.00108	2.68876e-05	0.00018877	1.90752e-06							1.92175	0.00487	0.02038	0.11214	0.86261		1.92175	0.97207	0.0034	0.01594	0.000148312	0.000574078	0.00616	0.000155745	0.0011	0.000453363
		1.93415	0.00551	0.02244	0.2169	0.75516		1.93415	0.99191	0.00495	0.00117	0.000413543	0.000110733	0.00119	3.06023e-05	0.00021824	2.55879e-06							1.93415	0.00459	0.01993	0.11051	0.86496		1.93415	0.97081	0.00344	0.01616	0.00015276	0.000630138	0.00677	0.000176874	0.00127	0.000586312
		1.94655	0.00519	0.02193	0.21341	0.75946		1.94655	0.99165	0.00501	0.00119	0.000425945	0.000121573	0.00131	3.47465e-05	0.000251614	3.40568e-06							1.94655	0.00433	0.0195	0.10893	0.86724		1.94655	0.96944	0.00349	0.01639	0.000157264	0.000690509	0.00743	0.000200379	0.00146	0.000753351
		1.95895	0.0049	0.02145	0.21003	0.76362		1.95895	0.99137	0.00508	0.00121	0.000438516	0.000133267	0.00143	3.93644e-05	0.000289325	4.49916e-06							1.95895	0.00409	0.01908	0.10739	0.86943		1.95895	0.96795	0.00353	0.01661	0.000161804	0.000755448	0.00813	0.00022648	0.00168	0.000961945
		1.97135	0.00462	0.02099	0.20674	0.76765		1.97135	0.99108	0.00515	0.00123	0.000451259	0.000145869	0.00157	4.44931e-05	0.000331798	5.90123e-06							1.97135	0.00387	0.01868	0.1059	0.87154		1.97135	0.96632	0.00357	0.01683	0.000166396	0.000825153	0.00889	0.00025537	0.00192	0.00122
		1.98375	0.00437	0.02054	0.20355	0.77154		1.98375	0.99076	0.00521	0.00125	0.000464204	0.000159421	0.00172	5.0178e-05	0.000379535	7.6871e-06							1.98375	0.00366	0.0183	0.10446	0.87359		1.98375	0.96454	0.00361	0.01705	0.000171031	0.000899847	0.00971	0.000287295	0.00219	0.00154
		1.99615	0.00413	0.02011	0.20045	0.77531		1.99615	0.99043	0.00528	0.00126	0.000477343	0.000173987	0.00188	5.64738e-05	0.00043309	9.94784e-06							1.99615	0.00346	0.01793	0.10305	0.87556		1.99615	0.9626	0.00365	0.01726	0.000175683	0.000979704	0.01058	0.000322457	0.00249	0.00193
		2.00854	0.00391	0.01969	0.19742	0.77897		2.00854	0.99007	0.00534	0.00128	0.000490653	0.000189617	0.00205	6.3426e-05	0.000493003	1.27928e-05							2.00854	0.00328	0.01757	0.10168	0.87747		2.00854	0.96048	0.00369	0.01747	0.000180373	0.00107	0.01152	0.000361161	0.00282	0.00241
		2.02094	0.00371	0.01928	0.19449	0.78252		2.02094	0.9897	0.00541	0.0013	0.00050415	0.000206364	0.00223	7.10904e-05	0.000559898	1.63522e-05							2.02094	0.00311	0.01722	0.10036	0.87931		2.02094	0.95814	0.00373	0.01768	0.00018507	0.00116	0.01252	0.000403599	0.0032	0.003
		2.03334	0.00351	0.01889	0.19164	0.78595		2.03334	0.9893	0.00548	0.00132	0.000517823	0.000224299	0.00243	7.9526e-05	0.000634434	2.07789e-05							2.03334	0.00295	0.01689	0.09906	0.8811		2.03334	0.95557	0.00376	0.01788	0.000189773	0.00125	0.01358	0.000450055	0.00361	0.0037
		2.04574	0.00333	0.01852	0.18887	0.78928		2.04574	0.98888	0.00554	0.00134	0.000531661	0.00024347	0.00264	8.87916e-05	0.000717303	2.62594e-05							2.04574	0.0028	0.01656	0.09781	0.88282		2.04574	0.95275	0.0038	0.01808	0.000194484	0.00136	0.01471	0.000500787	0.00407	0.00455
		2.05814	0.00317	0.01815	0.18618	0.7925		2.05814	0.98842	0.00561	0.00135	0.00054569	0.000263929	0.00287	9.89525e-05	0.000809263	3.30049e-05							2.05814	0.00266	0.01625	0.09659	0.88449		2.05814	0.94964	0.00383	0.01826	0.00019918	0.00146	0.01591	0.00055606	0.00457	0.00557
		2.07054	0.00301	0.0178	0.18354	0.79565		2.07054	0.98794	0.00567	0.00137	0.000559889	0.00028577	0.00311	0.000110081	0.000911094	4.12693e-05							2.07054	0.00253	0.01595	0.0954	0.88611		2.07054	0.94621	0.00386	0.01845	0.000203846	0.00158	0.01718	0.000616125	0.00513	0.00678
		2.08293	0.00286	0.01746	0.18099	0.79869		2.08293	0.98743	0.00574	0.00139	0.000574244	0.000309022	0.00336	0.000122234	0.00102	5.13456e-05							2.08293	0.00241	0.01566	0.09425	0.88768		2.08293	0.94243	0.00389	0.01862	0.000208471	0.0017	0.01852	0.000681242	0.00574	0.00821
		2.09533	0.00272	0.01713	0.1785	0.80165		2.09533	0.98689	0.0058	0.00141	0.000588748	0.000333759	0.00363	0.00013549	0.00115	6.35718e-05							2.09533	0.0023	0.01538	0.09313	0.88919		2.09533	0.93826	0.00392	0.01878	0.000213039	0.00183	0.01993	0.000751614	0.0064	0.00991
		2.10773	0.00259	0.01681	0.17608	0.80451		2.10773	0.98631	0.00587	0.00143	0.000603424	0.00036006	0.00392	0.000149935	0.00128	7.83451e-05							2.10773	0.00219	0.01511	0.09204	0.89067		2.10773	0.93366	0.00395	0.01894	0.000217537	0.00196	0.02142	0.000827538	0.00713	0.0119
		2.12013	0.00247	0.0165	0.17373	0.8073		2.12013	0.98569	0.00593	0.00144	0.000618215	0.000387977	0.00423	0.000165649	0.00143	9.61197e-05							2.12013	0.00209	0.01485	0.09097	0.8921		2.12013	0.92859	0.00397	0.01908	0.000221937	0.00211	0.02298	0.000909167	0.00791	0.01424
		2.13253	0.00235	0.0162	0.17143	0.81001		2.13253	0.98504	0.00599	0.00146	0.000633241	0.0004176	0.00456	0.000182715	0.0016	0.000117417							2.13253	0.00199	0.01459	0.08993	0.89348		2.13253	0.92299	0.00399	0.0192	0.000226227	0.00225	0.02461	0.000996726	0.00877	0.01696
		2.14493	0.00224	0.01592	0.1692	0.81264		2.14493	0.98434	0.00606	0.00148	0.000648357	0.000448986	0.00491	0.000201216	0.00178	0.000142835							2.14493	0.0019	0.01434	0.08892	0.89483		2.14493	0.91683	0.00401	0.01932	0.000230385	0.00241	0.02631	0.00109	0.00969	0.02011
		2.15732	0.00214	0.01564	0.16703	0.8152		2.15732	0.98359	0.00612	0.0015	0.000663645	0.000482183	0.00527	0.000221251	0.00198	0.000173045							2.15732	0.00182	0.01411	0.08794	0.89614		2.15732	0.91005	0.00403	0.01942	0.000234367	0.00257	0.02808	0.00119	0.01069	0.02375
		2.16972	0.00205	0.01536	0.16491	0.81769		2.16972	0.9828	0.00618	0.00151	0.000679012	0.000517277	0.00566	0.0002429	0.00219	0.000208812							2.16972	0.00174	0.01387	0.08698	0.89741		2.16972	0.9026	0.00404	0.01949	0.000238152	0.00273	0.02991	0.0013	0.01176	0.02793
		2.18212	0.00195	0.0151	0.16284	0.82011		2.18212	0.98196	0.00625	0.00153	0.00069453	0.00055437	0.00607	0.000266284	0.00243	0.000251024							2.18212	0.00166	0.01365	0.08605	0.89864		2.18212	0.89442	0.00405	0.01956	0.000241732	0.0029	0.03181	0.00141	0.0129	0.03272
		2.19452	0.00187	0.01485	0.16083	0.82246		2.19452	0.98106	0.00631	0.00155	0.000710175	0.000593523	0.00651	0.000291493	0.00268	0.000300651							2.19452	0.00159	0.01343	0.08513	0.89985		2.19452	0.88547	0.00405	0.01959	0.000245056	0.00308	0.03375	0.00153	0.01412	0.03817
		2.20692	0.00179	0.0146	0.15886	0.82475		2.20692	0.9801	0.00637	0.00157	0.00072592	0.00063474	0.00697	0.000318619	0.00296	0.000358812							2.20692	0.00152	0.01322	0.08424	0.90101		2.20692	0.87569	0.00405	0.01961	0.000248106	0.00326	0.03575	0.00165	0.01541	0.04435
		2.21932	0.00171	0.01436	0.15694	0.82699		2.21932	0.97908	0.00643	0.00158	0.000741779	0.000678162	0.00745	0.000347808	0.00326	0.000426708							2.21932	0.00146	0.01302	0.08338	0.90215		2.21932	0.86502	0.00404	0.0196	0.000250822	0.00344	0.03778	0.00178	0.01678	0.05131
		2.23172	0.00164	0.01412	0.15507	0.82916		2.23172	0.978	0.00649	0.0016	0.000757725	0.000723857	0.00796	0.000379133	0.00359	0.000505771							2.23172	0.0014	0.01282	0.08253	0.90326		2.23172	0.85343	0.00403	0.01956	0.000253204	0.00362	0.03984	0.00192	0.01822	0.05913
		2.24411	0.00157	0.0139	0.15326	0.83127		2.24411	0.97685	0.00655	0.00162	0.000773766	0.000771859	0.00849	0.000412737	0.00394	0.000597504							2.24411	0.00134	0.01262	0.0817	0.90433		2.24411	0.84086	0.00401	0.0195	0.000255191	0.00381	0.04193	0.00206	0.01972	0.06786
		2.25651	0.00151	0.01368	0.15148	0.83334		2.25651	0.97562	0.00661	0.00163	0.000789906	0.000822278	0.00905	0.000448717	0.00432	0.000703638							2.25651	0.00129	0.01244	0.0809	0.90538		2.25651	0.82729	0.00398	0.0194	0.000256759	0.004	0.04401	0.0022	0.0213	0.07755
		2.26891	0.00145	0.01346	0.14975	0.83535		2.26891	0.97431	0.00667	0.00165	0.000806094	0.000875148	0.00964	0.000487188	0.00474	0.000826053							2.26891	0.00124	0.01225	0.08011	0.9064		2.26891	0.8127	0.00395	0.01928	0.000257866	0.00418	0.04609	0.00235	0.02293	0.08826
		2.28131	0.00139	0.01326	0.14805	0.8373		2.28131	0.97293	0.00672	0.00166	0.000822357	0.000930556	0.01026	0.000528302	0.00518	0.000966849							2.28131	0.00119	0.01208	0.07934	0.9074		2.28131	0.79705	0.00392	0.01912	0.000258494	0.00437	0.04815	0.0025	0.02461	0.10003
		2.29371	0.00133	0.01305	0.14641	0.8392		2.29371	0.97145	0.00678	0.00168	0.000838667	0.000988566	0.01091	0.000572146	0.00566	0.00113							2.29371	0.00114	0.01191	0.07858	0.90837		2.29371	0.78034	0.00387	0.01892	0.000258626	0.00455	0.05018	0.00265	0.02633	0.11289
		2.30611	0.00128	0.01286	0.14479	0.84107		2.30611	0.96988	0.00683	0.0017	0.000855005	0.00105	0.01159	0.000618864	0.00617	0.00131							2.30611	0.0011	0.01174	0.07785	0.90931		2.30611	0.76259	0.00382	0.0187	0.000258209	0.00472	0.05215	0.00281	0.02809	0.12687
		2.3185	0.00123	0.01267	0.14321	0.84289		2.3185	0.96821	0.00689	0.00171	0.000871385	0.00111	0.01229	0.0006686	0.00672	0.00152							2.3185	0.00106	0.01158	0.07714	0.91023		2.3185	0.74381	0.00376	0.01843	0.000257245	0.00489	0.05404	0.00296	0.02987	0.14197
		2.3309	0.00118	0.01248	0.14168	0.84466		2.3309	0.96644	0.00694	0.00173	0.000887769	0.00118	0.01303	0.000721448	0.0073	0.00176							2.3309	0.00102	0.01142	0.07644	0.91113		2.3309	0.72404	0.0037	0.01814	0.000255704	0.00505	0.05586	0.00312	0.03166	0.15818
		2.3433	0.00114	0.0123	0.14017	0.84639		2.3433	0.96456	0.00699	0.00174	0.000904144	0.00125	0.01381	0.000777522	0.00793	0.00203							2.3433	0.000980515	0.01126	0.07575	0.91201		2.3433	0.70334	0.00363	0.01781	0.000253588	0.0052	0.05757	0.00327	0.03345	0.17549
		2.3557	0.0011	0.01213	0.1387	0.84808		2.3557	0.96256	0.00704	0.00176	0.000920506	0.00132	0.01461	0.000837003	0.0086	0.00234							2.3557	0.000944802	0.01111	0.07508	0.91286		2.3557	0.68177	0.00355	0.01744	0.000250898	0.00534	0.05916	0.00342	0.03522	0.19385
		2.3681	0.00106	0.01196	0.13727	0.84972		2.3681	0.96044	0.00709	0.00177	0.000936872	0.00139	0.01545	0.000900082	0.00932	0.00269							2.3681	0.000910848	0.01097	0.07442	0.9137		2.3681	0.65942	0.00346	0.01704	0.000247635	0.00547	0.06062	0.00356	0.03697	0.21321
		2.3805	0.00102	0.01179	0.13587	0.85133		2.3805	0.95819	0.00714	0.00179	0.000953118	0.00147	0.01632	0.000966663	0.01008	0.00308							2.3805	0.000878516	0.01083	0.07379	0.91451		2.3805	0.63638	0.00337	0.01662	0.000243822	0.00558	0.06193	0.00369	0.03867	0.23352
		2.39289	0.000980235	0.01163	0.1345	0.8529		2.39289	0.9558	0.00719	0.0018	0.000969429	0.00155	0.01723	0.00104	0.0109	0.00352							2.39289	0.000847642	0.01069	0.07316	0.91531		2.39289	0.61277	0.00328	0.01616	0.000239477	0.00568	0.06308	0.00382	0.04031	0.25465
		2.40529	0.000945263	0.01147	0.13315	0.85443		2.40529	0.95327	0.00724	0.00181	0.000985513	0.00164	0.01817	0.00111	0.01176	0.00401							2.40529	0.00081824	0.01055	0.07254	0.91609		2.40529	0.58869	0.00318	0.01569	0.000234629	0.00577	0.06406	0.00395	0.04188	0.27655
		2.41769	0.00091195	0.01132	0.13184	0.85593		2.41769	0.95059	0.00728	0.00183	0.001	0.00172	0.01915	0.00119	0.01267	0.00456							2.41769	0.000790185	0.01042	0.07194	0.91685		2.41769	0.5643	0.00307	0.01519	0.000229322	0.00584	0.06487	0.00406	0.04338	0.29907
		2.43009	0.000880173	0.01117	0.13056	0.85739		2.43009	0.94775	0.00732	0.00184	0.00102	0.00181	0.02016	0.00127	0.01364	0.00518							2.43009	0.000763411	0.01029	0.07135	0.91759		2.43009	0.53971	0.00296	0.01467	0.00022358	0.00589	0.0655	0.00416	0.04477	0.32211
		2.44249	0.000849857	0.01102	0.1293	0.85883		2.44249	0.94474	0.00736	0.00185	0.00103	0.00191	0.02121	0.00136	0.01467	0.00586							2.44249	0.000737851	0.01017	0.07078	0.91831		2.44249	0.51507	0.00285	0.01414	0.000217468	0.00593	0.06594	0.00425	0.04607	0.34553
		2.45489	0.000820927	0.01088	0.12808	0.86022		2.45489	0.94156	0.0074	0.00186	0.00105	0.002	0.02229	0.00145	0.01576	0.00662							2.45489	0.000713406	0.01005	0.07021	0.91903		2.45489	0.4905	0.00274	0.01359	0.000211024	0.00595	0.06621	0.00433	0.04725	0.36921
		2.46729	0.000793276	0.01074	0.12687	0.8616		2.46729	0.93819	0.00744	0.00187	0.00106	0.0021	0.02341	0.00154	0.0169	0.00747							2.46729	0.000690044	0.00993	0.06966	0.91972		2.46729	0.46613	0.00263	0.01304	0.000204315	0.00595	0.0663	0.0044	0.04832	0.39302
		2.47968	0.000766881	0.0106	0.1257	0.86293		2.47968	0.93464	0.00747	0.00189	0.00108	0.0022	0.02457	0.00164	0.01811	0.0084							2.47968	0.00066772	0.00981	0.06912	0.9204		2.47968	0.4421	0.00251	0.01249	0.000197383	0.00594	0.06621	0.00446	0.04927	0.41683
		2.49208	0.00074162	0.01047	0.12454	0.86424		2.49208	0.93088	0.00751	0.0019	0.00109	0.00231	0.02576	0.00175	0.01938	0.00943							2.49208	0.000646362	0.0097	0.06859	0.92106		2.49208	0.41851	0.0024	0.01193	0.000190288	0.00591	0.06596	0.00451	0.05009	0.4405
		2.50448	0.00071749	0.01034	0.12341	0.86552		2.50448	0.92691	0.00754	0.00191	0.00111	0.00242	0.02698	0.00186	0.02072	0.01056							2.50448	0.000625913	0.00959	0.06807	0.92171		2.50448	0.39546	0.00229	0.01138	0.000183085	0.00587	0.06555	0.00454	0.05079	0.46393
		2.51688	0.000694382	0.01022	0.12231	0.86677		2.51688	0.92273	0.00756	0.00191	0.00112	0.00253	0.02824	0.00197	0.02212	0.01181							2.51688	0.00060634	0.00948	0.06756	0.92235		2.51688	0.37305	0.00217	0.01083	0.000175824	0.00582	0.06499	0.00457	0.05137	0.48702
		2.52928	0.000672274	0.0101	0.12123	0.86801		2.52928	0.91832	0.00759	0.00192	0.00114	0.00264	0.02953	0.00209	0.02359	0.01317							2.52928	0.000587597	0.00938	0.06707	0.92297		2.52928	0.35136	0.00206	0.0103	0.000168556	0.00576	0.0643	0.00458	0.05183	0.50965
		2.54168	0.000651103	0.00998	0.12017	0.8692		2.54168	0.91367	0.00761	0.00193	0.00115	0.00276	0.03086	0.00221	0.02513	0.01467							2.54168	0.000569596	0.00927	0.06657	0.92359		2.54168	0.33044	0.00196	0.00977	0.000161314	0.00568	0.06349	0.00458	0.05216	0.53176
		2.55407	0.000630844	0.00986	0.11914	0.87037		2.55407	0.90879	0.00763	0.00194	0.00117	0.00288	0.03221	0.00234	0.02674	0.0163							2.55407	0.000552356	0.00917	0.06609	0.92418		2.55407	0.31033	0.00185	0.00926	0.000154156	0.0056	0.06257	0.00458	0.05239	0.55327
		2.56647	0.000611391	0.00974	0.11812	0.87153		2.56647	0.90365	0.00765	0.00194	0.00118	0.003	0.0336	0.00248	0.02842	0.01808							2.56647	0.000535838	0.00907	0.06562	0.92477		2.56647	0.29111	0.00175	0.00876	0.00014711	0.0055	0.06155	0.00456	0.05251	0.57411
		2.57887	0.000592733	0.00963	0.11712	0.87266		2.57887	0.89825	0.00766	0.00195	0.00119	0.00313	0.03502	0.00261	0.03017	0.02002							2.57887	0.00051998	0.00898	0.06516	0.92534		2.57887	0.27278	0.00165	0.00828	0.000140205	0.0054	0.06045	0.00454	0.05252	0.59423
		2.59127	0.000574861	0.00952	0.11614	0.87376		2.59127	0.89258	0.00767	0.00195	0.0012	0.00326	0.03646	0.00276	0.03199	0.02213							2.59127	0.000504768	0.00888	0.06471	0.9259		2.59127	0.25534	0.00156	0.00782	0.000133469	0.00529	0.05928	0.00451	0.05245	0.61362
		2.60367	0.000557752	0.00942	0.11519	0.87484		2.60367	0.88664	0.00768	0.00196	0.00121	0.00339	0.03793	0.0029	0.03389	0.0244							2.60367	0.000490138	0.00879	0.06427	0.92645		2.60367	0.23881	0.00147	0.00738	0.000126928	0.00518	0.05805	0.00447	0.05229	0.63223
		2.61607	0.000541273	0.00931	0.11425	0.8759		2.61607	0.88041	0.00769	0.00196	0.00123	0.00352	0.03943	0.00306	0.03585	0.02687							2.61607	0.000476114	0.0087	0.06383	0.92699		2.61607	0.22318	0.00138	0.00695	0.000120595	0.00506	0.05677	0.00442	0.05204	0.65006
		2.62846	0.000525465	0.00921	0.11332	0.87694		2.62846	0.8739	0.00769	0.00196	0.00124	0.00365	0.04094	0.00321	0.03789	0.02953							2.62846	0.00046261	0.00861	0.0634	0.92752		2.62846	0.20844	0.0013	0.00655	0.000114482	0.00494	0.05546	0.00437	0.05173	0.66708
		2.64086	0.000510272	0.00911	0.11242	0.87796		2.64086	0.86708	0.00768	0.00196	0.00125	0.00379	0.04248	0.00337	0.03999	0.03239							2.64086	0.000449615	0.00853	0.06298	0.92804		2.64086	0.19456	0.00123	0.00616	0.000108606	0.00482	0.05412	0.00432	0.05135	0.68332
		2.65326	0.000495662	0.00901	0.11153	0.87896		2.65326	0.85997	0.00768	0.00196	0.00126	0.00392	0.04404	0.00354	0.04216	0.03547							2.65326	0.000437145	0.00845	0.06257	0.92855		2.65326	0.18153	0.00115	0.0058	0.000102968	0.0047	0.05277	0.00426	0.05092	0.69876
		2.66566	0.000481636	0.00892	0.11066	0.87994		2.66566	0.85255	0.00767	0.00196	0.00126	0.00406	0.04561	0.00371	0.04441	0.03877							2.66566	0.00042516	0.00836	0.06216	0.92905		2.66566	0.16931	0.00108	0.00545	9.75782e-05	0.00458	0.05141	0.0042	0.05043	0.71344
		2.67806	0.000468155	0.00883	0.10981	0.8809		2.67806	0.84482	0.00765	0.00196	0.00127	0.0042	0.04719	0.00388	0.04671	0.04231							2.67806	0.000413586	0.00828	0.06177	0.92954		2.67806	0.15788	0.00102	0.00513	9.24295e-05	0.00445	0.05004	0.00414	0.04991	0.72735
		2.69046	0.00045518	0.00873	0.10897	0.88184		2.69046	0.83678	0.00764	0.00196	0.00128	0.00434	0.04879	0.00406	0.04908	0.04608							2.69046	0.000402461	0.0082	0.06137	0.93002		2.69046	0.14717	0.000954367	0.00482	8.75159e-05	0.00433	0.04868	0.00407	0.04934	0.74055
		2.70286	0.000442685	0.00864	0.10815	0.88276		2.70286	0.82842	0.00761	0.00195	0.00129	0.00448	0.05039	0.00424	0.05151	0.05011							2.70286	0.000391771	0.00813	0.06099	0.93049		2.70286	0.13719	0.000896017	0.00453	8.28478e-05	0.00421	0.04733	0.004	0.04874	0.75303
		2.71525	0.000430666	0.00856	0.10734	0.88367		2.71525	0.81974	0.00759	0.00195	0.00129	0.00462	0.05199	0.00442	0.05401	0.05439							2.71525	0.000381442	0.00805	0.06062	0.93095		2.71525	0.12788	0.000841075	0.00425	7.84101e-05	0.00409	0.04599	0.00393	0.04812	0.76483
		2.72765	0.000419086	0.00847	0.10655	0.88456		2.72765	0.81075	0.00756	0.00194	0.0013	0.00476	0.0536	0.00461	0.05655	0.05894							2.72765	0.000371507	0.00798	0.06024	0.93141		2.72765	0.11919	0.000789469	0.004	7.42027e-05	0.00397	0.04467	0.00386	0.04746	0.77599
		2.74005	0.000407936	0.00839	0.10577	0.88543		2.74005	0.80145	0.00752	0.00194	0.0013	0.0049	0.0552	0.0048	0.05914	0.06376							2.74005	0.000361912	0.0079	0.05988	0.93185		2.74005	0.11111	0.00074106	0.00375	7.02176e-05	0.00385	0.04338	0.00379	0.0468	0.78651
		2.75245	0.00039718	0.00831	0.10501	0.88629		2.75245	0.79182	0.00748	0.00193	0.0013	0.00504	0.0568	0.00499	0.06178	0.06886							2.75245	0.000352673	0.00783	0.05952	0.93229		2.75245	0.10359	0.000695658	0.00353	6.64444e-05	0.00374	0.0421	0.00372	0.04612	0.79645
		2.76485	0.000386827	0.00823	0.10426	0.88713		2.76485	0.7819	0.00744	0.00192	0.00131	0.00518	0.05838	0.00518	0.06446	0.07424							2.76485	0.000343754	0.00776	0.05917	0.93272		2.76485	0.09659	0.000653116	0.00331	6.28749e-05	0.00362	0.04086	0.00364	0.04543	0.80582
		2.77725	0.000376835	0.00815	0.10352	0.88795		2.77725	0.77166	0.00739	0.00191	0.00131	0.00532	0.05995	0.00538	0.06719	0.0799							2.77725	0.000335147	0.0077	0.05883	0.93314		2.77725	0.09009	0.000613281	0.00311	5.95047e-05	0.00352	0.03965	0.00357	0.04473	0.81466
		2.78964	0.000367199	0.00807	0.1028	0.88876		2.78964	0.76113	0.00734	0.0019	0.00131	0.00545	0.0615	0.00557	0.06994	0.08586							2.78964	0.00032684	0.00763	0.05848	0.93356		2.78964	0.08405	0.000575987	0.00293	5.63219e-05	0.00341	0.03846	0.0035	0.04403	0.82299
		2.80204	0.000357902	0.00799	0.10209	0.88956		2.80204	0.75031	0.00728	0.00188	0.00131	0.00559	0.06303	0.00577	0.07273	0.09211							2.80204	0.000318826	0.00756	0.05815	0.93397		2.80204	0.07843	0.000541086	0.00275	5.33182e-05	0.00331	0.03731	0.00343	0.04333	0.83085
		2.81444	0.000348927	0.00792	0.10139	0.89034		2.81444	0.7392	0.00722	0.00187	0.00131	0.00572	0.06454	0.00597	0.07553	0.09865							2.81444	0.000311084	0.0075	0.05782	0.93437		2.81444	0.07322	0.000508442	0.00259	5.04852e-05	0.0032	0.03619	0.00336	0.04263	0.83825
		2.82684	0.000340271	0.00785	0.1007	0.89111		2.82684	0.72783	0.00716	0.00185	0.0013	0.00584	0.06601	0.00616	0.07835	0.10548							2.82684	0.0003036	0.00744	0.0575	0.93476		2.82684	0.06837	0.00047791	0.00243	4.78134e-05	0.00311	0.0351	0.00329	0.04193	0.84524
		2.83924	0.000331912	0.00778	0.10003	0.89186		2.83924	0.7162	0.00709	0.00184	0.0013	0.00597	0.06746	0.00636	0.08118	0.11261							2.83924	0.000296366	0.00737	0.05718	0.93515		2.83924	0.06387	0.000449357	0.00229	4.52937e-05	0.00301	0.03405	0.00322	0.04123	0.85183
		2.85164	0.00032383	0.00771	0.09936	0.89261		2.85164	0.70432	0.00702	0.00182	0.0013	0.00609	0.06886	0.00655	0.08402	0.12002							2.85164	0.00028938	0.00731	0.05687	0.93553		2.85164	0.05969	0.000422653	0.00216	4.29193e-05	0.00292	0.03302	0.00316	0.04054	0.85804
		2.86403	0.000316013	0.00764	0.09871	0.89333		2.86403	0.69221	0.00694	0.0018	0.00129	0.00621	0.07023	0.00675	0.08685	0.12771							2.86403	0.000282611	0.00725	0.05656	0.9359		2.86403	0.05581	0.000397702	0.00203	4.0683e-05	0.00283	0.03203	0.00309	0.03986	0.8639
		2.87643	0.000308485	0.00757	0.09808	0.89404		2.87643	0.67989	0.00686	0.00178	0.00129	0.00632	0.07155	0.00694	0.08968	0.13569							2.87643	0.000276086	0.0072	0.05626	0.93627		2.87643	0.05221	0.000374366	0.00191	3.85757e-05	0.00275	0.03108	0.00303	0.03919	0.86943
		2.88883	0.000301168	0.0075	0.09744	0.89476		2.88883	0.66737	0.00678	0.00176	0.00128	0.00644	0.07283	0.00713	0.09249	0.14394							2.88883	0.000269758	0.00714	0.05596	0.93663		2.88883	0.04885	0.000352529	0.0018	3.65883e-05	0.00266	0.03015	0.00296	0.03852	0.87465
		2.90123	0.000294117	0.00744	0.09682	0.89544		2.90123	0.65466	0.00669	0.00174	0.00127	0.00654	0.07405	0.00732	0.09527	0.15245							2.90123	0.000263627	0.00708	0.05567	0.93699		2.90123	0.04575	0.000332124	0.0017	3.47177e-05	0.00258	0.02926	0.0029	0.03787	0.87958
		2.91363	0.000287304	0.00738	0.09622	0.89612		2.91363	0.6418	0.0066	0.00172	0.00126	0.00664	0.07522	0.0075	0.09804	0.16122							2.91363	0.000257702	0.00703	0.05538	0.93734		2.91363	0.04285	0.000313012	0.0016	3.29543e-05	0.00251	0.02839	0.00284	0.03722	0.88424
		2.92603	0.000280692	0.00731	0.09561	0.89679		2.92603	0.6288	0.0065	0.00169	0.00125	0.00674	0.07634	0.00768	0.10077	0.17024							2.92603	0.000251966	0.00697	0.05509	0.93768		2.92603	0.04016	0.000295146	0.00151	3.12914e-05	0.00243	0.02756	0.00278	0.03659	0.88865
		2.93843	0.000274292	0.00725	0.09502	0.89745		2.93843	0.61567	0.00641	0.00167	0.00124	0.00683	0.07739	0.00785	0.10345	0.17949							2.93843	0.000246402	0.00692	0.05481	0.93802		2.93843	0.03765	0.000278428	0.00143	2.97229e-05	0.00236	0.02675	0.00273	0.03596	0.89281
		2.95082	0.000268107	0.00719	0.09444	0.8981		2.95082	0.60244	0.00631	0.00165	0.00123	0.00691	0.07839	0.00802	0.1061	0.18896							2.95082	0.000241019	0.00687	0.05454	0.93835		2.95082	0.03532	0.000262777	0.00135	2.82465e-05	0.00229	0.02597	0.00267	0.03535	0.89675
		2.96322	0.000262119	0.00713	0.09387	0.89873		2.96322	0.58913	0.00621	0.00162	0.00122	0.00699	0.07932	0.00819	0.10868	0.19864							2.96322	0.000235808	0.00681	0.05427	0.93868		2.96322	0.03316	0.000248125	0.00127	2.6854e-05	0.00222	0.02522	0.00261	0.03475	0.90049
		2.97562	0.000256312	0.00708	0.09331	0.89936		2.97562	0.57576	0.0061	0.00159	0.00121	0.00707	0.08019	0.00835	0.11121	0.20852							2.97562	0.000230744	0.00676	0.054	0.93901		2.97562	0.03114	0.000234386	0.0012	2.554e-05	0.00216	0.0245	0.00256	0.03416	0.90402
		2.98802	0.000250693	0.00702	0.09276	0.89997		2.98802	0.56235	0.00599	0.00157	0.00119	0.00714	0.081	0.00851	0.11368	0.21858							2.98802	0.00022584	0.00671	0.05374	0.93932		2.98802	0.02926	0.000221525	0.00114	2.43011e-05	0.0021	0.0238	0.00251	0.03359	0.90737
		3.00042	0.000245239	0.00696	0.09221	0.90058		3.00042	0.54892	0.00588	0.00154	0.00118	0.0072	0.08173	0.00865	0.11609	0.22881							3.00042	0.000221086	0.00667	0.05348	0.93964		3.00042	0.0275	0.000209464	0.00108	2.31316e-05	0.00204	0.02312	0.00246	0.03302	0.91054
		3.01282	0.000239961	0.00691	0.09168	0.90117		3.01282	0.53551	0.00577	0.00151	0.00116	0.00725	0.0824	0.0088	0.11841	0.23918							3.01282	0.00021648	0.00662	0.05322	0.93994		3.01282	0.02587	0.000198148	0.00102	2.20274e-05	0.00198	0.02248	0.00241	0.03247	0.91356
		3.02521	0.000234839	0.00685	0.09115	0.90176		3.02521	0.52211	0.00566	0.00148	0.00115	0.00731	0.083	0.00893	0.12066	0.24969							3.02521	0.000212002	0.00657	0.05297	0.94025		3.02521	0.02434	0.00018754	0.000966276	2.09847e-05	0.00192	0.02185	0.00236	0.03193	0.91642
		3.03761	0.000229867	0.0068	0.09063	0.90234		3.03761	0.50876	0.00555	0.00145	0.00113	0.00735	0.08354	0.00906	0.12284	0.26032							3.03761	0.00020766	0.00652	0.05272	0.94055		3.03761	0.02292	0.000177586	0.000915602	1.99998e-05	0.00187	0.02124	0.00231	0.0314	0.91914
		3.05001	0.00022505	0.00675	0.09012	0.90291		3.05001	0.49548	0.00543	0.00143	0.00111	0.00739	0.084	0.00919	0.12492	0.27104							3.05001	0.000203446	0.00648	0.05248	0.94084		3.05001	0.02159	0.000168244	0.000868011	1.90701e-05	0.00182	0.02066	0.00227	0.03089	0.92172
		3.06241	0.000220373	0.0067	0.08961	0.90347		3.06241	0.48229	0.00532	0.0014	0.0011	0.00742	0.08439	0.0093	0.12692	0.28186							3.06241	0.000199354	0.00643	0.05224	0.94113		3.06241	0.02035	0.000159468	0.000823254	1.81907e-05	0.00177	0.0201	0.00222	0.03038	0.92418
		3.07481	0.00021584	0.00665	0.08912	0.90402		3.07481	0.46921	0.0052	0.00137	0.00108	0.00745	0.08472	0.00941	0.12883	0.29272							3.07481	0.000195379	0.00639	0.052	0.94141		3.07481	0.01919	0.000151218	0.000781195	1.73591e-05	0.00172	0.01956	0.00218	0.02989	0.92651
		3.08721	0.00021143	0.0066	0.08863	0.90456		3.08721	0.45624	0.00509	0.00134	0.00106	0.00747	0.08499	0.00951	0.13065	0.30365							3.08721	0.000191513	0.00635	0.05177	0.9417		3.08721	0.01811	0.00014347	0.000741609	1.65731e-05	0.00167	0.01903	0.00214	0.02941	0.92874
		3.0996	0.000207152	0.00655	0.08815	0.9051		3.0996	0.44341	0.00497	0.00131	0.00104	0.00748	0.08518	0.00961	0.13238	0.31461							3.0996	0.000187771	0.0063	0.05154	0.94197		3.0996	0.0171	0.000136179	0.000704374	1.58289e-05	0.00163	0.01853	0.0021	0.02893	0.93086
		3.112	0.000203	0.0065	0.08767	0.90562		3.112	0.43074	0.00486	0.00128	0.00103	0.00749	0.08531	0.0097	0.13401	0.32559							3.112	0.000184125	0.00626	0.05131	0.94225		3.112	0.01615	0.000129318	0.000669343	1.51246e-05	0.00158	0.01804	0.00206	0.02847	0.93288
		3.1244	0.000198968	0.00646	0.0872	0.90614		3.1244	0.41824	0.00474	0.00125	0.00101	0.0075	0.08538	0.00978	0.13554	0.33656							3.1244	0.000180586	0.00622	0.05108	0.94252		3.1244	0.01526	0.000122865	0.000636328	1.44577e-05	0.00154	0.01757	0.00202	0.02802	0.93481
		3.1368	0.000195049	0.00641	0.08674	0.90665		3.1368	0.40592	0.00462	0.00122	0.000989207	0.00749	0.0854	0.00985	0.13698	0.34753							3.1368	0.000177137	0.00618	0.05086	0.94278		3.1368	0.01443	0.000116785	0.00060521	1.38256e-05	0.0015	0.01711	0.00198	0.02759	0.93665
		3.1492	0.000191239	0.00636	0.08629	0.90715		3.1492	0.39379	0.00451	0.00119	0.00097031	0.00749	0.08534	0.00992	0.13832	0.35846							3.1492	0.000173784	0.00614	0.05064	0.94304		3.1492	0.01365	0.00011106	0.000575905	1.3227e-05	0.00146	0.01668	0.00194	0.02716	0.93841
		3.1616	0.000187539	0.00632	0.08584	0.90765		3.1616	0.38188	0.0044	0.00116	0.000951303	0.00748	0.08524	0.00998	0.13957	0.36935							3.1616	0.000170538	0.0061	0.05043	0.9433		3.1616	0.01292	0.000105662	0.000548256	1.26594e-05	0.00143	0.01625	0.00191	0.02674	0.94009
		3.174	0.000183931	0.00628	0.0854	0.90814		3.174	0.37018	0.00428	0.00113	0.000932223	0.00746	0.08507	0.01003	0.14072	0.38019							3.174	0.00016736	0.00606	0.05022	0.94355		3.174	0.01223	0.000100574	0.000522168	1.21212e-05	0.00139	0.01584	0.00187	0.02633	0.94169
		3.18639	0.00018043	0.00623	0.08497	0.90862		3.18639	0.35871	0.00417	0.0011	0.000913138	0.00744	0.08486	0.01007	0.14177	0.39096							3.18639	0.000164277	0.00602	0.05001	0.9438		3.18639	0.01159	9.57742e-05	0.000497549	1.16105e-05	0.00135	0.01545	0.00184	0.02593	0.94323
		3.19879	0.000177028	0.00619	0.08454	0.90909		3.19879	0.34746	0.00406	0.00107	0.000893967	0.00741	0.0846	0.01011	0.14274	0.40165							3.19879	0.000161284	0.00599	0.0498	0.94405		3.19879	0.01098	9.12439e-05	0.000474297	1.11259e-05	0.00132	0.01507	0.00181	0.02554	0.9447
		3.21119	0.000173719	0.00615	0.08412	0.90956		3.21119	0.33647	0.00395	0.00105	0.000874948	0.00738	0.08428	0.01014	0.14361	0.41224							3.21119	0.000158361	0.00595	0.0496	0.9443		3.21119	0.01042	8.69669e-05	0.000452336	1.06657e-05	0.00129	0.0147	0.00177	0.02516	0.94611
		3.22359	0.00017049	0.00611	0.0837	0.91002		3.22359	0.32572	0.00385	0.00102	0.000855913	0.00735	0.08392	0.01017	0.14439	0.42274							3.22359	0.000155522	0.00591	0.0494	0.94453		3.22359	0.00988	8.29272e-05	0.000431589	1.02285e-05	0.00126	0.01434	0.00174	0.02479	0.94746
		3.23599	0.000167355	0.00607	0.08329	0.91047		3.23599	0.31522	0.00374	0.000991489	0.000837002	0.00731	0.08352	0.01019	0.14508	0.43312							3.23599	0.000152751	0.00588	0.0492	0.94477		3.23599	0.00938	7.91059e-05	0.000411937	9.81269e-06	0.00123	0.014	0.00171	0.02442	0.94876
		3.24839	0.000164303	0.00603	0.08289	0.91092		3.24839	0.30497	0.00364	0.000964657	0.000818247	0.00727	0.08307	0.0102	0.14568	0.44338							3.24839	0.00015006	0.00584	0.049	0.945		3.24839	0.00891	7.55025e-05	0.000393408	9.41837e-06	0.0012	0.01367	0.00168	0.02407	0.94999
		3.26078	0.000161333	0.00599	0.08249	0.91136		3.26078	0.29498	0.00354	0.000938245	0.000799606	0.00723	0.08259	0.01021	0.1462	0.45351							3.26078	0.000147427	0.00581	0.04881	0.94524		3.26078	0.00846	7.2084e-05	0.000375808	9.04244e-06	0.00117	0.01334	0.00165	0.02372	0.95119
		3.27318	0.00015844	0.00595	0.08209	0.9118		3.27318	0.28526	0.00344	0.000912313	0.000781182	0.00718	0.08207	0.01021	0.14664	0.4635							3.27318	0.000144873	0.00577	0.04862	0.94546		3.27318	0.00804	6.88567e-05	0.000359188	8.68547e-06	0.00114	0.01303	0.00163	0.02339	0.95233
		3.28558	0.000155616	0.00591	0.0817	0.91223		3.28558	0.27578	0.00334	0.000886827	0.000762901	0.00713	0.08152	0.01021	0.147	0.47337							3.28558	0.000142373	0.00574	0.04843	0.94569		3.28558	0.00765	6.58004e-05	0.000343435	8.34546e-06	0.00111	0.01273	0.0016	0.02306	0.95343
		3.29798	0.000152877	0.00587	0.08132	0.91265		3.29798	0.26658	0.00324	0.000861894	0.000744896	0.00708	0.08094	0.0102	0.14729	0.48306							3.29798	0.000139946	0.00571	0.04825	0.94591		3.29798	0.00728	6.29012e-05	0.000328491	8.02163e-06	0.00109	0.01244	0.00157	0.02273	0.95449
		3.31038	0.000150203	0.00584	0.08094	0.91307		3.31038	0.25763	0.00315	0.000837422	0.000727079	0.00702	0.08033	0.01019	0.14749	0.49263							3.31038	0.000137576	0.00567	0.04806	0.94613		3.31038	0.00693	6.0157e-05	0.000314349	7.71355e-06	0.00106	0.01216	0.00155	0.02242	0.9555
		3.32278	0.000147599	0.0058	0.08057	0.91348		3.32278	0.24894	0.00306	0.000813522	0.00070955	0.00696	0.07969	0.01017	0.14763	0.50201							3.32278	0.00013527	0.00564	0.04788	0.94634		3.32278	0.0066	5.75568e-05	0.000300923	7.41952e-06	0.00104	0.01189	0.00152	0.02211	0.95648
		3.33517	0.000145059	0.00576	0.08021	0.91389		3.33517	0.24052	0.00297	0.000790133	0.000692277	0.0069	0.07902	0.01015	0.1477	0.51125							3.33517	0.000133013	0.00561	0.0477	0.94655		3.33517	0.00628	5.50907e-05	0.000288186	7.13971e-06	0.00102	0.01162	0.0015	0.02181	0.95742
		3.34757	0.000142581	0.00573	0.07984	0.91429		3.34757	0.23233	0.00288	0.000767293	0.000675289	0.00684	0.07834	0.01013	0.14771	0.52032							3.34757	0.000130819	0.00558	0.04753	0.94676		3.34757	0.00599	5.27518e-05	0.000276099	6.87249e-06	0.000992554	0.01137	0.00147	0.02151	0.95833
		3.35997	0.000140162	0.00569	0.07948	0.91468		3.35997	0.2244	0.0028	0.00074498	0.000658581	0.00678	0.07764	0.0101	0.14765	0.52923							3.35997	0.000128678	0.00555	0.04735	0.94697		3.35997	0.00571	5.05306e-05	0.000264619	6.61789e-06	0.00097065	0.01112	0.00145	0.02123	0.9592
		3.37237	0.000137814	0.00566	0.07913	0.91507		3.37237	0.21673	0.00271	0.000723235	0.000642187	0.00671	0.07692	0.01006	0.14754	0.53796							3.37237	0.000126582	0.00552	0.04718	0.94718		3.37237	0.00545	4.84228e-05	0.000253727	6.37475e-06	0.000949389	0.01088	0.00143	0.02094	0.96005
		3.38477	0.000135513	0.00563	0.07878	0.91546		3.38477	0.20929	0.00263	0.000702022	0.000626085	0.00665	0.07618	0.01003	0.14736	0.54653							3.38477	0.000124544	0.00549	0.04701	0.94738		3.38477	0.0052	4.6419e-05	0.000243351	6.14279e-06	0.00092882	0.01064	0.0014	0.02067	0.96086
		3.39717	0.000133274	0.00559	0.07844	0.91584		3.39717	0.2021	0.00255	0.000681359	0.000610302	0.00658	0.07542	0.00999	0.14714	0.55493							3.39717	0.000122551	0.00546	0.04684	0.94758		3.39717	0.00496	4.45156e-05	0.000233508	5.92115e-06	0.000908886	0.01042	0.00138	0.0204	0.96164
		3.40957	0.000131087	0.00556	0.0781	0.91621		3.40957	0.19514	0.00248	0.000661249	0.000594847	0.00651	0.07466	0.00994	0.14686	0.56315							3.40957	0.000120607	0.00543	0.04668	0.94777		3.40957	0.00474	4.27067e-05	0.000224133	5.70955e-06	0.000889549	0.0102	0.00136	0.02014	0.9624
		3.42196	0.000128958	0.00553	0.07776	0.91658		3.42196	0.18842	0.0024	0.000641666	0.000579712	0.00644	0.07388	0.0099	0.14654	0.5712							3.42196	0.000118709	0.0054	0.04651	0.94797		3.42196	0.00453	4.09868e-05	0.00021522	5.50718e-06	0.00087082	0.00999	0.00134	0.01988	0.96313
		3.43436	0.000126874	0.00549	0.07743	0.91695		3.43436	0.18191	0.00233	0.000622617	0.000564897	0.00637	0.0731	0.00985	0.14616	0.57908							3.43436	0.000116856	0.00537	0.04635	0.94816		3.43436	0.00433	3.93495e-05	0.00020673	5.3139e-06	0.000852632	0.00978	0.00132	0.01963	0.96384
		3.44676	0.000124845	0.00546	0.0771	0.91731		3.44676	0.17563	0.00226	0.000604107	0.000550416	0.0063	0.07231	0.0098	0.14575	0.5868							3.44676	0.000115047	0.00534	0.04619	0.94835		3.44676	0.00414	3.7792e-05	0.000198644	5.12891e-06	0.000835008	0.00958	0.0013	0.01938	0.96452
		3.45916	0.000122861	0.00543	0.07678	0.91766		3.45916	0.16956	0.00219	0.000586111	0.000536259	0.00623	0.07151	0.00975	0.1453	0.59434							3.45916	0.000113278	0.00532	0.04604	0.94853		3.45916	0.00396	3.63092e-05	0.000190949	4.95204e-06	0.000817906	0.00939	0.00128	0.01914	0.96518
		3.47156	0.000120924	0.0054	0.07646	0.91802		3.47156	0.1637	0.00212	0.000568636	0.000522437	0.00616	0.0707	0.00969	0.14481	0.60172							3.47156	0.000111552	0.00529	0.04588	0.94872		3.47156	0.00379	3.48969e-05	0.000183613	4.78272e-06	0.000801307	0.0092	0.00126	0.01891	0.96582
		3.48396	0.000119033	0.00537	0.07615	0.91836		3.48396	0.15805	0.00206	0.000551673	0.000508935	0.00609	0.06989	0.00963	0.14429	0.60893							3.48396	0.000109865	0.00526	0.04573	0.9489		3.48396	0.00363	3.35508e-05	0.000176619	4.6206e-06	0.0007852	0.00901	0.00125	0.01868	0.96644
		3.49635	0.000117186	0.00534	0.07584	0.9187		3.49635	0.15259	0.002	0.000535209	0.000495771	0.00602	0.06909	0.00957	0.14373	0.61597							3.49635	0.000108215	0.00524	0.04557	0.94908		3.49635	0.00347	3.22667e-05	0.000169953	4.46532e-06	0.00076956	0.00884	0.00123	0.01845	0.96704
		3.50875	0.000115381	0.00531	0.07553	0.91904		3.50875	0.14733	0.00194	0.00051923	0.000482932	0.00595	0.06828	0.00951	0.14314	0.62285							3.50875	0.000106603	0.00521	0.04542	0.94926		3.50875	0.00333	3.10443e-05	0.000163593	4.31666e-06	0.000754371	0.00866	0.00121	0.01823	0.96761
		3.52115	0.000113619	0.00528	0.07522	0.91938		3.52115	0.14225	0.00188	0.000503747	0.000470411	0.00587	0.06747	0.00945	0.14253	0.62958							3.52115	0.000105029	0.00518	0.04527	0.94944		3.52115	0.00319	2.98781e-05	0.000157523	4.1743e-06	0.000739596	0.0085	0.00119	0.01801	0.96818
		3.53355	0.000111895	0.00526	0.07493	0.91971		3.53355	0.13736	0.00182	0.000488682	0.000458208	0.0058	0.06666	0.00939	0.14189	0.63614							3.53355	0.000103489	0.00516	0.04513	0.94961		3.53355	0.00306	2.87647e-05	0.000151727	4.03777e-06	0.000725296	0.00833	0.00118	0.0178	0.96872
		3.54595	0.000110213	0.00523	0.07463	0.92003		3.54595	0.13264	0.00176	0.000474109	0.000446287	0.00573	0.06585	0.00932	0.14121	0.64256							3.54595	0.000101983	0.00513	0.04498	0.94978		3.54595	0.00293	2.77009e-05	0.000146189	3.90671e-06	0.000711336	0.00818	0.00116	0.01759	0.96925
		3.55835	0.000108568	0.0052	0.07434	0.92035		3.55835	0.12809	0.00171	0.000459986	0.00043472	0.00566	0.06504	0.00926	0.14052	0.64883							3.55835	0.000100509	0.00511	0.04484	0.94995		3.55835	0.00281	2.66862e-05	0.0001409	3.78113e-06	0.000697822	0.00802	0.00114	0.01739	0.96976
		3.57074	0.000106958	0.00517	0.07405	0.92067		3.57074	0.1237	0.00166	0.000446326	0.000423437	0.00559	0.06424	0.00919	0.13981	0.65494							3.57074	9.9068e-05	0.00508	0.0447	0.95012		3.57074	0.0027	2.57166e-05	0.000135848	3.6606e-06	0.000684682	0.00787	0.00113	0.01719	0.97026
		3.58314	0.000105384	0.00515	0.07376	0.92099		3.58314	0.11948	0.00161	0.000433066	0.000412464	0.00552	0.06344	0.00912	0.13909	0.6609							3.58314	9.76598e-05	0.00506	0.04456	0.95029		3.58314	0.00259	2.47902e-05	0.000131016	3.54496e-06	0.000671905	0.00773	0.00111	0.017	0.97074
		3.59554	0.000103847	0.00512	0.07348	0.9213		3.59554	0.11541	0.00156	0.000420221	0.000401774	0.00545	0.06265	0.00905	0.13834	0.66672							3.59554	9.62809e-05	0.00504	0.04442	0.95045		3.59554	0.00249	2.39045e-05	0.000126396	3.43371e-06	0.00065945	0.00759	0.0011	0.01681	0.9712
		3.60794	0.000102342	0.00509	0.0732	0.9216		3.60794	0.11149	0.00151	0.000407786	0.0003914	0.00538	0.06186	0.00899	0.13758	0.6724							3.60794	9.49315e-05	0.00501	0.04428	0.95061		3.60794	0.00239	2.30577e-05	0.000121976	3.32709e-06	0.000647376	0.00745	0.00108	0.01662	0.97166
		3.62034	0.00010087	0.00507	0.07293	0.92191		3.62034	0.10771	0.00147	0.000395753	0.000381282	0.00531	0.06107	0.00892	0.1368	0.67794							3.62034	9.36115e-05	0.00499	0.04414	0.95077		3.62034	0.0023	2.2247e-05	0.000117742	3.22467e-06	0.000635581	0.00731	0.00107	0.01644	0.9721
		3.63274	9.943e-05	0.00504	0.07265	0.92221		3.63274	0.10408	0.00142	0.000384098	0.00037145	0.00524	0.0603	0.00885	0.13601	0.68335							3.63274	9.23186e-05	0.00497	0.04401	0.95093		3.63274	0.00221	2.14711e-05	0.000113693	3.12622e-06	0.000624133	0.00718	0.00106	0.01626	0.97253
		3.64514	9.80275e-05	0.00502	0.07239	0.9225		3.64514	0.10057	0.00138	0.000372804	0.000361893	0.00517	0.05953	0.00878	0.13521	0.68863							3.64514	9.10548e-05	0.00494	0.04388	0.95109		3.64514	0.00212	2.07298e-05	0.000109815	3.03141e-06	0.000613002	0.00706	0.00104	0.01608	0.97295
		3.65753	9.66425e-05	0.00499	0.07212	0.92279		3.65753	0.0972	0.00134	0.000361892	0.000352605	0.0051	0.05876	0.00871	0.1344	0.69377							3.65753	8.98143e-05	0.00492	0.04375	0.95124		3.65753	0.00204	2.00198e-05	0.000106099	2.9404e-06	0.00060215	0.00693	0.00103	0.01591	0.97335
		3.66993	9.52928e-05	0.00497	0.07185	0.92309		3.66993	0.09394	0.0013	0.000351323	0.000343571	0.00504	0.05801	0.00864	0.13358	0.6988							3.66993	8.85997e-05	0.0049	0.04362	0.9514		3.66993	0.00197	1.93392e-05	0.000102538	2.85285e-06	0.000591586	0.00681	0.00102	0.01574	0.97375
		3.68233	9.3977e-05	0.00494	0.0716	0.92337		3.68233	0.09081	0.00126	0.000341086	0.000334795	0.00497	0.05726	0.00857	0.13275	0.7037							3.68233	8.74117e-05	0.00488	0.04349	0.95155		3.68233	0.00189	1.86872e-05	9.91256e-05	2.76858e-06	0.000581307	0.0067	0.001	0.01558	0.97413
		3.69473	9.26808e-05	0.00492	0.07134	0.92365		3.69473	0.0878	0.00123	0.000331187	0.000326261	0.00491	0.05652	0.0085	0.13192	0.70848							3.69473	8.62582e-05	0.00486	0.04336	0.9517		3.69473	0.00182	1.80615e-05	9.58543e-05	2.6876e-06	0.000571286	0.00658	0.000991714	0.01541	0.9745
		3.70713	9.14135e-05	0.00489	0.07108	0.92393		3.70713	0.08489	0.00119	0.000321608	0.000317966	0.00484	0.05579	0.00843	0.13108	0.71314							3.70713	8.51137e-05	0.00483	0.04324	0.95184		3.70713	0.00175	1.74621e-05	9.2715e-05	2.6095e-06	0.000561528	0.00647	0.000979543	0.01525	0.97487
		3.71953	9.01811e-05	0.00487	0.07084	0.9242		3.71953	0.08209	0.00115	0.000312341	0.000309914	0.00478	0.05506	0.00836	0.13024	0.71769							3.71953	8.39941e-05	0.00481	0.04311	0.95199		3.71953	0.00169	1.68875e-05	8.97042e-05	2.53436e-06	0.000552024	0.00636	0.000967653	0.0151	0.97522
		3.73192	8.8967e-05	0.00485	0.07059	0.92448		3.73192	0.0794	0.00112	0.000303371	0.000302094	0.00471	0.05435	0.00828	0.12939	0.72213							3.73192	8.29068e-05	0.00479	0.04299	0.95213		3.73192	0.00163	1.63369e-05	8.68146e-05	2.46201e-06	0.000542765	0.00626	0.000956044	0.01494	0.97556
		3.74432	8.77747e-05	0.00482	0.07034	0.92475		3.74432	0.07681	0.00109	0.000294691	0.000294493	0.00465	0.05364	0.00822	0.12854	0.72646							3.74432	8.18326e-05	0.00477	0.04287	0.95228		3.74432	0.00157	1.58087e-05	8.40445e-05	2.39234e-06	0.00053376	0.00616	0.00094466	0.01479	0.9759
		3.75672	8.6611e-05	0.0048	0.0701	0.92501		3.75672	0.0743	0.00106	0.000286306	0.000287121	0.00459	0.05295	0.00815	0.12769	0.73069							3.75672	8.07838e-05	0.00475	0.04275	0.95242		3.75672	0.00151	1.52999e-05	8.13801e-05	2.32505e-06	0.000524941	0.00606	0.00093342	0.01465	0.97623
		3.76912	8.54688e-05	0.00478	0.06986	0.92528		3.76912	0.0719	0.00103	0.000278177	0.000279948	0.00453	0.05226	0.00808	0.12684	0.73481							3.76912	7.9755e-05	0.00473	0.04263	0.95256		3.76912	0.00146	1.48129e-05	7.88211e-05	2.26024e-06	0.000516366	0.00596	0.000922462	0.0145	0.97655
		3.78152	8.43553e-05	0.00476	0.06962	0.92554		3.78152	0.06958	0.000997065	0.00027031	0.000272973	0.00447	0.05158	0.00801	0.12598	0.73884							3.78152	7.87441e-05	0.00471	0.04251	0.9527		3.78152	0.00141	1.43443e-05	7.63567e-05	2.19768e-06	0.000507976	0.00586	0.000911722	0.01436	0.97686
		3.79392	8.32601e-05	0.00474	0.06939	0.9258		3.79392	0.06734	0.000968599	0.000262707	0.000266213	0.00441	0.05091	0.00794	0.12513	0.74276							3.79392	7.77559e-05	0.00469	0.04239	0.95284		3.79392	0.00136	1.38942e-05	7.39925e-05	2.13744e-06	0.000499811	0.00577	0.000901231	0.01422	0.97716
		3.80631	8.21831e-05	0.00471	0.06915	0.92605		3.80631	0.06519	0.000941078	0.00025534	0.000259637	0.00435	0.05025	0.00787	0.12428	0.7466							3.80631	7.67851e-05	0.00467	0.04228	0.95297		3.80631	0.00131	1.34617e-05	7.17213e-05	2.07931e-06	0.000491854	0.00568	0.00089093	0.01408	0.97746
		3.81871	8.11316e-05	0.00469	0.06892	0.9263		3.81871	0.06311	0.000914414	0.00024822	0.000253258	0.0043	0.0496	0.0078	0.12343	0.75035							3.81871	7.58396e-05	0.00465	0.04217	0.9531		3.81871	0.00127	1.30461e-05	6.95379e-05	2.02324e-06	0.000484077	0.00559	0.000880857	0.01395	0.97775
		3.83111	8.00984e-05	0.00467	0.0687	0.92655		3.83111	0.06111	0.00088863	0.000241328	0.000247057	0.00424	0.04896	0.00773	0.12258	0.754							3.83111	7.49055e-05	0.00464	0.04205	0.95324		3.83111	0.00122	1.26466e-05	6.74341e-05	1.9691e-06	0.000476495	0.0055	0.000870975	0.01381	0.97803
		3.84351	7.90876e-05	0.00465	0.06847	0.9268		3.84351	0.05919	0.000863718	0.000234658	0.000241035	0.00418	0.04832	0.00767	0.12173	0.75757							3.84351	7.39907e-05	0.00462	0.04194	0.95337		3.84351	0.00118	1.22618e-05	6.54123e-05	1.91673e-06	0.000469099	0.00542	0.000861247	0.01368	0.9783
		3.85591	7.80989e-05	0.00463	0.06825	0.92704		3.85591	0.05733	0.000839595	0.000228206	0.000235189	0.00413	0.0477	0.0076	0.12088	0.76105							3.85591	7.30942e-05	0.0046	0.04183	0.9535		3.85591	0.00114	1.18923e-05	6.34647e-05	1.86625e-06	0.000461858	0.00534	0.000851733	0.01356	0.97857
		3.86831	7.71254e-05	0.00461	0.06803	0.92728		3.86831	0.05555	0.000816258	0.000221959	0.00022951	0.00408	0.04709	0.00753	0.12004	0.76444							3.86831	7.22133e-05	0.00458	0.04172	0.95363		3.86831	0.00111	1.15366e-05	6.15916e-05	1.81753e-06	0.000454827	0.00526	0.00084244	0.01343	0.97883
		3.88071	7.61709e-05	0.00459	0.06781	0.92752		3.88071	0.05382	0.000793693	0.000215911	0.000223993	0.00402	0.04648	0.00747	0.1192	0.76777							3.88071	7.13506e-05	0.00456	0.04161	0.95376		3.88071	0.00107	1.11939e-05	5.9787e-05	1.77039e-06	0.000447928	0.00518	0.000833288	0.01331	0.97909
		3.8931	7.52352e-05	0.00457	0.06759	0.92776		3.8931	0.05216	0.000771847	0.000210061	0.000218635	0.00397	0.04589	0.0074	0.11837	0.771							3.8931	7.05027e-05	0.00454	0.0415	0.95388		3.8931	0.00103	1.08638e-05	5.80461e-05	1.72482e-06	0.000441199	0.0051	0.000824317	0.01319	0.97934
		3.9055	7.43192e-05	0.00455	0.06738	0.92799		3.9055	0.05055	0.000750715	0.000204393	0.000213429	0.00392	0.0453	0.00734	0.11754	0.77418							3.9055	6.96719e-05	0.00453	0.0414	0.95401		3.9055	0.001	1.05464e-05	5.63723e-05	1.68085e-06	0.000434638	0.00502	0.00081555	0.01307	0.97959
		3.9179	7.34186e-05	0.00453	0.06717	0.92822		3.9179	0.04901	0.000730273	0.00019891	0.000208364	0.00387	0.04473	0.00728	0.11671	0.77727							3.9179	6.88563e-05	0.00451	0.04129	0.95413		3.9179	0.000967649	1.02402e-05	5.47581e-05	1.63827e-06	0.000428222	0.00495	0.000806928	0.01295	0.97983
		3.9303	7.2536e-05	0.00451	0.06696	0.92845		3.9303	0.04752	0.000710484	0.000193595	0.000203468	0.00382	0.04416	0.00721	0.11589	0.78029							3.9303	6.80549e-05	0.00449	0.04119	0.95425		3.9303	0.000936584	9.94545e-06	5.32034e-05	1.59711e-06	0.000421959	0.00488	0.000798448	0.01284	0.98006
		3.9427	7.16697e-05	0.00449	0.06676	0.92868		3.9427	0.04608	0.000691334	0.000188455	0.000198682	0.00377	0.0436	0.00715	0.11508	0.78324							3.9427	6.72698e-05	0.00448	0.04108	0.95437		3.9427	0.000906741	9.66101e-06	5.17022e-05	1.55727e-06	0.000415821	0.00481	0.000790153	0.01273	0.98029
		3.9551	7.08205e-05	0.00448	0.06655	0.9289		3.9551	0.0447	0.000672788	0.00018347	0.000194049	0.00372	0.04305	0.00709	0.11427	0.78613							3.9551	6.64967e-05	0.00446	0.04098	0.95449		3.9551	0.00087805	9.38693e-06	5.02557e-05	1.51876e-06	0.000409835	0.00474	0.000782006	0.01262	0.98051
		3.96749	6.99854e-05	0.00446	0.06635	0.92912		3.96749	0.04336	0.00065484	0.000178652	0.000189543	0.00367	0.04251	0.00703	0.11346	0.78895							3.96749	6.57409e-05	0.00444	0.04088	0.95461		3.96749	0.000850477	9.12264e-06	4.88597e-05	1.48146e-06	0.000403978	0.00467	0.000773999	0.01251	0.98073
		3.97989	6.91663e-05	0.00444	0.06615	0.92934		3.97989	0.04207	0.000637453	0.000173979	0.000185163	0.00363	0.04198	0.00697	0.11266	0.7917							3.97989	6.49953e-05	0.00443	0.04078	0.95473		3.97989	0.000823966	8.86771e-06	4.75121e-05	1.44538e-06	0.00039825	0.00461	0.000766143	0.0124	0.98095
		3.99229	6.83621e-05	0.00442	0.06595	0.92956		3.99229	0.04082	0.000620634	0.000169459	0.000180909	0.00358	0.04145	0.00691	0.11187	0.7944							3.99229	6.42654e-05	0.00441	0.04068	0.95485		3.99229	0.000798469	8.62186e-06	4.6212e-05	1.41046e-06	0.000392647	0.00454	0.000758432	0.01229	0.98116
		4.00469	6.7574e-05	0.0044	0.06576	0.92977		4.00469	0.03962	0.000604342	0.000165072	0.000176776	0.00354	0.04094	0.00685	0.11108	0.79704							4.00469	6.35485e-05	0.00439	0.04058	0.95496		4.00469	0.000773945	8.38447e-06	4.49575e-05	1.37665e-06	0.000387166	0.00448	0.000750864	0.01219	0.98136
		4.01709	6.67983e-05	0.00439	0.06556	0.92999		4.01709	0.03846	0.000588561	0.000160827	0.000172753	0.00349	0.04043	0.00679	0.1103	0.79961							4.01709	6.28431e-05	0.00438	0.04048	0.95508		4.01709	0.000750341	8.15527e-06	4.37452e-05	1.34385e-06	0.000381814	0.00442	0.000743429	0.01209	0.98156
		4.02949	6.60375e-05	0.00437	0.06537	0.9302		4.02949	0.03734	0.000573279	0.000156713	0.000168845	0.00345	0.03993	0.00673	0.10952	0.80213							4.02949	6.21499e-05	0.00436	0.04039	0.95519		4.02949	0.00072763	7.93413e-06	4.25751e-05	1.31206e-06	0.000376571	0.00436	0.000736144	0.01199	0.98176
		4.04188	6.529e-05	0.00435	0.06518	0.93041		4.04188	0.03626	0.000558458	0.000152718	0.00016504	0.00341	0.03944	0.00667	0.10875	0.8046							4.04188	6.14704e-05	0.00435	0.04029	0.9553		4.04188	0.000705743	7.72043e-06	4.14434e-05	1.28128e-06	0.000371438	0.0043	0.000728963	0.01189	0.98195
		4.05428	6.45559e-05	0.00433	0.06499	0.93061		4.05428	0.03521	0.000544118	0.000148853	0.00016135	0.00336	0.03896	0.00662	0.10799	0.80701							4.05428	6.08019e-05	0.00433	0.0402	0.95541		4.05428	0.000684705	7.51427e-06	4.0352e-05	1.25151e-06	0.000366434	0.00424	0.000721943	0.01179	0.98214
		4.06668	6.38347e-05	0.00432	0.0648	0.93082		4.06668	0.0342	0.000530242	0.000145113	0.000157762	0.00332	0.03848	0.00656	0.10724	0.80936							4.06668	6.01445e-05	0.00431	0.04011	0.95552		4.06668	0.000664403	7.31452e-06	3.92951e-05	1.22258e-06	0.000361522	0.00419	0.000715	0.0117	0.98232
		4.07908	6.31261e-05	0.0043	0.06462	0.93102		4.07908	0.03323	0.000516763	0.000141482	0.000154262	0.00328	0.03802	0.0065	0.10649	0.81167							4.07908	5.94999e-05	0.0043	0.04001	0.95563		4.07908	0.000644848	7.12213e-06	3.82731e-05	1.1945e-06	0.000356704	0.00413	0.000708227	0.0116	0.98251
		4.09148	6.24302e-05	0.00428	0.06444	0.93122		4.09148	0.03229	0.000503711	0.000137959	0.000150868	0.00324	0.03756	0.00645	0.10574	0.81393							4.09148	5.88663e-05	0.00428	0.03992	0.95574		4.09148	0.000626001	6.9361e-06	3.72873e-05	1.16734e-06	0.000352014	0.00408	0.000701547	0.01151	0.98268
		4.10388	6.17461e-05	0.00427	0.06425	0.93142		4.10388	0.03138	0.000491074	0.000134549	0.000147571	0.0032	0.03711	0.00639	0.10501	0.81613							4.10388	5.8242e-05	0.00427	0.03983	0.95584		4.10388	0.000607852	6.7557e-06	3.63313e-05	1.14094e-06	0.000347397	0.00403	0.000694988	0.01142	0.98286
		4.11628	6.10751e-05	0.00425	0.06408	0.93161		4.11628	0.0305	0.0004788	0.000131238	0.000144359	0.00316	0.03666	0.00634	0.10428	0.8183							4.11628	5.76296e-05	0.00426	0.03974	0.95595		4.11628	0.000590348	6.58191e-06	3.54091e-05	1.11537e-06	0.000342895	0.00397	0.000688518	0.01133	0.98303
		4.12867	6.04144e-05	0.00423	0.0639	0.93181		4.12867	0.02965	0.000466941	0.000128028	0.000141237	0.00312	0.03623	0.00629	0.10356	0.82041							4.12867	5.70273e-05	0.00424	0.03965	0.95605		4.12867	0.000573482	6.41324e-06	3.45148e-05	1.09053e-06	0.000338472	0.00392	0.00068221	0.01124	0.9832
		4.14107	5.97661e-05	0.00422	0.06372	0.932		4.14107	0.02883	0.000455387	0.000124913	0.000138195	0.00309	0.0358	0.00623	0.10285	0.82248							4.14107	5.64341e-05	0.00423	0.03956	0.95616		4.14107	0.000557165	6.25046e-06	3.36496e-05	1.06639e-06	0.000334142	0.00387	0.000675956	0.01116	0.98336
		4.15347	5.91265e-05	0.0042	0.06355	0.93219		4.15347	0.02804	0.000444207	0.000121887	0.000135235	0.00305	0.03537	0.00618	0.10214	0.82452							4.15347	5.58504e-05	0.00421	0.03947	0.95626		4.15347	0.000541456	6.09257e-06	3.28128e-05	1.04303e-06	0.00032991	0.00383	0.00066983	0.01107	0.98352
		4.16587	5.85003e-05	0.00419	0.06337	0.93238		4.16587	0.02727	0.000433358	0.00011896	0.000132358	0.00301	0.03496	0.00613	0.10144	0.8265							4.16587	5.52781e-05	0.0042	0.03939	0.95636		4.16587	0.000526295	5.93994e-06	3.20022e-05	1.0203e-06	0.000325759	0.00378	0.000663808	0.01099	0.98368
		4.17827	5.7887e-05	0.00417	0.06321	0.93256		4.17827	0.02653	0.000422861	0.000116116	0.00012956	0.00298	0.03455	0.00608	0.10075	0.82845							4.17827	5.47146e-05	0.00418	0.0393	0.95646		4.17827	0.000511666	5.79214e-06	3.12167e-05	9.9824e-07	0.000321679	0.00373	0.000657892	0.01091	0.98383
		4.19067	5.72778e-05	0.00416	0.06303	0.93275		4.19067	0.02581	0.000412647	0.000113356	0.000126834	0.00294	0.03415	0.00603	0.10006	0.83036							4.19067	5.41611e-05	0.00417	0.03921	0.95656		4.19067	0.00049755	5.6494e-06	3.04569e-05	9.76808e-07	0.000317697	0.00369	0.000652081	0.01082	0.98398
		4.20306	5.66847e-05	0.00414	0.06287	0.93293		4.20306	0.02512	0.000402764	0.000110674	0.000124179	0.00291	0.03375	0.00598	0.09938	0.83223							4.20306	5.3618e-05	0.00416	0.03913	0.95666		4.20306	0.000483888	5.51084e-06	2.97213e-05	9.55997e-07	0.000313785	0.00364	0.000646336	0.01074	0.98413
		4.21546	5.60985e-05	0.00413	0.0627	0.93311		4.21546	0.02444	0.000393146	0.000108075	0.0001216	0.00288	0.03336	0.00593	0.09871	0.83406							4.21546	5.30833e-05	0.00414	0.03905	0.95676		4.21546	0.000470711	5.37653e-06	2.9006e-05	9.35769e-07	0.000309965	0.0036	0.000640697	0.01067	0.98428
		4.22786	5.55195e-05	0.00411	0.06253	0.9333		4.22786	0.02379	0.000383825	0.000105549	0.000119085	0.00284	0.03298	0.00588	0.09804	0.83585							4.22786	5.25551e-05	0.00413	0.03896	0.95685		4.22786	0.000457966	5.24653e-06	2.83156e-05	9.16112e-07	0.000306198	0.00355	0.000635167	0.01059	0.98442
		4.24026	5.49556e-05	0.0041	0.06237	0.93347		4.24026	0.02317	0.000374778	0.000103097	0.000116635	0.00281	0.03261	0.00584	0.09738	0.83761							4.24026	5.20355e-05	0.00412	0.03888	0.95695		4.24026	0.000445658	5.1206e-06	2.7643e-05	8.96997e-07	0.000302509	0.00351	0.00062971	0.01051	0.98457
		4.25266	5.43982e-05	0.00408	0.06221	0.93365		4.25266	0.02256	0.000366003	0.000100715	0.000114252	0.00278	0.03224	0.00579	0.09673	0.83933							4.25266	5.15255e-05	0.0041	0.0388	0.95704		4.25266	0.00043377	4.99839e-06	2.69932e-05	8.784e-07	0.000298909	0.00347	0.000624337	0.01044	0.9847
		4.26506	5.38503e-05	0.00407	0.06205	0.93383		4.26506	0.02197	0.000357477	9.84033e-05	0.000111932	0.00274	0.03187	0.00574	0.09608	0.84102							4.26506	5.10243e-05	0.00409	0.03872	0.95714		4.26506	0.000422272	4.88015e-06	2.6364e-05	8.6034e-07	0.000295373	0.00343	0.000619065	0.01036	0.98484
		4.27745	5.33077e-05	0.00406	0.06189	0.934		4.27745	0.0214	0.00034919	9.61569e-05	0.000109669	0.00271	0.03152	0.0057	0.09544	0.84268							4.27745	5.05284e-05	0.00408	0.03864	0.95723		4.27745	0.00041115	4.76535e-06	2.57513e-05	8.4277e-07	0.000291896	0.00339	0.000613875	0.01029	0.98497
		4.28985	5.27781e-05	0.00404	0.06174	0.93417		4.28985	0.02084	0.000341139	9.39743e-05	0.000107467	0.00268	0.03116	0.00565	0.09481	0.8443							4.28985	5.00428e-05	0.00407	0.03856	0.95733		4.28985	0.000400397	4.65404e-06	2.51584e-05	8.25684e-07	0.000288487	0.00335	0.000608766	0.01022	0.9851
		4.30225	5.22551e-05	0.00403	0.06158	0.93434		4.30225	0.02031	0.000333342	9.18551e-05	0.000105321	0.00265	0.03082	0.00561	0.09418	0.8459							4.30225	4.95635e-05	0.00405	0.03848	0.95742		4.30225	0.000390004	4.54609e-06	2.45838e-05	8.09058e-07	0.000285141	0.00331	0.000603737	0.01014	0.98523
		4.31465	5.17435e-05	0.00401	0.06142	0.93451		4.31465	0.01979	0.000325751	8.97942e-05	0.000103231	0.00262	0.03048	0.00556	0.09356	0.84746							4.31465	4.9095e-05	0.00404	0.0384	0.95751		4.31465	0.000379934	4.44134e-06	2.40251e-05	7.92871e-07	0.000281863	0.00328	0.000598788	0.01007	0.98536
		4.32705	5.12396e-05	0.004	0.06128	0.93467		4.32705	0.01929	0.000318376	8.77915e-05	0.000101193	0.00259	0.03014	0.00552	0.09295	0.849							4.32705	4.86296e-05	0.00403	0.03832	0.9576		4.32705	0.000370191	4.33966e-06	2.3483e-05	7.7714e-07	0.000278649	0.00324	0.000593916	0.01001	0.98548
		4.33945	5.07395e-05	0.00399	0.06112	0.93484		4.33945	0.0188	0.000311212	8.58456e-05	9.92082e-05	0.00257	0.02981	0.00548	0.09235	0.8505							4.33945	4.81739e-05	0.00402	0.03825	0.95769		4.33945	0.00036077	4.24102e-06	2.2956e-05	7.61805e-07	0.000275489	0.0032	0.000589116	0.00994	0.98561
		4.35185	5.02494e-05	0.00397	0.06097	0.935		4.35185	0.01833	0.000304258	8.39538e-05	9.72705e-05	0.00254	0.02949	0.00544	0.09175	0.85198							4.35185	4.77235e-05	0.004	0.03817	0.95778		4.35185	0.000351654	4.14555e-06	2.24471e-05	7.46926e-07	0.000272404	0.00317	0.000584423	0.00987	0.98573
		4.36424	4.97689e-05	0.00396	0.06082	0.93517		4.36424	0.01787	0.000297491	8.21134e-05	9.53826e-05	0.00251	0.02917	0.00539	0.09115	0.85342							4.36424	4.72826e-05	0.00399	0.0381	0.95787		4.36424	0.000342818	4.0525e-06	2.19499e-05	7.32383e-07	0.000269356	0.00313	0.000579755	0.0098	0.98585
		4.37664	4.92957e-05	0.00395	0.06067	0.93533		4.37664	0.01743	0.000290913	8.03266e-05	9.3546e-05	0.00248	0.02886	0.00535	0.09057	0.85484							4.37664	4.68454e-05	0.00398	0.03802	0.95795		4.37664	0.000334247	3.9621e-06	2.14671e-05	7.18213e-07	0.000266366	0.0031	0.000575157	0.00974	0.98596
		4.38904	4.88268e-05	0.00393	0.06053	0.93549		4.38904	0.017	0.000284509	7.85814e-05	9.1751e-05	0.00246	0.02855	0.00531	0.08998	0.85625							4.38904	4.64143e-05	0.00397	0.03795	0.95804		4.38904	0.00032595	3.87435e-06	2.09984e-05	7.04422e-07	0.000263428	0.00306	0.000570636	0.00967	0.98608
		4.40144	4.83673e-05	0.00392	0.06038	0.93565		4.40144	0.01658	0.000278296	7.68938e-05	9.00075e-05	0.00243	0.02825	0.00527	0.08941	0.85761							4.40144	4.59928e-05	0.00396	0.03787	0.95812		4.40144	0.000317929	3.78935e-06	2.05444e-05	6.9102e-07	0.000260555	0.00303	0.000566214	0.00961	0.98619
		4.41384	4.7913e-05	0.00391	0.06024	0.9358		4.41384	0.01618	0.000272255	7.5248e-05	8.83029e-05	0.0024	0.02795	0.00523	0.08884	0.85896							4.41384	4.55749e-05	0.00394	0.0378	0.95821		4.41384	0.000310154	3.70666e-06	2.01024e-05	6.77978e-07	0.000257739	0.003	0.000561851	0.00955	0.9863
		4.42624	4.74699e-05	0.0039	0.0601	0.93596		4.42624	0.01579	0.000266383	7.36488e-05	8.66439e-05	0.00238	0.02766	0.00519	0.08829	0.86027							4.42624	4.51656e-05	0.00393	0.03773	0.95829		4.42624	0.000302594	3.62614e-06	1.9672e-05	6.65159e-07	0.000254951	0.00297	0.000557514	0.00949	0.98641
		4.43863	4.70283e-05	0.00388	0.05996	0.93611		4.43863	0.01541	0.000260659	7.20889e-05	8.50188e-05	0.00235	0.02737	0.00515	0.08773	0.86158							4.43863	4.47622e-05	0.00392	0.03766	0.95838		4.43863	0.00029529	3.54815e-06	1.92543e-05	6.52784e-07	0.000252229	0.00293	0.000553285	0.00943	0.98652
		4.45103	4.65959e-05	0.00387	0.05982	0.93627		4.45103	0.01504	0.00025509	7.05706e-05	8.34323e-05	0.00233	0.02708	0.00511	0.08718	0.86285							4.45103	4.43643e-05	0.00391	0.03759	0.95846		4.45103	0.000288202	3.47219e-06	1.88483e-05	6.407e-07	0.000249552	0.0029	0.00054909	0.00937	0.98662
		4.46343	4.61703e-05	0.00386	0.05968	0.93642		4.46343	0.01468	0.000249676	6.9097e-05	8.18894e-05	0.0023	0.0268	0.00508	0.08664	0.8641							4.46343	4.39725e-05	0.0039	0.03751	0.95854		4.46343	0.000281317	3.39828e-06	1.84526e-05	6.28838e-07	0.000246914	0.00287	0.000544952	0.00931	0.98672
		4.47583	4.57509e-05	0.00385	0.05954	0.93657		4.47583	0.01433	0.000244418	6.76607e-05	8.03876e-05	0.00228	0.02653	0.00504	0.0861	0.86533							4.47583	4.35848e-05	0.00389	0.03744	0.95862		4.47583	0.000274653	3.32651e-06	1.80682e-05	6.17361e-07	0.000244333	0.00284	0.000540923	0.00925	0.98683
		4.48823	4.53383e-05	0.00384	0.0594	0.93671		4.48823	0.01399	0.000239283	6.62602e-05	7.89159e-05	0.00226	0.02625	0.005	0.08557	0.86654							4.48823	4.32046e-05	0.00388	0.03738	0.9587		4.48823	0.000268187	3.25675e-06	1.76944e-05	6.06152e-07	0.000241793	0.00281	0.000536902	0.00919	0.98693
		4.50063	4.4931e-05	0.00382	0.05927	0.93686		4.50063	0.01367	0.000234299	6.49e-05	7.74814e-05	0.00223	0.02599	0.00497	0.08505	0.86772							4.50063	4.28301e-05	0.00387	0.03731	0.95878		4.50063	0.000261908	3.1888e-06	1.73307e-05	5.95175e-07	0.000239294	0.00279	0.000532972	0.00913	0.98703
		4.51302	4.45298e-05	0.00381	0.05914	0.93701		4.51302	0.01335	0.000229437	6.35723e-05	7.60789e-05	0.00221	0.02572	0.00493	0.08453	0.86889							4.51302	4.24614e-05	0.00386	0.03724	0.95886		4.51302	0.000255825	3.12283e-06	1.69772e-05	5.84533e-07	0.000236847	0.00276	0.000529075	0.00908	0.98712
		4.52542	4.41366e-05	0.0038	0.059	0.93715		4.52542	0.01304	0.000224714	6.22852e-05	7.47143e-05	0.00219	0.02547	0.00489	0.08401	0.87004							4.52542	4.2097e-05	0.00385	0.03717	0.95894		4.52542	0.000249912	3.05852e-06	1.66325e-05	5.74104e-07	0.000234435	0.00273	0.000525233	0.00902	0.98722
		4.53782	4.3746e-05	0.00379	0.05887	0.9373		4.53782	0.01274	0.00022011	6.10273e-05	7.33786e-05	0.00216	0.02521	0.00486	0.0835	0.87117							4.53782	4.17371e-05	0.00383	0.0371	0.95902		4.53782	0.000244169	2.99601e-06	1.62969e-05	5.63931e-07	0.00023206	0.0027	0.000521468	0.00897	0.98731
		4.55022	4.3363e-05	0.00378	0.05874	0.93744		4.55022	0.01245	0.000215625	5.98007e-05	7.2076e-05	0.00214	0.02496	0.00482	0.083	0.87228							4.55022	4.13837e-05	0.00382	0.03704	0.9591		4.55022	0.000238599	2.935e-06	1.59706e-05	5.54008e-07	0.000229732	0.00268	0.000517728	0.00891	0.98741
		4.56262	4.29841e-05	0.00377	0.05861	0.93758		4.56262	0.01216	0.000211254	5.86083e-05	7.08036e-05	0.00212	0.02472	0.00479	0.0825	0.87336							4.56262	4.10341e-05	0.00381	0.03697	0.95917		4.56262	0.000233188	2.87586e-06	1.56525e-05	5.44332e-07	0.00022744	0.00265	0.000514056	0.00886	0.9875
		4.57502	4.26111e-05	0.00376	0.05848	0.93772		4.57502	0.01189	0.000206998	5.7443e-05	6.95587e-05	0.0021	0.02447	0.00476	0.08201	0.87444							4.57502	4.06911e-05	0.0038	0.03691	0.95925		4.57502	0.000227934	2.81812e-06	1.53433e-05	5.34885e-07	0.000225191	0.00262	0.000510439	0.00881	0.98759
		4.58742	4.2245e-05	0.00374	0.05835	0.93786		4.58742	0.01162	0.000202853	5.63101e-05	6.83459e-05	0.00208	0.02423	0.00472	0.08152	0.87549							4.58742	4.03525e-05	0.00379	0.03684	0.95933		4.58742	0.000222823	2.762e-06	1.50417e-05	5.25657e-07	0.000222977	0.0026	0.000506868	0.00876	0.98767
		4.59981	4.18826e-05	0.00373	0.05823	0.938		4.59981	0.01136	0.000198827	5.52062e-05	6.71608e-05	0.00206	0.024	0.00469	0.08104	0.87653							4.59981	4.00179e-05	0.00378	0.03678	0.9594		4.59981	0.000217866	2.70729e-06	1.47481e-05	5.16666e-07	0.0002208	0.00257	0.000503364	0.00871	0.98776
		4.61221	4.15262e-05	0.00372	0.0581	0.93813		4.61221	0.01111	0.000194883	5.41307e-05	6.60019e-05	0.00204	0.02377	0.00466	0.08057	0.87754							4.61221	3.96877e-05	0.00377	0.03671	0.95947		4.61221	0.000213051	2.65393e-06	1.44619e-05	5.07855e-07	0.000218661	0.00255	0.000499884	0.00865	0.98785
		4.62461	4.11748e-05	0.00371	0.05798	0.93827		4.62461	0.01086	0.000191049	5.30816e-05	6.48702e-05	0.00202	0.02354	0.00462	0.0801	0.87855							4.62461	3.93626e-05	0.00376	0.03665	0.95955		4.62461	0.000208368	2.60211e-06	1.41832e-05	4.99275e-07	0.00021655	0.00252	0.000496472	0.0086	0.98793
		4.63701	4.08277e-05	0.0037	0.05786	0.9384		4.63701	0.01063	0.000187306	5.20573e-05	6.3764e-05	0.002	0.02331	0.00459	0.07963	0.87953							4.63701	3.90422e-05	0.00375	0.03659	0.95962		4.63701	0.000203819	2.55152e-06	1.39112e-05	4.90879e-07	0.000214482	0.0025	0.00049309	0.00856	0.98802
		4.64941	4.0486e-05	0.00369	0.05773	0.93854		4.64941	0.01039	0.00018366	5.10591e-05	6.26833e-05	0.00198	0.02309	0.00456	0.07917	0.8805							4.64941	3.87265e-05	0.00374	0.03652	0.95969		4.64941	0.000199394	2.50215e-06	1.36464e-05	4.82675e-07	0.000212442	0.00248	0.00048975	0.00851	0.9881
		4.66181	4.01487e-05	0.00368	0.05761	0.93867		4.66181	0.01017	0.000180112	5.00872e-05	6.16274e-05	0.00196	0.02287	0.00453	0.07872	0.88146							4.66181	3.84143e-05	0.00373	0.03646	0.95977		4.66181	0.000195093	2.45421e-06	1.33882e-05	4.74667e-07	0.000210426	0.00245	0.000486472	0.00846	0.98818
		4.6742	3.98159e-05	0.00367	0.05749	0.9388		4.6742	0.00995	0.000176654	4.91381e-05	6.05942e-05	0.00194	0.02266	0.0045	0.07827	0.8824							4.6742	3.81069e-05	0.00372	0.0364	0.95984		4.6742	0.000190901	2.40726e-06	1.31363e-05	4.66838e-07	0.000208454	0.00243	0.000483221	0.00841	0.98826
		4.6866	3.94884e-05	0.00366	0.05737	0.93893		4.6866	0.00973	0.000173277	4.82115e-05	5.95855e-05	0.00192	0.02245	0.00447	0.07782	0.88332							4.6866	3.78027e-05	0.00372	0.03634	0.95991		4.6866	0.000186835	2.36167e-06	1.28916e-05	4.59196e-07	0.00020652	0.00241	0.000480028	0.00836	0.98834
		4.699	3.91653e-05	0.00365	0.05725	0.93906		4.699	0.00953	0.000169976	4.73088e-05	5.85979e-05	0.00191	0.02224	0.00444	0.07738	0.88423							4.699	3.75043e-05	0.00371	0.03628	0.95998		4.699	0.000182876	2.31725e-06	1.26521e-05	4.51715e-07	0.000204608	0.00239	0.000476868	0.00832	0.98842
		4.7114	3.88466e-05	0.00364	0.05714	0.93919		4.7114	0.00932	0.000166761	4.64275e-05	5.7633e-05	0.00189	0.02203	0.00441	0.07695	0.88513							4.7114	3.7209e-05	0.0037	0.03622	0.96005		4.7114	0.000179022	2.27377e-06	1.24182e-05	4.44411e-07	0.00020272	0.00236	0.000473759	0.00827	0.98849
		4.7238	3.85319e-05	0.00363	0.05702	0.93931		4.7238	0.00913	0.000163634	4.55683e-05	5.66898e-05	0.00187	0.02183	0.00438	0.07651	0.88601							4.7238	3.69172e-05	0.00369	0.03616	0.96012		4.7238	0.000175279	2.23142e-06	1.21902e-05	4.37253e-07	0.000200873	0.00234	0.000470677	0.00823	0.98857
		4.7362	3.82219e-05	0.00362	0.0569	0.93944		4.7362	0.00894	0.000160575	4.47302e-05	5.57682e-05	0.00185	0.02163	0.00435	0.07609	0.88688							4.7362	3.66318e-05	0.00368	0.0361	0.96019		4.7362	0.000171634	2.19029e-06	1.19688e-05	4.30292e-07	0.000199053	0.00232	0.000467668	0.00818	0.98864
		4.74859	3.79174e-05	0.00361	0.05679	0.93956		4.74859	0.00875	0.000157595	4.39109e-05	5.48654e-05	0.00184	0.02144	0.00432	0.07567	0.88773							4.74859	3.63467e-05	0.00367	0.03604	0.96026		4.74859	0.000168087	2.14997e-06	1.17516e-05	4.23449e-07	0.000197257	0.0023	0.000464669	0.00814	0.98872
		4.76099	3.76157e-05	0.0036	0.05668	0.93969		4.76099	0.00857	0.000154684	4.3112e-05	5.39825e-05	0.00182	0.02124	0.00429	0.07525	0.88857							4.76099	3.60661e-05	0.00366	0.03598	0.96032		4.76099	0.000164629	2.11063e-06	1.15396e-05	4.16764e-07	0.000195489	0.00228	0.00046171	0.0081	0.98879
		4.77339	3.73178e-05	0.00359	0.05656	0.93981		4.77339	0.00839	0.000151831	4.23284e-05	5.31152e-05	0.0018	0.02105	0.00427	0.07483	0.88941							4.77339	3.57917e-05	0.00365	0.03592	0.96039		4.77339	0.000161261	2.0723e-06	1.13334e-05	4.10223e-07	0.000193746	0.00226	0.000458789	0.00805	0.98886
		4.78579	3.70234e-05	0.00358	0.05645	0.93993		4.78579	0.00822	0.000149059	4.15667e-05	5.22707e-05	0.00179	0.02086	0.00424	0.07443	0.89023							4.78579	3.55187e-05	0.00364	0.03587	0.96046		4.78579	0.000157986	2.0349e-06	1.11314e-05	4.03834e-07	0.000192041	0.00224	0.000455913	0.00801	0.98893
		4.79819	3.67336e-05	0.00357	0.05634	0.94005		4.79819	0.00805	0.000146357	4.08248e-05	5.14463e-05	0.00177	0.02068	0.00421	0.07402	0.89103							4.79819	3.52503e-05	0.00363	0.03581	0.96052		4.79819	0.000154791	1.99842e-06	1.09344e-05	3.97579e-07	0.000190353	0.00222	0.000453075	0.00797	0.989
		4.81059	3.64461e-05	0.00356	0.05623	0.94017		4.81059	0.00789	0.000143713	4.00983e-05	5.0637e-05	0.00176	0.0205	0.00418	0.07362	0.89182							4.81059	3.49849e-05	0.00362	0.03575	0.96059		4.81059	0.000151681	1.96269e-06	1.07421e-05	3.91443e-07	0.000188685	0.0022	0.000450256	0.00793	0.98907
		4.82299	3.61651e-05	0.00355	0.05612	0.94029		4.82299	0.00773	0.000141124	3.93868e-05	4.9843e-05	0.00174	0.02032	0.00416	0.07323	0.8926							4.82299	3.47211e-05	0.00362	0.03569	0.96065		4.82299	0.000148651	1.92791e-06	1.05546e-05	3.85457e-07	0.000187052	0.00218	0.00044749	0.00788	0.98914
		4.83538	3.58859e-05	0.00354	0.05601	0.94041		4.83538	0.00757	0.000138602	3.8694e-05	4.90659e-05	0.00172	0.02014	0.00413	0.07284	0.89337							4.83538	3.44647e-05	0.00361	0.03564	0.96072		4.83538	0.000145704	1.89396e-06	1.03713e-05	3.796e-07	0.000185441	0.00217	0.00044476	0.00784	0.9892
		4.84778	3.56126e-05	0.00353	0.05591	0.94053		4.84778	0.00742	0.000136145	3.80171e-05	4.83119e-05	0.00171	0.01996	0.00411	0.07245	0.89413							4.84778	3.42076e-05	0.0036	0.03558	0.96078		4.84778	0.000142831	1.86081e-06	1.01922e-05	3.73866e-07	0.000183858	0.00215	0.000442062	0.0078	0.98927
		4.86018	3.53415e-05	0.00352	0.0558	0.94064		4.86018	0.00727	0.000133736	3.73553e-05	4.75677e-05	0.00169	0.01979	0.00408	0.07206	0.89488							4.86018	3.39573e-05	0.00359	0.03553	0.96084		4.86018	0.000140032	1.82841e-06	1.00172e-05	3.68249e-07	0.000182294	0.00213	0.000439398	0.00776	0.98933
		4.87258	3.50734e-05	0.00351	0.05569	0.94076		4.87258	0.00713	0.000131388	3.67093e-05	4.68385e-05	0.00168	0.01962	0.00405	0.07169	0.89561							4.87258	3.37072e-05	0.00358	0.03547	0.96091		4.87258	0.000137296	1.79669e-06	9.84627e-06	3.62739e-07	0.000180751	0.00211	0.000436767	0.00773	0.9894
		4.88498	3.48083e-05	0.00351	0.05559	0.94087		4.88498	0.00699	0.000129095	3.60778e-05	4.6127e-05	0.00167	0.01946	0.00403	0.07131	0.89634							4.88498	3.34625e-05	0.00357	0.03542	0.96097		4.88498	0.000134639	1.76585e-06	9.67949e-06	3.57365e-07	0.000179238	0.00209	0.000434149	0.00769	0.98946
		4.89738	3.45468e-05	0.0035	0.05548	0.94099		4.89738	0.00685	0.000126852	3.5459e-05	4.543e-05	0.00165	0.01929	0.004	0.07094	0.89705							4.89738	3.32193e-05	0.00357	0.03537	0.96103		4.89738	0.00013204	1.73557e-06	9.51613e-06	3.52085e-07	0.000177738	0.00208	0.000431586	0.00765	0.98952
		4.90977	3.4291e-05	0.00349	0.05538	0.9411		4.90977	0.00672	0.000124657	3.48555e-05	4.47446e-05	0.00164	0.01913	0.00398	0.07057	0.89776							4.90977	3.29803e-05	0.00356	0.03531	0.9611		4.90977	0.000129508	1.70607e-06	9.35665e-06	3.46933e-07	0.000176263	0.00206	0.000429045	0.00761	0.98958
		4.92217	3.40364e-05	0.00348	0.05528	0.94121		4.92217	0.00659	0.000122516	3.42673e-05	4.40784e-05	0.00162	0.01897	0.00396	0.07021	0.89845							4.92217	3.27441e-05	0.00355	0.03526	0.96116		4.92217	0.000127043	1.67723e-06	9.20085e-06	3.41879e-07	0.000174813	0.00204	0.00042654	0.00757	0.98964
		4.93457	3.3785e-05	0.00347	0.05517	0.94132		4.93457	0.00646	0.000120424	3.36886e-05	4.34229e-05	0.00161	0.01881	0.00393	0.06985	0.89914							4.93457	3.25101e-05	0.00354	0.03521	0.96122		4.93457	0.000124636	1.64902e-06	9.04841e-06	3.36896e-07	0.000173383	0.00203	0.000424084	0.00754	0.9897
		4.94697	3.35368e-05	0.00346	0.05507	0.94143		4.94697	0.00634	0.000118376	3.3124e-05	4.27785e-05	0.0016	0.01865	0.00391	0.06949	0.89982							4.94697	3.22797e-05	0.00353	0.03516	0.96128		4.94697	0.000122284	1.62145e-06	8.89914e-06	3.32056e-07	0.00017197	0.00201	0.000421622	0.0075	0.98976
		4.95937	3.32919e-05	0.00345	0.05497	0.94154		4.95937	0.00622	0.000116376	3.25732e-05	4.21515e-05	0.00158	0.0185	0.00389	0.06914	0.90048							4.95937	3.20522e-05	0.00353	0.0351	0.96134		4.95937	0.000119995	1.59451e-06	8.75346e-06	3.27289e-07	0.000170579	0.00199	0.000419214	0.00746	0.98982
		4.97177	3.30512e-05	0.00344	0.05487	0.94165		4.97177	0.0061	0.000114419	3.20344e-05	4.15331e-05	0.00157	0.01835	0.00386	0.06879	0.90114							4.97177	3.18277e-05	0.00352	0.03505	0.9614		4.97177	0.000117758	1.56815e-06	8.6111e-06	3.22623e-07	0.000169207	0.00198	0.000416816	0.00743	0.98988
		4.98416	3.28122e-05	0.00344	0.05477	0.94176		4.98416	0.00599	0.000112507	3.15068e-05	4.093e-05	0.00156	0.0182	0.00384	0.06845	0.90179							4.98416	3.16055e-05	0.00351	0.035	0.96146		4.98416	0.000115577	1.54239e-06	8.47168e-06	3.18061e-07	0.000167857	0.00196	0.000414464	0.00739	0.98994
		4.99656	3.2577e-05	0.00343	0.05468	0.94186		4.99656	0.00587	0.000110636	3.09912e-05	4.03371e-05	0.00154	0.01805	0.00382	0.06811	0.90243							4.99656	3.13851e-05	0.0035	0.03495	0.96152		4.99656	0.00011345	1.51722e-06	8.33541e-06	3.13585e-07	0.000166526	0.00195	0.000412122	0.00736	0.98999
		5.00896	3.23447e-05	0.00342	0.05458	0.94197		5.00896	0.00577	0.000108808	3.0487e-05	3.97584e-05	0.00153	0.0179	0.00379	0.06777	0.90306							5.00896	3.11691e-05	0.00349	0.0349	0.96157		5.00896	0.000111372	1.49259e-06	8.202e-06	3.09204e-07	0.000165212	0.00193	0.00040982	0.00732	0.99005
		5.02136	3.21139e-05	0.00341	0.05448	0.94208		5.02136	0.00566	0.000107018	2.9992e-05	3.91894e-05	0.00152	0.01776	0.00377	0.06743	0.90368							5.02136	3.0954e-05	0.00349	0.03485	0.96163		5.02136	0.000109345	1.46847e-06	8.0714e-06	3.04903e-07	0.000163916	0.00192	0.000407542	0.00729	0.9901
		5.03376	3.18879e-05	0.0034	0.05438	0.94218		5.03376	0.00555	0.000105268	2.95089e-05	3.86317e-05	0.00151	0.01762	0.00375	0.0671	0.90429							5.03376	3.07425e-05	0.00348	0.0348	0.96169		5.03376	0.000107364	1.4449e-06	7.94388e-06	3.00694e-07	0.000162639	0.0019	0.000405298	0.00725	0.99016
		5.04616	3.16637e-05	0.00339	0.05429	0.94228		5.04616	0.00545	0.000103555	2.90365e-05	3.80857e-05	0.00149	0.01748	0.00373	0.06678	0.9049							5.04616	3.05341e-05	0.00347	0.03475	0.96175		5.04616	0.00010543	1.42185e-06	7.81893e-06	2.96553e-07	0.000161375	0.00189	0.000403073	0.00722	0.99021
		5.05856	3.14424e-05	0.00339	0.05419	0.94239		5.05856	0.00535	0.00010188	2.8574e-05	3.75493e-05	0.00148	0.01734	0.00371	0.06645	0.9055							5.05856	3.03278e-05	0.00346	0.0347	0.9618		5.05856	0.000103542	1.39927e-06	7.69653e-06	2.92505e-07	0.000160137	0.00187	0.000400883	0.00719	0.99026
		5.07095	3.12221e-05	0.00338	0.0541	0.94249		5.07095	0.00526	0.00010024	2.81212e-05	3.70236e-05	0.00147	0.01721	0.00369	0.06613	0.90609							5.07095	3.01248e-05	0.00346	0.03465	0.96186		5.07095	0.000101698	1.37718e-06	7.57686e-06	2.88526e-07	0.000158907	0.00186	0.000398711	0.00716	0.99032
		5.08335	3.10062e-05	0.00337	0.05401	0.94259		5.08335	0.00516	9.86366e-05	2.76773e-05	3.65087e-05	0.00146	0.01707	0.00367	0.06581	0.90667							5.08335	2.99225e-05	0.00345	0.03461	0.96192		5.08335	9.98971e-05	1.35553e-06	7.45975e-06	2.84624e-07	0.000157699	0.00185	0.000396569	0.00712	0.99037
		5.09575	3.07944e-05	0.00336	0.05391	0.94269		5.09575	0.00507	9.70659e-05	2.72428e-05	3.60028e-05	0.00145	0.01694	0.00364	0.0655	0.90724							5.09575	2.97227e-05	0.00344	0.03456	0.96197		5.09575	9.81374e-05	1.33441e-06	7.34508e-06	2.80808e-07	0.000156509	0.00183	0.000394439	0.00709	0.99042
		5.10815	3.05822e-05	0.00336	0.05382	0.94279		5.10815	0.00498	9.55288e-05	2.68181e-05	3.55081e-05	0.00144	0.01681	0.00362	0.06518	0.90781							5.10815	2.95253e-05	0.00344	0.03451	0.96202		5.10815	9.64189e-05	1.3137e-06	7.23275e-06	2.77059e-07	0.000155337	0.00182	0.00039234	0.00706	0.99047
		5.12055	3.03739e-05	0.00335	0.05373	0.94289		5.12055	0.00489	9.40245e-05	2.6402e-05	3.50209e-05	0.00143	0.01668	0.0036	0.06488	0.90837							5.12055	2.93302e-05	0.00343	0.03446	0.96208		5.12055	9.47391e-05	1.29344e-06	7.12284e-06	2.73372e-07	0.000154179	0.0018	0.000390273	0.00703	0.99052
		5.13295	3.01685e-05	0.00334	0.05364	0.94299		5.13295	0.0048	9.25515e-05	2.59955e-05	3.45442e-05	0.00141	0.01655	0.00358	0.06457	0.90892							5.13295	2.91374e-05	0.00342	0.03441	0.96214		5.13295	9.30976e-05	1.2736e-06	7.01507e-06	2.69758e-07	0.000153029	0.00179	0.000388218	0.007	0.99057
		5.14534	2.99652e-05	0.00333	0.05355	0.94309		5.14534	0.00472	9.11143e-05	2.55972e-05	3.40775e-05	0.0014	0.01643	0.00356	0.06427	0.90946							5.14534	2.89489e-05	0.00341	0.03437	0.96219		5.14534	9.14905e-05	1.25411e-06	6.90935e-06	2.66215e-07	0.000151891	0.00178	0.000386175	0.00697	0.99062
		5.15774	2.97632e-05	0.00332	0.05346	0.94319		5.15774	0.00464	8.97007e-05	2.52053e-05	3.36173e-05	0.00139	0.0163	0.00354	0.06397	0.91001							5.15774	2.87598e-05	0.00341	0.03432	0.96224		5.15774	8.99248e-05	1.23515e-06	6.80631e-06	2.62746e-07	0.000150783	0.00177	0.000384182	0.00694	0.99067
		5.17014	2.9566e-05	0.00332	0.05337	0.94328		5.17014	0.00456	8.83154e-05	2.4822e-05	3.31664e-05	0.00138	0.01618	0.00353	0.06367	0.91054							5.17014	2.85756e-05	0.0034	0.03428	0.96229		5.17014	8.83917e-05	1.2165e-06	6.70511e-06	2.59332e-07	0.000149687	0.00175	0.000382201	0.00691	0.99071
		5.18254	2.93696e-05	0.00331	0.05328	0.94338		5.18254	0.00448	8.69552e-05	2.44472e-05	3.2724e-05	0.00137	0.01606	0.00351	0.06338	0.91106							5.18254	2.83911e-05	0.00339	0.03423	0.96235		5.18254	8.68929e-05	1.19821e-06	6.60604e-06	2.55991e-07	0.000148606	0.00174	0.000380247	0.00688	0.99076
		5.19494	2.91754e-05	0.0033	0.0532	0.94347		5.19494	0.0044	8.5632e-05	2.40794e-05	3.22903e-05	0.00136	0.01594	0.00349	0.06309	0.91158							5.19494	2.82094e-05	0.00339	0.03418	0.9624		5.19494	8.54278e-05	1.18028e-06	6.50858e-06	2.52687e-07	0.000147528	0.00173	0.000378289	0.00685	0.99081
		5.20734	2.8983e-05	0.00329	0.05311	0.94357		5.20734	0.00433	8.43357e-05	2.37203e-05	3.18651e-05	0.00135	0.01582	0.00347	0.0628	0.91209							5.20734	2.80303e-05	0.00338	0.03414	0.96245		5.20734	8.40002e-05	1.16282e-06	6.41366e-06	2.49477e-07	0.000146472	0.00172	0.000376392	0.00682	0.99085
		5.21973	2.8793e-05	0.00329	0.05302	0.94366		5.21973	0.00425	8.30648e-05	2.3368e-05	3.14481e-05	0.00134	0.01571	0.00345	0.06252	0.91259							5.21973	2.78532e-05	0.00337	0.03409	0.96251		5.21973	8.2598e-05	1.14563e-06	6.32041e-06	2.46307e-07	0.000145433	0.0017	0.000374495	0.00679	0.9909
		5.23213	2.86062e-05	0.00328	0.05294	0.94376		5.23213	0.00418	8.18158e-05	2.30218e-05	3.10365e-05	0.00133	0.01559	0.00343	0.06223	0.9131							5.23213	2.76771e-05	0.00337	0.03405	0.96256		5.23213	8.12288e-05	1.12881e-06	6.22887e-06	2.43194e-07	0.000144402	0.00169	0.000372616	0.00676	0.99094
		5.24453	2.84199e-05	0.00327	0.05285	0.94385		5.24453	0.00411	8.05931e-05	2.2683e-05	3.06337e-05	0.00132	0.01548	0.00341	0.06195	0.91359							5.24453	2.75054e-05	0.00336	0.03401	0.96261		5.24453	7.98829e-05	1.11228e-06	6.13914e-06	2.40134e-07	0.00014338	0.00168	0.00037075	0.00673	0.99099
		5.25693	2.82369e-05	0.00327	0.05277	0.94394		5.25693	0.00404	7.93932e-05	2.23515e-05	3.02389e-05	0.00131	0.01537	0.0034	0.06168	0.91407							5.25693	2.73325e-05	0.00335	0.03396	0.96266		5.25693	7.85723e-05	1.0962e-06	6.05151e-06	2.37145e-07	0.000142382	0.00167	0.000368926	0.0067	0.99103
		5.26933	2.8056e-05	0.00326	0.05268	0.94403		5.26933	0.00397	7.82234e-05	2.2026e-05	2.98506e-05	0.0013	0.01526	0.00338	0.0614	0.91456							5.26933	2.71639e-05	0.00335	0.03392	0.96271		5.26933	7.72908e-05	1.08037e-06	5.9652e-06	2.34199e-07	0.000141391	0.00166	0.000367112	0.00668	0.99107
		5.28173	2.78778e-05	0.00325	0.0526	0.94412		5.28173	0.00391	7.70722e-05	2.17069e-05	2.94694e-05	0.00129	0.01515	0.00336	0.06113	0.91503							5.28173	2.69961e-05	0.00334	0.03387	0.96276		5.28173	7.6037e-05	1.06482e-06	5.8807e-06	2.31301e-07	0.000140408	0.00165	0.00036531	0.00665	0.99112
		5.29413	2.77002e-05	0.00325	0.05252	0.94421		5.29413	0.00384	7.59424e-05	2.13944e-05	2.9095e-05	0.00128	0.01504	0.00334	0.06086	0.9155							5.29413	2.683e-05	0.00333	0.03383	0.96281		5.29413	7.48056e-05	1.04956e-06	5.79796e-06	2.2846e-07	0.000139439	0.00163	0.000363526	0.00662	0.99116
		5.30652	2.75249e-05	0.00324	0.05243	0.9443		5.30652	0.00378	7.48379e-05	2.1088e-05	2.87276e-05	0.00127	0.01493	0.00333	0.0606	0.91596							5.30652	2.66667e-05	0.00333	0.03379	0.96286		5.30652	7.36052e-05	1.03467e-06	5.71699e-06	2.2567e-07	0.000138488	0.00162	0.000361772	0.00659	0.9912
		5.31892	2.73525e-05	0.00323	0.05235	0.94439		5.31892	0.00372	7.37559e-05	2.07869e-05	2.83658e-05	0.00127	0.01483	0.00331	0.06033	0.91643							5.31892	2.65035e-05	0.00332	0.03375	0.96291		5.31892	7.24294e-05	1.02005e-06	5.63734e-06	2.2293e-07	0.000137547	0.00161	0.000360038	0.00657	0.99124
		5.33132	2.71808e-05	0.00322	0.05227	0.94448		5.33132	0.00366	7.26925e-05	2.04923e-05	2.80111e-05	0.00126	0.01472	0.00329	0.06007	0.91688							5.33132	2.63441e-05	0.00331	0.0337	0.96296		5.33132	7.12763e-05	1.00571e-06	5.5593e-06	2.2024e-07	0.000136619	0.0016	0.00035832	0.00654	0.99128
		5.34372	2.70118e-05	0.00322	0.05219	0.94457		5.34372	0.0036	7.16509e-05	2.02025e-05	2.76622e-05	0.00125	0.01462	0.00328	0.05981	0.91732							5.34372	2.61858e-05	0.00331	0.03366	0.963		5.34372	7.01491e-05	9.91629e-07	5.48258e-06	2.17589e-07	0.000135697	0.00159	0.000356599	0.00652	0.99132
		5.35612	2.68445e-05	0.00321	0.05211	0.94465		5.35612	0.00354	7.06297e-05	1.99189e-05	2.73199e-05	0.00124	0.01452	0.00326	0.05956	0.91777							5.35612	2.60279e-05	0.0033	0.03362	0.96305		5.35612	6.90435e-05	9.77823e-07	5.40747e-06	2.14989e-07	0.000134792	0.00158	0.000354938	0.00649	0.99136
		5.36852	2.66793e-05	0.0032	0.05203	0.94474		5.36852	0.00348	6.96279e-05	1.96411e-05	2.69837e-05	0.00123	0.01442	0.00324	0.0593	0.9182							5.36852	2.58726e-05	0.0033	0.03358	0.9631		5.36852	6.79642e-05	9.64302e-07	5.33361e-06	2.12432e-07	0.000133895	0.00157	0.000353268	0.00646	0.9914
		5.38091	2.65155e-05	0.0032	0.05195	0.94482		5.38091	0.00343	6.86449e-05	1.9368e-05	2.66542e-05	0.00122	0.01432	0.00323	0.05905	0.91864							5.38091	2.57199e-05	0.00329	0.03354	0.96315		5.38091	6.69056e-05	9.51012e-07	5.26116e-06	2.09919e-07	0.000133007	0.00156	0.000351604	0.00644	0.99144
		5.39331	2.63541e-05	0.00319	0.05187	0.94491		5.39331	0.00337	6.76809e-05	1.91002e-05	2.63281e-05	0.00121	0.01422	0.00321	0.0588	0.91906							5.39331	2.55679e-05	0.00328	0.0335	0.96319		5.39331	6.58677e-05	9.37976e-07	5.19014e-06	2.0745e-07	0.000132134	0.00155	0.000349974	0.00641	0.99148
		5.40571	2.61935e-05	0.00318	0.05179	0.945		5.40571	0.00332	6.6736e-05	1.88372e-05	2.60085e-05	0.0012	0.01413	0.00319	0.05856	0.91949							5.40571	2.54179e-05	0.00328	0.03346	0.96324		5.40571	6.48528e-05	9.25185e-07	5.1206e-06	2.05022e-07	0.000131268	0.00154	0.000348352	0.00639	0.99152
		5.41811	2.60355e-05	0.00318	0.05172	0.94508		5.41811	0.00327	6.58074e-05	1.85794e-05	2.56954e-05	0.0012	0.01403	0.00318	0.05831	0.9199							5.41811	2.52702e-05	0.00327	0.03342	0.96329		5.41811	6.3857e-05	9.12643e-07	5.05221e-06	2.02637e-07	0.000130415	0.00153	0.000346758	0.00636	0.99156
		5.43051	2.58792e-05	0.00317	0.05164	0.94516		5.43051	0.00322	6.48986e-05	1.83264e-05	2.53857e-05	0.00119	0.01394	0.00316	0.05807	0.92032							5.43051	2.51231e-05	0.00327	0.03338	0.96333		5.43051	6.28834e-05	9.00352e-07	4.98511e-06	2.00294e-07	0.000129573	0.00152	0.000345169	0.00634	0.9916
		5.44291	2.57227e-05	0.00317	0.05156	0.94525		5.44291	0.00317	6.40043e-05	1.80783e-05	2.50833e-05	0.00118	0.01384	0.00315	0.05783	0.92072							5.44291	2.49776e-05	0.00326	0.03334	0.96338		5.44291	6.19286e-05	8.88282e-07	4.9193e-06	1.97986e-07	0.00012874	0.00151	0.000343611	0.00632	0.99163
		5.4553	2.55709e-05	0.00316	0.05149	0.94533		5.4553	0.00312	6.31304e-05	1.78348e-05	2.47855e-05	0.00117	0.01375	0.00313	0.05759	0.92113							5.4553	2.48337e-05	0.00325	0.0333	0.96342		5.4553	6.09946e-05	8.76432e-07	4.85462e-06	1.95718e-07	0.000127918	0.0015	0.00034206	0.00629	0.99167
		5.4677	2.54192e-05	0.00315	0.05141	0.94541		5.4677	0.00307	6.22692e-05	1.75947e-05	2.44929e-05	0.00116	0.01366	0.00312	0.05736	0.92152							5.4677	2.46896e-05	0.00325	0.03325	0.96347		5.4677	6.00775e-05	8.64787e-07	4.79114e-06	1.93496e-07	0.000127102	0.00149	0.00034052	0.00627	0.99171
		5.4801	2.52694e-05	0.00315	0.05134	0.94549		5.4801	0.00302	6.14267e-05	1.736e-05	2.42052e-05	0.00116	0.01357	0.0031	0.05712	0.92192							5.4801	2.45486e-05	0.00324	0.03322	0.96352		5.4801	5.91788e-05	8.53375e-07	4.72885e-06	1.91297e-07	0.000126299	0.00148	0.000339003	0.00624	0.99174
		5.4925	2.5121e-05	0.00314	0.05126	0.94557		5.4925	0.00298	6.05984e-05	1.71303e-05	2.39215e-05	0.00115	0.01348	0.00309	0.05689	0.92231							5.4925	2.44098e-05	0.00324	0.03318	0.96356		5.4925	5.82981e-05	8.42158e-07	4.66762e-06	1.89136e-07	0.000125504	0.00147	0.000337491	0.00622	0.99178
		5.5049	2.49741e-05	0.00313	0.05119	0.94565		5.5049	0.00293	5.97845e-05	1.6904e-05	2.36437e-05	0.00114	0.0134	0.00307	0.05666	0.92269							5.5049	2.42716e-05	0.00323	0.03314	0.96361		5.5049	5.74362e-05	8.31155e-07	4.60757e-06	1.87013e-07	0.00012472	0.00146	0.000336005	0.0062	0.99182
		5.5173	2.48281e-05	0.00313	0.05111	0.94573		5.5173	0.00289	5.89868e-05	1.66814e-05	2.33688e-05	0.00113	0.01331	0.00306	0.05643	0.92308							5.5173	2.41358e-05	0.00322	0.0331	0.96365		5.5173	5.659e-05	8.20333e-07	4.54849e-06	1.84935e-07	0.000123943	0.00145	0.000334536	0.00617	0.99185
		5.5297	2.46841e-05	0.00312	0.05104	0.94581		5.5297	0.00285	5.82028e-05	1.64633e-05	2.31006e-05	0.00113	0.01322	0.00304	0.05621	0.92345							5.5297	2.40001e-05	0.00322	0.03306	0.9637		5.5297	5.57616e-05	8.0972e-07	4.49062e-06	1.82885e-07	0.000123177	0.00145	0.000333071	0.00615	0.99188
		5.54209	2.45435e-05	0.00312	0.05097	0.94589		5.54209	0.0028	5.74345e-05	1.62498e-05	2.2836e-05	0.00112	0.01314	0.00303	0.05599	0.92383							5.54209	2.38659e-05	0.00321	0.03302	0.96374		5.54209	5.49489e-05	7.99307e-07	4.43366e-06	1.8086e-07	0.000122419	0.00144	0.000331618	0.00613	0.99192
		5.55449	2.44015e-05	0.00311	0.0509	0.94597		5.55449	0.00276	5.66785e-05	1.60392e-05	2.25748e-05	0.00111	0.01305	0.00302	0.05577	0.9242							5.55449	2.37337e-05	0.00321	0.03299	0.96378		5.55449	5.41521e-05	7.89068e-07	4.37771e-06	1.78868e-07	0.000121666	0.00143	0.000330192	0.00611	0.99195
		5.56689	2.42633e-05	0.0031	0.05083	0.94605		5.56689	0.00272	5.59373e-05	1.58322e-05	2.23182e-05	0.00111	0.01297	0.003	0.05555	0.92456							5.56689	2.3604e-05	0.0032	0.03295	0.96382		5.56689	5.33702e-05	7.79007e-07	4.32281e-06	1.76917e-07	0.000120933	0.00142	0.000328775	0.00609	0.99199
		5.57929	2.41247e-05	0.0031	0.05075	0.94612		5.57929	0.00268	5.52085e-05	1.5629e-05	2.20667e-05	0.0011	0.01289	0.00299	0.05533	0.92492							5.57929	2.34726e-05	0.0032	0.03291	0.96387		5.57929	5.26043e-05	7.69134e-07	4.26888e-06	1.75e-07	0.000120197	0.00141	0.000327369	0.00606	0.99202
		5.59169	2.39882e-05	0.00309	0.05068	0.9462		5.59169	0.00264	5.44934e-05	1.54298e-05	2.18188e-05	0.00109	0.01281	0.00297	0.05511	0.92528							5.59169	2.33446e-05	0.00319	0.03287	0.96391		5.59169	5.18523e-05	7.59442e-07	4.21588e-06	1.73101e-07	0.000119477	0.0014	0.00032598	0.00604	0.99205
		5.60409	2.38533e-05	0.00309	0.05061	0.94628		5.60409	0.0026	5.37906e-05	1.52335e-05	2.15745e-05	0.00108	0.01273	0.00296	0.0549	0.92563							5.60409	2.32175e-05	0.00319	0.03284	0.96395		5.60409	5.11133e-05	7.4988e-07	4.16359e-06	1.71238e-07	0.000118752	0.00139	0.000324595	0.00602	0.99209
		5.61648	2.372e-05	0.00308	0.05054	0.94635		5.61648	0.00257	5.30994e-05	1.50411e-05	2.1334e-05	0.00108	0.01265	0.00295	0.05469	0.92598							5.61648	2.30921e-05	0.00318	0.0328	0.96399		5.61648	5.03913e-05	7.40531e-07	4.11247e-06	1.69408e-07	0.000118048	0.00139	0.000323234	0.006	0.99212
		5.62888	2.35874e-05	0.00307	0.05047	0.94643		5.62888	0.00253	5.24217e-05	1.48518e-05	2.10978e-05	0.00107	0.01257	0.00293	0.05448	0.92633							5.62888	2.29675e-05	0.00317	0.03276	0.96404		5.62888	4.96841e-05	7.31357e-07	4.06228e-06	1.6761e-07	0.000117356	0.00138	0.000321896	0.00598	0.99215
		5.64128	2.34563e-05	0.00307	0.05041	0.9465		5.64128	0.00249	5.17567e-05	1.46666e-05	2.08662e-05	0.00106	0.01249	0.00292	0.05427	0.92667							5.64128	2.28444e-05	0.00317	0.03273	0.96408		5.64128	4.89867e-05	7.22305e-07	4.01273e-06	1.65824e-07	0.000116661	0.00137	0.00032055	0.00596	0.99218
		5.65368	2.33275e-05	0.00306	0.05033	0.94658		5.65368	0.00246	5.11032e-05	1.44844e-05	2.0638e-05	0.00106	0.01242	0.00291	0.05407	0.92701							5.65368	2.27225e-05	0.00316	0.03269	0.96412		5.65368	4.83038e-05	7.13417e-07	3.96415e-06	1.6408e-07	0.000115974	0.00136	0.000319223	0.00594	0.99221
		5.66608	2.31984e-05	0.00306	0.05027	0.94665		5.66608	0.00242	5.04597e-05	1.43046e-05	2.04125e-05	0.00105	0.01234	0.0029	0.05386	0.92734							5.66608	2.26014e-05	0.00316	0.03266	0.96416		5.66608	4.76347e-05	7.04705e-07	3.91644e-06	1.62363e-07	0.000115299	0.00135	0.00031792	0.00592	0.99224
		5.67848	2.30719e-05	0.00305	0.0502	0.94673		5.67848	0.00239	4.98261e-05	1.41276e-05	2.01902e-05	0.00104	0.01227	0.00288	0.05366	0.92767							5.67848	2.24815e-05	0.00315	0.03262	0.9642		5.67848	4.69768e-05	6.9614e-07	3.86949e-06	1.60664e-07	0.000114629	0.00135	0.000316618	0.0059	0.99227
		5.69087	2.29465e-05	0.00305	0.05013	0.9468		5.69087	0.00235	4.92076e-05	1.39548e-05	1.9973e-05	0.00104	0.01219	0.00287	0.05346	0.928							5.69087	2.23629e-05	0.00315	0.03259	0.96424		5.69087	4.6331e-05	6.87682e-07	3.82326e-06	1.59e-07	0.000113967	0.00134	0.000315326	0.00588	0.99231
		5.70327	2.28216e-05	0.00304	0.05007	0.94687		5.70327	0.00232	4.85952e-05	1.37841e-05	1.97574e-05	0.00103	0.01212	0.00286	0.05326	0.92833							5.70327	2.22467e-05	0.00314	0.03255	0.96428		5.70327	4.56977e-05	6.79401e-07	3.77788e-06	1.57353e-07	0.000113316	0.00133	0.00031405	0.00586	0.99234
		5.71567	2.26985e-05	0.00304	0.05	0.94694		5.71567	0.00229	4.79974e-05	1.36171e-05	1.95468e-05	0.00103	0.01205	0.00284	0.05306	0.92865							5.71567	2.213e-05	0.00314	0.03252	0.96432		5.71567	4.50759e-05	6.7122e-07	3.73323e-06	1.55737e-07	0.000112665	0.00132	0.000312784	0.00584	0.99236
		5.72807	2.25765e-05	0.00303	0.04993	0.94701		5.72807	0.00226	4.74072e-05	1.3452e-05	1.93387e-05	0.00102	0.01198	0.00283	0.05287	0.92897							5.72807	2.20147e-05	0.00313	0.03248	0.96436		5.72807	4.44643e-05	6.63193e-07	3.68924e-06	1.54141e-07	0.000112024	0.00132	0.000311526	0.00582	0.9924
		5.74047	2.24559e-05	0.00302	0.04986	0.94709		5.74047	0.00223	4.68273e-05	1.32901e-05	1.91335e-05	0.00101	0.01191	0.00282	0.05267	0.92928							5.74047	2.19011e-05	0.00313	0.03245	0.9644		5.74047	4.38651e-05	6.55294e-07	3.64604e-06	1.52568e-07	0.00011139	0.00131	0.000310282	0.0058	0.99242
		5.75287	2.23365e-05	0.00302	0.0498	0.94716		5.75287	0.0022	4.62559e-05	1.31306e-05	1.89318e-05	0.00101	0.01184	0.00281	0.05248	0.92959							5.75287	2.17881e-05	0.00312	0.03241	0.96444		5.75287	4.32772e-05	6.4757e-07	3.60359e-06	1.51026e-07	0.000110765	0.0013	0.000309054	0.00578	0.99245
		5.76526	2.22182e-05	0.00301	0.04974	0.94723		5.76526	0.00217	4.56962e-05	1.29742e-05	1.87333e-05	0.001	0.01177	0.0028	0.05229	0.9299							5.76526	2.16768e-05	0.00312	0.03238	0.96448		5.76526	4.2701e-05	6.39968e-07	3.56194e-06	1.49511e-07	0.000110148	0.00129	0.000307844	0.00576	0.99248
		5.77766	2.21007e-05	0.00301	0.04967	0.9473		5.77766	0.00214	4.5148e-05	1.28205e-05	1.85378e-05	0.000995365	0.0117	0.00278	0.0521	0.93021							5.77766	2.15662e-05	0.00311	0.03235	0.96452		5.77766	4.21324e-05	6.32437e-07	3.52076e-06	1.48007e-07	0.000109534	0.00129	0.000306632	0.00574	0.99251
		5.79006	2.19846e-05	0.003	0.04961	0.94737		5.79006	0.00211	4.46052e-05	1.2669e-05	1.83455e-05	0.000989569	0.01163	0.00277	0.05192	0.93051							5.79006	2.14565e-05	0.00311	0.03231	0.96456		5.79006	4.15748e-05	6.25084e-07	3.4804e-06	1.46531e-07	0.000108929	0.00128	0.000305438	0.00572	0.99254
		5.80246	2.187e-05	0.003	0.04955	0.94743		5.80246	0.00208	4.40738e-05	1.25199e-05	1.81553e-05	0.000983752	0.01156	0.00276	0.05173	0.93081							5.80246	2.13476e-05	0.0031	0.03228	0.9646		5.80246	4.10279e-05	6.17857e-07	3.44068e-06	1.45075e-07	0.00010833	0.00127	0.000304254	0.0057	0.99257
		5.81486	2.17559e-05	0.00299	0.04948	0.9475		5.81486	0.00205	4.35494e-05	1.23736e-05	1.79686e-05	0.000978057	0.0115	0.00275	0.05155	0.9311							5.81486	2.12402e-05	0.0031	0.03224	0.96464		5.81486	4.04937e-05	6.10729e-07	3.40161e-06	1.43644e-07	0.000107736	0.00127	0.000303083	0.00568	0.99259
		5.82726	2.16431e-05	0.00299	0.04942	0.94757		5.82726	0.00202	4.30348e-05	1.22299e-05	1.7785e-05	0.000972416	0.01143	0.00274	0.05136	0.9314							5.82726	2.11339e-05	0.00309	0.03221	0.96467		5.82726	3.9964e-05	6.03705e-07	3.3631e-06	1.4223e-07	0.000107147	0.00126	0.000301915	0.00567	0.99262
		5.83966	2.15318e-05	0.00298	0.04936	0.94764		5.83966	0.002	4.25285e-05	1.2088e-05	1.76034e-05	0.000966831	0.01137	0.00273	0.05118	0.93169							5.83966	2.10284e-05	0.00309	0.03218	0.96471		5.83966	3.94451e-05	5.96799e-07	3.32531e-06	1.4084e-07	0.000106566	0.00125	0.000300764	0.00565	0.99265
		5.85205	2.14209e-05	0.00298	0.04929	0.94771		5.85205	0.00197	4.2031e-05	1.19485e-05	1.74247e-05	0.000961304	0.0113	0.00272	0.051	0.93198							5.85205	2.09241e-05	0.00308	0.03215	0.96475		5.85205	3.89364e-05	5.90017e-07	3.28799e-06	1.39469e-07	0.000105992	0.00125	0.000299622	0.00563	0.99268
		5.86445	2.13117e-05	0.00297	0.04923	0.94777		5.86445	0.00194	4.15405e-05	1.18115e-05	1.72492e-05	0.000955849	0.01124	0.0027	0.05082	0.93226							5.86445	2.08204e-05	0.00308	0.03211	0.96479		5.86445	3.84358e-05	5.83324e-07	3.25143e-06	1.3812e-07	0.000105425	0.00124	0.000298492	0.00561	0.9927
		5.87685	2.12028e-05	0.00297	0.04917	0.94784		5.87685	0.00192	4.10577e-05	1.16767e-05	1.70758e-05	0.000950438	0.01118	0.00269	0.05065	0.93254							5.87685	2.07179e-05	0.00307	0.03208	0.96482		5.87685	3.79452e-05	5.76746e-07	3.21527e-06	1.36785e-07	0.000104859	0.00123	0.000297375	0.00559	0.99273
		5.88925	2.10957e-05	0.00296	0.04911	0.94791		5.88925	0.00189	4.05854e-05	1.15439e-05	1.69051e-05	0.000945089	0.01111	0.00268	0.05047	0.93282							5.88925	2.06163e-05	0.00307	0.03205	0.96486		5.88925	3.74613e-05	5.70298e-07	3.17972e-06	1.35473e-07	0.000104303	0.00123	0.000296255	0.00558	0.99276
		5.90165	2.09893e-05	0.00296	0.04905	0.94797		5.90165	0.00187	4.01173e-05	1.1413e-05	1.67366e-05	0.000939765	0.01105	0.00267	0.0503	0.9331							5.90165	2.05154e-05	0.00306	0.03202	0.9649		5.90165	3.69877e-05	5.63935e-07	3.14492e-06	1.3418e-07	0.000103751	0.00122	0.000295141	0.00556	0.99278
		5.91405	2.08836e-05	0.00295	0.04899	0.94804		5.91405	0.00184	3.96592e-05	1.12847e-05	1.6571e-05	0.000934545	0.01099	0.00266	0.05013	0.93337							5.91405	2.04162e-05	0.00306	0.03198	0.96493		5.91405	3.65199e-05	5.57652e-07	3.11042e-06	1.32903e-07	0.000103206	0.00121	0.000294051	0.00554	0.99281
		5.92644	2.07803e-05	0.00295	0.04893	0.9481		5.92644	0.00182	3.92065e-05	1.11581e-05	1.64075e-05	0.000929335	0.01093	0.00265	0.04996	0.93365							5.92644	2.03174e-05	0.00306	0.03195	0.96497		5.92644	3.60633e-05	5.5149e-07	3.07654e-06	1.31647e-07	0.000102664	0.00121	0.00029298	0.00552	0.99283
		5.93884	2.06756e-05	0.00294	0.04887	0.94817		5.93884	0.0018	3.87636e-05	1.10336e-05	1.62467e-05	0.000924217	0.01087	0.00264	0.04979	0.93391							5.93884	2.02195e-05	0.00305	0.03192	0.96501		5.93884	3.5613e-05	5.45428e-07	3.04327e-06	1.30409e-07	0.000102131	0.0012	0.000291896	0.00551	0.99286
		5.95124	2.05731e-05	0.00294	0.04881	0.94823		5.95124	0.00177	3.83246e-05	1.09108e-05	1.60878e-05	0.000919125	0.01081	0.00263	0.04962	0.93418							5.95124	2.01219e-05	0.00305	0.03189	0.96504		5.95124	3.51697e-05	5.39451e-07	3.01048e-06	1.29186e-07	0.0001016	0.0012	0.000290823	0.00549	0.99288
		5.96364	2.04719e-05	0.00293	0.04875	0.9483		5.96364	0.00175	3.78941e-05	1.07903e-05	1.59315e-05	0.0009141	0.01075	0.00262	0.04945	0.93444							5.96364	2.00268e-05	0.00304	0.03186	0.96508		5.96364	3.4735e-05	5.33589e-07	2.97812e-06	1.27984e-07	0.000101078	0.00119	0.000289782	0.00547	0.99291
		5.97604	2.03706e-05	0.00293	0.04869	0.94836		5.97604	0.00173	3.74714e-05	1.06715e-05	1.57771e-05	0.000909108	0.0107	0.00261	0.04929	0.93471							5.97604	1.99317e-05	0.00304	0.03183	0.96511		5.97604	3.43071e-05	5.27799e-07	2.94643e-06	1.26796e-07	0.00010056	0.00118	0.00028873	0.00546	0.99293
		5.98844	2.02714e-05	0.00292	0.04863	0.94842		5.98844	0.00171	3.70544e-05	1.05546e-05	1.56252e-05	0.000904173	0.01064	0.0026	0.04912	0.93497							5.98844	1.98364e-05	0.00303	0.0318	0.96515		5.98844	3.38859e-05	5.22087e-07	2.91502e-06	1.25624e-07	0.000100046	0.00118	0.000287693	0.00544	0.99296
		6.00083	2.01731e-05	0.00292	0.04857	0.94849		6.00083	0.00169	3.66441e-05	1.04396e-05	1.54761e-05	0.000899311	0.01058	0.00259	0.04896	0.93522							6.00083	1.97441e-05	0.00303	0.03177	0.96518		6.00083	3.34717e-05	5.16481e-07	2.88414e-06	1.24471e-07	9.95389e-05	0.00117	0.000286664	0.00542	0.99298
		6.01323	2.00746e-05	0.00291	0.04852	0.94855		6.01323	0.00167	3.62401e-05	1.03261e-05	1.53273e-05	0.000894473	0.01053	0.00258	0.0488	0.93548							6.01323	1.9651e-05	0.00302	0.03174	0.96522		6.01323	3.30647e-05	5.10958e-07	2.85379e-06	1.23331e-07	9.90342e-05	0.00117	0.000285653	0.00541	0.99301
		6.02563	1.99789e-05	0.00291	0.04846	0.94861		6.02563	0.00164	3.58417e-05	1.02146e-05	1.51819e-05	0.000889684	0.01047	0.00257	0.04864	0.93573							6.02563	1.95585e-05	0.00302	0.03171	0.96525		6.02563	3.26648e-05	5.0551e-07	2.82383e-06	1.22209e-07	9.85353e-05	0.00116	0.000284634	0.00539	0.99303
		6.03803	1.98825e-05	0.0029	0.0484	0.94867		6.03803	0.00162	3.54507e-05	1.01047e-05	1.50386e-05	0.000884955	0.01042	0.00256	0.04848	0.93598							6.03803	1.94674e-05	0.00302	0.03168	0.96529		6.03803	3.22712e-05	5.00145e-07	2.79435e-06	1.21101e-07	9.80424e-05	0.00115	0.000283636	0.00538	0.99305
		6.05043	1.97867e-05	0.0029	0.04835	0.94873		6.05043	0.0016	3.50644e-05	9.99644e-06	1.48975e-05	0.000880272	0.01036	0.00255	0.04832	0.93622							6.05043	1.93779e-05	0.00301	0.03165	0.96532		6.05043	3.18848e-05	4.9487e-07	2.76543e-06	1.20009e-07	9.75544e-05	0.00115	0.000282642	0.00536	0.99308
		6.06283	1.96923e-05	0.0029	0.04829	0.9488		6.06283	0.00158	3.46841e-05	9.8899e-06	1.47574e-05	0.000875628	0.01031	0.00254	0.04817	0.93647							6.06283	1.92888e-05	0.00301	0.03162	0.96536		6.06283	3.15051e-05	4.89681e-07	2.73677e-06	1.18932e-07	9.70707e-05	0.00114	0.000281653	0.00534	0.9931
		6.07523	1.95991e-05	0.00289	0.04823	0.94886		6.07523	0.00157	3.43115e-05	9.78501e-06	1.462e-05	0.000871044	0.01025	0.00253	0.04801	0.93671							6.07523	1.92005e-05	0.003	0.03159	0.96539		6.07523	3.11308e-05	4.84561e-07	2.70864e-06	1.17873e-07	9.65922e-05	0.00114	0.000280674	0.00533	0.99312
		6.08762	1.95065e-05	0.00289	0.04818	0.94892		6.08762	0.00155	3.3943e-05	9.68155e-06	1.44837e-05	0.000866489	0.0102	0.00252	0.04786	0.93695							6.08762	1.91122e-05	0.003	0.03156	0.96542		6.08762	3.07619e-05	4.79524e-07	2.68091e-06	1.1682e-07	9.61186e-05	0.00113	0.000279705	0.00531	0.99314
		6.10002	1.94144e-05	0.00288	0.04812	0.94898		6.10002	0.00153	3.35795e-05	9.57976e-06	1.43498e-05	0.000861988	0.01015	0.00251	0.0477	0.93719							6.10002	1.90251e-05	0.00299	0.03153	0.96546		6.10002	3.04002e-05	4.74548e-07	2.65356e-06	1.1579e-07	9.56478e-05	0.00113	0.000278743	0.0053	0.99317
		6.11242	1.93235e-05	0.00288	0.04807	0.94904		6.11242	0.00151	3.32221e-05	9.47903e-06	1.42181e-05	0.000857514	0.0101	0.0025	0.04755	0.93743							6.11242	1.89385e-05	0.00299	0.0315	0.96549		6.11242	3.00436e-05	4.69657e-07	2.6266e-06	1.14767e-07	9.5184e-05	0.00112	0.0002778	0.00528	0.99319
		6.12482	1.92336e-05	0.00287	0.04801	0.9491		6.12482	0.00149	3.28717e-05	9.38096e-06	1.4088e-05	0.000853119	0.01004	0.00249	0.0474	0.93766							6.12482	1.88538e-05	0.00299	0.03147	0.96552		6.12482	2.96922e-05	4.64822e-07	2.60003e-06	1.13759e-07	9.47208e-05	0.00112	0.000276847	0.00527	0.99321
		6.13722	1.91442e-05	0.00287	0.04796	0.94916		6.13722	0.00147	3.25242e-05	9.28294e-06	1.39592e-05	0.000848688	0.00999	0.00248	0.04725	0.93789							6.13722	1.87689e-05	0.00298	0.03144	0.96556		6.13722	2.93491e-05	4.601e-07	2.57397e-06	1.1277e-07	9.42686e-05	0.00111	0.000275925	0.00525	0.99323
		6.14962	1.9056e-05	0.00286	0.0479	0.94921		6.14962	0.00146	3.21831e-05	9.18721e-06	1.3833e-05	0.000844419	0.00994	0.00247	0.04711	0.93812							6.14962	1.8685e-05	0.00298	0.03141	0.96559		6.14962	2.90095e-05	4.55415e-07	2.54817e-06	1.11794e-07	9.38175e-05	0.0011	0.000274988	0.00524	0.99326
		6.16201	1.89677e-05	0.00286	0.04785	0.94927		6.16201	0.00144	3.18486e-05	9.09343e-06	1.37087e-05	0.00084015	0.00989	0.00246	0.04696	0.93835							6.16201	1.86018e-05	0.00297	0.03138	0.96562		6.16201	2.86744e-05	4.5079e-07	2.52273e-06	1.10818e-07	9.33676e-05	0.0011	0.000274062	0.00522	0.99328
		6.17441	1.8881e-05	0.00286	0.0478	0.94933		6.17441	0.00142	3.15152e-05	9e-06	1.35846e-05	0.000835871	0.00984	0.00246	0.04681	0.93858							6.17441	1.85187e-05	0.00297	0.03136	0.96566		6.17441	2.83458e-05	4.46238e-07	2.49765e-06	1.09865e-07	9.29225e-05	0.00109	0.000273138	0.00521	0.9933
		6.18681	1.87945e-05	0.00285	0.04774	0.94939		6.18681	0.0014	3.11904e-05	8.9081e-06	1.34636e-05	0.000831665	0.0098	0.00245	0.04667	0.9388							6.18681	1.84376e-05	0.00297	0.03133	0.96569		6.18681	2.80228e-05	4.41768e-07	2.47302e-06	1.08922e-07	9.24851e-05	0.00109	0.00027224	0.00519	0.99332
		6.19921	1.87091e-05	0.00285	0.04769	0.94945		6.19921	0.00139	3.08672e-05	8.81774e-06	1.33428e-05	0.000827461	0.00975	0.00244	0.04652	0.93902							6.19921	1.83561e-05	0.00296	0.0313	0.96572		6.19921	2.77057e-05	4.37372e-07	2.44882e-06	1.08e-07	9.20512e-05	0.00108	0.000271345	0.00518	0.99334
		6.21161	1.86242e-05	0.00284	0.04764	0.9495		6.21161	0.00137	3.05504e-05	8.72868e-06	1.32246e-05	0.000823345	0.0097	0.00243	0.04638	0.93924							6.21161	1.82759e-05	0.00296	0.03127	0.96575		6.21161	2.73904e-05	4.32997e-07	2.42471e-06	1.07074e-07	9.16183e-05	0.00108	0.000270438	0.00517	0.99336
		6.22401	1.85397e-05	0.00284	0.04758	0.94956		6.22401	0.00136	3.02393e-05	8.64088e-06	1.31079e-05	0.000819291	0.00965	0.00242	0.04624	0.93946							6.22401	1.81964e-05	0.00295	0.03125	0.96578		6.22401	2.70837e-05	4.28735e-07	2.40115e-06	1.06177e-07	9.1195e-05	0.00107	0.00026957	0.00515	0.99338
		6.2364	1.84568e-05	0.00283	0.04753	0.94962		6.2364	0.00134	2.99313e-05	8.55439e-06	1.29927e-05	0.000815235	0.0096	0.00241	0.0461	0.93968							6.2364	1.81168e-05	0.00295	0.03122	0.96582		6.2364	2.67799e-05	4.24501e-07	2.37786e-06	1.05285e-07	9.07729e-05	0.00107	0.000268688	0.00514	0.9934
		6.2488	1.83754e-05	0.00283	0.04748	0.94967		6.2488	0.00133	2.96285e-05	8.46914e-06	1.28789e-05	0.000811262	0.00956	0.0024	0.04596	0.93989							6.2488	1.8038e-05	0.00295	0.03119	0.96585		6.2488	2.64809e-05	4.20337e-07	2.3549e-06	1.04397e-07	9.03551e-05	0.00106	0.000267818	0.00512	0.99342
		6.2612	1.82923e-05	0.00283	0.04743	0.94973		6.2612	0.00131	2.933e-05	8.38515e-06	1.27666e-05	0.000807303	0.00951	0.00239	0.04583	0.9401							6.2612	1.7961e-05	0.00294	0.03116	0.96588		6.2612	2.61863e-05	4.16231e-07	2.33222e-06	1.0353e-07	8.99395e-05	0.00106	0.000266953	0.00511	0.99344
		6.2736	1.82127e-05	0.00282	0.04738	0.94978		6.2736	0.0013	2.90354e-05	8.30206e-06	1.26561e-05	0.00080336	0.00947	0.00239	0.04569	0.94031							6.2736	1.78842e-05	0.00294	0.03114	0.96591		6.2736	2.58967e-05	4.1218e-07	2.30991e-06	1.0267e-07	8.95296e-05	0.00105	0.000266095	0.0051	0.99346
		6.286	1.81311e-05	0.00282	0.04733	0.94984		6.286	0.00128	2.87447e-05	8.22043e-06	1.25466e-05	0.000799427	0.00942	0.00238	0.04555	0.94052							6.286	1.78065e-05	0.00293	0.03111	0.96594		6.286	2.56118e-05	4.08193e-07	2.28788e-06	1.01822e-07	8.91186e-05	0.00105	0.000265247	0.00508	0.99348
		6.2984	1.80517e-05	0.00281	0.04728	0.94989		6.2984	0.00127	2.84597e-05	8.14019e-06	1.24389e-05	0.000795615	0.00938	0.00237	0.04542	0.94073							6.2984	1.7731e-05	0.00293	0.03108	0.96597		6.2984	2.53298e-05	4.04245e-07	2.26611e-06	1.0098e-07	8.87154e-05	0.00105	0.000264396	0.00507	0.9935
		6.3108	1.7973e-05	0.00281	0.04723	0.94995		6.3108	0.00125	2.81764e-05	8.06043e-06	1.23321e-05	0.000791772	0.00933	0.00236	0.04528	0.94093							6.3108	1.7657e-05	0.00293	0.03105	0.966		6.3108	2.50532e-05	4.00369e-07	2.24473e-06	1.00154e-07	8.83133e-05	0.00104	0.000263557	0.00506	0.99352
		6.32319	1.78939e-05	0.0028	0.04718	0.95		6.32319	0.00124	2.78991e-05	7.98235e-06	1.22269e-05	0.000787962	0.00929	0.00235	0.04515	0.94114							6.32319	1.75819e-05	0.00292	0.03103	0.96603		6.32319	2.47812e-05	3.96542e-07	2.2236e-06	9.93376e-08	8.79204e-05	0.00104	0.000262731	0.00504	0.99354
		6.33559	1.7816e-05	0.0028	0.04712	0.95006		6.33559	0.00122	2.76248e-05	7.90499e-06	1.21232e-05	0.000784229	0.00924	0.00235	0.04502	0.94134							6.33559	1.7508e-05	0.00292	0.031	0.96606		6.33559	2.45134e-05	3.9278e-07	2.20284e-06	9.85316e-08	8.75269e-05	0.00103	0.000261911	0.00503	0.99356
		6.34799	1.77387e-05	0.0028	0.04707	0.95011		6.34799	0.00121	2.73552e-05	7.82928e-06	1.20211e-05	0.000780536	0.0092	0.00234	0.04489	0.94154							6.34799	1.74348e-05	0.00291	0.03098	0.96609		6.34799	2.42486e-05	3.89063e-07	2.18227e-06	9.77359e-08	8.71375e-05	0.00103	0.00026109	0.00502	0.99358
		6.36039	1.76628e-05	0.00279	0.04703	0.95016		6.36039	0.0012	2.70887e-05	7.75405e-06	1.19199e-05	0.000776856	0.00916	0.00233	0.04476	0.94174							6.36039	1.73614e-05	0.00291	0.03095	0.96612		6.36039	2.39888e-05	3.85387e-07	2.16202e-06	9.69508e-08	8.67543e-05	0.00102	0.000260281	0.005	0.9936
		6.37279	1.75868e-05	0.00279	0.04698	0.95022		6.37279	0.00118	2.68257e-05	7.6799e-06	1.18197e-05	0.000773166	0.00911	0.00232	0.04463	0.94193							6.37279	1.72896e-05	0.00291	0.03092	0.96615		6.37279	2.37324e-05	3.81776e-07	2.14207e-06	9.61734e-08	8.63741e-05	0.00102	0.000259479	0.00499	0.99362
		6.38519	1.75113e-05	0.00278	0.04693	0.95027		6.38519	0.00117	2.65665e-05	7.60698e-06	1.17212e-05	0.000769563	0.00907	0.00231	0.0445	0.94213							6.38519	1.7219e-05	0.0029	0.0309	0.96618		6.38519	2.34798e-05	3.78209e-07	2.12232e-06	9.54047e-08	8.59936e-05	0.00101	0.000258677	0.00498	0.99364
		6.39758	1.74377e-05	0.00278	0.04688	0.95032		6.39758	0.00116	2.63113e-05	7.53499e-06	1.16238e-05	0.000765966	0.00903	0.00231	0.04437	0.94232							6.39758	1.71469e-05	0.0029	0.03087	0.96621		6.39758	2.32305e-05	3.74666e-07	2.10286e-06	9.46459e-08	8.56166e-05	0.00101	0.000257879	0.00496	0.99366
		6.40998	1.73639e-05	0.00278	0.04683	0.95037		6.40998	0.00115	2.60596e-05	7.46417e-06	1.1528e-05	0.000762443	0.00899	0.0023	0.04425	0.94251							6.40998	1.70774e-05	0.0029	0.03085	0.96624		6.40998	2.29856e-05	3.71204e-07	2.08367e-06	9.39006e-08	8.52458e-05	0.00101	0.000257096	0.00495	0.99368
		6.42238	1.72901e-05	0.00277	0.04678	0.95043		6.42238	0.00113	2.58112e-05	7.3938e-06	1.14328e-05	0.000758902	0.00895	0.00229	0.04412	0.94271							6.42238	1.70075e-05	0.00289	0.03082	0.96627		6.42238	2.27438e-05	3.67781e-07	2.06474e-06	9.31585e-08	8.48763e-05	0.001	0.000256314	0.00494	0.99369
		6.43478	1.72171e-05	0.00277	0.04673	0.95048		6.43478	0.00112	2.55652e-05	7.32485e-06	1.13391e-05	0.000755426	0.00891	0.00228	0.044	0.94289							6.43478	1.69378e-05	0.00289	0.03079	0.9663		6.43478	2.2506e-05	3.64394e-07	2.04608e-06	9.24295e-08	8.4511e-05	0.00099653	0.00025554	0.00493	0.99371
		6.44718	1.7145e-05	0.00277	0.04669	0.95053		6.44718	0.00111	2.53233e-05	7.25671e-06	1.12464e-05	0.000751962	0.00887	0.00228	0.04387	0.94308							6.44718	1.68696e-05	0.00289	0.03077	0.96633		6.44718	2.22715e-05	3.61064e-07	2.02766e-06	9.17097e-08	8.41486e-05	0.000992299	0.000254771	0.00491	0.99373
		6.45958	1.70735e-05	0.00276	0.04664	0.95058		6.45958	0.0011	2.50862e-05	7.18945e-06	1.11551e-05	0.000748525	0.00883	0.00227	0.04375	0.94327							6.45958	1.68015e-05	0.00288	0.03074	0.96636		6.45958	2.20405e-05	3.57777e-07	2.00947e-06	9.09956e-08	8.37895e-05	0.000988127	0.000254004	0.0049	0.99375
		6.47197	1.70024e-05	0.00276	0.04659	0.95063		6.47197	0.00109	2.48509e-05	7.12332e-06	1.10649e-05	0.000745147	0.00879	0.00226	0.04363	0.94345							6.47197	1.67338e-05	0.00288	0.03072	0.96639		6.47197	2.18131e-05	3.54537e-07	1.99154e-06	9.02941e-08	8.34347e-05	0.000983984	0.000253257	0.00489	0.99377
		6.48437	1.69326e-05	0.00275	0.04655	0.95068		6.48437	0.00107	2.46191e-05	7.05774e-06	1.09757e-05	0.000741772	0.00875	0.00225	0.04351	0.94363							6.48437	1.6667e-05	0.00287	0.03069	0.96641		6.48437	2.15884e-05	3.5132e-07	1.97383e-06	8.95978e-08	8.30833e-05	0.000979871	0.000252498	0.00488	0.99378
		6.49677	1.68625e-05	0.00275	0.0465	0.95073		6.49677	0.00106	2.43907e-05	6.99314e-06	1.08876e-05	0.000738448	0.00871	0.00225	0.04339	0.94381							6.49677	1.66004e-05	0.00287	0.03067	0.96644		6.49677	2.13677e-05	3.48162e-07	1.95636e-06	8.89109e-08	8.27337e-05	0.000975812	0.000251759	0.00486	0.9938
		6.50917	1.6793e-05	0.00275	0.04645	0.95078		6.50917	0.00105	2.41639e-05	6.92954e-06	1.08007e-05	0.00073514	0.00867	0.00224	0.04327	0.94399							6.50917	1.65347e-05	0.00287	0.03064	0.96647		6.50917	2.11498e-05	3.45052e-07	1.9391e-06	8.82316e-08	8.23859e-05	0.000971767	0.000251011	0.00485	0.99382
		6.52157	1.67248e-05	0.00274	0.04641	0.95083		6.52157	0.00104	2.39408e-05	6.86662e-06	1.07147e-05	0.000731859	0.00863	0.00223	0.04315	0.94417							6.52157	1.64691e-05	0.00286	0.03062	0.9665		6.52157	2.09343e-05	3.41964e-07	1.92207e-06	8.75619e-08	8.20427e-05	0.000967778	0.000250283	0.00484	0.99384
		6.53397	1.66565e-05	0.00274	0.04636	0.95088		6.53397	0.00103	2.37226e-05	6.80465e-06	1.06298e-05	0.000728612	0.0086	0.00222	0.04303	0.94435							6.53397	1.64043e-05	0.00286	0.0306	0.96653		6.53397	2.07237e-05	3.38931e-07	1.90523e-06	8.68986e-08	8.17022e-05	0.000963811	0.000249551	0.00483	0.99385
		6.54637	1.65889e-05	0.00274	0.04632	0.95093		6.54637	0.00102	2.35058e-05	6.74341e-06	1.05459e-05	0.000725413	0.00856	0.00222	0.04291	0.94453							6.54637	1.63397e-05	0.00286	0.03057	0.96656		6.54637	2.05133e-05	3.35935e-07	1.88871e-06	8.62443e-08	8.13658e-05	0.000959872	0.000248832	0.00482	0.99387
		6.55876	1.65222e-05	0.00273	0.04627	0.95098		6.55876	0.00101	2.32921e-05	6.68299e-06	1.04631e-05	0.000722219	0.00852	0.00221	0.0428	0.9447							6.55876	1.62761e-05	0.00285	0.03055	0.96658		6.55876	2.03075e-05	3.32977e-07	1.87243e-06	8.55961e-08	8.103e-05	0.000955985	0.000248108	0.00481	0.99389
		6.57116	1.64561e-05	0.00273	0.04623	0.95103		6.57116	0.000998298	2.30809e-05	6.62344e-06	1.03813e-05	0.000719054	0.00848	0.0022	0.04268	0.94487							6.57116	1.62127e-05	0.00285	0.03052	0.96661		6.57116	2.01052e-05	3.30055e-07	1.85626e-06	8.49569e-08	8.06984e-05	0.000952106	0.000247391	0.00479	0.9939
		6.58356	1.63896e-05	0.00272	0.04618	0.95108		6.58356	0.000988082	2.2872e-05	6.56462e-06	1.03004e-05	0.000715914	0.00845	0.0022	0.04257	0.94504							6.58356	1.61497e-05	0.00285	0.0305	0.96664		6.58356	1.99055e-05	3.27186e-07	1.84031e-06	8.43245e-08	8.03693e-05	0.000948277	0.000246698	0.00478	0.99392
		6.59596	1.63243e-05	0.00272	0.04614	0.95113		6.59596	0.000977995	2.26659e-05	6.5065e-06	1.02204e-05	0.00071281	0.00841	0.00219	0.04246	0.94521							6.59596	1.60871e-05	0.00284	0.03048	0.96667		6.59596	1.97086e-05	3.24333e-07	1.82444e-06	8.3699e-08	8.00435e-05	0.000944475	0.000245989	0.00477	0.99394
		6.60836	1.62591e-05	0.00272	0.04609	0.95118		6.60836	0.000968052	2.24639e-05	6.44925e-06	1.01415e-05	0.000709727	0.00837	0.00218	0.04234	0.94538							6.60836	1.60252e-05	0.00284	0.03045	0.96669		6.60836	1.95142e-05	3.21529e-07	1.8089e-06	8.30815e-08	7.97197e-05	0.000940709	0.000245295	0.00476	0.99395
		6.62076	1.61948e-05	0.00271	0.04605	0.95122		6.62076	0.000958271	2.22637e-05	6.39262e-06	1.00636e-05	0.000706676	0.00834	0.00218	0.04223	0.94555							6.62076	1.59641e-05	0.00284	0.03043	0.96672		6.62076	1.93221e-05	3.18752e-07	1.79354e-06	8.24712e-08	7.93978e-05	0.000936963	0.000244592	0.00475	0.99397
		6.63315	1.61311e-05	0.00271	0.046	0.95127		6.63315	0.000948608	2.20663e-05	6.33674e-06	9.98641e-06	0.000703641	0.0083	0.00217	0.04212	0.94572							6.63315	1.59028e-05	0.00283	0.0304	0.96675		6.63315	1.91333e-05	3.16019e-07	1.77844e-06	8.18679e-08	7.90805e-05	0.00093326	0.000243908	0.00474	0.99399
		6.64555	1.60674e-05	0.00271	0.04596	0.95132		6.64555	0.000939085	2.18706e-05	6.28157e-06	9.91023e-06	0.000700636	0.00827	0.00216	0.04201	0.94588							6.64555	1.58426e-05	0.00283	0.03038	0.96677		6.64555	1.89467e-05	3.13309e-07	1.76349e-06	8.12725e-08	7.87653e-05	0.000929587	0.000243232	0.00473	0.994
		6.65795	1.60049e-05	0.0027	0.04592	0.95136		6.65795	0.000929701	2.16781e-05	6.22718e-06	9.83493e-06	0.000697653	0.00823	0.00216	0.0419	0.94605							6.65795	1.57825e-05	0.00283	0.03036	0.9668		6.65795	1.87624e-05	3.10642e-07	1.7487e-06	8.06823e-08	7.84521e-05	0.000925933	0.000242546	0.00472	0.99402
		6.67035	1.59423e-05	0.0027	0.04587	0.95141		6.67035	0.000920443	2.14884e-05	6.1735e-06	9.76049e-06	0.000694701	0.0082	0.00215	0.04179	0.94621							6.67035	1.57228e-05	0.00282	0.03034	0.96683		6.67035	1.85809e-05	3.08003e-07	1.73412e-06	8.00993e-08	7.8142e-05	0.000922322	0.00024188	0.0047	0.99403
		6.68275	1.58802e-05	0.0027	0.04583	0.95146		6.68275	0.000911353	2.13012e-05	6.12063e-06	9.68713e-06	0.000691805	0.00817	0.00214	0.04168	0.94637							6.68275	1.56638e-05	0.00282	0.03031	0.96685		6.68275	1.84025e-05	3.05402e-07	1.71968e-06	7.95232e-08	7.78348e-05	0.000918734	0.000241207	0.00469	0.99405
		6.69515	1.58187e-05	0.00269	0.04579	0.9515		6.69515	0.000902284	2.11151e-05	6.06801e-06	9.61426e-06	0.000688876	0.00813	0.00214	0.04158	0.94653							6.69515	1.56053e-05	0.00282	0.03029	0.96688		6.69515	1.82255e-05	3.02846e-07	1.7055e-06	7.89551e-08	7.75307e-05	0.000915192	0.000240552	0.00468	0.99406
		6.70754	1.57576e-05	0.00269	0.04574	0.95155		6.70754	0.000893488	2.09323e-05	6.01634e-06	9.54263e-06	0.000685995	0.0081	0.00213	0.04147	0.94669							6.70754	1.55469e-05	0.00281	0.03027	0.96691		6.70754	1.80503e-05	3.00291e-07	1.69125e-06	7.83866e-08	7.72234e-05	0.000911612	0.000239876	0.00467	0.99408
		6.71994	1.56974e-05	0.00269	0.0457	0.9516		6.71994	0.000884701	2.07524e-05	5.96537e-06	9.47168e-06	0.000683163	0.00806	0.00212	0.04136	0.94684							6.71994	1.54893e-05	0.00281	0.03024	0.96693		6.71994	1.7879e-05	2.97789e-07	1.67739e-06	7.78305e-08	7.69237e-05	0.000908166	0.000239227	0.00466	0.99409
		6.73234	1.56374e-05	0.00268	0.04566	0.95164		6.73234	0.000876063	2.05735e-05	5.91482e-06	9.40101e-06	0.000680313	0.00803	0.00212	0.04126	0.947							6.73234	1.54319e-05	0.00281	0.03022	0.96696		6.73234	1.77112e-05	2.9533e-07	1.66381e-06	7.72859e-08	7.66316e-05	0.000904701	0.000238593	0.00465	0.99411
		6.74474	1.55778e-05	0.00268	0.04562	0.95169		6.74474	0.00086753	2.0398e-05	5.86506e-06	9.3317e-06	0.000677514	0.008	0.00211	0.04115	0.94716							6.74474	1.53748e-05	0.0028	0.0302	0.96698		6.74474	1.75431e-05	2.92874e-07	1.65022e-06	7.67376e-08	7.63337e-05	0.000901237	0.000237942	0.00464	0.99412
		6.75714	1.55189e-05	0.00268	0.04557	0.95173		6.75714	0.00085915	2.02234e-05	5.81576e-06	9.26331e-06	0.000674717	0.00797	0.0021	0.04105	0.94731							6.75714	1.53185e-05	0.0028	0.03018	0.96701		6.75714	1.73787e-05	2.90465e-07	1.63683e-06	7.62002e-08	7.60417e-05	0.000897865	0.000237307	0.00463	0.99414
		6.76954	1.54602e-05	0.00267	0.04553	0.95178		6.76954	0.000850882	2.0052e-05	5.76726e-06	9.19541e-06	0.000671972	0.00793	0.0021	0.04095	0.94746							6.76954	1.52623e-05	0.0028	0.03015	0.96703		6.76954	1.72158e-05	2.88083e-07	1.62359e-06	7.56652e-08	7.57473e-05	0.000894456	0.000236667	0.00462	0.99415
		6.78194	1.54019e-05	0.00267	0.04549	0.95182		6.78194	0.00084271	1.98828e-05	5.71937e-06	9.1284e-06	0.000669223	0.0079	0.00209	0.04084	0.94761							6.78194	1.52067e-05	0.00279	0.03013	0.96706		6.78194	1.70552e-05	2.85723e-07	1.61051e-06	7.51378e-08	7.54583e-05	0.000891042	0.000236032	0.00461	0.99417
		6.79433	1.53439e-05	0.00267	0.04545	0.95187		6.79433	0.000834675	1.97154e-05	5.67201e-06	9.06255e-06	0.000666547	0.00787	0.00209	0.04074	0.94776							6.79433	1.51518e-05	0.00279	0.03011	0.96708		6.79433	1.68965e-05	2.83391e-07	1.59761e-06	7.46149e-08	7.51727e-05	0.000887718	0.000235403	0.0046	0.99418
		6.80673	1.52865e-05	0.00266	0.04541	0.95191		6.80673	0.000826703	1.95497e-05	5.62507e-06	8.99642e-06	0.000663793	0.00784	0.00208	0.04064	0.94792							6.80673	1.50969e-05	0.00279	0.03009	0.96711		6.80673	1.67409e-05	2.81108e-07	1.58492e-06	7.41051e-08	7.48915e-05	0.00088449	0.000234794	0.00459	0.9942
		6.81913	1.52296e-05	0.00266	0.04537	0.95196		6.81913	0.000818884	1.93864e-05	5.57889e-06	8.93205e-06	0.000661154	0.00781	0.00207	0.04054	0.94806							6.81913	1.50425e-05	0.00279	0.03007	0.96713		6.81913	1.6586e-05	2.78823e-07	1.57229e-06	7.35912e-08	7.46095e-05	0.000881144	0.00023416	0.00458	0.99421
		6.83153	1.51731e-05	0.00266	0.04533	0.952		6.83153	0.000811151	1.92257e-05	5.53323e-06	8.86807e-06	0.000658501	0.00778	0.00207	0.04044	0.94821							6.83153	1.49884e-05	0.00278	0.03005	0.96716		6.83153	1.6435e-05	2.76594e-07	1.5599e-06	7.30912e-08	7.43371e-05	0.000877937	0.000233561	0.00457	0.99423
		6.84393	1.51171e-05	0.00265	0.04529	0.95204		6.84393	0.000803503	1.90659e-05	5.48806e-06	8.80434e-06	0.000655885	0.00775	0.00206	0.04034	0.94836							6.84393	1.49348e-05	0.00278	0.03002	0.96718		6.84393	1.62846e-05	2.7438e-07	1.54761e-06	7.25951e-08	7.40579e-05	0.000874724	0.000232952	0.00456	0.99424
		6.85633	1.50616e-05	0.00265	0.04525	0.95209		6.85633	0.000795928	1.89084e-05	5.44327e-06	8.74171e-06	0.000653281	0.00772	0.00206	0.04024	0.9485							6.85633	1.48815e-05	0.00278	0.03	0.96721		6.85633	1.61365e-05	2.72192e-07	1.53546e-06	7.21051e-08	7.37848e-05	0.000871525	0.000232349	0.00455	0.99426
		6.86872	1.50063e-05	0.00265	0.04521	0.95213		6.86872	0.000788513	1.87533e-05	5.39974e-06	8.67995e-06	0.000650716	0.00769	0.00205	0.04015	0.94865							6.86872	1.4829e-05	0.00277	0.02998	0.96723		6.86872	1.59897e-05	2.70029e-07	1.52346e-06	7.16156e-08	7.35111e-05	0.000868316	0.000231746	0.00454	0.99427
		6.88112	1.49516e-05	0.00264	0.04517	0.95217		6.88112	0.00078117	1.85994e-05	5.35589e-06	8.61854e-06	0.00064811	0.00766	0.00204	0.04005	0.94879							6.88112	1.47764e-05	0.00277	0.02996	0.96726		6.88112	1.58452e-05	2.6788e-07	1.51155e-06	7.1132e-08	7.32359e-05	0.000865129	0.000231138	0.00453	0.99428
		6.89352	1.4897e-05	0.00264	0.04513	0.95222		6.89352	0.000773969	1.84482e-05	5.31285e-06	8.55817e-06	0.000645607	0.00763	0.00204	0.03995	0.94893							6.89352	1.47244e-05	0.00277	0.02994	0.96728		6.89352	1.57024e-05	2.65772e-07	1.49982e-06	7.06515e-08	7.29704e-05	0.000862025	0.000230548	0.00452	0.9943
		6.90592	1.48431e-05	0.00264	0.04509	0.95226		6.90592	0.000766763	1.82975e-05	5.27027e-06	8.49802e-06	0.000643061	0.0076	0.00203	0.03986	0.94907							6.90592	1.46728e-05	0.00276	0.02992	0.9673		6.90592	1.55624e-05	2.63693e-07	1.48828e-06	7.01832e-08	7.2708e-05	0.000858931	0.000229965	0.00451	0.99431
		6.91832	1.47893e-05	0.00263	0.04505	0.9523		6.91832	0.000759735	1.81499e-05	5.22851e-06	8.43868e-06	0.000640552	0.00757	0.00203	0.03976	0.94921							6.91832	1.46215e-05	0.00276	0.0299	0.96733		6.91832	1.5423e-05	2.61623e-07	1.4768e-06	6.97148e-08	7.24404e-05	0.000855839	0.000229374	0.0045	0.99433
		6.93072	1.47361e-05	0.00263	0.04501	0.95235		6.93072	0.000752787	1.80038e-05	5.18692e-06	8.38024e-06	0.000638068	0.00754	0.00202	0.03967	0.94935							6.93072	1.45705e-05	0.00276	0.02987	0.96735		6.93072	1.52856e-05	2.59583e-07	1.46542e-06	6.925e-08	7.21791e-05	0.000852769	0.000228791	0.00449	0.99434
		6.94311	1.46833e-05	0.00263	0.04497	0.95239		6.94311	0.000745916	1.78592e-05	5.14619e-06	8.3222e-06	0.00063563	0.00751	0.00202	0.03957	0.94949							6.94311	1.45199e-05	0.00276	0.02985	0.96738		6.94311	1.51503e-05	2.57569e-07	1.45426e-06	6.8796e-08	7.19177e-05	0.000849742	0.000228216	0.00448	0.99435
		6.95551	1.46308e-05	0.00262	0.04493	0.95243		6.95551	0.000739136	1.77162e-05	5.10554e-06	8.26494e-06	0.000633175	0.00748	0.00201	0.03948	0.94963							6.95551	1.44697e-05	0.00275	0.02983	0.9674		6.95551	1.50173e-05	2.55585e-07	1.44326e-06	6.83447e-08	7.16635e-05	0.000846778	0.000227649	0.00447	0.99437
		6.96791	1.45787e-05	0.00262	0.04489	0.95247		6.96791	0.000732448	1.7575e-05	5.06565e-06	8.20807e-06	0.000630731	0.00745	0.002	0.03939	0.94976							6.96791	1.44199e-05	0.00275	0.02981	0.96742		6.96791	1.48847e-05	2.5361e-07	1.43226e-06	6.78955e-08	7.1403e-05	0.000843762	0.000227074	0.00446	0.99438
		6.98031	1.45271e-05	0.00262	0.04485	0.95251		6.98031	0.000725836	1.74357e-05	5.02586e-06	8.15199e-06	0.000628342	0.00743	0.002	0.03929	0.9499							6.98031	1.43705e-05	0.00275	0.02979	0.96745		6.98031	1.47549e-05	2.51673e-07	1.4215e-06	6.74529e-08	7.11512e-05	0.000840815	0.000226512	0.00445	0.99439
		6.99271	1.44757e-05	0.00262	0.04482	0.95255		6.99271	0.000719312	1.72978e-05	4.98694e-06	8.09639e-06	0.000625945	0.0074	0.00199	0.0392	0.95003							6.99271	1.43212e-05	0.00274	0.02977	0.96747		6.99271	1.46259e-05	2.49744e-07	1.41077e-06	6.70137e-08	7.08998e-05	0.00083787	0.000225944	0.00444	0.99441
		7.00511	1.44247e-05	0.00261	0.04478	0.95259		7.00511	0.00071288	1.71618e-05	4.94837e-06	8.04157e-06	0.000623571	0.00737	0.00199	0.03911	0.95017							7.00511	1.42719e-05	0.00274	0.02975	0.96749		7.00511	1.4499e-05	2.47846e-07	1.40023e-06	6.65799e-08	7.065e-05	0.000834943	0.000225387	0.00443	0.99442
		7.01751	1.43748e-05	0.00261	0.04474	0.95264		7.01751	0.000706532	1.70272e-05	4.91019e-06	7.98731e-06	0.000621233	0.00734	0.00198	0.03902	0.9503							7.01751	1.42239e-05	0.00274	0.02973	0.96752		7.01751	1.43735e-05	2.45969e-07	1.38979e-06	6.61529e-08	7.03995e-05	0.00083206	0.000224836	0.00442	0.99443
		7.0299	1.43246e-05	0.00261	0.0447	0.95268		7.0299	0.000700233	1.6894e-05	4.87241e-06	7.93346e-06	0.000618887	0.00731	0.00198	0.03893	0.95043							7.0299	1.41762e-05	0.00274	0.02971	0.96754		7.0299	1.425e-05	2.44116e-07	1.37948e-06	6.57302e-08	7.01572e-05	0.000829183	0.000224289	0.00442	0.99444
		7.0423	1.42739e-05	0.0026	0.04466	0.95272		7.0423	0.000694048	1.67626e-05	4.83492e-06	7.88005e-06	0.000616565	0.00729	0.00197	0.03884	0.95056							7.0423	1.41284e-05	0.00273	0.02969	0.96756		7.0423	1.41273e-05	2.42277e-07	1.36927e-06	6.5309e-08	6.99098e-05	0.000826316	0.000223738	0.00441	0.99446
		7.0547	1.42242e-05	0.0026	0.04463	0.95276		7.0547	0.000687934	1.66327e-05	4.7981e-06	7.82764e-06	0.000614292	0.00726	0.00197	0.03875	0.95069							7.0547	1.40806e-05	0.00273	0.02967	0.96759		7.0547	1.40065e-05	2.40461e-07	1.35917e-06	6.48921e-08	6.96682e-05	0.000823504	0.000223195	0.0044	0.99447
		7.0671	1.41758e-05	0.0026	0.04459	0.9528		7.0671	0.000681882	1.65042e-05	4.76175e-06	7.77547e-06	0.000612002	0.00723	0.00196	0.03866	0.95082							7.0671	1.40335e-05	0.00273	0.02965	0.96761		7.0671	1.3887e-05	2.38667e-07	1.34919e-06	6.44787e-08	6.94275e-05	0.000820691	0.000222653	0.00439	0.99448
		7.0795	1.41268e-05	0.0026	0.04455	0.95284		7.0795	0.000675917	1.63773e-05	4.72562e-06	7.72398e-06	0.000609758	0.00721	0.00196	0.03858	0.95094							7.0795	1.39873e-05	0.00272	0.02963	0.96763		7.0795	1.37695e-05	2.36896e-07	1.33935e-06	6.40746e-08	6.91901e-05	0.000817901	0.00022212	0.00438	0.9945
		7.0919	1.40778e-05	0.00259	0.04452	0.95288		7.0919	0.000670024	1.62518e-05	4.69013e-06	7.67294e-06	0.000607516	0.00718	0.00195	0.03849	0.95107							7.0919	1.39403e-05	0.00272	0.02961	0.96765		7.0919	1.36528e-05	2.35134e-07	1.32958e-06	6.36685e-08	6.89512e-05	0.000815118	0.000221584	0.00437	0.99451
		7.10429	1.40298e-05	0.00259	0.04448	0.95292		7.10429	0.00066422	1.61279e-05	4.65485e-06	7.62264e-06	0.000605285	0.00716	0.00195	0.0384	0.9512							7.10429	1.3895e-05	0.00272	0.02959	0.96768		7.10429	1.35377e-05	2.33415e-07	1.31992e-06	6.32702e-08	6.87151e-05	0.000812382	0.000221055	0.00436	0.99452
		7.11669	1.39827e-05	0.00259	0.04444	0.95296		7.11669	0.000658472	1.60051e-05	4.61998e-06	7.57266e-06	0.000603069	0.00713	0.00194	0.03832	0.95132							7.11669	1.38487e-05	0.00272	0.02957	0.9677		7.11669	1.34243e-05	2.31698e-07	1.3104e-06	6.28766e-08	6.84824e-05	0.00080967	0.000220529	0.00435	0.99453
		7.12909	1.39351e-05	0.00258	0.04441	0.953		7.12909	0.000652801	1.58837e-05	4.58554e-06	7.52313e-06	0.000600877	0.0071	0.00194	0.03823	0.95145							7.12909	1.38034e-05	0.00271	0.02955	0.96772		7.12909	1.33122e-05	2.29994e-07	1.30097e-06	6.24841e-08	6.82503e-05	0.000806967	0.000220015	0.00435	0.99454
		7.14149	1.38882e-05	0.00258	0.04437	0.95303		7.14149	0.000647188	1.5764e-05	4.55157e-06	7.47435e-06	0.000598701	0.00708	0.00193	0.03815	0.95157							7.14149	1.37581e-05	0.00271	0.02953	0.96774		7.14149	1.32012e-05	2.28311e-07	1.29162e-06	6.20972e-08	6.80204e-05	0.000804261	0.00021948	0.00434	0.99456
		7.15389	1.38414e-05	0.00258	0.04434	0.95307		7.15389	0.00064165	1.56453e-05	4.5178e-06	7.42583e-06	0.00059655	0.00705	0.00193	0.03806	0.95169							7.15389	1.37135e-05	0.00271	0.02951	0.96777		7.15389	1.30916e-05	2.26666e-07	1.28239e-06	6.17131e-08	6.7791e-05	0.000801592	0.000218977	0.00433	0.99457
		7.16629	1.37952e-05	0.00258	0.0443	0.95311		7.16629	0.000636199	1.55284e-05	4.48453e-06	7.37801e-06	0.00059441	0.00703	0.00192	0.03798	0.95181							7.16629	1.36685e-05	0.0027	0.02949	0.96779		7.16629	1.29834e-05	2.25026e-07	1.27326e-06	6.13342e-08	6.75654e-05	0.000798946	0.000218453	0.00432	0.99458
		7.17868	1.37486e-05	0.00257	0.04426	0.95315		7.17868	0.000630791	1.54125e-05	4.45161e-06	7.33064e-06	0.000592281	0.007	0.00192	0.03789	0.95194							7.17868	1.36251e-05	0.0027	0.02948	0.96781		7.17868	1.28767e-05	2.23405e-07	1.26424e-06	6.09603e-08	6.73408e-05	0.000796326	0.000217953	0.00431	0.99459
		7.19108	1.37024e-05	0.00257	0.04423	0.95319		7.19108	0.000625452	1.52984e-05	4.419e-06	7.28374e-06	0.000590163	0.00698	0.00191	0.03781	0.95206							7.19108	1.35808e-05	0.0027	0.02946	0.96783		7.19108	1.27708e-05	2.21787e-07	1.25531e-06	6.05865e-08	6.71165e-05	0.000793713	0.00021744	0.0043	0.9946
		7.20348	1.36565e-05	0.00257	0.04419	0.95323		7.20348	0.000620187	1.51842e-05	4.38694e-06	7.23731e-06	0.000588069	0.00695	0.00191	0.03773	0.95217							7.20348	1.35369e-05	0.0027	0.02944	0.96785		7.20348	1.26666e-05	2.20207e-07	1.24647e-06	6.022e-08	6.68955e-05	0.000791137	0.000216944	0.00429	0.99462
		7.21588	1.36122e-05	0.00256	0.04416	0.95326		7.21588	0.000614974	1.50727e-05	4.355e-06	7.19131e-06	0.000585996	0.00693	0.0019	0.03765	0.95229							7.21588	1.34937e-05	0.00269	0.02942	0.96787		7.21588	1.25634e-05	2.18645e-07	1.23773e-06	5.98538e-08	6.66744e-05	0.000788552	0.000216444	0.00429	0.99463
		7.22828	1.35673e-05	0.00256	0.04412	0.9533		7.22828	0.000609845	1.49624e-05	4.32353e-06	7.14588e-06	0.000583929	0.00691	0.0019	0.03757	0.95241							7.22828	1.345e-05	0.00269	0.0294	0.9679		7.22828	1.24615e-05	2.17085e-07	1.2291e-06	5.94936e-08	6.64553e-05	0.000786008	0.00021595	0.00428	0.99464
		7.24068	1.3523e-05	0.00256	0.04409	0.95334		7.24068	0.000604761	1.48521e-05	4.29237e-06	7.10078e-06	0.000581874	0.00688	0.00189	0.03748	0.95253							7.24068	1.3408e-05	0.00269	0.02938	0.96792		7.24068	1.23608e-05	2.15547e-07	1.22055e-06	5.91363e-08	6.62399e-05	0.000783469	0.000215449	0.00427	0.99465
		7.25308	1.34781e-05	0.00256	0.04405	0.95338		7.25308	0.000599741	1.47443e-05	4.26158e-06	7.05614e-06	0.000579853	0.00686	0.00189	0.0374	0.95264							7.25308	1.33647e-05	0.00269	0.02936	0.96794		7.25308	1.22613e-05	2.14032e-07	1.21208e-06	5.87826e-08	6.60235e-05	0.000780952	0.000214954	0.00426	0.99466
		7.26547	1.34345e-05	0.00255	0.04402	0.95342		7.26547	0.000594783	1.4637e-05	4.23109e-06	7.0121e-06	0.00057783	0.00684	0.00188	0.03732	0.95276							7.26547	1.33229e-05	0.00268	0.02934	0.96796		7.26547	1.21628e-05	2.12536e-07	1.20371e-06	5.84313e-08	6.58097e-05	0.000778448	0.000214471	0.00425	0.99467
		7.27787	1.33905e-05	0.00255	0.04398	0.95345		7.27787	0.000589884	1.45308e-05	4.20092e-06	6.96831e-06	0.000575831	0.00681	0.00188	0.03725	0.95287							7.27787	1.32808e-05	0.00268	0.02932	0.96798		7.27787	1.20657e-05	2.1105e-07	1.19543e-06	5.80853e-08	6.55978e-05	0.000775969	0.000213987	0.00425	0.99469
		7.29027	1.3347e-05	0.00255	0.04395	0.95349		7.29027	0.000585038	1.44263e-05	4.17118e-06	6.92509e-06	0.000573841	0.00679	0.00187	0.03717	0.95299							7.29027	1.32402e-05	0.00268	0.02931	0.968		7.29027	1.19702e-05	2.09578e-07	1.18724e-06	5.77413e-08	6.53861e-05	0.000773516	0.000213513	0.00424	0.9947
		7.30267	1.33039e-05	0.00254	0.04391	0.95353		7.30267	0.000580246	1.43228e-05	4.14168e-06	6.88225e-06	0.000571863	0.00677	0.00187	0.03709	0.9531							7.30267	1.31984e-05	0.00268	0.02929	0.96802		7.30267	1.18746e-05	2.08125e-07	1.1791e-06	5.74008e-08	6.51776e-05	0.000771064	0.000213027	0.00423	0.99471
		7.31507	1.32613e-05	0.00254	0.04388	0.95356		7.31507	0.000575518	1.42199e-05	4.11247e-06	6.83981e-06	0.000569899	0.00674	0.00186	0.03701	0.95321							7.31507	1.3157e-05	0.00267	0.02927	0.96804		7.31507	1.17806e-05	2.0668e-07	1.17112e-06	5.70636e-08	6.49686e-05	0.000768629	0.000212551	0.00422	0.99472
		7.32747	1.32192e-05	0.00254	0.04385	0.9536		7.32747	0.000570855	1.41181e-05	4.08363e-06	6.79782e-06	0.000567961	0.00672	0.00186	0.03693	0.95333							7.32747	1.31165e-05	0.00267	0.02925	0.96806		7.32747	1.16879e-05	2.05262e-07	1.16318e-06	5.67304e-08	6.47626e-05	0.000766229	0.000212087	0.00421	0.99473
		7.33986	1.31766e-05	0.00254	0.04381	0.95364		7.33986	0.000566237	1.40179e-05	4.05508e-06	6.75631e-06	0.000566033	0.0067	0.00185	0.03686	0.95344							7.33986	1.30757e-05	0.00267	0.02923	0.96808		7.33986	1.15959e-05	2.0385e-07	1.15531e-06	5.63994e-08	6.45578e-05	0.000763839	0.000211612	0.00421	0.99474
		7.35226	1.31346e-05	0.00253	0.04378	0.95367		7.35226	0.000561681	1.39194e-05	4.02694e-06	6.71524e-06	0.00056412	0.00667	0.00185	0.03678	0.95355							7.35226	1.30353e-05	0.00267	0.02922	0.9681		7.35226	1.15054e-05	2.02458e-07	1.14758e-06	5.60724e-08	6.43549e-05	0.000761461	0.000211146	0.0042	0.99475
		7.36466	1.30929e-05	0.00253	0.04375	0.95371		7.36466	0.000557162	1.38211e-05	3.99888e-06	6.67436e-06	0.000562208	0.00665	0.00185	0.0367	0.95366							7.36466	1.2995e-05	0.00266	0.0292	0.96813		7.36466	1.14155e-05	2.0107e-07	1.13981e-06	5.57461e-08	6.41507e-05	0.000759082	0.000210679	0.00419	0.99476
		7.37706	1.30511e-05	0.00253	0.04371	0.95375		7.37706	0.000552675	1.37229e-05	3.97107e-06	6.6337e-06	0.000560291	0.00663	0.00184	0.03663	0.95377							7.37706	1.29559e-05	0.00266	0.02918	0.96815		7.37706	1.13279e-05	1.9972e-07	1.13226e-06	5.54272e-08	6.39526e-05	0.000756763	0.000210223	0.00418	0.99477
		7.38946	1.30111e-05	0.00253	0.04368	0.95378		7.38946	0.000548292	1.36272e-05	3.94385e-06	6.59397e-06	0.000558442	0.00661	0.00184	0.03655	0.95387							7.38946	1.29166e-05	0.00266	0.02916	0.96817		7.38946	1.124e-05	1.98366e-07	1.12476e-06	5.51094e-08	6.37533e-05	0.000754431	0.000209768	0.00418	0.99478
		7.40186	1.29696e-05	0.00252	0.04365	0.95382		7.40186	0.000543917	1.35317e-05	3.91668e-06	6.55424e-06	0.000556561	0.00659	0.00183	0.03648	0.95398							7.40186	1.28773e-05	0.00266	0.02915	0.96819		7.40186	1.11538e-05	1.97032e-07	1.11732e-06	5.47947e-08	6.35562e-05	0.000752129	0.000209317	0.00417	0.99479
		7.41425	1.29292e-05	0.00252	0.04362	0.95385		7.41425	0.000539632	1.34378e-05	3.88995e-06	6.5152e-06	0.000554719	0.00656	0.00183	0.0364	0.95409							7.41425	1.28378e-05	0.00265	0.02913	0.96821		7.41425	1.10679e-05	1.95705e-07	1.1099e-06	5.44823e-08	6.33595e-05	0.00074983	0.000208862	0.00416	0.99481
		7.42665	1.28892e-05	0.00252	0.04358	0.95389		7.42665	0.000535373	1.33453e-05	3.86348e-06	6.47633e-06	0.000552885	0.00654	0.00182	0.03633	0.95419							7.42665	1.2799e-05	0.00265	0.02911	0.96823		7.42665	1.09833e-05	1.94391e-07	1.10258e-06	5.41716e-08	6.31629e-05	0.00074751	0.000208405	0.00415	0.99482
		7.43905	1.2849e-05	0.00252	0.04355	0.95392		7.43905	0.000531181	1.32531e-05	3.83733e-06	6.43784e-06	0.000551076	0.00652	0.00182	0.03626	0.9543							7.43905	1.27614e-05	0.00265	0.02909	0.96825		7.43905	1.08996e-05	1.93103e-07	1.0954e-06	5.38658e-08	6.29694e-05	0.000745297	0.000207963	0.00415	0.99483
		7.45145	1.28089e-05	0.00251	0.04352	0.95396		7.45145	0.00052702	1.31623e-05	3.81137e-06	6.3998e-06	0.000549262	0.0065	0.00181	0.03618	0.9544							7.45145	1.27231e-05	0.00265	0.02908	0.96827		7.45145	1.08161e-05	1.91808e-07	1.08814e-06	5.35597e-08	6.27744e-05	0.000742967	0.000207507	0.00414	0.99484
		7.46385	1.27697e-05	0.00251	0.04349	0.95399		7.46385	0.000522878	1.30714e-05	3.78551e-06	6.36163e-06	0.00054744	0.00648	0.00181	0.03611	0.95451							7.46385	1.26849e-05	0.00264	0.02906	0.96829		7.46385	1.07346e-05	1.90547e-07	1.08111e-06	5.3261e-08	6.25849e-05	0.000740793	0.000207075	0.00413	0.99485
		7.47625	1.27305e-05	0.00251	0.04345	0.95403		7.47625	0.00051883	1.29824e-05	3.76019e-06	6.32501e-06	0.000545666	0.00646	0.00181	0.03604	0.95461							7.47625	1.26472e-05	0.00264	0.02904	0.9683		7.47625	1.06539e-05	1.89296e-07	1.07413e-06	5.29645e-08	6.2397e-05	0.000738608	0.000206639	0.00412	0.99486
		7.48865	1.26912e-05	0.00251	0.04342	0.95406		7.48865	0.000514802	1.28941e-05	3.73498e-06	6.28779e-06	0.000543875	0.00644	0.0018	0.03596	0.95471							7.48865	1.26095e-05	0.00264	0.02902	0.96832		7.48865	1.05736e-05	1.88044e-07	1.06715e-06	5.26667e-08	6.22051e-05	0.000736333	0.000206195	0.00412	0.99487
		7.50104	1.2653e-05	0.0025	0.04339	0.95409		7.50104	0.000510829	1.28067e-05	3.71004e-06	6.25124e-06	0.000542117	0.00642	0.0018	0.03589	0.95482							7.50104	1.25725e-05	0.00264	0.02901	0.96834		7.50104	1.04945e-05	1.86818e-07	1.06031e-06	5.23745e-08	6.20157e-05	0.000734149	0.000205758	0.00411	0.99488
		7.51344	1.26142e-05	0.0025	0.04336	0.95413		7.51344	0.000506887	1.27203e-05	3.68551e-06	6.21461e-06	0.000540377	0.0064	0.00179	0.03582	0.95492							7.51344	1.25356e-05	0.00263	0.02899	0.96836		7.51344	1.04163e-05	1.85604e-07	1.05352e-06	5.20873e-08	6.18344e-05	0.000732013	0.000205339	0.0041	0.99489
		7.52584	1.25759e-05	0.0025	0.04333	0.95416		7.52584	0.000503011	1.26348e-05	3.66108e-06	6.17891e-06	0.000538657	0.00638	0.00179	0.03575	0.95502							7.52584	1.24986e-05	0.00263	0.02897	0.96838		7.52584	1.03387e-05	1.84393e-07	1.04679e-06	5.17988e-08	6.16509e-05	0.000729864	0.000204906	0.00409	0.9949
		7.53824	1.25382e-05	0.0025	0.04329	0.9542		7.53824	0.000499174	1.25496e-05	3.63686e-06	6.14297e-06	0.000536936	0.00636	0.00179	0.03568	0.95512							7.53824	1.24624e-05	0.00263	0.02896	0.9684		7.53824	1.02623e-05	1.83204e-07	1.04014e-06	5.15149e-08	6.14645e-05	0.0007277	0.000204482	0.00409	0.99491
		7.55064	1.25005e-05	0.00249	0.04326	0.95423		7.55064	0.000495387	1.24658e-05	3.61301e-06	6.10786e-06	0.000535221	0.00634	0.00178	0.03561	0.95522							7.55064	1.24262e-05	0.00263	0.02894	0.96842		7.55064	1.0187e-05	1.82023e-07	1.03355e-06	5.12354e-08	6.12849e-05	0.000725608	0.000204058	0.00408	0.99492
		7.56304	1.24628e-05	0.00249	0.04323	0.95426		7.56304	0.000491617	1.23834e-05	3.58937e-06	6.07309e-06	0.000533513	0.00632	0.00178	0.03554	0.95532							7.56304	1.23897e-05	0.00263	0.02892	0.96844		7.56304	1.01114e-05	1.80849e-07	1.02698e-06	5.0953e-08	6.11016e-05	0.000723423	0.000203626	0.00407	0.99493
		7.57543	1.24256e-05	0.00249	0.0432	0.95429		7.57543	0.000487919	1.23011e-05	3.56592e-06	6.03827e-06	0.000531817	0.0063	0.00177	0.03547	0.95542							7.57543	1.23538e-05	0.00262	0.02891	0.96846		7.57543	1.00373e-05	1.79691e-07	1.0205e-06	5.06746e-08	6.09231e-05	0.000721338	0.000203212	0.00407	0.99494
		7.58783	1.23886e-05	0.00249	0.04317	0.95433		7.58783	0.000484224	1.22197e-05	3.54278e-06	6.00395e-06	0.000530137	0.00628	0.00177	0.0354	0.95551							7.58783	1.23181e-05	0.00262	0.02889	0.96848		7.58783	9.96444e-06	1.78549e-07	1.01409e-06	5.0401e-08	6.07444e-05	0.000719284	0.000202801	0.00406	0.99495
		7.60023	1.23517e-05	0.00248	0.04314	0.95436		7.60023	0.00048062	1.21395e-05	3.51984e-06	5.97012e-06	0.000528476	0.00626	0.00177	0.03534	0.95561							7.60023	1.2283e-05	0.00262	0.02887	0.9685		7.60023	9.89206e-06	1.77412e-07	1.00777e-06	5.01327e-08	6.05652e-05	0.000717208	0.000202387	0.00405	0.99496
		7.61263	1.23153e-05	0.00248	0.04311	0.9544		7.61263	0.000477006	1.20596e-05	3.49707e-06	5.93644e-06	0.000526834	0.00624	0.00176	0.03527	0.95571							7.61263	1.22477e-05	0.00262	0.02886	0.96852		7.61263	9.82005e-06	1.76288e-07	1.00147e-06	4.98601e-08	6.0392e-05	0.000715131	0.000201972	0.00404	0.99497
		7.62503	1.22787e-05	0.00248	0.04308	0.95443		7.62503	0.000473452	1.19806e-05	3.47443e-06	5.90282e-06	0.000525165	0.00622	0.00176	0.0352	0.95581							7.62503	1.22126e-05	0.00261	0.02884	0.96853		7.62503	9.74907e-06	1.75174e-07	9.95249e-07	4.95946e-08	6.02147e-05	0.000713073	0.00020156	0.00404	0.99498
		7.63743	1.22429e-05	0.00248	0.04305	0.95446		7.63743	0.00046993	1.19028e-05	3.45234e-06	5.87004e-06	0.000523542	0.0062	0.00175	0.03513	0.9559							7.63743	1.21782e-05	0.00261	0.02882	0.96855		7.63743	9.67894e-06	1.74075e-07	9.89094e-07	4.93309e-08	6.00398e-05	0.000711052	0.000201158	0.00403	0.99499
		7.64982	1.22071e-05	0.00247	0.04302	0.9545		7.64982	0.000466453	1.18254e-05	3.43029e-06	5.83706e-06	0.00052193	0.00618	0.00175	0.03507	0.95599							7.64982	1.21435e-05	0.00261	0.02881	0.96857		7.64982	9.60988e-06	1.72984e-07	9.83022e-07	4.90664e-08	5.98706e-05	0.000709057	0.000200755	0.00402	0.99499
		7.66222	1.21717e-05	0.00247	0.04299	0.95453		7.66222	0.000463035	1.17489e-05	3.40839e-06	5.80468e-06	0.000520307	0.00616	0.00175	0.035	0.95609							7.66222	1.21092e-05	0.00261	0.02879	0.96859		7.66222	9.5407e-06	1.719e-07	9.76946e-07	4.88057e-08	5.96961e-05	0.000707009	0.000200349	0.00402	0.995
		7.67462	1.21362e-05	0.00247	0.04296	0.95456		7.67462	0.000459608	1.1673e-05	3.38668e-06	5.77241e-06	0.00051872	0.00614	0.00174	0.03493	0.95618							7.67462	1.20751e-05	0.0026	0.02877	0.96861		7.67462	9.47304e-06	1.70833e-07	9.70992e-07	4.85496e-08	5.95276e-05	0.000705022	0.000199949	0.00401	0.99501
		7.68702	1.21006e-05	0.00247	0.04293	0.95459		7.68702	0.000456244	1.15982e-05	3.3655e-06	5.74065e-06	0.000517141	0.00613	0.00174	0.03487	0.95627							7.68702	1.2041e-05	0.0026	0.02876	0.96863		7.68702	9.40577e-06	1.6977e-07	9.65046e-07	4.82939e-08	5.93561e-05	0.000703031	0.000199549	0.004	0.99502
		7.69942	1.20659e-05	0.00246	0.0429	0.95462		7.69942	0.000452941	1.15238e-05	3.34435e-06	5.70901e-06	0.000515562	0.00611	0.00173	0.0348	0.95637							7.69942	1.20075e-05	0.0026	0.02874	0.96865		7.69942	9.33943e-06	1.68727e-07	9.59223e-07	4.80427e-08	5.9189e-05	0.000701104	0.00019916	0.004	0.99503
		7.71182	1.20311e-05	0.00246	0.04287	0.95465		7.71182	0.000449628	1.14503e-05	3.32312e-06	5.67757e-06	0.000513988	0.00609	0.00173	0.03474	0.95646							7.71182	1.19743e-05	0.0026	0.02873	0.96866		7.71182	9.27367e-06	1.67688e-07	9.53419e-07	4.77923e-08	5.9021e-05	0.000699152	0.000198768	0.00399	0.99504
		7.72422	1.19966e-05	0.00246	0.04284	0.95469		7.72422	0.000446384	1.13775e-05	3.30233e-06	5.64677e-06	0.000512435	0.00607	0.00173	0.03467	0.95655							7.72422	1.19408e-05	0.0026	0.02871	0.96868		7.72422	9.20816e-06	1.66658e-07	9.47658e-07	4.75437e-08	5.88554e-05	0.000697201	0.000198375	0.00398	0.99505
		7.73661	1.19621e-05	0.00246	0.04281	0.95472		7.73661	0.000443155	1.13054e-05	3.28175e-06	5.61576e-06	0.000510869	0.00605	0.00172	0.03461	0.95664							7.73661	1.19079e-05	0.00259	0.0287	0.9687		7.73661	9.14371e-06	1.65636e-07	9.41933e-07	4.72965e-08	5.86909e-05	0.000695269	0.000197986	0.00398	0.99506
		7.74901	1.19282e-05	0.00246	0.04278	0.95475		7.74901	0.000439969	1.12341e-05	3.26139e-06	5.5855e-06	0.000509334	0.00603	0.00172	0.03454	0.95673							7.74901	1.18748e-05	0.00259	0.02868	0.96872		7.74901	9.07999e-06	1.64628e-07	9.36294e-07	4.70516e-08	5.85249e-05	0.000693324	0.000197598	0.00397	0.99507
		7.76141	1.18943e-05	0.00245	0.04275	0.95478		7.76141	0.0004368	1.11634e-05	3.24129e-06	5.55518e-06	0.000507816	0.00602	0.00172	0.03448	0.95682							7.76141	1.18424e-05	0.00259	0.02866	0.96873		7.76141	9.01693e-06	1.63631e-07	9.30703e-07	4.68086e-08	5.83645e-05	0.000691433	0.000197216	0.00397	0.99508
		7.77381	1.18604e-05	0.00245	0.04272	0.95481		7.77381	0.000433685	1.10933e-05	3.22136e-06	5.52513e-06	0.0005063	0.006	0.00171	0.03442	0.95691							7.77381	1.18094e-05	0.00259	0.02865	0.96875		7.77381	8.95434e-06	1.62638e-07	9.25162e-07	4.65685e-08	5.82015e-05	0.000689532	0.000196831	0.00396	0.99509
		7.78621	1.18271e-05	0.00245	0.0427	0.95484		7.78621	0.0004306	1.10242e-05	3.2016e-06	5.49573e-06	0.0005048	0.00598	0.00171	0.03436	0.957							7.78621	1.17775e-05	0.00259	0.02863	0.96877		7.78621	8.89265e-06	1.61659e-07	9.19686e-07	4.63321e-08	5.80416e-05	0.000687675	0.000196455	0.00395	0.9951
		7.79861	1.17937e-05	0.00245	0.04267	0.95487		7.79861	0.000427531	1.09554e-05	3.18193e-06	5.46627e-06	0.00050329	0.00596	0.0017	0.03429	0.95709							7.79861	1.17453e-05	0.00258	0.02862	0.96879		7.79861	8.8314e-06	1.6069e-07	9.14252e-07	4.60967e-08	5.7881e-05	0.000685796	0.000196079	0.00395	0.9951
		7.811	1.17609e-05	0.00244	0.04264	0.95491		7.811	0.000424505	1.08873e-05	3.16243e-06	5.43705e-06	0.000501813	0.00595	0.0017	0.03423	0.95718							7.811	1.17136e-05	0.00258	0.0286	0.96881		7.811	8.77087e-06	1.59725e-07	9.08859e-07	4.58623e-08	5.77234e-05	0.000683947	0.0001957	0.00394	0.99511
		7.8234	1.17279e-05	0.00244	0.04261	0.95494		7.8234	0.000421526	1.08201e-05	3.14316e-06	5.40823e-06	0.000500326	0.00593	0.0017	0.03417	0.95726							7.8234	1.16818e-05	0.00258	0.02859	0.96882		7.8234	8.71083e-06	1.58773e-07	9.03526e-07	4.56288e-08	5.75656e-05	0.000682096	0.000195326	0.00393	0.99512
		7.8358	1.16951e-05	0.00244	0.04258	0.95497		7.8358	0.000418552	1.07533e-05	3.12412e-06	5.37949e-06	0.000498853	0.00591	0.00169	0.03411	0.95735							7.8358	1.16504e-05	0.00258	0.02857	0.96884		7.8358	8.65155e-06	1.57827e-07	8.98235e-07	4.54003e-08	5.74068e-05	0.000680252	0.000194954	0.00393	0.99513
		7.8482	1.16627e-05	0.00244	0.04255	0.955		7.8482	0.00041562	1.06873e-05	3.1053e-06	5.35117e-06	0.000497404	0.00589	0.00169	0.03405	0.95744							7.8482	1.1619e-05	0.00257	0.02855	0.96886		7.8482	8.593e-06	1.56894e-07	8.93023e-07	4.51723e-08	5.72525e-05	0.000678444	0.00019458	0.00392	0.99514
		7.8606	1.16305e-05	0.00244	0.04253	0.95503		7.8606	0.000412734	1.0622e-05	3.0866e-06	5.32307e-06	0.000495959	0.00588	0.00169	0.03399	0.95752							7.8606	1.15878e-05	0.00257	0.02854	0.96888		7.8606	8.53472e-06	1.55966e-07	8.87818e-07	4.49454e-08	5.70975e-05	0.000676614	0.000194226	0.00391	0.99515
		7.873	1.15982e-05	0.00243	0.0425	0.95506		7.873	0.000409856	1.05572e-05	3.06804e-06	5.29509e-06	0.000494522	0.00586	0.00168	0.03393	0.95761							7.873	1.1557e-05	0.00257	0.02852	0.96889		7.873	8.47728e-06	1.55051e-07	8.82694e-07	4.4722e-08	5.69442e-05	0.000674825	0.000193854	0.00391	0.99516
		7.88539	1.15664e-05	0.00243	0.04247	0.95509		7.88539	0.000407015	1.0493e-05	3.04972e-06	5.26747e-06	0.000493082	0.00584	0.00168	0.03387	0.95769							7.88539	1.15262e-05	0.00257	0.02851	0.96891		7.88539	8.42024e-06	1.5414e-07	8.77587e-07	4.44987e-08	5.67899e-05	0.000673038	0.000193486	0.0039	0.99516
		7.89779	1.15348e-05	0.00243	0.04244	0.95512		7.89779	0.000404214	1.04295e-05	3.03157e-06	5.24018e-06	0.000491667	0.00583	0.00168	0.03381	0.95778							7.89779	1.14956e-05	0.00257	0.02849	0.96893		7.89779	8.36382e-06	1.53239e-07	8.72548e-07	4.4279e-08	5.66392e-05	0.000671265	0.000193136	0.0039	0.99517
		7.91019	1.15032e-05	0.00243	0.04241	0.95515		7.91019	0.000401422	1.03666e-05	3.01358e-06	5.21299e-06	0.000490264	0.00581	0.00167	0.03375	0.95786							7.91019	1.14651e-05	0.00256	0.02848	0.96895		7.91019	8.30808e-06	1.52346e-07	8.6755e-07	4.40613e-08	5.64881e-05	0.000669496	0.000192762	0.00389	0.99518
		7.92259	1.14719e-05	0.00242	0.04239	0.95518		7.92259	0.00039866	1.03041e-05	2.9957e-06	5.18591e-06	0.000488858	0.00579	0.00167	0.03369	0.95794							7.92259	1.1435e-05	0.00256	0.02846	0.96896		7.92259	8.25282e-06	1.51463e-07	8.62599e-07	4.38435e-08	5.63384e-05	0.000667741	0.000192418	0.00388	0.99519
		7.93499	1.14407e-05	0.00242	0.04236	0.95521		7.93499	0.000395937	1.02425e-05	2.97815e-06	5.15928e-06	0.000487467	0.00578	0.00167	0.03363	0.95803							7.93499	1.14048e-05	0.00256	0.02845	0.96898		7.93499	8.19809e-06	1.50587e-07	8.57685e-07	4.36295e-08	5.61887e-05	0.000666001	0.000192052	0.00388	0.9952
		7.94739	1.14097e-05	0.00242	0.04233	0.95524		7.94739	0.000393246	1.01813e-05	2.96054e-06	5.13283e-06	0.000486076	0.00576	0.00166	0.03357	0.95811							7.94739	1.13751e-05	0.00256	0.02843	0.969		7.94739	8.14398e-06	1.49718e-07	8.52827e-07	4.34165e-08	5.60416e-05	0.000664268	0.000191703	0.00387	0.99521
		7.95979	1.13791e-05	0.00242	0.0423	0.95527		7.95979	0.000390576	1.01206e-05	2.94326e-06	5.1065e-06	0.000484702	0.00575	0.00166	0.03351	0.95819							7.95979	1.13454e-05	0.00256	0.02842	0.96901		7.95979	8.09047e-06	1.48852e-07	8.48019e-07	4.32055e-08	5.58942e-05	0.00066255	0.000191358	0.00387	0.99521
		7.97218	1.13484e-05	0.00242	0.04228	0.9553		7.97218	0.000387924	1.00606e-05	2.92605e-06	5.0805e-06	0.000483337	0.00573	0.00166	0.03345	0.95827							7.97218	1.13158e-05	0.00255	0.02841	0.96903		7.97218	8.03737e-06	1.48012e-07	8.43242e-07	4.29954e-08	5.57476e-05	0.000660827	0.000190999	0.00386	0.99522
		7.98458	1.13181e-05	0.00241	0.04225	0.95533		7.98458	0.00038531	1.0001e-05	2.90901e-06	5.05469e-06	0.000481979	0.00571	0.00165	0.0334	0.95835							7.98458	1.12864e-05	0.00255	0.02839	0.96905		7.98458	7.98468e-06	1.47166e-07	8.38504e-07	4.27874e-08	5.56019e-05	0.000659124	0.000190656	0.00385	0.99523
		7.99698	1.12878e-05	0.00241	0.04222	0.95535		7.99698	0.000382723	9.94213e-06	2.89218e-06	5.02917e-06	0.000480623	0.0057	0.00165	0.03334	0.95843							7.99698	1.12574e-05	0.00255	0.02838	0.96906		7.99698	7.93274e-06	1.46326e-07	8.33823e-07	4.2582e-08	5.54574e-05	0.00065744	0.000190312	0.00385	0.99524
		8.00938	1.12577e-05	0.00241	0.0422	0.95538		8.00938	0.000380154	9.88361e-06	2.87547e-06	5.00377e-06	0.000479283	0.00568	0.00165	0.03328	0.95852							8.00938	1.12283e-05	0.00255	0.02836	0.96908		8.00938	7.88109e-06	1.45496e-07	8.29165e-07	4.23769e-08	5.5313e-05	0.000655757	0.000189967	0.00384	0.99525
		8.02178	1.12279e-05	0.00241	0.04217	0.95541		8.02178	0.000377618	9.82581e-06	2.85895e-06	4.97861e-06	0.000477949	0.00567	0.00164	0.03322	0.95859							8.02178	1.11995e-05	0.00255	0.02835	0.9691		8.02178	7.83016e-06	1.44677e-07	8.24556e-07	4.21744e-08	5.51708e-05	0.000654084	0.00018962	0.00384	0.99526
		8.03418	1.11983e-05	0.00241	0.04214	0.95544		8.03418	0.000375099	9.76888e-06	2.84248e-06	4.95368e-06	0.000476625	0.00565	0.00164	0.03317	0.95867							8.03418	1.11707e-05	0.00254	0.02833	0.96911		8.03418	7.77965e-06	1.4386e-07	8.2e-07	4.19736e-08	5.50287e-05	0.000652429	0.000189282	0.00383	0.99526
		8.04657	1.11687e-05	0.0024	0.04212	0.95547		8.04657	0.000372592	9.71165e-06	2.82606e-06	4.92871e-06	0.000475293	0.00564	0.00164	0.03311	0.95875							8.04657	1.11422e-05	0.00254	0.02832	0.96913		8.04657	7.72968e-06	1.43055e-07	8.15471e-07	4.17735e-08	5.48885e-05	0.000650774	0.000188947	0.00383	0.99527
		8.05897	1.11394e-05	0.0024	0.04209	0.9555		8.05897	0.000370159	9.65609e-06	2.8102e-06	4.90459e-06	0.000474017	0.00562	0.00163	0.03306	0.95883							8.05897	1.1114e-05	0.00254	0.0283	0.96914		8.05897	7.68007e-06	1.42257e-07	8.10981e-07	4.15758e-08	5.47479e-05	0.000649134	0.000188607	0.00382	0.99528
		8.07137	1.11102e-05	0.0024	0.04206	0.95553		8.07137	0.000367702	9.59941e-06	2.79407e-06	4.87996e-06	0.000472693	0.0056	0.00163	0.033	0.95891							8.07137	1.10857e-05	0.00254	0.02829	0.96916		8.07137	7.63083e-06	1.41458e-07	8.06526e-07	4.13785e-08	5.46079e-05	0.000647493	0.000188272	0.00381	0.99529
		8.08377	1.10812e-05	0.0024	0.04204	0.95555		8.08377	0.000365294	9.54434e-06	2.77829e-06	4.85593e-06	0.000471406	0.00559	0.00163	0.03294	0.95899							8.08377	1.10578e-05	0.00254	0.02828	0.96918		8.08377	7.58227e-06	1.40672e-07	8.02119e-07	4.11842e-08	5.44692e-05	0.000645869	0.000187933	0.00381	0.99529
		8.09617	1.10523e-05	0.0024	0.04201	0.95558		8.09617	0.000362894	9.48938e-06	2.76261e-06	4.83192e-06	0.000470115	0.00557	0.00162	0.03289	0.95906							8.09617	1.10298e-05	0.00253	0.02826	0.96919		8.09617	7.53406e-06	1.3989e-07	7.97738e-07	4.09912e-08	5.43308e-05	0.000644253	0.000187606	0.0038	0.9953
		8.10857	1.10235e-05	0.00239	0.04198	0.95561		8.10857	0.000360539	9.43543e-06	2.7472e-06	4.80844e-06	0.000468868	0.00556	0.00162	0.03284	0.95914							8.10857	1.10021e-05	0.00253	0.02825	0.96921		8.10857	7.48659e-06	1.39123e-07	7.93425e-07	4.08e-08	5.41949e-05	0.00064266	0.000187281	0.0038	0.99531
		8.12096	1.09951e-05	0.00239	0.04196	0.95564		8.12096	0.000358174	9.38123e-06	2.73162e-06	4.78468e-06	0.000467574	0.00554	0.00162	0.03278	0.95922							8.12096	1.09746e-05	0.00253	0.02823	0.96922		8.12096	7.4394e-06	1.38361e-07	7.89145e-07	4.06103e-08	5.40598e-05	0.000641073	0.000186952	0.00379	0.99532
		8.13336	1.09668e-05	0.00239	0.04193	0.95567		8.13336	0.00035586	9.32833e-06	2.71641e-06	4.76144e-06	0.000466324	0.00553	0.00161	0.03273	0.95929							8.13336	1.09473e-05	0.00253	0.02822	0.96924		8.13336	7.39289e-06	1.37605e-07	7.8492e-07	4.04235e-08	5.39258e-05	0.000639513	0.000186629	0.00379	0.99533
		8.14576	1.09385e-05	0.00239	0.04191	0.95569		8.14576	0.000353564	9.27548e-06	2.70134e-06	4.73835e-06	0.000465073	0.00552	0.00161	0.03267	0.95937							8.14576	1.09201e-05	0.00253	0.02821	0.96926		8.14576	7.34616e-06	1.36845e-07	7.80658e-07	4.02342e-08	5.37888e-05	0.000637907	0.000186298	0.00378	0.99533
		8.15816	1.09105e-05	0.00239	0.04188	0.95572		8.15816	0.000351268	9.22292e-06	2.68622e-06	4.71516e-06	0.000463801	0.0055	0.00161	0.03262	0.95944							8.15816	1.08929e-05	0.00252	0.02819	0.96927		8.15816	7.30072e-06	1.36103e-07	7.76483e-07	4.00512e-08	5.36585e-05	0.000636375	0.000185983	0.00378	0.99534
		8.17056	1.08827e-05	0.00238	0.04186	0.95575		8.17056	0.000349023	9.17075e-06	2.67138e-06	4.69247e-06	0.000462577	0.00549	0.0016	0.03256	0.95952							8.17056	1.0866e-05	0.00252	0.02818	0.96929		8.17056	7.25509e-06	1.35366e-07	7.72391e-07	3.98663e-08	5.35243e-05	0.000634807	0.000185657	0.00377	0.99535
		8.18296	1.0855e-05	0.00238	0.04183	0.95578		8.18296	0.000346782	9.1192e-06	2.65659e-06	4.66983e-06	0.000461342	0.00547	0.0016	0.03251	0.95959							8.18296	1.08393e-05	0.00252	0.02816	0.9693		8.18296	7.2099e-06	1.34632e-07	7.68224e-07	3.96839e-08	5.3393e-05	0.00063327	0.000185342	0.00376	0.99536
		8.19536	1.08273e-05	0.00238	0.04181	0.9558		8.19536	0.000344569	9.06838e-06	2.64201e-06	4.64743e-06	0.000460119	0.00546	0.0016	0.03246	0.95967							8.19536	1.08127e-05	0.00252	0.02815	0.96932		8.19536	7.16543e-06	1.33904e-07	7.64172e-07	3.9501e-08	5.3259e-05	0.000631701	0.000185013	0.00376	0.99536
		8.20775	1.08002e-05	0.00238	0.04178	0.95583		8.20775	0.000342381	9.01787e-06	2.62752e-06	4.62518e-06	0.000458901	0.00544	0.00159	0.03241	0.95974							8.20775	1.07862e-05	0.00252	0.02814	0.96933		8.20775	7.12086e-06	1.33181e-07	7.60093e-07	3.93217e-08	5.3129e-05	0.000630175	0.000184698	0.00375	0.99537
		8.22015	1.07729e-05	0.00238	0.04176	0.95586		8.22015	0.000340217	8.96837e-06	2.61327e-06	4.6033e-06	0.000457707	0.00543	0.00159	0.03235	0.95981							8.22015	1.07598e-05	0.00252	0.02812	0.96935		8.22015	7.07781e-06	1.32474e-07	7.56143e-07	3.91443e-08	5.30003e-05	0.000628706	0.000184391	0.00375	0.99538
		8.23255	1.07453e-05	0.00237	0.04173	0.95588		8.23255	0.000338068	8.91844e-06	2.59905e-06	4.58144e-06	0.000456502	0.00542	0.00159	0.0323	0.95988							8.23255	1.07331e-05	0.00251	0.02811	0.96937		8.23255	7.03419e-06	1.31763e-07	7.5211e-07	3.89663e-08	5.28694e-05	0.000627173	0.00018407	0.00374	0.99539
		8.24495	1.07191e-05	0.00237	0.04171	0.95591		8.24495	0.000335938	8.86932e-06	2.58491e-06	4.55971e-06	0.000455311	0.0054	0.00159	0.03225	0.95996							8.24495	1.07076e-05	0.00251	0.0281	0.96938		8.24495	6.99122e-06	1.31064e-07	7.4818e-07	3.87908e-08	5.27417e-05	0.000625654	0.00018376	0.00374	0.99539
		8.25735	1.06915e-05	0.00237	0.04168	0.95594		8.25735	0.000333827	8.82017e-06	2.5709e-06	4.53816e-06	0.000454117	0.00539	0.00158	0.0322	0.96003							8.25735	1.06817e-05	0.00251	0.02808	0.9694		8.25735	6.94859e-06	1.30371e-07	7.44311e-07	3.8618e-08	5.2616e-05	0.000624173	0.000183456	0.00373	0.9954
		8.26975	1.0665e-05	0.00237	0.04166	0.95597		8.26975	0.000331745	8.7721e-06	2.55712e-06	4.51693e-06	0.00045295	0.00537	0.00158	0.03215	0.9601							8.26975	1.06556e-05	0.00251	0.02807	0.96941		8.26975	6.90674e-06	1.29677e-07	7.40431e-07	3.84442e-08	5.2488e-05	0.000622666	0.000183144	0.00373	0.99541
		8.28214	1.06393e-05	0.00237	0.04163	0.95599		8.28214	0.000329678	8.72435e-06	2.54339e-06	4.49577e-06	0.000451776	0.00536	0.00158	0.0321	0.96017							8.28214	1.06295e-05	0.00251	0.02806	0.96943		8.28214	6.86505e-06	1.28997e-07	7.36593e-07	3.82736e-08	5.23626e-05	0.000621223	0.000182841	0.00372	0.99541
		8.29454	1.06123e-05	0.00236	0.04161	0.95602		8.29454	0.000327617	8.67666e-06	2.52968e-06	4.47469e-06	0.000450612	0.00535	0.00157	0.03205	0.96024							8.29454	1.06049e-05	0.0025	0.02804	0.96944		8.29454	6.82346e-06	1.28318e-07	7.32782e-07	3.81031e-08	5.22347e-05	0.000619731	0.000182533	0.00372	0.99542
		8.30694	1.0587e-05	0.00236	0.04158	0.95604		8.30694	0.000325596	8.62956e-06	2.51624e-06	4.45398e-06	0.000449454	0.00533	0.00157	0.032	0.96031							8.30694	1.05801e-05	0.0025	0.02803	0.96946		8.30694	6.7826e-06	1.27647e-07	7.29058e-07	3.79349e-08	5.21138e-05	0.000618297	0.000182233	0.00371	0.99543
		8.31934	1.05598e-05	0.00236	0.04156	0.95607		8.31934	0.000323577	8.58289e-06	2.50284e-06	4.43332e-06	0.000448274	0.00532	0.00157	0.03195	0.96038							8.31934	1.05541e-05	0.0025	0.02802	0.96947		8.31934	6.74221e-06	1.26985e-07	7.25295e-07	3.77683e-08	5.19916e-05	0.000616844	0.000181935	0.00371	0.99544
		8.33174	1.05342e-05	0.00236	0.04153	0.9561		8.33174	0.000321582	8.53637e-06	2.48953e-06	4.41277e-06	0.000447156	0.00531	0.00157	0.03189	0.96045							8.33174	1.05289e-05	0.0025	0.028	0.96949		8.33174	6.70177e-06	1.26322e-07	7.21582e-07	3.76009e-08	5.18637e-05	0.000615368	0.00018163	0.0037	0.99544
		8.34414	1.05084e-05	0.00236	0.04151	0.95612		8.34414	0.000319619	8.4909e-06	2.47646e-06	4.3924e-06	0.000446022	0.00529	0.00156	0.03185	0.96052							8.34414	1.05037e-05	0.0025	0.02799	0.9695		8.34414	6.66172e-06	1.25666e-07	7.17914e-07	3.74362e-08	5.17424e-05	0.000613948	0.00018133	0.0037	0.99545
		8.35653	1.04834e-05	0.00235	0.04149	0.95615		8.35653	0.000317659	8.4452e-06	2.46337e-06	4.37212e-06	0.000444901	0.00528	0.00156	0.0318	0.96059							8.35653	1.048e-05	0.0025	0.02798	0.96952		8.35653	6.62244e-06	1.25019e-07	7.14238e-07	3.72726e-08	5.16228e-05	0.00061253	0.000181035	0.00369	0.99546
		8.36893	1.04576e-05	0.00235	0.04146	0.95617		8.36893	0.00031572	8.40017e-06	2.45041e-06	4.352e-06	0.000443758	0.00527	0.00156	0.03175	0.96066							8.36893	1.04554e-05	0.00249	0.02796	0.96953		8.36893	6.58357e-06	1.24376e-07	7.10649e-07	3.7111e-08	5.15013e-05	0.000611119	0.000180739	0.00369	0.99546
		8.38133	1.04324e-05	0.00235	0.04144	0.9562		8.38133	0.000313801	8.35559e-06	2.43759e-06	4.33227e-06	0.000442654	0.00525	0.00155	0.0317	0.96072							8.38133	1.04307e-05	0.00249	0.02795	0.96955		8.38133	6.54444e-06	1.23731e-07	7.07027e-07	3.69485e-08	5.13801e-05	0.000609687	0.00018044	0.00368	0.99547
		8.39373	1.04073e-05	0.00235	0.04142	0.95622		8.39373	0.0003119	8.31129e-06	2.42487e-06	4.31249e-06	0.00044154	0.00524	0.00155	0.03165	0.96079							8.39373	1.0406e-05	0.00249	0.02794	0.96956		8.39373	6.50607e-06	1.23103e-07	7.0348e-07	3.67894e-08	5.12598e-05	0.000608324	0.000180151	0.00368	0.99548
		8.40613	1.03815e-05	0.00235	0.04139	0.95625		8.40613	0.00031001	8.26715e-06	2.41221e-06	4.29277e-06	0.000440424	0.00523	0.00155	0.0316	0.96086							8.40613	1.03822e-05	0.00249	0.02793	0.96957		8.40613	6.46817e-06	1.22477e-07	6.99971e-07	3.66309e-08	5.11424e-05	0.000606925	0.000179861	0.00367	0.99548
		8.41853	1.03571e-05	0.00235	0.04137	0.95628		8.41853	0.00030814	8.22331e-06	2.39971e-06	4.27346e-06	0.000439308	0.00521	0.00155	0.03155	0.96093							8.41853	1.03575e-05	0.00249	0.02791	0.96959		8.41853	6.43024e-06	1.21852e-07	6.96447e-07	3.64735e-08	5.10226e-05	0.000605511	0.000179567	0.00367	0.99549
		8.43093	1.03322e-05	0.00234	0.04134	0.9563		8.43093	0.000306311	8.18023e-06	2.38734e-06	4.25417e-06	0.000438243	0.0052	0.00154	0.03151	0.96099							8.43093	1.03337e-05	0.00248	0.0279	0.96961		8.43093	6.39275e-06	1.21234e-07	6.92992e-07	3.63184e-08	5.09079e-05	0.000604158	0.000179282	0.00366	0.9955
		8.44332	1.03073e-05	0.00234	0.04132	0.95633		8.44332	0.000304453	8.13727e-06	2.375e-06	4.23517e-06	0.000437133	0.00519	0.00154	0.03146	0.96106							8.44332	1.03099e-05	0.00248	0.02789	0.96962		8.44332	6.35569e-06	1.20621e-07	6.89562e-07	3.61615e-08	5.07882e-05	0.000602791	0.000178996	0.00366	0.9955
		8.45572	1.02832e-05	0.00234	0.0413	0.95635		8.45572	0.000302658	8.09505e-06	2.36286e-06	4.21632e-06	0.00043608	0.00518	0.00154	0.03141	0.96113							8.45572	1.02863e-05	0.00248	0.02787	0.96963		8.45572	6.31894e-06	1.20012e-07	6.86147e-07	3.60087e-08	5.06723e-05	0.000601428	0.000178708	0.00365	0.99551
		8.46812	1.02585e-05	0.00234	0.04127	0.95638		8.46812	0.000300838	8.05275e-06	2.35071e-06	4.1972e-06	0.000434979	0.00516	0.00153	0.03136	0.96119							8.46812	1.02627e-05	0.00248	0.02786	0.96965		8.46812	6.2827e-06	1.19409e-07	6.82734e-07	3.58529e-08	5.05557e-05	0.000600055	0.000178423	0.00365	0.99552
		8.48052	1.02347e-05	0.00234	0.04125	0.9564		8.48052	0.000299063	8.011e-06	2.33872e-06	4.17855e-06	0.000433905	0.00515	0.00153	0.03131	0.96126							8.48052	1.02393e-05	0.00248	0.02785	0.96966		8.48052	6.24655e-06	1.18813e-07	6.79373e-07	3.57026e-08	5.04431e-05	0.000598719	0.00017814	0.00364	0.99552
		8.49292	1.02104e-05	0.00233	0.04123	0.95643		8.49292	0.000297293	7.96945e-06	2.32681e-06	4.16015e-06	0.000432857	0.00514	0.00153	0.03127	0.96132							8.49292	1.02154e-05	0.00248	0.02784	0.96968		8.49292	6.21072e-06	1.18222e-07	6.76051e-07	3.55512e-08	5.03274e-05	0.000597375	0.000177859	0.00364	0.99553
		8.50532	1.01863e-05	0.00233	0.0412	0.95645		8.50532	0.000295542	7.92834e-06	2.31501e-06	4.1416e-06	0.000431795	0.00513	0.00153	0.03122	0.96139							8.50532	1.01923e-05	0.00247	0.02782	0.96969		8.50532	6.17523e-06	1.17632e-07	6.72737e-07	3.54027e-08	5.02149e-05	0.000596051	0.00017758	0.00363	0.99554
		8.51771	1.01624e-05	0.00233	0.04118	0.95648		8.51771	0.000293809	7.88754e-06	2.30331e-06	4.12334e-06	0.000430756	0.00511	0.00152	0.03117	0.96145							8.51771	1.01688e-05	0.00247	0.02781	0.96971		8.51771	6.14026e-06	1.17049e-07	6.69478e-07	3.52538e-08	5.01014e-05	0.000594732	0.000177302	0.00363	0.99554
		8.53011	1.01387e-05	0.00233	0.04116	0.9565		8.53011	0.000292088	7.84742e-06	2.29169e-06	4.10529e-06	0.000429711	0.0051	0.00152	0.03113	0.96151							8.53011	1.01461e-05	0.00247	0.0278	0.96972		8.53011	6.10545e-06	1.16473e-07	6.66208e-07	3.51066e-08	4.99888e-05	0.000593408	0.000177025	0.00362	0.99555
		8.54251	1.01153e-05	0.00233	0.04114	0.95653		8.54251	0.000290388	7.80731e-06	2.28029e-06	4.08745e-06	0.000428678	0.00509	0.00152	0.03108	0.96158							8.54251	1.01236e-05	0.00247	0.02779	0.96973		8.54251	6.07085e-06	1.15897e-07	6.62983e-07	3.49597e-08	4.98774e-05	0.000592102	0.000176747	0.00362	0.99556
		8.55491	1.00915e-05	0.00233	0.04111	0.95655		8.55491	0.000288686	7.7674e-06	2.26877e-06	4.06957e-06	0.000427651	0.00508	0.00152	0.03103	0.96164							8.55491	1.01003e-05	0.00247	0.02777	0.96975		8.55491	6.03664e-06	1.15329e-07	6.59791e-07	3.48151e-08	4.97661e-05	0.000590804	0.000176475	0.00361	0.99556
		8.56731	1.00681e-05	0.00232	0.04109	0.95657		8.56731	0.000287019	7.72802e-06	2.25752e-06	4.0518e-06	0.000426621	0.00506	0.00151	0.03099	0.9617							8.56731	1.00783e-05	0.00247	0.02776	0.96976		8.56731	6.00262e-06	1.14764e-07	6.56609e-07	3.46715e-08	4.96554e-05	0.00058949	0.000176199	0.00361	0.99557
		8.57971	1.0045e-05	0.00232	0.04107	0.9566		8.57971	0.000285355	7.68878e-06	2.24624e-06	4.03415e-06	0.000425588	0.00505	0.00151	0.03094	0.96177							8.57971	1.00555e-05	0.00246	0.02775	0.96977		8.57971	5.96897e-06	1.14204e-07	6.53454e-07	3.45284e-08	4.95444e-05	0.000588196	0.000175927	0.0036	0.99558
		8.5921	1.00217e-05	0.00232	0.04104	0.95662		8.5921	0.000283717	7.65019e-06	2.23514e-06	4.01686e-06	0.000424574	0.00504	0.00151	0.0309	0.96183							8.5921	1.0033e-05	0.00246	0.02774	0.96979		8.5921	5.93571e-06	1.13647e-07	6.50327e-07	3.43869e-08	4.94358e-05	0.000586921	0.000175654	0.0036	0.99558
		8.6045	9.99916e-06	0.00232	0.04102	0.95665		8.6045	0.000282086	7.61153e-06	2.22407e-06	3.99947e-06	0.000423566	0.00503	0.00151	0.03085	0.96189							8.6045	1.00109e-05	0.00246	0.02773	0.9698		8.6045	5.90271e-06	1.13099e-07	6.47235e-07	3.42452e-08	4.93274e-05	0.000585646	0.000175388	0.00359	0.99559
		8.6169	9.97603e-06	0.00232	0.041	0.95667		8.6169	0.000280466	7.57348e-06	2.21308e-06	3.9822e-06	0.000422567	0.00502	0.0015	0.03081	0.96195							8.6169	9.98851e-06	0.00246	0.02771	0.96982		8.6169	5.86997e-06	1.12551e-07	6.44152e-07	3.4105e-08	4.92197e-05	0.000584389	0.000175121	0.00359	0.99559
		8.6293	9.95325e-06	0.00232	0.04098	0.95669		8.6293	0.00027887	7.53564e-06	2.2021e-06	3.96514e-06	0.000421564	0.00501	0.0015	0.03076	0.96202							8.6293	9.96653e-06	0.00246	0.0277	0.96983		8.6293	5.83726e-06	1.12007e-07	6.41095e-07	3.39661e-08	4.91101e-05	0.000583121	0.00017485	0.00359	0.9956
		8.6417	9.93086e-06	0.00231	0.04096	0.95672		8.6417	0.000277265	7.49796e-06	2.19136e-06	3.94823e-06	0.000420566	0.00499	0.0015	0.03072	0.96208							8.6417	9.9449e-06	0.00246	0.02769	0.96984		8.6417	5.80515e-06	1.11468e-07	6.38077e-07	3.3828e-08	4.90037e-05	0.000581854	0.000174585	0.00358	0.99561
		8.6541	9.90795e-06	0.00231	0.04093	0.95674		8.6541	0.000275704	7.46069e-06	2.1807e-06	3.93149e-06	0.000419592	0.00498	0.0015	0.03068	0.96214							8.6541	9.92317e-06	0.00245	0.02768	0.96986		8.6541	5.77326e-06	1.10935e-07	6.35063e-07	3.36916e-08	4.88971e-05	0.000580609	0.000174321	0.00358	0.99561
		8.6665	9.8859e-06	0.00231	0.04091	0.95677		8.6665	0.000274133	7.42382e-06	2.17008e-06	3.91483e-06	0.000418611	0.00497	0.00149	0.03063	0.9622							8.6665	9.90135e-06	0.00245	0.02767	0.96987		8.6665	5.74149e-06	1.10405e-07	6.32091e-07	3.35562e-08	4.87924e-05	0.000579365	0.000174058	0.00357	0.99562
		8.67889	9.86381e-06	0.00231	0.04089	0.95679		8.67889	0.000272587	7.38713e-06	2.15955e-06	3.89822e-06	0.000417634	0.00496	0.00149	0.03059	0.96226							8.67889	9.8795e-06	0.00245	0.02765	0.96988		8.67889	5.71024e-06	1.09881e-07	6.29129e-07	3.34208e-08	4.86863e-05	0.000578142	0.000173805	0.00357	0.99563
		8.69129	9.84131e-06	0.00231	0.04087	0.95681		8.69129	0.000271062	7.35075e-06	2.1491e-06	3.88179e-06	0.000416656	0.00495	0.00149	0.03054	0.96232							8.69129	9.85808e-06	0.00245	0.02764	0.9699		8.69129	5.67903e-06	1.09359e-07	6.26197e-07	3.32865e-08	4.8581e-05	0.000576905	0.000173534	0.00356	0.99563
		8.70369	9.81968e-06	0.00231	0.04085	0.95684		8.70369	0.000269541	7.31483e-06	2.13869e-06	3.86546e-06	0.000415696	0.00494	0.00149	0.0305	0.96238							8.70369	9.83665e-06	0.00245	0.02763	0.96991		8.70369	5.64825e-06	1.08842e-07	6.23282e-07	3.3154e-08	4.84783e-05	0.000575689	0.000173286	0.00356	0.99564
		8.71609	9.79769e-06	0.0023	0.04083	0.95686		8.71609	0.000268027	7.27891e-06	2.12838e-06	3.84919e-06	0.000414734	0.00493	0.00148	0.03046	0.96244							8.71609	9.81525e-06	0.00245	0.02762	0.96992		8.71609	5.61764e-06	1.08329e-07	6.20402e-07	3.30211e-08	4.83739e-05	0.000574478	0.000173023	0.00355	0.99564
		8.72849	9.77577e-06	0.0023	0.04081	0.95688		8.72849	0.000266536	7.24348e-06	2.11817e-06	3.83316e-06	0.000413784	0.00491	0.00148	0.03042	0.9625							8.72849	9.79391e-06	0.00245	0.02761	0.96994		8.72849	5.58731e-06	1.07819e-07	6.1752e-07	3.28896e-08	4.82704e-05	0.000573265	0.00017277	0.00355	0.99565
		8.74089	9.75398e-06	0.0023	0.04078	0.95691		8.74089	0.000265054	7.20827e-06	2.10809e-06	3.81714e-06	0.000412835	0.0049	0.00148	0.03037	0.96256							8.74089	9.77305e-06	0.00244	0.0276	0.96995		8.74089	5.55726e-06	1.07314e-07	6.1468e-07	3.27595e-08	4.81689e-05	0.000572059	0.00017251	0.00355	0.99566
		8.75328	9.73226e-06	0.0023	0.04076	0.95693		8.75328	0.000263581	7.17327e-06	2.098e-06	3.80127e-06	0.000411883	0.00489	0.00148	0.03033	0.96261							8.75328	9.75227e-06	0.00244	0.02758	0.96996		8.75328	5.52732e-06	1.06812e-07	6.11848e-07	3.26309e-08	4.8066e-05	0.000570868	0.00017225	0.00354	0.99566
		8.76568	9.71072e-06	0.0023	0.04074	0.95695		8.76568	0.000262134	7.13866e-06	2.08809e-06	3.78554e-06	0.000410953	0.00488	0.00147	0.03029	0.96267							8.76568	9.73121e-06	0.00244	0.02757	0.96998		8.76568	5.49789e-06	1.06316e-07	6.09048e-07	3.25024e-08	4.79656e-05	0.000569686	0.000172004	0.00354	0.99567
		8.77808	9.68934e-06	0.0023	0.04072	0.95697		8.77808	0.000260685	7.10428e-06	2.07819e-06	3.76999e-06	0.00041002	0.00487	0.00147	0.03024	0.96273							8.77808	9.71067e-06	0.00244	0.02756	0.96999		8.77808	5.46841e-06	1.05821e-07	6.06274e-07	3.23749e-08	4.78634e-05	0.000568491	0.000171745	0.00353	0.99567
		8.79048	9.66817e-06	0.00229	0.0407	0.957		8.79048	0.000259253	7.07013e-06	2.0684e-06	3.75444e-06	0.000409088	0.00486	0.00147	0.0302	0.96279							8.79048	9.6899e-06	0.00244	0.02755	0.97		8.79048	5.43947e-06	1.05332e-07	6.03507e-07	3.22485e-08	4.77635e-05	0.000567314	0.000171502	0.00353	0.99568
		8.80288	9.64717e-06	0.00229	0.04068	0.95702		8.80288	0.000257841	7.03634e-06	2.05864e-06	3.7391e-06	0.000408164	0.00485	0.00147	0.03016	0.96285							8.80288	9.66931e-06	0.00244	0.02754	0.97002		8.80288	5.41059e-06	1.04846e-07	6.00772e-07	3.21221e-08	4.76638e-05	0.000566153	0.000171252	0.00352	0.99569
		8.81528	9.62602e-06	0.00229	0.04066	0.95704		8.81528	0.000256433	7.00272e-06	2.04898e-06	3.72377e-06	0.000407247	0.00484	0.00146	0.03012	0.9629							8.81528	9.64891e-06	0.00243	0.02753	0.97003		8.81528	5.38197e-06	1.04363e-07	5.98051e-07	3.19976e-08	4.75646e-05	0.000564985	0.000170994	0.00352	0.99569
		8.82767	9.60514e-06	0.00229	0.04063	0.95707		8.82767	0.000255034	6.96937e-06	2.03937e-06	3.70859e-06	0.000406336	0.00483	0.00146	0.03008	0.96296							8.82767	9.62873e-06	0.00243	0.02751	0.97004		8.82767	5.35355e-06	1.03884e-07	5.95355e-07	3.18737e-08	4.7465e-05	0.000563823	0.000170755	0.00351	0.9957
		8.84007	9.58419e-06	0.00229	0.04061	0.95709		8.84007	0.000253641	6.93607e-06	2.0298e-06	3.69333e-06	0.000405407	0.00482	0.00146	0.03004	0.96302							8.84007	9.60843e-06	0.00243	0.0275	0.97006		8.84007	5.32543e-06	1.03408e-07	5.92675e-07	3.17504e-08	4.73672e-05	0.000562674	0.00017051	0.00351	0.9957
		8.85247	9.56351e-06	0.00229	0.04059	0.95711		8.85247	0.000252271	6.9033e-06	2.02031e-06	3.67835e-06	0.000404504	0.00481	0.00146	0.03	0.96307							8.85247	9.58838e-06	0.00243	0.02749	0.97007		8.85247	5.2975e-06	1.02937e-07	5.90018e-07	3.16281e-08	4.72697e-05	0.000561523	0.000170265	0.00351	0.99571
		8.86487	9.54281e-06	0.00228	0.04057	0.95713		8.86487	0.000250912	6.87091e-06	2.01099e-06	3.66363e-06	0.000403614	0.00479	0.00145	0.02996	0.96313							8.86487	9.56826e-06	0.00243	0.02748	0.97008		8.86487	5.26992e-06	1.02469e-07	5.87386e-07	3.15068e-08	4.71719e-05	0.000560381	0.000170015	0.0035	0.99571
		8.87727	9.5224e-06	0.00228	0.04055	0.95716		8.87727	0.000249563	6.83854e-06	2.00167e-06	3.64889e-06	0.000402721	0.00478	0.00145	0.02991	0.96319							8.87727	9.54842e-06	0.00243	0.02747	0.97009		8.87727	5.24217e-06	1.02004e-07	5.84745e-07	3.13845e-08	4.70738e-05	0.000559231	0.000169769	0.0035	0.99572
		8.88967	9.50205e-06	0.00228	0.04053	0.95718		8.88967	0.000248226	6.80643e-06	1.99247e-06	3.63415e-06	0.000401828	0.00477	0.00145	0.02987	0.96324							8.88967	9.52857e-06	0.00243	0.02746	0.97011		8.88967	5.21515e-06	1.01541e-07	5.82157e-07	3.12651e-08	4.69784e-05	0.000558111	0.00016953	0.00349	0.99573
		8.90207	9.48142e-06	0.00228	0.04051	0.9572		8.90207	0.000246896	6.77474e-06	1.98333e-06	3.61963e-06	0.000400945	0.00476	0.00145	0.02983	0.9633							8.90207	9.50904e-06	0.00242	0.02745	0.97012		8.90207	5.18813e-06	1.01087e-07	5.79584e-07	3.11474e-08	4.68836e-05	0.000556993	0.00016929	0.00349	0.99573
		8.91446	9.46147e-06	0.00228	0.04049	0.95722		8.91446	0.000245581	6.74314e-06	1.97425e-06	3.60522e-06	0.000400065	0.00475	0.00145	0.02979	0.96335							8.91446	9.48954e-06	0.00242	0.02744	0.97013		8.91446	5.16156e-06	1.00634e-07	5.77042e-07	3.10296e-08	4.67897e-05	0.000555896	0.00016906	0.00349	0.99574
		8.92686	9.44133e-06	0.00228	0.04047	0.95725		8.92686	0.000244274	6.71179e-06	1.96519e-06	3.59087e-06	0.00039919	0.00474	0.00144	0.02975	0.96341							8.92686	9.4698e-06	0.00242	0.02742	0.97015		8.92686	5.13495e-06	1.00183e-07	5.74501e-07	3.09121e-08	4.66946e-05	0.000554783	0.000168815	0.00348	0.99574
		8.93926	9.42129e-06	0.00228	0.04045	0.95727		8.93926	0.000242994	6.68098e-06	1.95631e-06	3.57676e-06	0.000398329	0.00473	0.00144	0.02971	0.96346							8.93926	9.45042e-06	0.00242	0.02741	0.97016		8.93926	5.10853e-06	9.97346e-08	5.7197e-07	3.07952e-08	4.65994e-05	0.000553667	0.000168574	0.00348	0.99575
		8.95166	9.40139e-06	0.00227	0.04043	0.95729		8.95166	0.000241701	6.64978e-06	1.94735e-06	3.5624e-06	0.000397449	0.00472	0.00144	0.02967	0.96351							8.95166	9.43114e-06	0.00242	0.0274	0.97017		8.95166	5.08245e-06	9.92905e-08	5.69472e-07	3.06799e-08	4.65062e-05	0.000552576	0.000168346	0.00347	0.99575
		8.96406	9.38163e-06	0.00227	0.04041	0.95731		8.96406	0.000240438	6.61951e-06	1.93867e-06	3.54855e-06	0.000396607	0.00471	0.00144	0.02964	0.96357							8.96406	9.41172e-06	0.00242	0.02739	0.97018		8.96406	5.05644e-06	9.88514e-08	5.6698e-07	3.05642e-08	4.6412e-05	0.000551475	0.000168102	0.00347	0.99576
		8.97646	9.3618e-06	0.00227	0.04039	0.95733		8.97646	0.000239165	6.58885e-06	1.92982e-06	3.53449e-06	0.000395737	0.0047	0.00143	0.0296	0.96362							8.97646	9.39269e-06	0.00241	0.02738	0.97019		8.97646	5.03071e-06	9.84106e-08	5.64503e-07	3.04498e-08	4.63189e-05	0.000550375	0.000167866	0.00347	0.99576
		8.98885	9.34219e-06	0.00227	0.04037	0.95735		8.98885	0.000237925	6.55909e-06	1.92121e-06	3.52073e-06	0.0003949	0.00469	0.00143	0.02956	0.96367							8.98885	9.37358e-06	0.00241	0.02737	0.97021		8.98885	5.00525e-06	9.79768e-08	5.62067e-07	3.03369e-08	4.62269e-05	0.000549303	0.000167638	0.00346	0.99577
		9.00125	9.32254e-06	0.00227	0.04035	0.95737		9.00125	0.000236673	6.5285e-06	1.9125e-06	3.50682e-06	0.000394034	0.00468	0.00143	0.02952	0.96373							9.00125	9.35464e-06	0.00241	0.02736	0.97022		9.00125	4.98002e-06	9.75509e-08	5.59636e-07	3.02244e-08	4.61358e-05	0.000548226	0.000167406	0.00346	0.99578
		9.01365	9.30335e-06	0.00227	0.04033	0.95739		9.01365	0.000235448	6.49917e-06	1.90399e-06	3.49328e-06	0.000393199	0.00467	0.00143	0.02948	0.96378							9.01365	9.33587e-06	0.00241	0.02735	0.97023		9.01365	4.95466e-06	9.71195e-08	5.57199e-07	3.0111e-08	4.60418e-05	0.00054713	0.000167167	0.00345	0.99578
		9.02605	9.28395e-06	0.00226	0.04031	0.95742		9.02605	0.000234223	6.46974e-06	1.89554e-06	3.47972e-06	0.000392363	0.00466	0.00143	0.02944	0.96383							9.02605	9.31686e-06	0.00241	0.02734	0.97024		9.02605	4.92974e-06	9.66911e-08	5.54808e-07	2.99999e-08	4.59507e-05	0.000546065	0.00016694	0.00345	0.99579
		9.03845	9.26459e-06	0.00226	0.04029	0.95744		9.03845	0.000233001	6.44047e-06	1.88705e-06	3.46608e-06	0.000391509	0.00465	0.00142	0.0294	0.96389							9.03845	9.29834e-06	0.00241	0.02733	0.97026		9.03845	4.90508e-06	9.62732e-08	5.52434e-07	2.98899e-08	4.58606e-05	0.000545007	0.000166714	0.00345	0.99579
		9.05085	9.24553e-06	0.00226	0.04027	0.95746		9.05085	0.000231814	6.41161e-06	1.87876e-06	3.4529e-06	0.000390698	0.00464	0.00142	0.02936	0.96394							9.05085	9.27957e-06	0.00241	0.02732	0.97027		9.05085	4.88079e-06	9.58598e-08	5.50096e-07	2.97818e-08	4.57725e-05	0.000543971	0.000166494	0.00344	0.9958
		9.06324	9.22654e-06	0.00226	0.04025	0.95748		9.06324	0.00023061	6.38236e-06	1.87032e-06	3.43944e-06	0.000389851	0.00463	0.00142	0.02933	0.96399							9.06324	9.26108e-06	0.0024	0.0273	0.97028		9.06324	4.85638e-06	9.54399e-08	5.47743e-07	2.96722e-08	4.56825e-05	0.000542911	0.000166262	0.00344	0.9958
		9.07564	9.20765e-06	0.00226	0.04023	0.9575		9.07564	0.000229432	6.35382e-06	1.86217e-06	3.42635e-06	0.000389044	0.00462	0.00142	0.02929	0.96404							9.07564	9.24267e-06	0.0024	0.02729	0.97029		9.07564	4.83233e-06	9.50269e-08	5.4542e-07	2.95644e-08	4.55939e-05	0.00054187	0.00016604	0.00343	0.99581
		9.08804	9.18867e-06	0.00226	0.04021	0.95752		9.08804	0.000228263	6.32554e-06	1.85401e-06	3.41325e-06	0.000388228	0.00461	0.00141	0.02925	0.96409							9.08804	9.22434e-06	0.0024	0.02728	0.97031		9.08804	4.80818e-06	9.46161e-08	5.43087e-07	2.94551e-08	4.55027e-05	0.000540809	0.000165804	0.00343	0.99581
		9.10044	9.16986e-06	0.00226	0.04019	0.95754		9.10044	0.000227095	6.29758e-06	1.84588e-06	3.4002e-06	0.000387413	0.0046	0.00141	0.02921	0.96414							9.10044	9.20632e-06	0.0024	0.02727	0.97032		9.10044	4.7846e-06	9.42136e-08	5.40816e-07	2.93498e-08	4.54166e-05	0.000539793	0.00016559	0.00343	0.99582
		9.11284	9.15122e-06	0.00225	0.04017	0.95756		9.11284	0.000225936	6.26923e-06	1.83775e-06	3.38719e-06	0.00038659	0.00459	0.00141	0.02918	0.9642							9.11284	9.18798e-06	0.0024	0.02726	0.97033		9.11284	4.76099e-06	9.38044e-08	5.38543e-07	2.92431e-08	4.53281e-05	0.000538756	0.000165365	0.00342	0.99582
		9.12524	9.13274e-06	0.00225	0.04015	0.95758		9.12524	0.000224792	6.24179e-06	1.82978e-06	3.37437e-06	0.000385792	0.00459	0.00141	0.02914	0.96425							9.12524	9.17003e-06	0.0024	0.02725	0.97034		9.12524	4.73767e-06	9.34056e-08	5.36251e-07	2.9138e-08	4.5241e-05	0.000537746	0.000165145	0.00342	0.99583
		9.13764	9.11428e-06	0.00225	0.04014	0.9576		9.13764	0.000223659	6.21425e-06	1.82184e-06	3.36164e-06	0.000384994	0.00458	0.00141	0.0291	0.9643							9.13764	9.15203e-06	0.0024	0.02724	0.97035		9.13764	4.71431e-06	9.3008e-08	5.34014e-07	2.90327e-08	4.5153e-05	0.00053671	0.000164917	0.00341	0.99583
		9.15003	9.09568e-06	0.00225	0.04011	0.95763		9.15003	0.000222525	6.18645e-06	1.81389e-06	3.34891e-06	0.000384185	0.00457	0.0014	0.02906	0.96435							9.15003	9.13401e-06	0.00239	0.02723	0.97037		9.15003	4.69134e-06	9.26123e-08	5.3181e-07	2.89285e-08	4.50666e-05	0.000535678	0.000164697	0.00341	0.99584
		9.16243	9.0775e-06	0.00225	0.0401	0.95765		9.16243	0.000221411	6.15955e-06	1.80611e-06	3.33636e-06	0.0003834	0.00456	0.0014	0.02903	0.9644							9.16243	9.11619e-06	0.00239	0.02722	0.97038		9.16243	4.66857e-06	9.22197e-08	5.29572e-07	2.88256e-08	4.4981e-05	0.000534675	0.00016448	0.00341	0.99584
		9.17483	9.05921e-06	0.00225	0.04008	0.95767		9.17483	0.000220301	6.13265e-06	1.79834e-06	3.32387e-06	0.000382613	0.00455	0.0014	0.02899	0.96445							9.17483	9.09843e-06	0.00239	0.02721	0.97039		9.17483	4.64575e-06	9.18314e-08	5.27374e-07	2.87233e-08	4.48955e-05	0.000533677	0.000164265	0.0034	0.99585
		9.18723	9.04103e-06	0.00225	0.04006	0.95769		9.18723	0.000219195	6.1056e-06	1.79059e-06	3.3114e-06	0.000381823	0.00454	0.0014	0.02895	0.9645							9.18723	9.08089e-06	0.00239	0.0272	0.9704		9.18723	4.62314e-06	9.1444e-08	5.25197e-07	2.86206e-08	4.48086e-05	0.000532662	0.000164045	0.0034	0.99585
		9.19963	9.02298e-06	0.00224	0.04004	0.95771		9.19963	0.000218109	6.07907e-06	1.78294e-06	3.29911e-06	0.000381035	0.00453	0.0014	0.02892	0.96455							9.19963	9.06325e-06	0.00239	0.02719	0.97041		9.19963	4.60118e-06	9.10624e-08	5.23024e-07	2.85203e-08	4.47273e-05	0.0005317	0.000163831	0.0034	0.99586
		9.21203	9.00506e-06	0.00224	0.04002	0.95773		9.21203	0.000217021	6.05279e-06	1.77531e-06	3.28676e-06	0.000380274	0.00452	0.00139	0.02888	0.9646							9.21203	9.04588e-06	0.00239	0.02718	0.97042		9.21203	4.5789e-06	9.06799e-08	5.20878e-07	2.84188e-08	4.46396e-05	0.000530683	0.000163613	0.00339	0.99586
		9.22442	8.98714e-06	0.00224	0.04	0.95775		9.22442	0.000215947	6.02666e-06	1.76775e-06	3.27459e-06	0.000379483	0.00451	0.00139	0.02885	0.96465							9.22442	9.02846e-06	0.00239	0.02717	0.97044		9.22442	4.55697e-06	9.03014e-08	5.18744e-07	2.83182e-08	4.45561e-05	0.000529718	0.000163396	0.00339	0.99587
		9.23682	8.9694e-06	0.00224	0.03998	0.95777		9.23682	0.000214882	6.00055e-06	1.76028e-06	3.26256e-06	0.000378722	0.0045	0.00139	0.02881	0.96469							9.23682	9.01116e-06	0.00238	0.02716	0.97045		9.23682	4.53524e-06	8.9924e-08	5.16607e-07	2.82188e-08	4.44711e-05	0.000528705	0.000163184	0.00338	0.99587
		9.24922	8.95154e-06	0.00224	0.03996	0.95779		9.24922	0.00021382	5.97477e-06	1.7528e-06	3.2505e-06	0.000377965	0.00449	0.00139	0.02877	0.96474							9.24922	8.99386e-06	0.00238	0.02715	0.97046		9.24922	4.51338e-06	8.95561e-08	5.14509e-07	2.81209e-08	4.43886e-05	0.000527765	0.000162977	0.00338	0.99588
		9.26162	8.93391e-06	0.00224	0.03995	0.95781		9.26162	0.000212774	5.94924e-06	1.74545e-06	3.23872e-06	0.000377193	0.00448	0.00139	0.02874	0.96479							9.26162	8.97673e-06	0.00238	0.02714	0.97047		9.26162	4.49222e-06	8.91841e-08	5.12417e-07	2.80227e-08	4.43091e-05	0.000526782	0.000162765	0.00338	0.99588
		9.27402	8.91651e-06	0.00224	0.03993	0.95783		9.27402	0.000211729	5.92345e-06	1.73806e-06	3.22664e-06	0.000376437	0.00448	0.00138	0.0287	0.96484							9.27402	8.95965e-06	0.00238	0.02713	0.97048		9.27402	4.47053e-06	8.88132e-08	5.10351e-07	2.79247e-08	4.42239e-05	0.000525815	0.000162552	0.00337	0.99589
		9.28642	8.89891e-06	0.00223	0.03991	0.95785		9.28642	0.000210693	5.89826e-06	1.73079e-06	3.21502e-06	0.000375678	0.00447	0.00138	0.02867	0.96489							9.28642	8.94277e-06	0.00238	0.02712	0.97049		9.28642	4.44962e-06	8.84509e-08	5.08299e-07	2.78282e-08	4.4142e-05	0.000524848	0.000162344	0.00337	0.99589
		9.29881	8.88158e-06	0.00223	0.03989	0.95787		9.29881	0.000209668	5.87306e-06	1.72352e-06	3.20307e-06	0.000374925	0.00446	0.00138	0.02863	0.96493							9.29881	8.92567e-06	0.00238	0.02711	0.97051		9.29881	4.42849e-06	8.80881e-08	5.06231e-07	2.7732e-08	4.40605e-05	0.000523883	0.000162137	0.00337	0.9959
		9.31121	8.86426e-06	0.00223	0.03987	0.95789		9.31121	0.00020865	5.84846e-06	1.71635e-06	3.1917e-06	0.00037418	0.00445	0.00138	0.0286	0.96498							9.31121	8.90882e-06	0.00238	0.0271	0.97052		9.31121	4.40773e-06	8.77262e-08	5.04202e-07	2.7636e-08	4.39782e-05	0.000522936	0.000161926	0.00336	0.9959
		9.32361	8.84698e-06	0.00223	0.03985	0.95791		9.32361	0.000207638	5.82362e-06	1.7092e-06	3.1799e-06	0.000373423	0.00444	0.00138	0.02856	0.96503							9.32361	8.89208e-06	0.00238	0.02709	0.97053		9.32361	4.38705e-06	8.73693e-08	5.02183e-07	2.75411e-08	4.38984e-05	0.000521979	0.000161721	0.00336	0.99591
		9.33601	8.83e-06	0.00223	0.03984	0.95793		9.33601	0.000206638	5.79915e-06	1.70213e-06	3.16851e-06	0.00037271	0.00443	0.00137	0.02853	0.96508							9.33601	8.87548e-06	0.00237	0.02708	0.97054		9.33601	4.36654e-06	8.70126e-08	5.00178e-07	2.74463e-08	4.38185e-05	0.000521043	0.000161512	0.00336	0.99591
		9.34841	8.81295e-06	0.00223	0.03982	0.95795		9.34841	0.00020564	5.77454e-06	1.69507e-06	3.15714e-06	0.000371969	0.00442	0.00137	0.02849	0.96512							9.34841	8.85889e-06	0.00237	0.02707	0.97055		9.34841	4.34607e-06	8.66624e-08	4.98177e-07	2.73528e-08	4.374e-05	0.000520114	0.000161309	0.00335	0.99592
		9.36081	8.79588e-06	0.00223	0.0398	0.95797		9.36081	0.000204653	5.75034e-06	1.68809e-06	3.14578e-06	0.000371229	0.00441	0.00137	0.02846	0.96517							9.36081	8.84234e-06	0.00237	0.02706	0.97056		9.36081	4.32588e-06	8.63118e-08	4.96199e-07	2.72591e-08	4.36592e-05	0.000519151	0.000161103	0.00335	0.99592
		9.3732	8.77891e-06	0.00222	0.03978	0.95799		9.3732	0.000203672	5.7263e-06	1.68113e-06	3.13457e-06	0.000370496	0.00441	0.00137	0.02843	0.96522							9.3732	8.82586e-06	0.00237	0.02705	0.97057		9.3732	4.30586e-06	8.59641e-08	4.94234e-07	2.71669e-08	4.35805e-05	0.000518228	0.000160901	0.00334	0.99593
		9.3856	8.76219e-06	0.00222	0.03976	0.958		9.3856	0.000202702	5.70248e-06	1.67425e-06	3.12328e-06	0.000369773	0.0044	0.00137	0.02839	0.96526							9.3856	8.80946e-06	0.00237	0.02704	0.97058		9.3856	4.28607e-06	8.5618e-08	4.92284e-07	2.70737e-08	4.35017e-05	0.000517316	0.000160699	0.00334	0.99593
		9.398	8.74538e-06	0.00222	0.03975	0.95802		9.398	0.000201736	5.67887e-06	1.66741e-06	3.11226e-06	0.000369044	0.00439	0.00136	0.02836	0.96531							9.398	8.79328e-06	0.00237	0.02703	0.97059		9.398	4.26632e-06	8.52751e-08	4.9033e-07	2.69838e-08	4.34206e-05	0.00051639	0.000160493	0.00334	0.99594
		9.4104	8.72876e-06	0.00222	0.03973	0.95804		9.4104	0.000200777	5.65519e-06	1.66061e-06	3.10123e-06	0.000368345	0.00438	0.00136	0.02832	0.96535							9.4104	8.77698e-06	0.00237	0.02702	0.97061		9.4104	4.24653e-06	8.49331e-08	4.88414e-07	2.68908e-08	4.33438e-05	0.000515467	0.000160294	0.00333	0.99594
		9.4228	8.71218e-06	0.00222	0.03971	0.95806		9.4228	0.000199828	5.6318e-06	1.65386e-06	3.09015e-06	0.000367627	0.00437	0.00136	0.02829	0.9654							9.4228	8.76094e-06	0.00236	0.02701	0.97062		9.4228	4.22702e-06	8.45959e-08	4.8649e-07	2.6801e-08	4.32666e-05	0.000514547	0.000160094	0.00333	0.99595
		9.4352	8.69571e-06	0.00222	0.03969	0.95808		9.4352	0.000198885	5.60861e-06	1.64716e-06	3.0794e-06	0.000366906	0.00436	0.00136	0.02826	0.96545							9.4352	8.74481e-06	0.00236	0.027	0.97063		9.4352	4.20782e-06	8.42593e-08	4.84609e-07	2.6712e-08	4.31891e-05	0.000513658	0.000159898	0.00333	0.99595
		9.4476	8.67923e-06	0.00222	0.03967	0.9581		9.4476	0.000197939	5.58564e-06	1.6405e-06	3.06845e-06	0.000366207	0.00436	0.00136	0.02822	0.96549							9.4476	8.72874e-06	0.00236	0.02699	0.97064		9.4476	4.18866e-06	8.39252e-08	4.82718e-07	2.66222e-08	4.31111e-05	0.000512739	0.000159699	0.00332	0.99596
		9.45999	8.66278e-06	0.00221	0.03966	0.95812		9.45999	0.000197024	5.56273e-06	1.63389e-06	3.05773e-06	0.000365493	0.00435	0.00135	0.02819	0.96553							9.45999	8.71287e-06	0.00236	0.02698	0.97065		9.45999	4.1696e-06	8.35943e-08	4.80844e-07	2.6534e-08	4.30348e-05	0.000511841	0.000159501	0.00332	0.99596
		9.47239	8.64658e-06	0.00221	0.03964	0.95814		9.47239	0.000196095	5.53982e-06	1.62731e-06	3.04709e-06	0.000364803	0.00434	0.00135	0.02816	0.96558							9.47239	8.69698e-06	0.00236	0.02697	0.97066		9.47239	4.1508e-06	8.32653e-08	4.78981e-07	2.6445e-08	4.29595e-05	0.000510952	0.000159305	0.00332	0.99597
		9.48479	8.63045e-06	0.00221	0.03962	0.95816		9.48479	0.000195174	5.51732e-06	1.62079e-06	3.03635e-06	0.000364099	0.00433	0.00135	0.02812	0.96562							9.48479	8.68122e-06	0.00236	0.02696	0.97067		9.48479	4.13189e-06	8.29375e-08	4.77112e-07	2.63583e-08	4.28834e-05	0.000510054	0.000159107	0.00331	0.99597
		9.49719	8.6142e-06	0.00221	0.0396	0.95818		9.49719	0.000194275	5.49498e-06	1.61432e-06	3.02585e-06	0.000363413	0.00432	0.00135	0.02809	0.96567							9.49719	8.66548e-06	0.00236	0.02695	0.97068		9.49719	4.11335e-06	8.26118e-08	4.75282e-07	2.62701e-08	4.28069e-05	0.000509169	0.000158911	0.00331	0.99597
		9.50959	8.59815e-06	0.00221	0.03959	0.9582		9.50959	0.000193374	5.47256e-06	1.60789e-06	3.01544e-06	0.000362709	0.00431	0.00135	0.02806	0.96571							9.50959	8.6499e-06	0.00236	0.02694	0.97069		9.50959	4.09484e-06	8.22893e-08	4.73456e-07	2.61835e-08	4.27323e-05	0.000508279	0.000158718	0.00331	0.99598
		9.52199	8.58213e-06	0.00221	0.03957	0.95821		9.52199	0.000192468	5.45052e-06	1.60148e-06	3.00493e-06	0.000362017	0.00431	0.00135	0.02803	0.96576							9.52199	8.63429e-06	0.00235	0.02693	0.9707		9.52199	4.07631e-06	8.19691e-08	4.71647e-07	2.60981e-08	4.2657e-05	0.000507414	0.000158524	0.0033	0.99598
		9.53438	8.56616e-06	0.00221	0.03955	0.95823		9.53438	0.000191589	5.42848e-06	1.59513e-06	2.99461e-06	0.000361333	0.0043	0.00134	0.02799	0.9658							9.53438	8.61876e-06	0.00235	0.02692	0.97071		9.53438	4.05811e-06	8.16502e-08	4.69849e-07	2.60136e-08	4.25823e-05	0.000506529	0.000158333	0.0033	0.99599
		9.54678	8.55034e-06	0.00221	0.03953	0.95825		9.54678	0.000190704	5.40672e-06	1.58884e-06	2.98429e-06	0.000360666	0.00429	0.00134	0.02796	0.96585							9.54678	8.60326e-06	0.00235	0.02691	0.97073		9.54678	4.04005e-06	8.13327e-08	4.68042e-07	2.59269e-08	4.25079e-05	0.000505653	0.000158139	0.0033	0.99599
		9.55918	8.53487e-06	0.0022	0.03952	0.95827		9.55918	0.000189823	5.3851e-06	1.58257e-06	2.97407e-06	0.000359977	0.00428	0.00134	0.02793	0.96589							9.55918	8.58789e-06	0.00235	0.0269	0.97074		9.55918	4.02205e-06	8.10185e-08	4.66273e-07	2.58441e-08	4.24346e-05	0.000504797	0.000157947	0.00329	0.996
		9.57158	8.51916e-06	0.0022	0.0395	0.95829		9.57158	0.000188956	5.36343e-06	1.57628e-06	2.96382e-06	0.00035931	0.00427	0.00134	0.0279	0.96593							9.57158	8.57265e-06	0.00235	0.02689	0.97075		9.57158	4.00428e-06	8.07075e-08	4.64504e-07	2.57587e-08	4.23604e-05	0.00050392	0.000157757	0.00329	0.996
		9.58398	8.5034e-06	0.0022	0.03948	0.95831		9.58398	0.000188089	5.34204e-06	1.57012e-06	2.95372e-06	0.000358638	0.00427	0.00134	0.02787	0.96598							9.58398	8.55723e-06	0.00235	0.02689	0.97076		9.58398	3.98661e-06	8.03969e-08	4.62754e-07	2.5676e-08	4.22872e-05	0.000503073	0.000157569	0.00329	0.99601
		9.59638	8.48788e-06	0.0022	0.03947	0.95832		9.59638	0.000187232	5.32082e-06	1.56404e-06	2.94369e-06	0.000357966	0.00426	0.00133	0.02783	0.96602							9.59638	8.54192e-06	0.00235	0.02687	0.97077		9.59638	3.96904e-06	8.009e-08	4.61005e-07	2.55933e-08	4.22146e-05	0.000502217	0.000157381	0.00328	0.99601
		9.60877	8.47249e-06	0.0022	0.03945	0.95834		9.60877	0.000186382	5.29966e-06	1.55789e-06	2.93367e-06	0.000357298	0.00425	0.00133	0.0278	0.96606							9.60877	8.52743e-06	0.00235	0.02687	0.97078		9.60877	3.95155e-06	7.97828e-08	4.59285e-07	2.55102e-08	4.21422e-05	0.000501363	0.000157189	0.00328	0.99601
		9.62117	8.45663e-06	0.0022	0.03943	0.95836		9.62117	0.000185539	5.2788e-06	1.55192e-06	2.92378e-06	0.000356646	0.00424	0.00133	0.02777	0.9661							9.62117	8.5121e-06	0.00234	0.02686	0.97079		9.62117	3.93421e-06	7.94784e-08	4.57551e-07	2.54279e-08	4.20703e-05	0.000500512	0.000157005	0.00328	0.99602
		9.63357	8.44216e-06	0.0022	0.03942	0.95838		9.63357	0.000184705	5.25799e-06	1.54581e-06	2.914e-06	0.000355978	0.00424	0.00133	0.02774	0.96615							9.63357	8.49702e-06	0.00234	0.02685	0.9708		9.63357	3.91689e-06	7.91771e-08	4.55854e-07	2.53478e-08	4.19976e-05	0.000499666	0.000156816	0.00327	0.99602
		9.64597	8.42664e-06	0.0022	0.0394	0.9584		9.64597	0.000183871	5.23729e-06	1.53982e-06	2.90412e-06	0.000355321	0.00423	0.00133	0.02771	0.96619							9.64597	8.48201e-06	0.00234	0.02684	0.97081		9.64597	3.8999e-06	7.88777e-08	4.54146e-07	2.52661e-08	4.19268e-05	0.000498834	0.00015663	0.00327	0.99603
		9.65837	8.41064e-06	0.00219	0.03938	0.95842		9.65837	0.000183046	5.21671e-06	1.53391e-06	2.89443e-06	0.000354668	0.00422	0.00133	0.02768	0.96623							9.65837	8.46725e-06	0.00234	0.02683	0.97082		9.65837	3.88288e-06	7.85784e-08	4.52461e-07	2.51853e-08	4.18555e-05	0.000497989	0.000156442	0.00327	0.99603
		9.67077	8.39564e-06	0.00219	0.03937	0.95843		9.67077	0.000182228	5.19631e-06	1.52807e-06	2.88478e-06	0.000354023	0.00421	0.00132	0.02765	0.96627							9.67077	8.45233e-06	0.00234	0.02682	0.97083		9.67077	3.866e-06	7.82827e-08	4.50789e-07	2.51053e-08	4.1785e-05	0.000497161	0.000156267	0.00326	0.99604
		9.68317	8.3802e-06	0.00219	0.03935	0.95845		9.68317	0.00018141	5.17605e-06	1.52224e-06	2.87509e-06	0.000353375	0.0042	0.00132	0.02761	0.96631							9.68317	8.43796e-06	0.00234	0.02681	0.97084		9.68317	3.84934e-06	7.79883e-08	4.49121e-07	2.50264e-08	4.17136e-05	0.000496339	0.000156083	0.00326	0.99604
		9.69556	8.36572e-06	0.00219	0.03933	0.95847		9.69556	0.000180603	5.15595e-06	1.51631e-06	2.86552e-06	0.000352728	0.0042	0.00132	0.02758	0.96636							9.69556	8.42296e-06	0.00234	0.0268	0.97085		9.69556	3.83269e-06	7.76957e-08	4.47463e-07	2.49473e-08	4.16437e-05	0.00049551	0.000155904	0.00326	0.99604
		9.70796	8.35082e-06	0.00219	0.03931	0.95849		9.70796	0.000179794	5.1359e-06	1.51059e-06	2.85607e-06	0.000352092	0.00419	0.00132	0.02755	0.9664							9.70796	8.4083e-06	0.00234	0.02679	0.97086		9.70796	3.81617e-06	7.74052e-08	4.45824e-07	2.48687e-08	4.15741e-05	0.000494684	0.000155712	0.00325	0.99605
		9.72036	8.33553e-06	0.00219	0.0393	0.95851		9.72036	0.000179001	5.11608e-06	1.50482e-06	2.84656e-06	0.000351454	0.00418	0.00132	0.02752	0.96644							9.72036	8.39385e-06	0.00233	0.02678	0.97087		9.72036	3.79979e-06	7.71174e-08	4.44191e-07	2.47903e-08	4.15043e-05	0.000493869	0.000155529	0.00325	0.99605
		9.73276	8.32059e-06	0.00219	0.03928	0.95852		9.73276	0.000178205	5.09618e-06	1.49906e-06	2.83717e-06	0.00035081	0.00417	0.00132	0.02749	0.96648							9.73276	8.37973e-06	0.00233	0.02677	0.97088		9.73276	3.78355e-06	7.68304e-08	4.42562e-07	2.47126e-08	4.14342e-05	0.000493059	0.000155352	0.00325	0.99606
		9.74516	8.30659e-06	0.00218	0.03927	0.95854		9.74516	0.000177414	5.07658e-06	1.49344e-06	2.8278e-06	0.000350172	0.00417	0.00131	0.02746	0.96652							9.74516	8.36581e-06	0.00233	0.02677	0.97089		9.74516	3.76743e-06	7.6546e-08	4.40949e-07	2.46355e-08	4.13658e-05	0.000492241	0.000155177	0.00325	0.99606
		9.75756	8.29167e-06	0.00218	0.03925	0.95856		9.75756	0.000176654	5.05748e-06	1.48785e-06	2.81875e-06	0.000349571	0.00416	0.00131	0.02743	0.96656							9.75756	8.35088e-06	0.00233	0.02676	0.9709		9.75756	3.75135e-06	7.62623e-08	4.39349e-07	2.45584e-08	4.12968e-05	0.000491432	0.000154999	0.00324	0.99607
		9.76995	8.27655e-06	0.00218	0.03923	0.95858		9.76995	0.000175875	5.03808e-06	1.48229e-06	2.80953e-06	0.000348943	0.00415	0.00131	0.0274	0.9666							9.76995	8.33692e-06	0.00233	0.02675	0.97091		9.76995	3.73541e-06	7.59812e-08	4.37751e-07	2.44821e-08	4.12289e-05	0.000490641	0.000154819	0.00324	0.99607
		9.78235	8.26235e-06	0.00218	0.03922	0.95859		9.78235	0.000175097	5.01861e-06	1.47668e-06	2.80016e-06	0.000348301	0.00414	0.00131	0.02737	0.96664							9.78235	8.32259e-06	0.00233	0.02674	0.97092		9.78235	3.71961e-06	7.57018e-08	4.36175e-07	2.44061e-08	4.1161e-05	0.000489841	0.000154642	0.00324	0.99607
		9.79475	8.24798e-06	0.00218	0.0392	0.95861		9.79475	0.000174337	4.99947e-06	1.47109e-06	2.79109e-06	0.000347677	0.00414	0.00131	0.02734	0.96668							9.79475	8.30806e-06	0.00233	0.02673	0.97093		9.79475	3.70388e-06	7.54235e-08	4.34601e-07	2.43308e-08	4.10921e-05	0.00048904	0.000154464	0.00323	0.99608
		9.80715	8.23333e-06	0.00218	0.03918	0.95863		9.80715	0.000173573	4.98044e-06	1.46557e-06	2.78199e-06	0.000347057	0.00413	0.0013	0.02731	0.96672							9.80715	8.29446e-06	0.00233	0.02672	0.97094		9.80715	3.6881e-06	7.51449e-08	4.33017e-07	2.42554e-08	4.10237e-05	0.000488224	0.000154279	0.00323	0.99608
		9.81955	8.21918e-06	0.00218	0.03917	0.95865		9.81955	0.000172823	4.9616e-06	1.46013e-06	2.77297e-06	0.000346444	0.00412	0.0013	0.02728	0.96676							9.81955	8.28001e-06	0.00233	0.02671	0.97095		9.81955	3.67282e-06	7.48747e-08	4.31488e-07	2.41821e-08	4.09584e-05	0.000487461	0.00015411	0.00323	0.99609
		9.83195	8.20478e-06	0.00218	0.03915	0.95866		9.83195	0.000172079	4.94308e-06	1.45476e-06	2.76413e-06	0.000345844	0.00412	0.0013	0.02725	0.9668							9.83195	8.26659e-06	0.00232	0.0267	0.97096		9.83195	3.65727e-06	7.45995e-08	4.2993e-07	2.41065e-08	4.08905e-05	0.000486663	0.000153929	0.00322	0.99609
		9.84434	8.19038e-06	0.00218	0.03914	0.95868		9.84434	0.000171337	4.92459e-06	1.44945e-06	2.75525e-06	0.000345241	0.00411	0.0013	0.02722	0.96684							9.84434	8.25236e-06	0.00232	0.02669	0.97097		9.84434	3.64201e-06	7.43286e-08	4.28394e-07	2.40329e-08	4.08231e-05	0.000485877	0.00015376	0.00322	0.9961
		9.85674	8.17637e-06	0.00217	0.03912	0.9587		9.85674	0.000170594	4.90582e-06	1.44402e-06	2.7463e-06	0.000344618	0.0041	0.0013	0.02719	0.96688							9.85674	8.23851e-06	0.00232	0.02669	0.97098		9.85674	3.62697e-06	7.40639e-08	4.2689e-07	2.39612e-08	4.07589e-05	0.000485121	0.000153592	0.00322	0.9961
		9.86914	8.16227e-06	0.00217	0.0391	0.95871		9.86914	0.000169868	4.88758e-06	1.43877e-06	2.73764e-06	0.000344026	0.00409	0.0013	0.02717	0.96692							9.86914	8.22505e-06	0.00232	0.02668	0.97099		9.86914	3.61173e-06	7.37927e-08	4.25358e-07	2.38868e-08	4.0691e-05	0.000484322	0.00015341	0.00321	0.9961
		9.88154	8.14809e-06	0.00217	0.03909	0.95873		9.88154	0.000169144	4.86942e-06	1.43349e-06	2.72887e-06	0.000343431	0.00409	0.0013	0.02714	0.96696							9.88154	8.21098e-06	0.00232	0.02667	0.971		9.88154	3.59699e-06	7.35309e-08	4.23878e-07	2.38154e-08	4.06272e-05	0.00048357	0.000153248	0.00321	0.99611
		9.89394	8.13441e-06	0.00217	0.03907	0.95875		9.89394	0.000168411	4.85099e-06	1.42818e-06	2.72005e-06	0.000342811	0.00408	0.00129	0.02711	0.967							9.89394	8.1973e-06	0.00232	0.02666	0.97101		9.89394	3.58205e-06	7.32664e-08	4.22377e-07	2.37433e-08	4.05618e-05	0.000482805	0.000153072	0.00321	0.99611
		9.90634	8.12023e-06	0.00217	0.03906	0.95877		9.90634	0.0001677	4.83315e-06	1.42297e-06	2.71148e-06	0.000342227	0.00407	0.00129	0.02708	0.96704							9.90634	8.18411e-06	0.00232	0.02665	0.97102		9.90634	3.56718e-06	7.30021e-08	4.20883e-07	2.36714e-08	4.04959e-05	0.000482029	0.0001529	0.00321	0.99612
		9.91874	8.10602e-06	0.00217	0.03904	0.95878		9.91874	0.000166989	4.81524e-06	1.41781e-06	2.7029e-06	0.000341634	0.00407	0.00129	0.02705	0.96708							9.91874	8.17027e-06	0.00232	0.02664	0.97103		9.91874	3.55273e-06	7.27469e-08	4.19421e-07	2.36009e-08	4.04325e-05	0.000481288	0.000152735	0.0032	0.99612

## Sheet: Figure 8 RRKM Cations
		CCSD(T)/TZ//B3LYP-D3																									CCSD(T)/TZ//wB97XD
		Partial Rate Constants (1/s) x = 3					Partial Rate Constants (1/s) x = 4						Partial Rate Constants (1/s) x = 5							Total Rate Constant (1/s)							Partial Rate Constants (1/s) x = 3					Partial Rate Constants (1/s) x = 4						Partial Rate Constants (1/s) x = 5							Total Rate Constant (1/s)
		E (eV)	n=1	n=2	n=3		E (eV)	n=1	n=2	n=3	n=4		E (eV)	n=1	n=2	n=3	n=4	n=5		E (eV)	x=3	x=4	x=5				E (eV)	n=1	n=2	n=3		E (eV)	n=1	n=2	n=3	n=4		E (eV)	n=1	n=2	n=3	n=4	n=5		E (eV)	x=3	x=4	x=5
		0.0124	0	0	0		0.0124	0	0	0	0		0.0124	0	0	0	0	0		0.0124	0	0	0				0.0124	0	0	0		0.0124	0	0	0	0		0.0124	0	0	0	0	0		0.0124	0	0	0
		0.0248	0	0	0		0.0248	0	0	0	0		0.0248	0	0	0	0	0		0.0248	0	0	0				0.0248	0	0	0		0.0248	0	0	0	0		0.0248	0	0	0	0	0		0.0248	0	0	0
		0.0372	0	0	0		0.0372	0	0	0	0		0.0372	0	0	0	0	0		0.0372	0	0	0				0.0372	0	0	0		0.0372	0	0	0	0		0.0372	0	0	0	0	0		0.0372	0	0	0
		0.04959	0	0	0		0.04959	0	0	0	0		0.04959	0	0	0	0	0		0.04959	0	0	0				0.04959	0	0	0		0.04959	0	0	0	0		0.04959	0	0	0	0	0		0.04959	0	0	0
		0.06199	0	0	0		0.06199	0	0	0	0		0.06199	0	0	0	0	0		0.06199	0	0	0				0.06199	0	0	0		0.06199	0	0	0	0		0.06199	0	0	0	0	0		0.06199	0	0	0
		0.07439	0	0	0		0.07439	0	0	0	0		0.07439	0	0	0	0	0		0.07439	0	0	0				0.07439	0	0	0		0.07439	0	0	0	0		0.07439	0	0	0	0	0		0.07439	0	0	0
		0.08679	0	0	0		0.08679	0	0	0	0		0.08679	0	0	0	0	0		0.08679	0	0	0				0.08679	0	0	0		0.08679	0	0	0	0		0.08679	0	0	0	0	0		0.08679	0	0	0
		0.09919	0	0	0		0.09919	0	0	0	0		0.09919	0	0	0	0	0		0.09919	0	0	0				0.09919	0	0	0		0.09919	0	0	0	0		0.09919	0	0	0	0	0		0.09919	0	0	0
		0.11159	0	0	0		0.11159	0	0	0	0		0.11159	0	0	0	0	0		0.11159	0	0	0				0.11159	0	0	0		0.11159	0	0	0	0		0.11159	0	0	0	0	0		0.11159	0	0	0
		0.12398	0	0	0		0.12398	0	0	0	0		0.12398	0	0	0	0	0		0.12398	0	0	0				0.12398	0	0	0		0.12398	0	0	0	0		0.12398	0	0	0	0	0		0.12398	0	0	0
		0.13638	0	0	0		0.13638	0	0	0	0		0.13638	0	0	0	0	0		0.13638	0	0	0				0.13638	0	0	0		0.13638	0	0	0	0		0.13638	0	0	0	0	0		0.13638	0	0	0
		0.14878	0	0	0		0.14878	0	0	0	0		0.14878	0	0	0	0	0		0.14878	0	0	0				0.14878	0	0	0		0.14878	0	0	0	0		0.14878	0	0	0	0	0		0.14878	0	0	0
		0.16118	0	0	0		0.16118	0	0	0	0		0.16118	0	0	0	0	0		0.16118	0	0	0				0.16118	0	0	0		0.16118	0	0	0	0		0.16118	0	0	0	0	0		0.16118	0	0	0
		0.17358	0	0	0		0.17358	0	0	0	0		0.17358	0	0	0	0	0		0.17358	0	0	0				0.17358	0	0	0		0.17358	0	0	0	0		0.17358	0	0	0	0	0		0.17358	0	0	0
		0.18598	0	0	0		0.18598	0	0	0	0		0.18598	0	0	0	0	0		0.18598	0	0	0				0.18598	0	0	0		0.18598	0	0	0	0		0.18598	0	0	0	0	0		0.18598	0	0	0
		0.19837	0	0	0		0.19837	0	0	0	0		0.19837	0	0	0	0	0		0.19837	0	0	0				0.19837	0	0	0		0.19837	0	0	0	0		0.19837	0	0	0	0	0		0.19837	0	0	0
		0.21077	0	0	0		0.21077	0	0	0	0		0.21077	0	0	0	0	0		0.21077	0	0	0				0.21077	0	0	0		0.21077	0	0	0	0		0.21077	0	0	0	0	0		0.21077	0	0	0
		0.22317	0	0	0		0.22317	0	0	0	0		0.22317	0	0	0	0	0		0.22317	0	0	0				0.22317	0	0	0		0.22317	0	0	0	0		0.22317	0	0	0	0	0		0.22317	0	0	0
		0.23557	0	0	0		0.23557	0	0	0	0		0.23557	0	0	0	0	0		0.23557	0	0	0				0.23557	0	0	0		0.23557	0	0	0	0		0.23557	0	0	0	0	0		0.23557	0	0	0
		0.24797	0	0	0		0.24797	0	0	0	0		0.24797	0	0	0	0	0		0.24797	0	0	0				0.24797	0	0	0		0.24797	0	0	0	0		0.24797	0	0	0	0	0		0.24797	0	0	0
		0.26037	0	0	0		0.26037	0	0	0	0		0.26037	0	0	0	0	0		0.26037	0	0	0				0.26037	0	0	0		0.26037	0	0	0	0		0.26037	0	0	0	0	0		0.26037	0	0	0
		0.27277	0	0	0		0.27277	0	0	0	0		0.27277	0	0	0	0	0		0.27277	0	0	0				0.27277	0	0	0		0.27277	0	0	0	0		0.27277	0	0	0	0	0		0.27277	0	0	0
		0.28516	0	0	0		0.28516	0	0	0	0		0.28516	0	0	0	0	0		0.28516	0	0	0				0.28516	0	0	0		0.28516	0	0	0	0		0.28516	0	0	0	0	0		0.28516	0	0	0
		0.29756	0	0	0		0.29756	0	0	0	0		0.29756	0	0	0	0	0		0.29756	0	0	0				0.29756	0	0	0		0.29756	0	0	0	0		0.29756	0	0	0	0	0		0.29756	0	0	0
		0.30996	0	0	0		0.30996	0	0	0	0		0.30996	0	0	0	0	0		0.30996	0	0	0				0.30996	0	0	0		0.30996	0	0	0	0		0.30996	0	0	0	0	0		0.30996	0	0	0
		0.32236	0	0	0		0.32236	0	0	0	0		0.32236	0	0	0	0	0		0.32236	0	0	0				0.32236	0	0	0		0.32236	0	0	0	0		0.32236	0	0	0	0	0		0.32236	0	0	0
		0.33476	0	0	0		0.33476	0	0	0	0		0.33476	0	0	0	0	0		0.33476	0	0	0				0.33476	0	0	0		0.33476	0	0	0	0		0.33476	0	0	0	0	0		0.33476	0	0	0
		0.34716	0	0	0		0.34716	0	0	0	0		0.34716	0	0	0	0	0		0.34716	0	0	0				0.34716	0	0	0		0.34716	0	0	0	0		0.34716	0	0	0	0	0		0.34716	0	0	0
		0.35955	0	0	0		0.35955	0	0	0	0		0.35955	0	0	0	0	0		0.35955	0	0	0				0.35955	0	0	0		0.35955	0	0	0	0		0.35955	0	0	0	0	0		0.35955	0	0	0
		0.37195	0	0	0		0.37195	0	0	0	0		0.37195	0	0	0	0	0		0.37195	0	0	0				0.37195	0	0	0		0.37195	0	0	0	0		0.37195	0	0	0	0	0		0.37195	0	0	0
		0.38435	0	0	0		0.38435	0	0	0	0		0.38435	0	0	0	0	0		0.38435	0	0	0				0.38435	0	0	0		0.38435	0	0	0	0		0.38435	0	0	0	0	0		0.38435	0	0	0
		0.39675	0	0	0		0.39675	0	0	0	0		0.39675	0	0	0	0	0		0.39675	0	0	0				0.39675	0	0	0		0.39675	0	0	0	0		0.39675	0	0	0	0	0		0.39675	0	0	0
		0.40915	0	0	0		0.40915	0	0	0	0		0.40915	0	0	0	0	0		0.40915	0	0	0				0.40915	0	0	0		0.40915	0	0	0	0		0.40915	0	0	0	0	0		0.40915	0	0	0
		0.42155	0	0	0		0.42155	0	0	0	0		0.42155	0	0	0	0	0		0.42155	0	0	0				0.42155	0	0	0		0.42155	0	0	0	0		0.42155	0	0	0	0	0		0.42155	0	0	0
		0.43394	0	0	0		0.43394	0	0	0	0		0.43394	0	0	0	0	0		0.43394	0	0	0				0.43394	0	0	0		0.43394	0	0	0	0		0.43394	0	0	0	0	0		0.43394	0	0	0
		0.44634	0	0	0		0.44634	0	0	0	0		0.44634	0	0	0	0	0		0.44634	0	0	0				0.44634	0	0	0		0.44634	0	0	0	0		0.44634	0	0	0	0	0		0.44634	0	0	0
		0.45874	0	0	0		0.45874	0	0	0	0		0.45874	0	0	0	0	0		0.45874	0	0	0				0.45874	0	0	0		0.45874	0	0	0	0		0.45874	0	0	0	0	0		0.45874	0	0	0
		0.47114	0	0	0		0.47114	0	0	0	0		0.47114	0	0	0	0	0		0.47114	0	0	0				0.47114	0	0	0		0.47114	0	0	0	0		0.47114	0	0	0	0	0		0.47114	0	0	0
		0.48354	0	0	0		0.48354	0	0	0	0		0.48354	0	0	0	0	0		0.48354	0	0	0				0.48354	0	0	0		0.48354	0	0	0	0		0.48354	0	0	0	0	0		0.48354	0	0	0
		0.49594	0	0	0		0.49594	0	0	0	0		0.49594	0	0	0	0	0		0.49594	0	0	0				0.49594	0	0	0		0.49594	0	0	0	0		0.49594	0	0	0	0	0		0.49594	0	0	0
		0.50834	0	0	0		0.50834	0	0	0	0		0.50834	0	0	0	0	0		0.50834	0	0	0				0.50834	0	0	0		0.50834	0	0	0	0		0.50834	0	0	0	0	0		0.50834	0	0	0
		0.52073	0	0	0		0.52073	0	0	0	0		0.52073	0	0	0	0	0		0.52073	0	0	0				0.52073	0	0	0		0.52073	0	0	0	0		0.52073	0	0	0	0	0		0.52073	0	0	0
		0.53313	0	0	0		0.53313	0	0	0	0		0.53313	0	0	0	0	0		0.53313	0	0	0				0.53313	0	0	0		0.53313	0	0	0	0		0.53313	0	0	0	0	0		0.53313	0	0	0
		0.54553	0	0	0		0.54553	0	0	0	0		0.54553	0	0	0	0	0		0.54553	0	0	0				0.54553	0	0	0		0.54553	0	0	0	0		0.54553	0	0	0	0	0		0.54553	0	0	0
		0.55793	0	0	0		0.55793	0	0	0	0		0.55793	0	0	0	0	0		0.55793	0	0	0				0.55793	0	0	0		0.55793	0	0	0	0		0.55793	0	0	0	0	0		0.55793	0	0	0
		0.57033	0	0	0		0.57033	0	0	0	0		0.57033	0	0	0	0	0		0.57033	0	0	0				0.57033	0	0	0		0.57033	0	0	0	0		0.57033	0	0	0	0	0		0.57033	0	0	0
		0.58273	0	0	0		0.58273	0	0	0	0		0.58273	0	0	0	0	0		0.58273	0	0	0				0.58273	0	0	0		0.58273	0	0	0	0		0.58273	0	0	0	0	0		0.58273	0	0	0
		0.59512	0	0	0		0.59512	0	0	0	0		0.59512	0	0	0	0	0		0.59512	0	0	0				0.59512	0	0	0		0.59512	0	0	0	0		0.59512	0	0	0	0	0		0.59512	0	0	0
		0.60752	0	0	0		0.60752	0	0	0	0		0.60752	0	0	0	0	0		0.60752	0	0	0				0.60752	0	0	0		0.60752	0	0	0	0		0.60752	0	0	0	0	0		0.60752	0	0	0
		0.61992	0	0	0		0.61992	0	0	0	0		0.61992	0	0	0	0	0		0.61992	0	0	0				0.61992	0	0	0		0.61992	0	0	0	0		0.61992	0	0	0	0	0		0.61992	0	0	0
		0.63232	0	0	0		0.63232	0	0	0	0		0.63232	0	0	0	0	0		0.63232	0	0	0				0.63232	0	0	0		0.63232	0	0	0	0		0.63232	0	0	0	0	0		0.63232	0	0	0
		0.64472	0	0	0		0.64472	0	0	0	0		0.64472	0	0	0	0	0		0.64472	0	0	0				0.64472	0	0	0		0.64472	0	0	0	0		0.64472	0	0	0	0	0		0.64472	0	0	0
		0.65712	0	0	0		0.65712	0	0	0	0		0.65712	0	0	0	0	0		0.65712	0	0	0				0.65712	0	0	0		0.65712	0	0	0	0		0.65712	0	0	0	0	0		0.65712	0	0	0
		0.66951	0	0	0		0.66951	0	0	0	0		0.66951	0	0	0	0	0		0.66951	0	0	0				0.66951	0	0	0		0.66951	0	0	0	0		0.66951	0	0	0	0	0		0.66951	0	0	0
		0.68191	0	0	0		0.68191	0	0	0	0		0.68191	0	0	0	0	0		0.68191	0	0	0				0.68191	0	0	0		0.68191	0	0	0	0		0.68191	0	0	0	0	0		0.68191	0	0	0
		0.69431	0	0	0		0.69431	0	0	0	0		0.69431	0	0	0	0	0		0.69431	0	0	0				0.69431	0	0	0		0.69431	0	0	0	0		0.69431	0	0	0	0	0		0.69431	0	0	0
		0.70671	0	0	0		0.70671	0	0	0	0		0.70671	0	0	0	0	0		0.70671	0	0	0				0.70671	0	0	0		0.70671	0	0	0	0		0.70671	0	0	0	0	0		0.70671	0	0	0
		0.71911	0	0	0		0.71911	0	0	0	0		0.71911	0	0	0	0	0		0.71911	0	0	0				0.71911	0	0	0		0.71911	0	0	0	0		0.71911	0	0	0	0	0		0.71911	0	0	0
		0.73151	0	0	0		0.73151	0	0	0	0		0.73151	0	0	0	0	0		0.73151	0	0	0				0.73151	0	0	0		0.73151	0	0	0	0		0.73151	0	0	0	0	0		0.73151	0	0	0
		0.74391	0	0	0		0.74391	0	0	0	0		0.74391	0	0	0	0	0		0.74391	0	0	0				0.74391	0	0	0		0.74391	0	0	0	0		0.74391	0	0	0	0	0		0.74391	0	0	0
		0.7563	0	0	0		0.7563	0	0	0	0		0.7563	0	0	0	0	0		0.7563	0	0	0				0.7563	0	0	0		0.7563	0	0	0	0		0.7563	0	0	0	0	0		0.7563	0	0	0
		0.7687	0	0	0		0.7687	0	0	0	0		0.7687	0	0	0	0	0		0.7687	0	0	0				0.7687	0	0	0		0.7687	0	0	0	0		0.7687	0	0	0	0	0		0.7687	0	0	0
		0.7811	0	0	0		0.7811	0	0	0	0		0.7811	0	0	0	0	0		0.7811	0	0	0				0.7811	0	0	0		0.7811	0	0	0	0		0.7811	0	0	0	0	0		0.7811	0	0	0
		0.7935	0	0	0		0.7935	0	0	0	0		0.7935	0	0	0	0	0		0.7935	0	0	0				0.7935	0	0	0		0.7935	0	0	0	0		0.7935	0	0	0	0	0		0.7935	0	0	0
		0.8059	0	0	0		0.8059	0	0	0	0		0.8059	0	0	0	0	0		0.8059	0	0	0				0.8059	0	0	0		0.8059	0	0	0	0		0.8059	0	0	0	0	0		0.8059	0	0	0
		0.8183	0	0	0		0.8183	0	0	0	0		0.8183	0	0	0	0	0		0.8183	0	0	0				0.8183	0	0	0		0.8183	0	0	0	0		0.8183	0	0	0	0	0		0.8183	0	0	0
		0.83069	0	0	0		0.83069	0	0	0	0		0.83069	0	0	0	0	0		0.83069	0	0	0				0.83069	0	0	0		0.83069	0	0	0	0		0.83069	0	0	0	0	0		0.83069	0	0	0
		0.84309	0	0	0		0.84309	0	0	0	0		0.84309	0	0	0	0	0		0.84309	0	0	0				0.84309	0	0	0		0.84309	0	0	0	0		0.84309	0	0	0	0	0		0.84309	0	0	0
		0.85549	0	0	0		0.85549	0	0	0	0		0.85549	0	0	0	0	0		0.85549	0	0	0				0.85549	0	0	0		0.85549	0	0	0	0		0.85549	0	0	0	0	0		0.85549	0	0	0
		0.86789	0	0	0		0.86789	0	0	0	0		0.86789	0	0	0	0	0		0.86789	0	0	0				0.86789	0	0	0		0.86789	0	0	0	0		0.86789	0	0	0	0	0		0.86789	0	0	0
		0.88029	0	0	0		0.88029	0	0	0	0		0.88029	0	0	0	0	0		0.88029	0	0	0				0.88029	0	0	0		0.88029	0	0	0	0		0.88029	0	0	0	0	0		0.88029	0	0	0
		0.89269	0	0	0		0.89269	0	0	0	0		0.89269	0	0	0	0	0		0.89269	0	0	0				0.89269	0	0	0		0.89269	0	0	0	0		0.89269	0	0	0	0	0		0.89269	0	0	0
		0.90508	0	0	0		0.90508	0	0	0	0		0.90508	0	0	0	0	0		0.90508	0	0	0				0.90508	0	0	0		0.90508	0	0	0	0		0.90508	0	0	0	0	0		0.90508	0	0	0
		0.91748	0	0	0		0.91748	0	0	0	0		0.91748	0	0	0	0	0		0.91748	0	0	0				0.91748	0	0	0		0.91748	0	0	0	0		0.91748	0	0	0	0	0		0.91748	0	0	0
		0.92988	0	0	0		0.92988	0	0	0	0		0.92988	0	0	0	0	0		0.92988	0	0	0				0.92988	0	0	0		0.92988	0	0	0	0		0.92988	0	0	0	0	0		0.92988	0	0	0
		0.94228	0	0	0		0.94228	0	0	0	0		0.94228	0	0	0	0	0		0.94228	0	0	0				0.94228	0	0	0		0.94228	0	0	0	0		0.94228	0	0	0	0	0		0.94228	0	0	0
		0.95468	0	0	0		0.95468	0	0	0	0		0.95468	0	0	0	0	0		0.95468	0	0	0				0.95468	0	0	0		0.95468	0	0	0	0		0.95468	0	0	0	0	0		0.95468	0	0	0
		0.96708	0	0	0		0.96708	0	0	0	0		0.96708	0	0	0	0	0		0.96708	0	0	0				0.96708	0	0	0		0.96708	0	0	0	0		0.96708	0	0	0	0	0		0.96708	0	0	0
		0.97948	0	0	0		0.97948	0	0	0	0		0.97948	0	0	0	0	0		0.97948	0	0	0				0.97948	0	0	0		0.97948	0	0	0	0		0.97948	0	0	0	0	0		0.97948	0	0	0
		0.99187	0	0	0		0.99187	0	0	0	0		0.99187	0	0	0	0	0		0.99187	0	0	0				0.99187	0	0	0		0.99187	0	0	0	0		0.99187	0	0	0	0	0		0.99187	0	0	0
		1.00427	0	0	0		1.00427	0	0	0	0		1.00427	0	0	0	0	0		1.00427	0	0	0				1.00427	0	0	0		1.00427	0	0	0	0		1.00427	0	0	0	0	0		1.00427	0	0	0
		1.01667	0	0	0		1.01667	0	0	0	0		1.01667	0	0	0	0	0		1.01667	0	0	0				1.01667	0	0	0		1.01667	0	0	0	0		1.01667	0	0	0	0	0		1.01667	0	0	0
		1.02907	0	0	0		1.02907	0	0	0	0		1.02907	0	0	0	0	0		1.02907	0	0	0				1.02907	0	0	0		1.02907	0	0	0	0		1.02907	0	0	0	0	0		1.02907	0	0	0
		1.04147	0	0	0		1.04147	0	0	0	0		1.04147	0	0	0	0	0		1.04147	0	0	0				1.04147	0	0	0		1.04147	0	0	0	0		1.04147	0	0	0	0	0		1.04147	0	0	0
		1.05387	0	0	0		1.05387	0	0	0	0		1.05387	0	0	0	0	0		1.05387	0	0	0				1.05387	0	0	0		1.05387	0	0	0	0		1.05387	0	0	0	0	0		1.05387	0	0	0
		1.06626	0	0	0		1.06626	0	0	0	0		1.06626	0	0	0	0	0		1.06626	0	0	0				1.06626	0	0	0		1.06626	0	0	0	0		1.06626	0	0	0	0	0		1.06626	0	0	0
		1.07866	0	0	0		1.07866	0	0	0	0		1.07866	0	0	0	0	0		1.07866	0	0	0				1.07866	0	0	0		1.07866	0	0	0	0		1.07866	0	0	0	0	0		1.07866	0	0	0
		1.09106	0	0	0		1.09106	0	0	0	0		1.09106	0	0	0	0	0		1.09106	0	0	0				1.09106	0	0	0		1.09106	0	0	0	0		1.09106	0	0	0	0	0		1.09106	0	0	0
		1.10346	0	0	0		1.10346	0	0	0	0		1.10346	0	0	0	0	0		1.10346	0	0	0				1.10346	0	0	0		1.10346	0	0	0	0		1.10346	0	0	0	0	0		1.10346	0	0	0
		1.11586	0	0	0		1.11586	0	0	0	0		1.11586	0	0	0	0	0		1.11586	0	0	0				1.11586	0	0	0		1.11586	0	0	0	0		1.11586	0	0	0	0	0		1.11586	0	0	0
		1.12826	0	0	0		1.12826	0	0	0	0		1.12826	0	0	0	0	0		1.12826	0	0	0				1.12826	0	0	0		1.12826	0	0	0	0		1.12826	0	0	0	0	0		1.12826	0	0	0
		1.14065	0	0	0		1.14065	0	0	0	0		1.14065	0	0	0	0	0		1.14065	0	0	0				1.14065	0	0	0		1.14065	0	0	0	0		1.14065	0	0	0	0	0		1.14065	0	0	0
		1.15305	0	0	0		1.15305	0	0	0	0		1.15305	0	0	0	0	0		1.15305	0	0	0				1.15305	0	0	0		1.15305	0	0	0	0		1.15305	0	0	0	0	0		1.15305	0	0	0
		1.16545	0	0	0		1.16545	0	0	0	0		1.16545	0	0	0	0	0		1.16545	0	0	0				1.16545	0	0	0		1.16545	0	0	0	0		1.16545	0	0	0	0	0		1.16545	0	0	0
		1.17785	0	0	0		1.17785	0	0	0	0		1.17785	0	0	0	0	0		1.17785	0	0	0				1.17785	0	0	0		1.17785	0	0	0	0		1.17785	0	0	0	0	0		1.17785	0	0	0
		1.19025	0	0	0		1.19025	0	0	0	0		1.19025	0	0	0	0	0		1.19025	0	0	0				1.19025	0	0	0		1.19025	0	0	0	0		1.19025	0	0	0	0	0		1.19025	0	0	0
		1.20265	0	0	0		1.20265	0	0	0	0		1.20265	0	0	0	0	0		1.20265	0	0	0				1.20265	0	0	0		1.20265	0	0	0	0		1.20265	0	0	0	0	0		1.20265	0	0	0
		1.21505	0	0	0		1.21505	0	0	0	0		1.21505	0	0	0	0	0		1.21505	0	0	0				1.21505	0	0	0		1.21505	0	0	0	0		1.21505	0	0	0	0	0		1.21505	0	0	0
		1.22744	0	0	0		1.22744	0	0	0	0		1.22744	0	0	0	0	0		1.22744	0	0	0				1.22744	0	0	0		1.22744	0	0	0	0		1.22744	0	0	0	0	0		1.22744	0	0	0
		1.23984	0	0	0		1.23984	0	0	0	0		1.23984	0	0	0	0	0		1.23984	0	0	0				1.23984	0	0	0		1.23984	0	0	0	0		1.23984	0	0	0	0	0		1.23984	0	0	0
		1.25224	0	0	0		1.25224	0	0	0	0		1.25224	0	0	0	0	0		1.25224	0	0	0				1.25224	0	0	0		1.25224	0	0	0	0		1.25224	0	0	0	0	0		1.25224	0	0	0
		1.26464	0	0	0		1.26464	0	0	0	0		1.26464	0	0	0	0	0		1.26464	0	0	0				1.26464	0	0	0		1.26464	0	0	0	0		1.26464	0	0	0	0	0		1.26464	0	0	0
		1.27704	0	0	0		1.27704	0	0	0	0		1.27704	0	0	0	0	0		1.27704	0	0	0				1.27704	0	0	0		1.27704	0	0	0	0		1.27704	0	0	0	0	0		1.27704	0	0	0
		1.28944	0	0	0		1.28944	0	0	0	0		1.28944	0	0	0	0	0		1.28944	0	0	0				1.28944	0	0	0		1.28944	0	0	0	0		1.28944	0	0	0	0	0		1.28944	0	0	0
		1.30183	0	0	0		1.30183	0	0	0	0		1.30183	0	0	0	0	0		1.30183	0	0	0				1.30183	0	0	0		1.30183	0	0	0	0		1.30183	0	0	0	0	0		1.30183	0	0	0
		1.31423	0	0	0		1.31423	0	0	0	0		1.31423	0	0	0	0	0		1.31423	0	0	0				1.31423	0	0	0		1.31423	0	0	0	0		1.31423	0	0	0	0	0		1.31423	0	0	0
		1.32663	0	0	0		1.32663	0	0	0	0		1.32663	0	0	0	0	0		1.32663	0	0	0				1.32663	0	0	0		1.32663	0	0	0	0		1.32663	0	0	0	0	0		1.32663	0	0	0
		1.33903	0	0	0		1.33903	0	0	0	0		1.33903	0	0	0	0	0		1.33903	0	0	0				1.33903	0	0	0		1.33903	0	0	0	0		1.33903	0	0	0	0	0		1.33903	0	0	0
		1.35143	0	0	0		1.35143	0	0	0	0		1.35143	0	0	0	0	0		1.35143	0	0	0				1.35143	0	0	0		1.35143	0	0	0	0		1.35143	0	0	0	0	0		1.35143	0	0	0
		1.36383	0	0	0		1.36383	0	0	0	0		1.36383	0	0	0	0	0		1.36383	0	0	0				1.36383	0	0	0		1.36383	0	0	0	0		1.36383	0	0	0	0	0		1.36383	0	0	0
		1.37622	0	0	0		1.37622	0	0	0	0		1.37622	0	0	0	0	0		1.37622	0	0	0				1.37622	0	0	0		1.37622	0	0	0	0		1.37622	0	0	0	0	0		1.37622	0	0	0
		1.38862	0	0	0		1.38862	0	0	0	0		1.38862	0	0	0	0	0		1.38862	0	0	0				1.38862	0	0	0		1.38862	0	0	0	0		1.38862	0	0	0	0	0		1.38862	0	0	0
		1.40102	0	0	0		1.40102	0	0	0	0		1.40102	0	0	0	0	0		1.40102	0	0	0				1.40102	0	0	0		1.40102	0	0	0	0		1.40102	0	0	0	0	0		1.40102	0	0	0
		1.41342	0	0	0		1.41342	0	0	0	0		1.41342	0	0	0	0	0		1.41342	0	0	0				1.41342	0	0	0		1.41342	0	0	0	0		1.41342	0	0	0	0	0		1.41342	0	0	0
		1.42582	0	0	0		1.42582	0	0	0	0		1.42582	0	0	0	0	0		1.42582	0	0	0				1.42582	0	0	0		1.42582	0	0	0	0		1.42582	0	0	0	0	0		1.42582	0	0	0
		1.43822	0	0	0		1.43822	0	0	0	0		1.43822	0	0	0	0	0		1.43822	0	0	0				1.43822	0	0	0		1.43822	0	0	0	0		1.43822	0	0	0	0	0		1.43822	0	0	0
		1.45062	0	0	0		1.45062	0	0	0	0		1.45062	0	0	0	0	0		1.45062	0	0	0				1.45062	0	0	0		1.45062	0	0	0	0		1.45062	0	0	0	0	0		1.45062	0	0	0
		1.46301	0	0	0		1.46301	0	0	0	0		1.46301	0	0	0	0	0		1.46301	0	0	0				1.46301	0	0	0		1.46301	0	0	0	0		1.46301	0	0	0	0	0		1.46301	0	0	0
		1.47541	0	0	0		1.47541	0	0	0	0		1.47541	0	0	0	0	0		1.47541	0	0	0				1.47541	0	0	0		1.47541	0	0	0	0		1.47541	0	0	0	0	0		1.47541	0	0	0
		1.48781	0	0	0		1.48781	0	0	0	0		1.48781	0	0	0	0	0		1.48781	0	0	0				1.48781	0	0	0		1.48781	0	0	0	0		1.48781	0	0	0	0	0		1.48781	0	0	0
		1.50021	0	0	0		1.50021	0	0	0	0		1.50021	0	0	0	0	0		1.50021	0	0	0				1.50021	0	0	0		1.50021	0	0	0	0		1.50021	0	0	0	0	0		1.50021	0	0	0
		1.51261	0	0	0		1.51261	0	0	0	0		1.51261	0	0	0	0	0		1.51261	0	0	0				1.51261	0	0	0		1.51261	0	0	0	0		1.51261	0	0	0	0	0		1.51261	0	0	0
		1.52501	0	0	0		1.52501	0	0	0	0		1.52501	0	0	0	0	0		1.52501	0	0	0				1.52501	0	0	0		1.52501	0	0	0	0		1.52501	0	0	0	0	0		1.52501	0	0	0
		1.5374	0	0	0		1.5374	0	0	0	0		1.5374	0	0	0	0	0		1.5374	0	0	0				1.5374	0	0	0		1.5374	0	0	0	0		1.5374	0	0	0	0	0		1.5374	0	0	0
		1.5498	0	0	0		1.5498	0	0	0	0		1.5498	0	0	0	0	0		1.5498	0	0	0				1.5498	0	0	0		1.5498	0	0	0	0		1.5498	0	0	0	0	0		1.5498	0	0	0
		1.5622	0	0	0		1.5622	0	0	0	0		1.5622	0	0	0	0	0		1.5622	0	0	0				1.5622	0	0	0		1.5622	0	0	0	0		1.5622	0	0	0	0	0		1.5622	0	0	0
		1.5746	0	0	0		1.5746	0	0	0	0		1.5746	0	0	0	0	0		1.5746	0	0	0				1.5746	0	0	0		1.5746	0	0	0	0		1.5746	0	0	0	0	0		1.5746	0	0	0
		1.587	0	0	0		1.587	0	0	0	0		1.587	0	0	0	7.54602e-12	0		1.587	0	0	7.54602e-12				1.587	0	0	0		1.587	0	0	0	0		1.587	0	0	0	0	0		1.587	0	0	0
		1.5994	0	0	0		1.5994	0	0	0	0		1.5994	0	0	0	4.59886e-10	0		1.5994	0	0	4.59886e-10				1.5994	0	0	0		1.5994	0	0	0	0		1.5994	0	0	0	0	0		1.5994	0	0	0
		1.61179	0	0	0		1.61179	0	0	0	0		1.61179	0	0	0	5.31478e-09	0		1.61179	0	0	5.31478e-09				1.61179	0	0	0		1.61179	0	0	0	0		1.61179	0	0	0	0	0		1.61179	0	0	0
		1.62419	0	0	0		1.62419	0	0	0	0		1.62419	0	0	0	3.7292e-08	0		1.62419	0	0	3.7292e-08				1.62419	0	0	0		1.62419	0	0	0	0		1.62419	0	0	0	0	0		1.62419	0	0	0
		1.63659	0	0	0		1.63659	0	0	0	0		1.63659	0	0	0	1.9462e-07	0		1.63659	0	0	1.9462e-07				1.63659	0	0	0		1.63659	0	0	0	0		1.63659	0	0	0	0	0		1.63659	0	0	0
		1.64899	0	0	0		1.64899	0	0	0	0		1.64899	0	0	0	8.30252e-07	0		1.64899	0	0	8.30252e-07				1.64899	0	0	0		1.64899	0	0	0	0		1.64899	0	0	0	2.56466e-11	0		1.64899	0	0	2.56466e-11
		1.66139	0	0	0		1.66139	0	0	0	0		1.66139	0	0	0	3.04456e-06	0		1.66139	0	0	3.04456e-06				1.66139	0	0	0		1.66139	0	0	0	0		1.66139	0	0	0	5.82582e-10	0		1.66139	0	0	5.82582e-10
		1.67379	0	0	0		1.67379	0	0	0	0		1.67379	0	0	0	9.90985e-06	0		1.67379	0	0	9.90985e-06				1.67379	0	0	0		1.67379	0	0	0	0		1.67379	0	0	0	4.65916e-09	0		1.67379	0	0	4.65916e-09
		1.68619	0	0	0		1.68619	0	0	0	0		1.68619	0	0	0	2.92616e-05	0		1.68619	0	0	2.92616e-05				1.68619	0	0	0		1.68619	0	0	0	0		1.68619	0	0	0	2.46422e-08	0		1.68619	0	0	2.46422e-08
		1.69858	0	0	0		1.69858	0	0	0	0		1.69858	0	0	0	7.9623e-05	0		1.69858	0	0	7.9623e-05				1.69858	0	0	0		1.69858	0	0	0	0		1.69858	0	0	0	1.01988e-07	0		1.69858	0	0	1.01988e-07
		1.71098	0	0	0		1.71098	0	0	0	0		1.71098	0	0	0	0.00020203	0		1.71098	0	0	0.00020203				1.71098	0	0	0		1.71098	0	0	0	0		1.71098	0	0	0	3.55544e-07	0		1.71098	0	0	3.55544e-07
		1.72338	0	0	0		1.72338	0	0	0	3.83658e-12		1.72338	0	0	0	0.000482434	0		1.72338	0	3.83658e-12	0.000482434				1.72338	0	0	0		1.72338	0	0	0	0		1.72338	0	0	0	1.08954e-06	0		1.72338	0	0	1.08954e-06
		1.73578	0	0	0		1.73578	0	0	0	6.57407e-11		1.73578	0	0	0	0.00109	0		1.73578	0	6.57407e-11	0.00109				1.73578	0	0	0		1.73578	0	0	0	0		1.73578	0	0	0	3.0146e-06	0		1.73578	0	0	3.0146e-06
		1.74818	0	0	0		1.74818	0	0	0	4.77396e-10		1.74818	0	0	0	0.00236	0		1.74818	0	4.77396e-10	0.00236				1.74818	0	0	0		1.74818	0	0	0	0		1.74818	0	0	0	7.67147e-06	0		1.74818	0	0	7.67147e-06
		1.76058	0	0	0		1.76058	0	0	0	2.41038e-09		1.76058	0	0	0	0.00488	0		1.76058	0	2.41038e-09	0.00488				1.76058	0	0	0		1.76058	0	0	0	0		1.76058	0	0	0	1.81966e-05	0		1.76058	0	0	1.81966e-05
		1.77297	0	0.000449293	0		1.77297	0	0	0	9.89789e-09		1.77297	0	0	0	0.00972	0		1.77297	0.000449293	9.89789e-09	0.00972				1.77297	0	0	0		1.77297	0	0	0	0		1.77297	0	0	0	4.06421e-05	0		1.77297	0	0	4.06421e-05
		1.78537	0	0.04709	0		1.78537	0	0	0	3.46507e-08		1.78537	0	0	0	0.0187	0		1.78537	0.04709	3.46507e-08	0.0187				1.78537	0	0.000976431	0		1.78537	0	0	0	3.08978e-11		1.78537	0	0	0	8.61479e-05	0		1.78537	0.000976431	3.08978e-11	8.61479e-05
		1.79777	0	0.43726	0		1.79777	0	0	0	1.0792e-07		1.79777	0	0	0	0.03484	0		1.79777	0.43726	1.0792e-07	0.03484				1.79777	0	0.03725	0		1.79777	0	0	0	2.71655e-10		1.79777	0	0	0	0.000174396	0		1.79777	0.03725	2.71655e-10	0.000174396
		1.81017	0	2.08201	0		1.81017	0	0	0	3.05043e-07		1.81017	0	1.6493e-12	0	0.06307	0		1.81017	2.08201	3.05043e-07	0.06307				1.81017	0	0.27923	0		1.81017	0	0	0	1.40085e-09		1.81017	0	5.28582e-11	0	0.000338911	0		1.81017	0.27923	1.40085e-09	0.000338911
		1.82257	0	7.30502	0		1.82257	0	0	0	7.95691e-07		1.82257	0	1.21466e-10	0	0.11113	0		1.82257	7.30502	7.95691e-07	0.11113				1.82257	0	1.22844	0		1.82257	0	0	0	5.68551e-09		1.82257	0	9.96611e-10	0	0.00063494	0		1.82257	1.22844	5.68551e-09	0.000634941
		1.83497	0	21.1366	0		1.83497	0	0	0	1.93767e-06		1.83497	0	1.421e-09	0	0.19104	0		1.83497	21.1366	1.93767e-06	0.19104				1.83497	0	4.13959	0		1.83497	0	0	0	1.93254e-08		1.83497	0	8.10708e-09	0	0.00115	0		1.83497	4.13959	1.93254e-08	0.00115
		1.84736	0	53.2599	0		1.84736	0	0	0	4.44775e-06		1.84736	0	9.70855e-09	0	0.32092	0		1.84736	53.2599	4.44775e-06	0.32092				1.84736	0	11.67	0		1.84736	0	0	0	5.79051e-08		1.84736	0	4.52122e-08	0	0.00202	0		1.84736	11.67	5.79051e-08	0.00202
		1.85976	0	120.923	0		1.85976	0	0	0	9.69942e-06		1.85976	0	4.92275e-08	0	0.52768	0		1.85976	120.923	9.69942e-06	0.52768				1.85976	0	28.908	0		1.85976	0	0	0	1.568e-07		1.85976	0	1.9837e-07	0	0.00347	0		1.85976	28.908	1.568e-07	0.00347
		1.87216	0	252.721	0		1.87216	0	0	0	2.02158e-05		1.87216	0	2.03824e-07	0	0.8505	0		1.87216	252.721	2.02158e-05	0.8505				1.87216	0	64.8556	0		1.87216	0	0	0	3.91454e-07		1.87216	0	7.33783e-07	0	0.00579	0		1.87216	64.8556	3.91454e-07	0.00579
		1.88456	0	493.644	0		1.88456	0	0	0	4.04662e-05		1.88456	0	7.26451e-07	0	1.34544	0		1.88456	493.644	4.04662e-05	1.34544				1.88456	0	134.392	0		1.88456	0	0	0	9.13175e-07		1.88456	0	2.38224e-06	0	0.00944	0		1.88456	134.392	9.13175e-07	0.00944
		1.89696	0	911.261	0		1.89696	0	0	0	7.81255e-05		1.89696	1.00982e-11	2.30188e-06	0	2.09144	0		1.89696	911.261	7.81255e-05	2.09144				1.89696	0	260.9	0		1.89696	0	0	0	2.01062e-06		1.89696	3.9707e-12	6.96819e-06	0	0.01507	0		1.89696	260.9	2.01062e-06	0.01508
		1.90936	0	1603.22	0		1.90936	0	0	0	0.000145977		1.90936	4.06169e-10	6.62887e-06	0	3.19787	0		1.90936	1603.22	0.000145977	3.19788				1.90936	0	479.441	0		1.90936	0	0	0	4.21177e-06		1.90936	1.61814e-10	1.87028e-05	0	0.0236	0		1.90936	479.441	4.21177e-06	0.02361
		1.92175	0	2705.64	0		1.92175	0	0	0	0.000264788		1.92175	5.45321e-09	1.7623e-05	0	4.81467	0		1.92175	2705.64	0.000264788	4.81468				1.92175	0	840.754	0		1.92175	0	0	0	8.44536e-06		1.92175	2.08962e-09	4.66812e-05	0	0.03627	0		1.92175	840.754	8.44536e-06	0.03632
		1.93415	0	4403.9	0		1.93415	0	0	0	0.000467453		1.93415	4.36852e-08	4.3764e-05	0	7.14325	0		1.93415	4403.9	0.000467453	7.14329				1.93415	0	1415.79	0		1.93415	0	0	0	1.62923e-05		1.93415	1.601e-08	0.000109471	0	0.05482	0		1.93415	1415.79	1.62923e-05	0.05493
		1.94655	0	6942.37	0		1.94655	0	0	0	0.000804939		1.94655	2.5511e-07	0.000102449	0	10.4527	0		1.94655	6942.37	0.000804939	10.4528				1.94655	0	2300.89	0		1.94655	6.21478e-13	0	0	3.0363e-05		1.94655	8.95424e-08	0.000243138	0	0.08153	0		1.94655	2300.89	3.0363e-05	0.08177
		1.95895	0	10637.7	0		1.95895	3.24359e-11	0	0	0.00135		1.95895	1.19583e-06	0.0002277	0	15.0969	0		1.95895	10637.7	0.00135	15.0972				1.95895	0	3623.97	0		1.95895	1.37496e-08	0	0	5.48526e-05		1.95895	4.02968e-07	0.000514758	0	0.11944	0		1.95895	3623.97	5.48663e-05	0.11996
		1.97135	0	15891.2	0		1.97135	3.84042e-09	0	0	0.00223		1.97135	4.75406e-06	0.000483327	0	21.5349	0		1.97135	15891.2	0.00223	21.5354				1.97135	0	5550.8	0		1.97135	1.75886e-07	0	0	9.63383e-05		1.97135	1.54203e-06	0.00104	0	0.17257	0		1.97135	5550.8	9.65142e-05	0.17361
		1.98375	0	23200.3	0		1.98375	4.1907e-08	0	0	0.00361		1.98375	1.66041e-05	0.000984548	0	30.3583	0		1.98375	23200.3	0.00361	30.3593				1.98375	0	8291.11	0		1.98375	1.17802e-06	0	0	0.000164906		1.98375	5.19624e-06	0.00204	0	0.24604	0		1.98375	8291.11	0.000166084	0.24808
		1.99615	0	33176	0		1.99615	2.64621e-07	0	0	0.00572		1.99615	5.2188e-05	0.00193	0	42.3219	0		1.99615	33176	0.00572	42.3239				1.99615	0	12107.8	0		1.99615	5.72086e-06	0	0	0.00027568		1.99615	1.57911e-05	0.00385	0	0.34646	0		1.99615	12107.8	0.000281401	0.35032
		2.00854	0	46554.7	0		2.00854	1.24004e-06	0	0	0.00892		2.00854	0.000150204	0.00367	0	58.3728	0		2.00854	46554.7	0.00892	58.3766				2.00854	0	17323.2	0		2.00854	2.247e-05	0	0	0.000450992		2.00854	4.40276e-05	0.00703	0	0.48219	0		2.00854	17323.2	0.000473462	0.48926
		2.02094	0	64210.5	0		2.02094	4.7579e-06	0	0	0.01369		2.02094	0.000401089	0.00675	0	79.6963	0		2.02094	64210.5	0.01369	79.7034				2.02094	0	24326.5	0		2.02094	7.57117e-05	0	0	0.000723088		2.02094	0.000114088	0.0125	0	0.66365	0		2.02094	24326.5	0.0007988	0.67626
		2.03334	0	87167.6	0		2.03334	1.57662e-05	0	0	0.0207		2.03334	0.001	0.01208	0	107.758	0		2.03334	87167.6	0.02071	107.771				2.03334	0	33583.3	0		2.03334	0.000226614	0	0	0.00114		2.03334	0.000277521	0.02163	0	0.90391	0		2.03334	33583.3	0.00136	0.92581
		2.04574	0	116622	0		2.04574	4.66137e-05	0	0	0.03085		2.04574	0.00237	0.02106	0	144.358	0		2.04574	116622	0.0309	144.382				2.04574	0	45638.9	0		2.04574	0.000616756	0	0	0.00176		2.04574	0.000638708	0.03653	0	1.21897	0		2.04574	45638.9	0.00238	1.25614
		2.05814	0	153946	0		2.05814	0.000125702	0	0	0.04539		2.05814	0.00534	0.03584	0	191.683	0		2.05814	153946	0.04552	191.724				2.05814	0	61133	0		2.05814	0.00155	0	0	0.00268		2.05814	0.0014	0.06035	0	1.62838	0		2.05814	61133	0.00423	1.69012
		2.07054	0	200683	0		2.07054	0.000314016	0	0	0.06595		2.07054	0.01147	0.05965	0	252.352	0		2.07054	200683	0.06627	252.423				2.07054	0	80802.3	0		2.07054	0.00365	0	9.55781e-10	0.00401		2.07054	0.00294	0.09764	0	2.15574	0		2.07054	80802.3	0.00766	2.25632
		2.08293	0	258601	0		2.08293	0.000735143	0	1.61754e-09	0.0947		2.08293	0.02368	0.09725	0	329.554	0		2.08293	258601	0.09544	329.675				2.08293	0	105487	0		2.08293	0.00811	0	9.5337e-08	0.00593		2.08293	0.00593	0.15496	0	2.82984	0		2.08293	105487	0.01404	2.99072
		2.09533	0	329663	0		2.09533	0.00163	0	6.11108e-08	0.13446		2.09533	0.04713	0.15551	0	427.005	0		2.09533	329663	0.13609	427.207				2.09533	0	136130	0		2.09533	0.01715	0	1.66955e-06	0.00864		2.09533	0.01154	0.24155	0	3.6847	0		2.09533	136130	0.02579	3.93779
		2.10773	0	416049	0		2.10773	0.00343	0	7.33579e-07	0.18891		2.10773	0.09073	0.24419	0	549.122	0		2.10773	416049	0.19235	549.457				2.10773	0	173808	0		2.10773	0.03469	0	1.44829e-05	0.01243		2.10773	0.02176	0.37022	0	4.76063	0		2.10773	173808	0.04713	5.1526
		2.12013	0	520148	0		2.12013	0.00693	0	5.12903e-06	0.26277		2.12013	0.16939	0.37697	0	701.106	0		2.12013	520148	0.2697	701.652				2.12013	0	219696	0		2.12013	0.06744	0	8.49005e-05	0.01767		2.12013	0.03983	0.55858	0	6.10544	0		2.12013	219696	0.0852	6.70385
		2.13253	0	644558	0		2.13253	0.01347	3.8051e-11	2.6025e-05	0.36201		2.13253	0.30748	0.57269	0	888.896	0		2.13253	644558	0.37551	889.776				2.13253	0	275121	0		2.13253	0.12655	0	0.00038583	0.02483		2.13253	0.07097	0.83042	0	7.77557	0		2.13253	275121	0.15177	8.67697
		2.14493	0	792171	1.4191e-07		2.14493	0.02529	3.07033e-09	0.000106365	0.49425		2.14493	0.54382	0.85695	0	1119.45	0		2.14493	792171	0.51965	1120.85				2.14493	0	341500	6.04574e-09		2.14493	0.22997	4.78563e-10	0.00146	0.0345		2.14493	0.12335	1.21741	0	9.83529	0		2.14493	341500	0.26593	11.1761
		2.15732	0	966039	3.76286e-06		2.15732	0.04603	2.58284e-08	0.000371048	0.66895		2.15732	0.93896	1.26416	0	1400.73	0		2.15732	966039	0.71535	1402.94				2.15732	0	420426	1.84314e-06		2.15732	0.40584	1.82889e-08	0.00482	0.04745		2.15732	0.2095	1.76153	0	12.3609	0		2.15732	420426	0.4581	14.332
		2.16972	0	1.16938e+06	2.93025e-05		2.16972	0.08144	1.40947e-07	0.00115	0.89794		2.16972	1.58524	1.83981	0	1741.79	0		2.16972	1.16938e+06	0.98052	1745.21				2.16972	0	513580	2.17611e-05		2.16972	0.6972	1.41192e-07	0.01423	0.06459		2.16972	0.34828	2.51739	0	15.4396	0		2.16972	513580	0.77602	18.3052
		2.18212	0	1.40584e+06	0.000141378		2.18212	0.14041	5.95594e-07	0.0032	1.19592		2.18212	2.6209	2.64358	0	2152.79	0		2.18212	1.40584e+06	1.33953	2158.06				2.18212	0	622804	0.000129198		2.18212	1.16849	1.17495e-06	0.0384	0.08706		2.18212	0.56755	3.55562	0	19.1707	0		2.18212	622804	1.29395	23.2939
		2.19452	0	1.67911e+06	0.000519302		2.19452	0.23639	2.11366e-06	0.00826	1.58071		2.19452	4.24973	3.75231	0	2645.4	0		2.19452	1.67911e+06	1.82536	2653.41				2.19452	0	750109	0.000549719		2.19452	1.91386	1.87434e-05	0.096	0.11627		2.19452	0.90785	4.96688	0	23.6694	0		2.19452	750109	2.12615	29.5441
		2.20692	0	1.99306e+06	0.00159		2.20692	0.38939	6.80508e-06	0.01988	2.0743		2.20692	6.76475	5.26467	0	3232.37	2.2148e-16		2.20692	1.99306e+06	2.48358	3244.4				2.20692	0	897480	0.00187		2.20692	3.06839	0.000205246	0.22492	0.15388		2.20692	1.42713	6.86526	0	29.064	0		2.20692	897480	3.44739	37.3564
		2.21932	1.15733e-05	2.35194e+06	0.00428		2.21932	0.62856	2.31691e-05	0.04513	2.70328		2.21932	10.5844	7.30538	0	3927.81	5.2901e-15		2.21932	2.35194e+06	3.37699	3945.7				2.21932	0	1.06725e+06	0.00546		2.21932	4.82223	0.00144	0.49795	0.20186		2.21932	2.20719	9.39519	0	35.5029	8.15038e-17		2.21932	1.06725e+06	5.52348	47.1053
		2.23172	8.93109e-05	2.76013e+06	0.01038		2.23172	0.99576	9.06287e-05	0.09732	3.49968		2.23172	16.2933	10.031	0	4747.88	5.46714e-14		2.23172	2.76013e+06	4.59286	4774.2				2.23172	8.97558e-07	1.2617e+06	0.01415		2.23172	7.43741	0.00746	1.04883	0.26255		2.23172	3.36156	12.7357	0	43.1476	4.19624e-15		2.23172	1.2617e+06	8.75625	59.2449
		2.24411	0.000435254	3.22205e+06	0.02318		2.24411	1.55011	0.000369796	0.2006	4.50199		2.24411	24.6994	13.6359	0	5709.69	3.74426e-13		2.24411	3.22205e+06	6.25308	5748.02				2.24411	2.49898e-05	1.48338e+06	0.03345		2.24411	11.2696	0.03108	2.11337	0.33867		2.24411	5.0465	17.1074	0	52.1886	5.23397e-14		2.24411	1.48338e+06	13.7527	74.3425
		2.25651	0.00157	3.74252e+06	0.04838		2.25651	2.37404	0.00142	0.39724	5.75615		2.25651	36.9011	18.3582	0	6831.9	1.97264e-12		2.25651	3.74252e+06	8.52885	6887.16				2.25651	0.000145565	1.73479e+06	0.07329		2.25651	16.7939	0.11008	4.09228	0.43332		2.25651	7.47355	22.7842	0	62.8295	3.9172e-13		2.25651	1.73479e+06	21.4296	93.0872
		2.26891	0.00471	4.32649e+06	0.09538		2.26891	3.58074	0.0049	0.75887	7.31638		2.26891	54.3767	24.4882	0	8135.19	8.6155e-12		2.26891	4.32649e+06	11.6609	8214.05				2.26891	0.00134	2.01871e+06	0.15073		2.26891	24.6321	0.34368	7.6435	0.55001		2.26891	10.9263	30.0953	0	75.3012	2.17426e-12		2.26891	2.01871e+06	33.1693	116.323
		2.28131	0.01288	4.97857e+06	0.17905		2.28131	5.32403	0.01531	1.40351	9.24704		2.28131	79.0886	32.3786	0	9642.02	3.25921e-11		2.28131	4.97857e+06	15.9899	9753.49				2.28131	0.02494	2.33772e+06	0.29365		2.28131	35.5857	0.9687	13.8147	0.69272		2.28131	15.7816	39.4418	0	89.8611	9.82685e-12		2.28131	2.33772e+06	51.0619	145.084
		2.29371	0.04433	5.70463e+06	0.32211		2.29371	7.81015	0.04362	2.52051	11.6241		2.29371	113.606	42.4488	0	11375	1.09904e-10		2.29371	5.70463e+06	21.9984	11531.1				2.29371	0.24384	2.69523e+06	0.54611		2.29371	50.677	2.50818	24.2288	0.86589		2.29371	22.5333	51.3041	0	106.789	3.80911e-11		2.29371	2.69523e+06	78.2799	180.626
		2.30611	0.20468	6.50926e+06	0.55825		2.30611	11.3124	0.11461	4.4068	14.535		2.30611	161.262	55.1966	0	13359.5	3.37057e-10		2.30611	6.50926e+06	30.3689	13575.9				2.30611	1.442	3.09397e+06	0.97515		2.30611	71.1771	6.042	41.3232	1.07417		2.30611	31.8232	66.2584	0	126.399	1.30836e-10		2.30611	3.09398e+06	119.616	224.481
		2.3185	0.89947	7.39799e+06	0.93597		2.3185	16.19	0.28089	7.51715	18.0836		2.3185	226.347	71.2162	0	15623.1	9.54029e-10		2.3185	7.398e+06	42.0716	15920.6				2.3185	6.17071	3.53671e+06	1.67965		2.3185	98.661	13.676	68.6872	1.32277		2.3185	44.4763	84.9798	0	149.031	4.07167e-10		2.3185	3.53671e+06	182.347	278.487
		2.3309	3.30408	8.37722e+06	1.52366		2.3309	22.9101	0.64786	12.5367	22.3882		2.3309	314.279	91.1896	0	18192.4	2.52028e-09		2.3309	8.37723e+06	58.4829	18597.8				2.3309	21.2162	4.02715e+06	2.80251		2.3309	135.029	29.3131	111.456	1.61715		2.3309	61.5545	108.281	0	175.057	1.16672e-09		2.3309	4.02717e+06	277.415	344.892
		2.3433	10.2792	9.45108e+06	2.41512		2.3433	32.0716	1.41689	20.4736	27.5869		2.3433	431.91	115.922	0	21097.8	6.26886e-09		2.3433	9.45109e+06	81.5491	21645.7				2.3433	62.3106	4.56827e+06	4.54402		2.3433	182.539	59.8661	176.838	1.96285		2.3433	84.3879	137.099	0	204.885	3.11523e-09		2.3433	4.56834e+06	421.207	426.372
		2.3557	27.9941	10626500	3.73748		2.3557	44.4448	2.95687	32.7959	33.8389		2.3557	587.709	146.33	0	24369	1.4786e-08		2.3557	10626500	114.036	25103.1				2.3557	162.313	5.16316e+06	7.17953		2.3557	243.887	117.094	274.713	2.36582		2.3557	114.659	172.541	0	238.953	7.82468e-09		2.3557	5.16333e+06	638.061	526.153
		2.3681	68.552	11909200	5.65882		2.3681	60.9997	5.91907	51.5925	41.3245		2.3681	792.212	183.463	1.01873e-15	28037.2	3.32607e-08		2.3681	11909200	159.836	29012.9				2.3681	384.513	5.8156e+06	11.0814		2.3681	322.163	220.256	418.365	2.83172		2.3681	154.464	215.889	3.84962e-17	277.765	1.8625e-08		2.3681	5.816e+06	963.615	648.118
		2.3805	154.004	13303100	8.39823		2.3805	82.9474	11.413	79.8043	50.246		2.3805	1058.23	228.54	5.02664e-14	32136	7.17039e-08		2.3805	13303300	224.411	33422.8				2.3805	843.048	6.529e+06	16.7435		2.3805	420.909	399.901	625.328	3.36643		2.3805	206.401	268.616	1.7874e-14	321.832	4.22703e-08		2.3805	6.52986e+06	1449.5	796.848
		2.39289	322.201	14815900	12.2378		2.39289	111.816	21.2796	121.525	60.8487		2.39289	1401.3	282.882	6.22775e-13	36696.7	1.4874e-07		2.39289	14816200	315.469	38380.9				2.39289	1732.79	7.3062e+06	24.8082		2.39289	544.111	702.914	918.286	3.97534		2.39289	273.625	332.423	3.4603e-13	371.706	9.19218e-08		2.39289	7.30796e+06	2169.29	977.754
		2.40529	634.905	16451300	17.5345		2.40529	149.461	38.4793	182.319	73.3857		2.40529	1840.17	348.034	4.58156e-12	41754	2.97913e-07		2.40529	16452000	443.645	43942.2				2.40529	3371.72	8.15164e+06	36.1045		2.40529	696.172	1199.36	1325.91	4.66355		2.40529	360.058	409.255	3.30663e-12	427.978	1.92347e-07		2.40529	8.15505e+06	3226.11	1197.29
		2.41769	1188.76	18218100	24.7357		2.41769	198.205	67.6791	269.784	88.1668		2.41769	2397.23	425.672	2.48274e-11	47340.9	5.77856e-07		2.41769	18219300	623.835	50163.8				2.41769	6258.42	9.06774e+06	51.6817		2.41769	881.995	1991.04	1884.42	5.43578		2.41769	470.392	501.349	3.16379e-11	491.316	3.8868e-07		2.41769	9.07405e+06	4762.89	1463.06
		2.43009	2129.66	20119100	34.3941		2.43009	260.827	116.037	393.99	105.52		2.43009	3098.73	517.672	1.09152e-10	53490.4	1.0883e-06		2.43009	20121200	876.375	57106.8				2.43009	11148.1	10058000	72.8526		2.43009	1106.76	3222.26	2637.97	6.29639		2.43009	610.344	611.227	3.79571e-10	562.428	7.60802e-07		2.43009	10069200	6973.29	1784
		2.44249	3670.54	22161700	47.1858		2.44249	340.736	194.347	568.341	125.827		2.44249	3975.81	626.098	4.13088e-10	60235.5	1.99458e-06		2.44249	22165500	1229.25	64837.4				2.44249	19151.9	11127400	101.259		2.44249	1376.06	5092.83	3640.06	7.24872		2.44249	786.717	741.724	3.86237e-09	642.025	1.44637e-06		2.44249	11146600	10116.2	2170.47
		2.45489	6114.67	24350700	63.9314		2.45489	441.985	318.538	810.294	149.5		2.45489	5064.89	753.202	1.42794e-09	67612.9	3.56465e-06		2.45489	24356800	1720.32	73431				2.45489	31859.8	12277900	138.88		2.45489	1695.75	7874.24	4954.71	8.29517		2.45489	1007.66	896.124	2.94299e-08	730.919	2.67674e-06		2.45489	12309900	14533	2634.7
		2.46729	9881.23	26691800	85.6167		2.46729	569.488	511.739	1142.54	177.016		2.46729	6407.97	901.428	4.83101e-09	75648.8	6.22298e-06		2.46729	26701700	2400.78	82958.2				2.46729	51495.2	13513700	188.15		2.46729	2071.93	11926.4	6656.92	9.4382		2.46729	1282.82	1077.93	1.74494e-07	829.969	4.83212e-06		2.46729	13565400	20664.7	3190.72
		2.47968	15540.9	29190600	113.41		2.47968	729.007	806.936	1594.21	208.872		2.47968	8052.99	1073.44	1.68156e-08	84379.9	1.06294e-05		2.47968	29206300	3339.03	93506.3				2.47968	81102.3	14837800	251.98		2.47968	2510.83	17719.6	8834.13	10.6788		2.47968	1623.56	1291.28	8.48398e-07	939.993	8.52431e-06		2.47968	14919100	29075.3	3854.83
		2.49208	23851.4	31851700	148.696		2.49208	927.409	1250.56	2202.25	245.651		2.49208	10055.9	1272.13	6.01209e-08	93834.7	1.77881e-05		2.49208	31875700	4625.86	105163				2.49208	124770	16254000	333.838		2.49208	3018.75	25856.3	11586.3	12.0172		2.49208	2043.29	1540.61	3.52388e-06	1062.02	1.47189e-05		2.49208	16379100	40473.4	4645.92
		2.50448	35802.7	34681900	193.097		2.50448	1172.76	1906.85	3013.48	287.979		2.50448	12479.1	1500.54	2.12674e-07	104038	2.92041e-05		2.50448	34717900	6381.06	118018				2.50448	187888	17765600	437.823		2.50448	3602.24	37094	15027.1	13.4534		2.50448	2557.62	1830.99	1.28873e-05	1197	2.49113e-05		2.50448	17953900	55736.8	5585.61
		2.51688	52664.7	37683200	248.484		2.51688	1474.42	2863.67	4086.22	336.526		2.51688	15394.3	1761.93	7.18469e-07	115024	4.70939e-05		2.51688	37736100	8760.83	132181				2.51688	277466	19375900	568.76		2.51688	4267.44	52378.5	19283.1	14.9858		2.51688	3184.62	2167.93	4.24154e-05	1345.98	4.13802e-05		2.51688	19653900	75944.1	6698.52
		2.52928	76052.5	40865400	317.062		2.52928	1843.39	4239.56	5493.17	392.055		2.52928	18880.2	2059.77	2.2755e-06	126814	7.46655e-05		2.52928	40941800	11968.2	147754				2.52928	402465	21088500	732.298		2.52928	5020.79	72861.5	24497.2	16.6139		2.52928	3945.68	2557.51	0.000127759	1510.13	6.75408e-05		2.52928	21491700	102396	8013.32
		2.54168	107979	44229800	401.27		2.54168	2292.16	6192.57	7323.49	455.359		2.54168	23029	2397.74	6.72341e-06	139431	0.000116511		2.54168	44338200	16263.6	164858				2.54168	574185	22904800	934.791		2.54168	5867.95	99934.6	30822.6	18.3335		2.54168	4864.95	3006.63	0.000356699	1690.55	0.000108441		2.54168	23479900	136643	9562.13
		2.55407	150927	47783200	504.055		2.55407	2835.37	8930.76	9686.63	527.325		2.55407	27936.7	2779.64	1.85687e-05	152896	0.000179086		2.55407	47934600	21980.1	183612				2.55407	806790	24830100	1183.78		2.55407	6815.19	135268	38431	20.1441		2.55407	5970.03	3522.41	0.00093237	1888.57	0.000171425		2.55407	25638100	180535	11381
		2.56647	207912	51527100	628.547		2.56647	3489.58	12725.8	12715.1	608.91		2.56647	33715.3	3209.39	4.81596e-05	167239	0.000271373		2.56647	51735600	29539.3	204163				2.56647	1.11768e+06	26867000	1487.83		2.56647	7868.62	180815	47504.7	22.0421		2.56647	7293.23	4113.16	0.0023	2105.34	0.000267038		2.56647	27986200	236210	13511.7
		2.57887	282606	55464500	778.439		2.57887	4273.57	17928.6	16569.1	701.097		2.57887	40484.3	3691.3	0.000117958	182466	0.000405701		2.57887	55747800	39472.4	226642				2.57887	1.5281e+06	29018400	1856.58		2.57887	9032.46	238868	58240.7	24.0236		2.57887	8870.69	4787.5	0.00539	2342.19	0.00041026		2.57887	30548400	306165	16000.4
		2.59127	379356	59607000	957.884		2.59127	5209.22	24986	21439.9	805.02		2.59127	48376.9	4229.64	0.000274293	198591	0.000598794		2.59127	59987300	52440.1	251197				2.59127	2.06379e+06	31287300	2301.02		2.59127	10312.3	312073	70851.9	26.085		2.59127	10743.9	5555.41	0.01208	2600.63	0.00062211		2.59127	33353400	393263	18900
		2.60367	503362	63956500	1171.49		2.60367	6320.34	34467.7	27556.5	921.789		2.60367	57538.4	4829.03	0.000608572	215631	0.000873119		2.60367	64461000	69266.3	277999				2.60367	2.75532e+06	33675600	2833.27		2.60367	11714.1	403466	85552.5	28.2239		2.60367	12960.3	6426.9	0.02596	2882.07	0.000931667		2.60367	36433800	500761	22269.3
		2.61607	660657	68512800	1424.32		2.61607	7633.78	47078.4	35187.3	1052.7		2.61607	68125.1	5493.77	0.00129	233601	0.00126		2.61607	69174900	90952.1	307220				2.61607	3.63935e+06	36187600	3467.33		2.61607	13240.8	516498	102590	30.4356		2.61607	15571.3	7413.79	0.05376	3187.93	0.00138		2.61607	39830500	632360	26173
		2.62846	858306	73280300	1722		2.62846	9179.88	63705.9	44650	1198.97		2.62846	80299.4	6228.49	0.00265	252493	0.00179		2.62846	74140300	118735	339021				2.62846	4.75882e+06	38823600	4218.43		2.62846	14897.7	655017	122208	32.7172		2.62846	18636.8	8527.09	0.10764	3519.86	0.00202		2.62846	43586600	792156	30683.9
		2.64086	1.10444e+06	78263000	2070.79		2.64086	10993	85445.8	56318.8	1362.08		2.64086	94254.4	7038.71	0.00523	272332	0.00253		2.64086	79369500	154120	373626				2.64086	6.16409e+06	41589400	5103.53		2.64086	16688.5	823364	144661	35.0651		2.64086	22223.4	9781.19	0.20892	3879.55	0.00292		2.64086	47758600	984748	35884.4
		2.65326	1.40852e+06	83465200	2477.76		2.65326	13109.2	113622	70619.4	1543.38		2.65326	110180	7928.12	0.00999	293100	0.00353		2.65326	84876200	198894	411208				2.65326	7.91318e+06	44485100	6141.6		2.65326	18617.1	1.0264e+06	170219	37.4759		2.65326	26405.8	11190.1	0.39413	4268.74	0.00419		2.65326	52404400	1.21527e+06	41865
		2.66566	1.78107e+06	88889600	2950.35		2.66566	15571	149868	88058.7	1744.51		2.66566	128283	8902.62	0.01854	314807	0.00489		2.66566	90673600	255242	451992				2.66566	10073700	47512500	7353.05		2.66566	20686.3	1.26936e+06	199160	39.9438		2.66566	31265.9	12768.4	0.72426	4688.65	0.00595		2.66566	57593600	1.48925e+06	48723.6
		2.67806	2.23425e+06	94540000	3496.79		2.67806	18420.9	196118	109196	1966.74		2.67806	148788	9966.44	0.03346	337451	0.0067		2.67806	96777700	325701	496205				2.67806	12722500	50676000	8760.84		2.67806	22900.9	1.55824e+06	231785	42.471		2.67806	36896.9	14532.7	1.29897	5141.86	0.00836		2.67806	63407300	1.81297e+06	56572.8
		2.69046	2.78177e+06	100417000	4126.25		2.69046	21709.3	254709	134688	2211.95		2.69046	171925	11125	0.05891	361049	0.0091		2.69046	103203000	413318	544099				2.69046	15945900	53975800	10389.2		2.69046	25262.2	1.89915e+06	268365	45.0498		2.69046	43397.5	16500.3	2.27774	5629.68	0.01166		2.69046	69932200	2.19282e+06	65529.7
		2.70286	3.43869e+06	106531000	4848.33		2.70286	25487.1	328414	165277	2481.77		2.70286	197952	12383.1	0.10127	385549	0.01226		2.70286	109975000	521660	595885				2.70286	19845800	57415500	12266		2.70286	27772.5	2.29937e+06	309218	47.6794		2.70286	50882	18689.4	3.91089	6154.08	0.01611		2.70286	77273600	2.63641e+06	75729.4
		2.71525	4.22213e+06	112870000	5673.64		2.71525	29815	420500	201818	2777.92		2.71525	227118	13745.9	0.17035	410987	0.01639		2.71525	117098000	654911	651851				2.71525	24533100	60996800	14419.8		2.71525	30435.9	2.76595e+06	354664	50.3552		2.71525	59475.7	21120.7	6.5846	6717.09	0.02209		2.71525	85544300	3.1511e+06	87320.1
		2.72765	5.15077e+06	119446000	6613.68		2.72765	34751.6	534785	245225	3101.77		2.72765	259711	15218.7	0.28075	437323	0.02173		2.72765	124604000	817864	712253				2.72765	30131600	64720900	16882.1		2.72765	33252.5	3.30716e+06	404985	53.0759		2.72765	69312.5	23813.6	10.8846	7320.87	0.03005		2.72765	94869400	3.74545e+06	100458
		2.74005	6.24533e+06	126257000	7680.82		2.74005	40360.5	675693	296548	3455.43		2.74005	296013	16804.1	0.45394	464552	0.02861		2.74005	132510000	1.01606e+06	777370				2.74005	36782900	68583500	19687.2		2.74005	36227.7	3.93169e+06	460549	55.8417		2.74005	80543.3	26790	17.685	7967.42	0.04058		2.74005	105386000	4.42852e+06	115318
		2.75245	7.529e+06	133307000	8888.1		2.75245	46715.5	848417	356987	3840.46		2.75245	336308	18509.8	0.72095	492663	0.03739		2.75245	140845000	1.25596e+06	847482				2.75245	44641100	72599400	22871.3		2.75245	39359.5	4.64851e+06	521654	58.646		2.75245	93323.5	30074.9	28.2689	8658.38	0.0544		2.75245	117263000	5.20958e+06	132085
		2.76485	9.02624e+06	140590000	10249.6		2.76485	53886.9	1.05883e+06	427815	4258.6		2.76485	380942	20340	1.12593	521653	0.04854		2.76485	149626000	1.54479e+06	922936				2.76485	53881400	76757200	26474.1		2.76485	42652.2	5.46745e+06	588630	61.4915		2.76485	107840	33692.7	44.5061	9396.6	0.07242		2.76485	130665000	6.0988e+06	150974
		2.77725	10764500	148124000	11780.9		2.77725	61954	1.31364e+06	510463	4711.69		2.77725	430209	22298.7	1.73085	551477	0.0626		2.77725	158900000	1.89077e+06	1.00399e+06				2.77725	64684600	81068200	30537.4		2.77725	46106.6	6.39873e+06	661852	64.3706		2.77725	124287	37669.1	69.0646	10184.3	0.09578		2.77725	145783000	7.10675e+06	172210
		2.78964	12772600	155894000	13498		2.78964	70997.6	1.62051e+06	606500	5201.27		2.78964	484463	24390.9	2.62155	582164	0.08023		2.78964	168680000	2.30321e+06	1.09102e+06				2.78964	77266800	85524500	35106		2.78964	49724	7.45336e+06	741569	67.2848		2.78964	142858	42030.7	105.722	11022.4	0.12587		2.78964	162826000	8.24472e+06	196017
		2.80204	15083200	163904000	15418		2.80204	81099.2	1.98803e+06	717614	5728.85		2.80204	544034	26619.9	3.91489	613637	0.10219		2.80204	179003000	2.79247e+06	1.18429e+06				2.80204	91850500	90132600	40226.9		2.80204	53502.7	8.64303e+06	828219	70.2312		2.80204	163798	46807.4	159.755	11914.5	0.16438		2.80204	182023000	9.52482e+06	222680
		2.81444	17730300	172163000	17559.4		2.81444	92345.9	2.42588e+06	845585	6296.12		2.81444	609272	28991.9	5.76929	645884	0.1294		2.81444	189911000	3.3701e+06	1.28415e+06				2.81444	108682000	94892100	45950.9		2.81444	57450.2	9.97939e+06	922076	73.2096		2.81444	187346	52029.1	238.469	12863	0.21342		2.81444	203620000	10959000	252476
		2.82684	20750600	180662000	19941.3		2.82684	104833	2.94476e+06	992544	6904.74		2.82684	680584	31510.6	8.39531	678935	0.16295		2.82684	201433000	4.04905e+06	1.39104e+06				2.82684	128032000	99806600	52333.7		2.82684	61560.7	11474700	1.02348e+06	76.218		2.82684	213768	57729.5	351.841	13869	0.27551		2.82684	227891000	12559800	285719
		2.83924	24183300	189405000	22584.7		2.83924	118646	3.55665e+06	1.16045e+06	7555.62		2.83924	758313	34180.7	12.0721	712731	0.20408		2.83924	213611000	4.8433e+06	1.50524e+06				2.83924	150186000	104870000	59428.6		2.83924	65835.8	13142400	1.13279e+06	79.2547		2.83924	243343	63938.3	513.406	14936.5	0.3537		2.83924	255115000	14341100	322732
		2.85164	28071300	198392000	25510.5		2.85164	133887	4.27453e+06	1.35168e+06	8250.48		2.85164	842854	37004.4	17.1631	747252	0.25425		2.85164	226489000	5.76835e+06	1.62713e+06				2.85164	175463000	110092000	67297.7		2.85164	70281.8	14995600	1.25034e+06	82.3185		2.85164	276387	70692	741.315	16067	0.45169		2.85164	285622000	16316300	363887
		2.86403	32457700	207621000	28742.6		2.86403	150641	5.11283e+06	1.56856e+06	8989.9		2.86403	934581	39988.5	24.1398	782464	0.31515		2.86403	240108000	6.84101e+06	1.75706e+06				2.86403	204185000	115462000	75997.9		2.86403	74896.8	17049600	1.37653e+06	85.4119		2.86403	313221	78028.3	1059.64	17262.6	0.5738		2.86403	319723000	18501100	409573
		2.87643	37392200	217104000	32304.2		2.87643	169007	6.08724e+06	1.8137e+06	9775.47		2.87643	1.03392e+06	43133.6	33.6052	818369	0.38874		2.87643	254528000	8.07973e+06	1.89545e+06				2.87643	236738000	120993000	85605.9		2.87643	79681.5	19317800	1.51154e+06	88.5286		2.87643	354199	85982.8	1500.25	18526.7	0.72537		2.87643	357817000	20909100	460210
		2.88883	42918100	226804000	36219.1		2.88883	189090	7.21433e+06	2.08973e+06	10607.6		2.88883	1.14126e+06	46448.3	46.3289	854928	0.47726		2.88883	269759000	9.50376e+06	2.04268e+06				2.88883	273465000	126675000	96180.3		2.88883	84635.2	21814800	1.65588e+06	91.6653		2.88883	399685	94599.2	2104.66	19861	0.91253		2.88883	400235000	23555400	516251
		2.90123	49098000	236778000	40518		2.90123	210984	8.51289e+06	2.39945e+06	11487.2		2.90123	1.25701e+06	49932.1	63.2755	892104	0.58328		2.90123	285917000	11134800	2.19911e+06				2.90123	314801000	132508000	107796		2.90123	89765.6	24557500	1.80974e+06	94.8292		2.90123	450112	103915	2926.84	21268.5	1.14265		2.90123	447417000	26457100	578223
		2.91363	55985100	246971000	45227.6		2.91363	234788	10001600	2.74576e+06	12414.3		2.91363	1.38152e+06	53590.7	85.6531	929875	0.70969		2.91363	303002000	12994500	2.36507e+06				2.91363	361195000	138497000	120530		2.91363	95069.2	27559100	1.97346e+06	98.0154		2.91363	505873	113980	4036.17	22752.2	1.4244		2.91363	499812000	29627700	646643
		2.92603	63630900	257419000	50372.6		2.92603	260607	11701800	3.1316e+06	13390		2.92603	1.51544e+06	57431	114.968	968274	0.85986		2.92603	321101000	15107400	2.54126e+06				2.92603	413090000	144643000	134462		2.92603	100549	30839200	2.14755e+06	101.22		2.92603	567433	124833	5521.21	24312.9	1.76785		2.92603	557868000	33087400	722102
		2.93843	72099700	268083000	55985.3		2.93843	288539	13635700	3.56018e+06	14413.6		2.93843	1.65897e+06	61454.1	153.07	1.00716e+06	1.03751		2.93843	340239000	17498800	2.72774e+06				2.93843	470963000	150934000	149674		2.93843	106216	34410900	2.33194e+06	104.445		2.93843	635245	136524	7494.67	25954.4	2.18482		2.93843	622047000	36849100	805220
		2.95082	81459400	279005000	62101		2.95082	318715	15825600	4.03466e+06	15485.5		2.95082	1.81265e+06	65665.9	202.21	1.0466e+06	1.24689		2.95082	360527000	20194500	2.92512e+06				2.95082	535357000	157389000	166240		2.95082	112069	38293600	2.5273e+06	107.691		2.95082	709899	149116	10098.9	27680.5	2.68925		2.95082	692913000	40933100	896797
		2.96322	91775900	290162000	68750.7		2.96322	351211	18296300	4.55807e+06	16605.2		2.96322	1.97679e+06	70069.7	265.148	1.08658e+06	1.49278		2.96322	382007000	23222200	3.13371e+06				2.96322	606816000	163997000	184274		2.96322	118115	42503400	2.73376e+06	110.956		2.96322	791829	162635	13511	29491	3.29671		2.96322	770997000	45355400	997470
		2.97562	103111000	301554000	75966.2		2.97562	386193	21073700	5.13378e+06	17772		2.97562	2.15196e+06	74673.6	345.193	1.12698e+06	1.78048		2.97562	404741000	26611500	3.35396e+06				2.97562	685867000	170761000	203832		2.97562	124368	47055800	2.95158e+06	114.24		2.97562	881672	177173	17953.4	31391.3	4.02605		2.97562	856832000	50131800	1.10819e+06
		2.98802	115546000	313178000	83787.2		2.98802	423750	24182900	5.76513e+06	18986		2.98802	2.33857e+06	79483.8	446.348	1.16787e+06	2.11587		2.98802	428808000	30390700	3.58637e+06				2.98802	773155000	177663000	225035		2.98802	130838	51973900	3.18117e+06	117.545		2.98802	979983	192764	23698.7	33382.6	4.89827		2.98802	951043000	55286000	1.22983e+06
		3.00042	129143000	325027000	92245.8		3.00042	464077	27652500	6.45557e+06	20247.4		3.00042	2.53701e+06	84505.6	573.357	1.2092e+06	2.50579		3.00042	454263000	34592400	3.83129e+06				3.00042	869302000	184736000	247965		3.00042	137540	57270800	3.42277e+06	120.871		3.00042	1.08745e+06	209489	31085.8	35467.8	5.93783		3.00042	1054290000	60831300	1.3635e+06
		3.01282	143997000	337115000	101388		3.01282	507303	31507900	7.20788e+06	21551.3		3.01282	2.74771e+06	89749	731.837	1.25092e+06	2.95741		3.01282	481213000	39244600	4.08911e+06				3.01282	974995000	191949000	272742		3.01282	144495	62964500	3.67654e+06	124.22		3.01282	1.2047e+06	227419	40528.9	37650.7	7.17276		3.01282	1167220000	66785700	1.51031e+06
		3.02521	160175000	349423000	111243		3.02521	553657	35780700	8.02607e+06	22900.9		3.02521	2.97105e+06	95219	928.477	1.293e+06	3.47895		3.02521	509709000	44383300	4.3602e+06				3.02521	1090810000	199313000	299448		3.02521	151731	69073200	3.94282e+06	127.591		3.02521	1.33243e+06	246616	52528.3	39932	8.63437		3.02521	1290420000	73167900	1.67152e+06
		3.03761	177754000	361947000	121860		3.03761	603363	40498900	8.91292e+06	24291.3		3.03761	3.20765e+06	100932	1171.12	1.33544e+06	4.07943		3.03761	539823000	50039500	4.6452e+06				3.03761	1217550000	206826000	328208		3.03761	159276	75618400	4.22188e+06	130.987		3.03761	1.47139e+06	267187	67694.9	42316.9	10.3601		3.03761	1424710000	79999700	1.8486e+06
		3.05001	196832000	374709000	133277		3.05001	656690	45690700	9.87134e+06	25723.6		3.05001	3.45799e+06	106896	1468.86	1.37824e+06	4.76875		3.05001	571674000	56244500	4.9446e+06				3.05001	1355940000	214482000	359113		3.05001	167179	82616200	4.51407e+06	134.414		3.05001	1.62232e+06	289211	86767.9	44806.1	12.3898		3.05001	1570780000	87297600	2.04312e+06
		3.06241	217482000	387681000	145545		3.06241	713943	51384200	10904900	27194.5		3.06241	3.72216e+06	113128	1832.43	1.42132e+06	5.55781		3.06241	605309000	63030200	5.25844e+06				3.06241	1506760000	222289000	392290		3.06241	175489	90083800	4.81932e+06	137.872		3.06241	1.78603e+06	312805	110625	47404.4	14.7706		3.06241	1729450000	95078800	2.25688e+06
		3.07481	239805000	400873000	158695		3.07481	775614	57614300	12016500	28703.2		3.07481	4.00077e+06	119648	2273.88	1.46471e+06	6.45854		3.07481	640836000	70435100	5.58741e+06				3.07481	1670810000	230242000	427853		3.07481	184258	98040300	5.13795e+06	141.37		3.07481	1.96331e+06	338076	140323	50116.2	17.5547		3.07481	1901480000	103363000	2.49184e+06
		3.08721	263884000	414280000	172794		3.08721	842058	64407100	13209900	30248		3.08721	4.29419e+06	126471	2807.79	1.5083e+06	7.48409		3.08721	678337000	78489300	5.93177e+06				3.08721	1848890000	238345000	465914		3.08721	193600	106507000	5.47052e+06	144.918		3.08721	2.15507e+06	365183	177116	52941.7	20.8017		3.08721	2087700000	112171000	2.75034e+06
		3.0996	289804000	427897000	187867		3.0996	913969	71790300	14486100	31826.2		3.0996	4.60293e+06	133626	3450.13	1.55227e+06	8.64852		3.0996	717888000	87222200	6.29229e+06				3.0996	2041800000	246585000	506594		3.0996	203579	115501000	5.81682e+06	148.508		3.0996	2.36222e+06	394235	222494	55885.6	24.5778		3.0996	2288890000	121522000	3.03486e+06
		3.112	317677000	441728000	203976		3.112	992051	79799100	15848800	33435.7		3.112	4.92738e+06	141138	4219.69	1.59639e+06	9.96745		3.112	759609000	96673400	6.66914e+06				3.112	2250450000	254960000	550022		3.112	214350	125029000	6.1771e+06	152.171		3.112	2.58566e+06	425476	278204	58949.9	28.9566		3.112	2505960000	131421000	3.34832e+06
		3.1244	347587000	455753000	221171		3.1244	1.07715e+06	88450600	17301100	35075.1		3.1244	5.26791e+06	149048	5137.64	1.64068e+06	11.4576		3.1244	803561000	106864000	7.06278e+06				3.1244	2475850000	263483000	596312		3.1244	226054	135132000	6.55165e+06	155.908		3.1244	2.82645e+06	459079	346307	62143.7	34.0226		3.1244	2739930000	141910000	3.69401e+06
		3.1368	379638000	470008000	239503		3.1368	1.17032e+06	97786400	18844500	36743		3.1368	5.62486e+06	157383	6227.88	1.6852e+06	13.1374		3.1368	849885000	117838000	7.47368e+06				3.1368	2718800000	272143000	645584		3.1368	238883	145801000	6.94055e+06	159.742		3.1368	3.0856e+06	495297	429227	65470.2	39.8682		3.1368	2991590000	152980000	4.07563e+06
		3.1492	413926000	484430000	259019		3.1492	1.27283e+06	107830000	20482000	38435.8		3.1492	5.99863e+06	166192	7517.49	1.72981e+06	15.0262		3.1492	898615000	129623000	7.90217e+06				3.1492	2980290000	280940000	698018		3.1492	253074	157079000	7.34437e+06	163.683		3.1492	3.36393e+06	534402	529749	68928.2	46.5943		3.1492	3261930000	164677000	4.49706e+06
		3.1616	450554000	499078000	279783		3.1616	1.38623e+06	118600000	22215500	40151.7		3.1616	6.39005e+06	175544	9038.06	1.77463e+06	17.1461		3.1616	949912000	142242000	8.34928e+06				3.1616	3261300000	289872000	753697		3.1616	268890	168969000	7.76255e+06	167.757		3.1616	3.66283e+06	576742	651160	72531	54.317		3.1616	3551920000	177001000	4.96331e+06
		3.174	489615000	513876000	301838		3.174	1.51228e+06	130131000	24046700	41892		3.174	6.79845e+06	185481	10822.8	1.81953e+06	19.5197		3.174	1003790000	155731000	8.8143e+06				3.174	3562700000	298935000	812793		3.174	286676	181495000	8.19528e+06	171.997		3.174	3.98306e+06	622704	797205	76276.9	63.1616		3.174	3862450000	189977000	5.47931e+06
		3.18639	531215000	528890000	325255		3.18639	1.65325e+06	142442000	25977400	43651		3.18639	7.22522e+06	196091	12911.2	1.8646e+06	22.1716		3.18639	1060430000	170116000	9.29884e+06				3.18639	3885910000	308131000	875386		3.18639	306839	194667000	8.64362e+06	176.42		3.18639	4.32629e+06	672791	972324	80182	73.2714		3.18639	4194910000	203618000	6.05166e+06
		3.19879	575502000	544115000	350079		3.19879	1.81173e+06	155564000	28010100	45427		3.19879	7.67048e+06	207452	15345.1	1.90972e+06	25.1286		3.19879	1119970000	185431000	9.80302e+06				3.19879	4231490000	317471000	941687		3.19879	329853	208509000	9.10692e+06	181.075		3.19879	4.6934e+06	727533	1.18143e+06	84247.1	84.7969		3.19879	4549900000	217946000	6.6867e+06
		3.21119	622505000	559502000	376375		3.21119	1.99071e+06	169510000	30144900	47220.2		3.21119	8.13414e+06	219667	18173.2	1.95493e+06	28.4192		3.21119	1182380000	201692000	10326900				3.21119	4600780000	326910000	1.01175e+06		3.21119	356287	223031000	9.5852e+06	185.997		3.21119	5.0855e+06	787573	1.43036e+06	88481.8	97.9083		3.21119	4928700000	232973000	7.39202e+06
		3.22359	672380000	575060000	404185		3.22359	2.19392e+06	184310000	32386600	49027.9		3.22359	8.61705e+06	232844	21448	2.0002e+06	32.0743		3.22359	1247840000	218940000	10871600				3.22359	4995130000	336502000	1.08584e+06		3.22359	386827	238258000	10079000	191.238		3.22359	5.50413e+06	853734	1.72571e+06	92902	112.795		3.22359	5332720000	248724000	8.17659e+06
		3.23599	725198000	590801000	433616		3.23599	2.42558e+06	199979000	34731200	50848.7		3.23599	9.1192e+06	247120	25228.1	2.04555e+06	36.126		3.23599	1316430000	237187000	11437100				3.23599	5414870000	346201000	1.16396e+06		3.23599	422231	254185000	10587600	196.842		3.23599	5.95046e+06	926904	2.07496e+06	97507.1	129.667		3.23599	5762230000	265195000	9.04996e+06
		3.24839	781130000	606687000	464694		3.24839	2.69085e+06	216540000	37183300	52682		3.24839	9.6414e+06	262654	29578.6	2.09099e+06	40.6111		3.24839	1388280000	256467000	12024700				3.24839	5861960000	356029000	1.24639e+06		3.24839	463526	270884000	11112900	202.912		3.24839	6.42569e+06	1.0081e+06	2.48655e+06	102323	148.73		3.24839	6219230000	282461000	10022800
		3.26078	840217000	622772000	497484		3.26078	2.99536e+06	234005000	39742700	54527.9		3.26078	10183400	279588	34569.1	2.13642e+06	45.5635		3.26078	1463490000	276797000	12634000				3.26078	6336910000	365959000	1.33314e+06		3.26078	511673	288281000	11652200	209.463		3.26078	6.93111e+06	1.09873e+06	2.97015e+06	107353	170.253		3.26078	6704200000	300446000	11107500
		3.27318	902609000	639020000	532056		3.27318	3.34619e+06	252387000	42412500	56383.4		3.27318	10745600	298162	40279	2.18175e+06	51.0274		3.27318	1542160000	298202000	13265900				3.27318	6841440000	376027000	1.42452e+06		3.27318	568049	306461000	12208000	216.635		3.27318	7.46864e+06	1.20018e+06	3.53672e+06	112620	194.49		3.27318	7218890000	319237000	12318400
		3.28558	968401000	655435000	568453		3.28558	3.75103e+06	271712000	45188000	58245.9		3.28558	11328100	318558	46791.6	2.2271e+06	57.0394		3.28558	1624400000	320709000	13920600				3.28558	7375940000	386196000	1.5205e+06		3.28558	634067	325426000	12779400	224.492		3.28558	8.03961e+06	1.31424e+06	4.19846e+06	118149	221.735		3.28558	7763660000	338840000	13670700
		3.29798	1037740000	672023000	606802		3.29798	4.21939e+06	291995000	48076500	60121.6		3.29798	11932300	341071	54202.1	2.27264e+06	63.6508		3.29798	1710370000	344351000	14600200				3.29798	7942850000	396508000	1.62144e+06		3.29798	711397	345164000	13365700	233.139		3.29798	8.64522e+06	1.44296e+06	4.96913e+06	123951	252.308		3.29798	8340980000	359241000	15181500
		3.31038	1110640000	688724000	647110		3.31038	4.76141e+06	313225000	51072100	62002.9		3.31038	12557000	365973	62611.4	2.31813e+06	70.9096		3.31038	1800010000	369121000	15303800				3.31038	8541880000	406898000	1.72717e+06		3.31038	802015	365718000	13968800	242.722		3.31038	9.28673e+06	1.58875e+06	5.86445e+06	130058	286.559		3.31038	8950510000	380490000	16870300
		3.32278	1187320000	705618000	689487		3.32278	5.38962e+06	335448000	54179800	63896.8		3.32278	13203200	393604	72128.4	2.36353e+06	78.8621		3.32278	1893630000	395082000	16032600				3.32278	9175650000	417429000	1.83835e+06		3.32278	908090	387079000	14586800	253.345		3.32278	9.96619e+06	1.75439e+06	6.90136e+06	136502	324.861		3.32278	9594920000	402575000	18758800
		3.33517	1267810000	722626000	733960		3.33517	6.11772e+06	358649000	57397700	65799.7		3.33517	13870800	424327	82874.6	2.40892e+06	87.5643		3.33517	1991170000	422230000	16787000				3.33517	9844160000	428040000	1.95456e+06		3.33517	1.03217e+06	409277000	15220400	265.189		3.33517	10684700	1.94309e+06	8.0994e+06	143307	367.614		3.33517	10274200000	425530000	20870800
		3.34757	1352180000	739787000	780616		3.34757	6.96159e+06	382840000	60725400	67712.6		3.34757	14561200	458593	94973.1	2.45445e+06	97.0769		3.34757	2092750000	450595000	17569300				3.34757	10549600000	438760000	2.07642e+06		3.34757	1.17712e+06	432319000	15869700	278.413		3.34757	11444300	2.15865e+06	9.47984e+06	150516	415.282		3.34757	10990500000	449367000	23233800
		3.35997	1440640000	757071000	829534		3.35997	7.93916e+06	408038000	64164500	69641		3.35997	15272500	496843	108569	2.49986e+06	107.457		3.35997	2198540000	480211000	18377900				3.35997	11292900000	449595000	2.20372e+06		3.35997	1.34617e+06	456215000	16534200	293.215		3.35997	12246200	2.40545e+06	11066400	158175	468.314		3.35997	11744700000	474096000	25876600
		3.37237	1533340000	774525000	880802		3.37237	9.07123e+06	434243000	67715100	71576.9		3.37237	16007000	539638	123809	2.54529e+06	118.774		3.37237	2308740000	511101000	19215900				3.37237	12074800000	460524000	2.33688e+06		3.37237	1.54292e+06	480967000	17214700	309.786		3.37237	13092200	2.68845e+06	12885800	166328	527.228		3.37237	12537600000	499724000	28833200
		3.38477	1630210000	792075000	934415		3.38477	10380600	461454000	71373400	73533		3.38477	16763500	587566	140858	2.59077e+06	131.09		3.38477	2423220000	543282000	20082900				3.38477	12897500000	471545000	2.47598e+06		3.38477	1.77156e+06	506598000	17911200	328.366		3.38477	13984000	3.0134e+06	14966800	175032	592.595		3.38477	13371600000	526281000	32139800
		3.39717	1731560000	809778000	990563		3.39717	11893200	489667000	75145700	75506.6		3.39717	17543000	641300	159888	2.63626e+06	144.484		3.39717	2542330000	576782000	20980500				3.39717	13762100000	482669000	2.62114e+06		3.39717	2.03654e+06	533114000	18622500	349.217		3.39717	14923200	3.38701e+06	17342400	184353	665.031		3.39717	14247400000	553773000	35837600
		3.40957	1837280000	827581000	1.0492e+06		3.40957	13638300	518937000	79025200	77501.2		3.40957	18345200	701590	181082	2.68178e+06	159.035		3.40957	2665910000	611678000	21909800				3.40957	14669000000	493890000	2.77251e+06		3.40957	2.34304e+06	560512000	19349400	372.608		3.40957	15911600	3.81675e+06	20046900	194356	745.172		3.40957	15165700000	582205000	39970400
		3.42196	1947620000	845529000	1.11046e+06		3.42196	15648700	549214000	83014300	79522.6		3.42196	19170200	769263	204642	2.72737e+06	174.816		3.42196	2794260000	647956000	22871600				3.42196	15620300000	505198000	2.93031e+06		3.42196	2.69674e+06	588853000	20091800	398.865		3.42196	16951300	4.3115e+06	23119600	205127	833.7		3.42196	16128400000	611642000	44588400
		3.43436	2062590000	863584000	1.17449e+06		3.43436	17960900	580493000	87110600	81569.3		3.43436	20018700	845284	230778	2.77308e+06	191.927		3.43436	2927350000	685646000	23868000				3.43436	16617000000	516596000	3.0947e+06		3.43436	3.10393e+06	618065000	20849500	428.31		3.43436	18042300	4.88052e+06	26602400	216748	931.354		3.43436	17136700000	642018000	49743000
		3.44676	2182460000	881751000	1.24124e+06		3.44676	20615500	612803000	91317400	83652.3		3.44676	20890800	930616	259716	2.81886e+06	210.453		3.44676	3065450000	724820000	24900200				3.44676	17661200000	528081000	3.26571e+06		3.44676	3.57148e+06	648214000	21622500	461.316		3.44676	19189400	5.53572e+06	30543400	229324	1038.99		3.44676	18192500000	673409000	55498900
		3.45916	2307120000	900036000	1.31077e+06		3.45916	23657000	646114000	95631000	85771		3.45916	21786500	1.02644e+06	291692	2.86471e+06	230.485		3.45916	3208460000	765487000	25969600				3.45916	18752800000	539647000	3.44356e+06		3.45916	4.10723e+06	679315000	22410400	498.287		3.45916	20391900	6.28931e+06	34991900	242965	1157.49		3.45916	19295900000	705833000	61917300
		3.47156	2436760000	918382000	1.3833e+06		3.47156	27136700	680449000	100052000	87934.5		3.47156	22703600	1.13396e+06	326971	2.91062e+06	252.134		3.47156	3356530000	807725000	27075400				3.47156	19893700000	551300000	3.62851e+06		3.47156	4.71929e+06	711323000	23213200	539.646		3.47156	21652500	7.15566e+06	40004900	257807	1287.63		3.47156	20448600000	739256000	69072100
		3.48396	2571480000	936878000	1.45878e+06		3.48396	31108500	715816000	104579000	90147		3.48396	23645500	1.25465e+06	365805	2.95686e+06	275.513		3.48396	3509810000	851593000	28223100				3.48396	21085500000	563036000	3.82063e+06		3.48396	5.41738e+06	744274000	24031400	585.871		3.48396	22972000	8.15099e+06	45640300	273969	1430.65		3.48396	21652400000	773724000	77038700
		3.49635	2711460000	955413000	1.53731e+06		3.49635	35633300	752170000	109211000	92417.7		3.49635	24612000	1.39001e+06	408505	3.00337e+06	300.744		3.49635	3668410000	897108000	29414100				3.49635	22329100000	574817000	4.02003e+06		3.49635	6.21119e+06	778149000	24863400	637.477		3.49635	24354300	9.29343e+06	51966300	291625	1587.4		3.49635	22907900000	809225000	85907200
		3.50875	2856600000	974077000	1.61902e+06		3.50875	40777100	789557000	113951000	94753.1		3.50875	25602000	1.54164e+06	455360	3.05012e+06	327.937		3.50875	3832300000	944380000	30649400				3.50875	23625800000	586738000	4.22695e+06		3.50875	7.11207e+06	813031000	25712000	695.037		3.50875	25799700	10603600	59050000	310946	1759.22		3.50875	24216800000	845856000	95766000
		3.52115	3007180000	992884000	1.70399e+06		3.52115	46616100	827912000	118792000	97161.1		3.52115	26615000	1.71144e+06	506675	3.09706e+06	357.221		3.52115	4001770000	993418000	31930500				3.52115	24978100000	598691000	4.44151e+06		3.52115	8.13181e+06	848855000	26573200	759.118		3.52115	27309900	12103900	66976300	332109	1947.17		3.52115	25581200000	883561000	106724000
		3.53355	3163180000	1011700000	1.79219e+06		3.53355	53225300	867269000	123737000	99650		3.53355	27653000	1.90145e+06	562826	3.14455e+06	388.763		3.53355	4176670000	1044330000	33262200				3.53355	26385300000	610704000	4.66384e+06		3.53355	9.28345e+06	885659000	27451000	830.372		3.53355	28887900	13819800	75816500	355338	2152.72		3.53355	27000600000	922394000	118882000
		3.54595	3324780000	1030640000	1.88385e+06		3.54595	60692500	907590000	128781000	102229		3.54595	28713700	2.11372e+06	624118	3.19228e+06	422.675		3.54595	4357310000	1097170000	34644300				3.54595	27849600000	622796000	4.89406e+06		3.54595	10580700	923385000	28340100	909.44		3.54595	30534700	15780400	85669000	380865	2377.22		3.54595	28477300000	962306000	132367000
		3.55835	3491920000	1049660000	1.97891e+06		3.55835	69114300	948894000	133932000	104911		3.55835	29798100	2.3508e+06	690971	3.24059e+06	459.138		3.55835	4543560000	1152050000	36080900				3.55835	29372200000	634970000	5.13228e+06		3.55835	12039500	962104000	29245400	997.139		3.55835	32252000	18016200	96628300	408937	2622.15		3.55835	30012300000	1003390000	147308000
		3.57074	3664800000	1068720000	2.07746e+06		3.57074	78592300	991177000	139176000	107709		3.57074	30907900	2.6153e+06	763736	3.2895e+06	498.338		3.57074	4735600000	1209050000	37576900				3.57074	30954200000	647158000	5.37901e+06		3.57074	13675900	1001800000	30164100	1094.19		3.57074	34042800	20563600	108794000	439850	2889.17		3.57074	31606700000	1045640000	163844000
		3.58314	3843470000	1087880000	2.17967e+06		3.58314	89238300	1034430000	144528000	110633		3.58314	32040500	2.9099e+06	842861	3.339e+06	540.419		3.58314	4933530000	1268310000	39132800				3.58314	32597900000	659464000	5.63396e+06		3.58314	15507400	1042510000	31097500	1201.47		3.58314	35908200	23460300	122283000	473906	3180.03		3.58314	33263000000	1089120000	182128000
		3.59554	4028190000	1107110000	2.28559e+06		3.59554	101170000	1078610000	149973000	113693		3.59554	33197800	3.23789e+06	928804	3.38923e+06	585.593		3.59554	5137590000	1329870000	40754300				3.59554	34303300000	671819000	5.89766e+06		3.59554	17553500	1084090000	32043900	1319.88		3.59554	37848900	26750500	137211000	511451	3496.72		3.59554	34981000000	1133680000	202326000
		3.60794	4218550000	1126380000	2.39519e+06		3.60794	114519000	1123750000	155517000	116918		3.60794	34378700	3.60229e+06	1.02189e+06	3.44024e+06	634.062		3.60794	5347320000	1393900000	42443800				3.60794	36072400000	684208000	6.16965e+06		3.60794	19833700	1126730000	33003900	1450.37		3.60794	39868900	30480700	153707000	552858	3840.84		3.60794	36762800000	1179570000	224613000
		3.62034	4415050000	1145740000	2.5087e+06		3.62034	129424000	1169850000	161159000	120302		3.62034	35583600	4.00695e+06	1.12274e+06	3.49219e+06	686.032		3.62034	5563300000	1460550000	44206200				3.62034	37905300000	696653000	6.45063e+06		3.62034	22370000	1170320000	33976600	1593.86		3.62034	41970200	34704200	171908000	598513	4214.95		3.62034	38608400000	1226670000	249185000
		3.63274	4617790000	1165120000	2.62608e+06		3.63274	146026000	1216800000	166896000	123870		3.63274	36811100	4.45564e+06	1.23174e+06	3.54519e+06	741.745		3.63274	5785530000	1529850000	46044400				3.63274	39803200000	709164000	6.7408e+06		3.63274	25186100	1214950000	34963300	1751.6		3.63274	44152500	39474800	191948000	648836	4620.97		3.63274	40519100000	1275100000	276229000
		3.64514	4827040000	1184640000	2.7476e+06		3.64514	164495000	1264680000	172727000	127646		3.64514	38065800	4.95257e+06	1.34946e+06	3.59915e+06	801.439		3.64514	6014430000	1602030000	47967800				3.64514	41771100000	721741000	7.03997e+06		3.64514	28306000	1260520000	35962400	1924.57		3.64514	46418800	44861400	213997000	704384	5061.46		3.64514	42499800000	1324790000	305987000
		3.65753	5041670000	1204100000	2.87293e+06		3.65753	185003000	1313460000	178652000	131642		3.65753	39340900	5.50223e+06	1.4764e+06	3.6544e+06	865.405		3.65753	6248640000	1677240000	49974800				3.65753	43804800000	734321000	7.34816e+06		3.65753	31756200	1307030000	36974900	2114.08		3.65753	48772300	50929100	238222000	765620	5539.29		3.65753	44546500000	1375770000	338694000
		3.66993	5263140000	1223600000	3.00246e+06		3.66993	207728000	1363120000	184669000	135878		3.66993	40639100	6.10915e+06	1.61308e+06	3.71099e+06	933.841		3.66993	6489750000	1755650000	52073200				3.66993	45907000000	746960000	7.66565e+06		3.66993	35564500	1354540000	37999500	2321.4		3.66993	51212900	57753300	264792000	833125	6056.9		3.66993	46661600000	1428100000	374598000
		3.68233	5491020000	1243260000	3.13647e+06		3.68233	232863000	1413650000	190775000	140371		3.68233	41965300	6.7795e+06	1.76027e+06	3.7694e+06	1007.2		3.68233	6737420000	1837420000	54275500				3.68233	48082300000	759662000	7.99314e+06		3.68233	39760800	1403060000	39036800	2547.82		3.68233	53744200	65417400	293882000	907500	6617.43		3.68233	48849900000	1481860000	413958000
		3.69473	5725280000	1262910000	3.27445e+06		3.69473	260612000	1465060000	196971000	145151		3.69473	43310300	7.51739e+06	1.91824e+06	3.82919e+06	1085.62		3.69473	6991460000	1922790000	56576200				3.69473	50329400000	772439000	8.33036e+06		3.69473	44375700	1452530000	40086400	2794.79		3.69473	56367000	74012000	325705000	989428	7223.95		3.69473	51110200000	1537000000	457080000
		3.70713	5965910000	1282540000	3.41694e+06		3.70713	291201000	1517270000	203256000	150235		3.70713	44680300	8.3298e+06	2.08796e+06	3.89075e+06	1169.58		3.70713	7251870000	2011880000	58990000				3.70713	52645800000	785170000	8.6768e+06		3.70713	49443900	1502970000	41146800	3063.81		3.70713	59083500	83634600	360468000	1.07961e+06	7879.99		3.70713	53439700000	1593560000	504274000
		3.71953	6213420000	1302290000	3.56405e+06		3.71953	324860000	1570340000	209631000	155649		3.71953	46074200	9.22296e+06	2.2699e+06	3.9544e+06	1259.38		3.71953	7519270000	2104990000	61522700				3.71953	55038200000	797971000	9.03344e+06		3.71953	54997400	1554380000	42220200	3356.43		3.71953	61897100	94388800	398387000	1.17884e+06	8589.15		3.71953	55845200000	1651600000	555860000
		3.73192	6467440000	1322040000	3.7155e+06		3.73192	361830000	1624210000	216091000	161418		3.73192	47490300	10203200	2.46466e+06	4.02012e+06	1355.41		3.73192	7793190000	2202290000	64179600				3.73192	57508200000	810847000	9.4004e+06		3.73192	61072500	1606780000	43307500	3674.34		3.73192	64806200	106388000	439692000	1.28785e+06	9354.97		3.73192	58328400000	1711160000	612184000
		3.74432	6727670000	1341740000	3.87135e+06		3.74432	402393000	1678900000	222639000	167572		3.74432	48929400	11277800	2.67303e+06	4.08814e+06	1458.07		3.74432	8073280000	2304100000	66969900				3.74432	60049400000	823687000	9.7768e+06		3.74432	67715700	1660170000	44404100	4019.42		3.74432	67815400	119758000	484627000	1.40763e+06	10182.1		3.74432	60882900000	1772300000	673618000
		3.75672	6995140000	1361530000	4.03205e+06		3.75672	446795000	1734410000	229276000	174139		3.75672	50392600	12455000	2.89574e+06	4.15884e+06	1567.89		3.75672	8360710000	2410650000	69903800				3.75672	62671100000	836630000	10164400		3.75672	74955600	1714440000	45510000	4392.91		3.75672	70927900	134639000	533470000	1.53913e+06	11074.1		3.75672	63517800000	1834910000	740587000
		3.76912	7269270000	1381360000	4.19763e+06		3.76912	495340000	1790650000	235992000	181141		3.76912	51877100	13742200	3.13334e+06	4.23214e+06	1685.2		3.76912	8654820000	2522160000	72986500				3.76912	65370000000	849553000	10561800		3.76912	82840500	1769710000	46628800	4797.35		3.76912	74144000	151169000	586485000	1.68328e+06	12036.8		3.76912	66230100000	1899190000	813494000
		3.78152	7550510000	1401240000	4.36808e+06		3.78152	548287000	1847580000	242779000	188605		3.78152	53384800	15148200	3.38687e+06	4.30843e+06	1810.59		3.78152	8956120000	2638840000	76230200				3.78152	68148200000	862528000	10970100		3.78152	91412700	1825840000	47758200	5234.25		3.78152	77464200	169503000	643961000	1.84131e+06	13075.2		3.78152	69021700000	1965020000	892782000
		3.79392	7838170000	1421050000	4.54322e+06		3.79392	606040000	1905270000	249651000	196583		3.79392	54915100	16682700	3.65695e+06	4.38791e+06	1944.6		3.79392	9263770000	2761150000	79644700				3.79392	71006300000	875512000	11388900		3.79392	100721000	1882920000	48897300	5705.9		3.79392	80893800	189806000	706188000	2.01426e+06	14193.2		3.79392	71893200000	2032540000	978916000
		3.80631	8132720000	1440880000	4.72326e+06		3.80631	668850000	1963850000	256605000	205091		3.80631	56467600	18354600	3.9444e+06	4.47079e+06	2087.75		3.80631	9578320000	2889510000	83239400				3.80631	73944500000	888526000	11818500		3.80631	110817000	1941040000	50047900	6214.51		3.80631	84429800	212268000	773456000	2.20345e+06	15398		3.80631	74844800000	2101910000	1072370000
		3.81871	8434370000	1460800000	4.90839e+06		3.81871	737127000	2023020000	263648000	214170		3.81871	58042700	20174700	4.25002e+06	4.55734e+06	2240.65		3.81871	9900080000	3024010000	87027000				3.81871	76968500000	901566000	12258700		3.81871	121748000	2000110000	51208700	6762.29		3.81871	88082800	237080000	846163000	2.41019e+06	16695.5		3.81871	77882400000	2173080000	1173750000
		3.83111	8742940000	1480680000	5.09866e+06		3.83111	811203000	2082790000	270755000	223858		3.83111	59636500	22154000	4.57472e+06	4.64788e+06	2403.98		3.83111	10228700000	3164970000	91015600				3.83111	80072200000	914614000	12710600		3.83111	133564000	2060090000	52379400	7351.53		3.83111	91847300	264440000	924612000	2.63596e+06	18091.2		3.83111	80999600000	2246040000	1283550000
		3.84351	9058370000	1500540000	5.29396e+06		3.84351	891484000	2143380000	277936000	234189		3.84351	61256800	24302800	4.91943e+06	4.74266e+06	2578.42		3.84351	10564200000	3313040000	95224200				3.84351	83260500000	927691000	13173100		3.84351	146320000	2120820000	53557900	7984.27		3.84351	95730600	294575000	1009200000	2.88211e+06	19593.3		3.84351	84201300000	2320700000	1402410000
		3.85591	9381320000	1520420000	5.4947e+06		3.85591	978353000	2204590000	285201000	245204		3.85591	62897700	26634200	5.28501e+06	4.84179e+06	2764.68		3.85591	10907200000	3468390000	99661500				3.85591	86532600000	940757000	13646600		3.85591	160074000	2182600000	54747600	8663.67		3.85591	99732200	327719000	1100270000	3.15037e+06	21208.5		3.85591	87487000000	2397430000	1530890000
		3.86831	9711150000	1540280000	5.70073e+06		3.86831	1072220000	2266460000	292545000	256953		3.86831	64557600	29160400	5.672e+06	4.94611e+06	2963.57		3.86831	11257100000	3631480000	104339000				3.86831	89891700000	953825000	14132500		3.86831	174886000	2245350000	55948300	9392.24		3.86831	103856000	364111000	1198190000	3.44231e+06	22944.6		3.86831	90859700000	2476190000	1669620000
		3.88071	10047900000	1560230000	5.91199e+06		3.88071	1173550000	2329020000	299942000	269463		3.88071	66239400	31894700	6.08194e+06	5.05542e+06	3175.86		3.88071	11614000000	3802780000	109275000				3.88071	93340700000	966956000	14629000		3.88071	190820000	2308970000	57155600	10172.3		3.88071	108106000	404068000	1303450000	3.75992e+06	24810.6		3.88071	94322300000	2556960000	1819410000
		3.8931	10391100000	1580030000	6.1287e+06		3.8931	1282730000	2392170000	307430000	282785		3.8931	67941300	34850800	6.51576e+06	5.17012e+06	3402.45		3.8931	11977200000	3982610000	114481000				3.8931	96872000000	980093000	15136800		3.8931	207934000	2373330000	58371100	11006.7		3.8931	112483000	447809000	1416370000	4.10485e+06	26814.1		3.8931	97867300000	2639650000	1980790000
		3.9055	10742800000	1599930000	6.35098e+06		3.9055	1400260000	2455850000	314979000	296961		3.9055	69665400	38043700	6.97386e+06	5.29071e+06	3644.3		3.9055	12349100000	4171390000	119977000				3.9055	100496000000	993257000	15657100		3.9055	226297000	2438750000	59597800	11899		3.9055	116995000	495689000	1537590000	4.47951e+06	28967.5		3.9055	101505000000	2724660000	2154780000
		3.9179	11101100000	1619800000	6.57877e+06		3.9179	1526650000	2520170000	322598000	312045		3.9179	71412500	41489400	7.45789e+06	5.41764e+06	3902.41		3.9179	12727500000	4369730000	125781000				3.9179	104204000000	1006330000	16188300		3.9179	245973000	2504990000	60831700	12850.9		3.9179	121640000	548008000	1667370000	4.88564e+06	31278.1		3.9179	105227000000	2811810000	2341930000
		3.9303	11466300000	1639620000	6.81223e+06		3.9303	1662350000	2585030000	330282000	328081		3.9303	73178600	45202400	7.96847e+06	5.551e+06	4177.79		3.9303	13112800000	4577990000	131905000				3.9303	108003000000	1019500000	16731300		3.9303	267039000	2572050000	62073300	13866.9		3.9303	126417000	605071000	1806160000	5.32515e+06	33755.5		3.9303	109040000000	2901170000	2543000000
		3.9427	11838900000	1659410000	7.05129e+06		3.9427	1807880000	2650470000	338036000	345118		3.9427	74963100	49198600	8.5068e+06	5.69127e+06	4471.48		3.9427	13505400000	4796730000	138364000				3.9427	111891000000	1032620000	17286600		3.9427	289557000	2639960000	63322300	14949.4		3.9427	131347000	667307000	1954800000	5.80138e+06	36415.2		3.9427	112941000000	2992850000	2759290000
		3.9551	12218600000	1679220000	7.29615e+06		3.9551	1963840000	2716460000	345850000	363216		3.9551	76766900	53497100	9.07366e+06	5.83889e+06	4784.61		3.9551	13905100000	5026520000	145181000				3.9551	115876000000	1045740000	17854300		3.9551	313609000	2708760000	64582600	16101.9		3.9551	136424000	735080000	2113380000	6.3162e+06	39267.7		3.9551	116940000000	3086970000	2991240000
		3.96749	12605100000	1699030000	7.54698e+06		3.96749	2130700000	2782940000	353731000	382413		3.96749	78589700	58114800	9.67064e+06	5.99422e+06	5118.53		3.96749	14311700000	5267750000	152374000				3.96749	119953000000	1058900000	18433500		3.96749	339269000	2778360000	65846100	17327.6		3.96749	141653000	808746000	2282780000	6.87207e+06	42326.1		3.96749	121031000000	3183500000	3240100000
		3.97989	12999400000	1718790000	7.80342e+06		3.97989	2309050000	2849920000	361674000	402773		3.97989	80436700	63075500	10298900	6.15814e+06	5474.85		3.97989	14726000000	5521050000	159975000				3.97989	124114000000	1072040000	19024800		3.97989	366614000	2848780000	67115400	18630.1		3.97989	147046000	888769000	2463240000	7.47199e+06	45601.6		3.97989	125205000000	3282530000	3506570000
		3.99229	13400600000	1738490000	8.06573e+06		3.99229	2499510000	2917440000	369677000	424355		3.99229	82298700	68391800	10958900	6.3304e+06	5854.33		3.99229	15147200000	5787040000	167986000				3.99229	128378000000	1085180000	19628800		3.99229	395727000	2920070000	68396400	20012.9		3.99229	152603000	975583000	2655680000	8.11865e+06	49111.3		3.99229	129482000000	3384220000	3792040000
		4.00469	13809600000	1758170000	8.33469e+06		4.00469	2702710000	2985430000	377743000	447221		4.00469	84184600	74091500	11652200	6.51219e+06	6259.23		4.00469	15576100000	6066330000	176447000				4.00469	132732000000	1098320000	20244900		4.00469	426693000	2992120000	69683300	21480.1		4.00469	158330000	1069690000	2860460000	8.81546e+06	52870.1		4.00469	133851000000	3488520000	4097340000
		4.01709	14225100000	1777860000	8.60883e+06		4.01709	2919190000	3053880000	385864000	471412		4.01709	86086900	80190400	12381000	6.70349e+06	6690.39		4.01709	16011500000	6359410000	185368000				4.01709	137176000000	1111400000	20872800		4.01709	459583000	3064950000	70974800	23035.1		4.01709	164256000	1171550000	3078150000	9.56513e+06	56894.5		4.01709	138308000000	3595540000	4423570000
		4.02949	14648200000	1797490000	8.88974e+06		4.02949	3149570000	3122790000	394045000	497013		4.02949	88013000	86711200	13144500	6.90492e+06	7149.82		4.02949	16454500000	6666900000	194781000				4.02949	141721000000	1124550000	21514200		4.02949	494501000	3138720000	72275000	24682		4.02949	170373000	1281700000	3309590000	10371300	61202.6		4.02949	142867000000	3705520000	4772090000
		4.04188	15078000000	1817090000	9.17631e+06		4.04188	3394350000	3191920000	402263000	524043		4.04188	89952200	93678400	13945100	7.11696e+06	7639.04		4.04188	16904200000	6989060000	204700000				4.04188	146357000000	1137650000	22167400		4.04188	531538000	3213000000	73577900	26423.9		4.04188	176700000	1400690000	3555290000	11237400	65810.4		4.04188	147516000000	3818140000	5143980000
		4.05428	15515500000	1836660000	9.46958e+06		4.05428	3654800000	3261540000	410567000	552627		4.05428	91910000	101119000	14784000	7.34034e+06	8160.09		4.05428	17361600000	7327470000	215161000				4.05428	151092000000	1150730000	22833300		4.05428	570766000	3288340000	74891300	28267.2		4.05428	183253000	1529070000	3815990000	12166100	70739.7		4.05428	152265000000	3934020000	5540550000
		4.06668	15960300000	1856160000	9.76852e+06		4.06668	3931260000	3331870000	418935000	582818		4.06668	93887700	109052000	15662100	7.57546e+06	8714.89		4.06668	17826200000	7682650000	226186000				4.06668	155924000000	1163790000	23512200		4.06668	612281000	3364270000	76207500	30213.3		4.06668	190042000	1667390000	4092230000	13162600	76008.9		4.06668	157111000000	4052790000	5962900000
		4.07908	16412100000	1875670000	10074100		4.07908	4223840000	3402120000	427305000	614621		4.07908	95883400	117503000	16580900	7.82276e+06	9305.14		4.07908	18297800000	8053880000	237799000				4.07908	160848000000	1176870000	24203400		4.07908	656191000	3440700000	77526900	32267.2		4.07908	197098000	1816420000	4384950000	14230000	81643		4.07908	162050000000	4174450000	6412780000
		4.09148	16870700000	1895090000	10386000		4.09148	4534190000	3473090000	435758000	648192		4.09148	97895200	126499000	17541400	8.08314e+06	9933.46		4.09148	18776200000	8443690000	250029000				4.09148	165877000000	1189910000	24908200		4.09148	702618000	3518280000	78858000	34435.6		4.09148	204432000	1976700000	4694650000	15372200	87664.5		4.09148	167092000000	4299790000	6891240000
		4.10388	17336800000	1914490000	10704500		4.10388	4862680000	3544240000	444270000	683557		4.10388	99932900	136076000	18545900	8.35736e+06	10602		4.10388	19262000000	8851880000	262922000				4.10388	171001000000	1202950000	25625200		4.10388	751577000	3596340000	80186600	36718.4		4.10388	212085000	2149010000	5022340000	16594300	94093.6		4.10388	172230000000	4428140000	7400130000
		4.11628	17809800000	1933840000	11029200		4.11628	5209820000	3615790000	452824000	720759		4.11628	101985000	146251000	19594400	8.64501e+06	11312.7		4.11628	19754700000	9279160000	276487000				4.11628	176221000000	1215950000	26355200		4.11628	803272000	3675240000	81527900	39125.9		4.11628	220071000	2333920000	5368270000	17899900	100959		4.11628	177463000000	4560080000	7940260000
		4.12867	18290000000	1953130000	11360700		4.12867	5576910000	3687730000	461432000	759942		4.12867	104052000	157060000	20688900	8.94787e+06	12068.4		4.12867	20254500000	9726830000	290762000				4.12867	181543000000	1228950000	27098000		4.12867	857713000	3754730000	82867600	41657.9		4.12867	228434000	2532280000	5734090000	19293500	108288		4.12867	182799000000	4695360000	8514210000
		4.14107	18777600000	1972390000	11698100		4.14107	5964100000	3759790000	470074000	801132		4.14107	106146000	168528000	21830600	9.26638e+06	12872		4.14107	20761700000	10194800000	305784000				4.14107	186959000000	1241910000	27853500		4.14107	915043000	3834940000	84213400	44321.9		4.14107	237217000	2744830000	6119600000	20780400	116112		4.14107	188229000000	4834240000	9122540000
		4.15347	19271300000	1991550000	12042500		4.15347	6372330000	3832110000	478748000	844382		4.15347	108251000	180687000	23020900	9.60069e+06	13725.4		4.15347	21274900000	10684000000	321574000				4.15347	192471000000	1254830000	28621800		4.15347	975407000	3915920000	85564800	47121.9		4.15347	246464000	2972420000	6526430000	22365600	124458		4.15347	193754000000	4976940000	9767810000
		4.16587	19773100000	2010710000	12393800		4.16587	6802900000	3904840000	487493000	889845		4.16587	110377000	193573000	24261500	9.95177e+06	14632.4		4.16587	21796200000	11196100000	338178000				4.16587	198091000000	1267780000	29405100		4.16587	1038850000	3997490000	86920600	50061.5		4.16587	256226000	3215720000	6955020000	24053800	133354		4.16587	199388000000	5123310000	10451200000
		4.17827	20282500000	2029900000	12752100		4.17827	7256130000	3977920000	496271000	937562		4.17827	112523000	207217000	25553500	10320700	15595.3		4.17827	22325200000	11731300000	355629000				4.17827	203809000000	1280660000	30199700		4.17827	1105530000	4079570000	88277000	53148.3		4.17827	266566000	3475900000	7406630000	25850600	142839		4.17827	205120000000	5273440000	11175100000
		4.19067	20796900000	2048810000	13115900		4.19067	7733180000	4051060000	505086000	987595		4.19067	114685000	221644000	26896200	10707200	16617.6		4.19067	22858800000	12290300000	373949000				4.19067	209626000000	1293530000	31007800		4.19067	1175490000	4162440000	89639600	56386.3		4.19067	277553000	3753780000	7881590000	27761000	152952		4.19067	210950000000	5427630000	11940800000
		4.20306	21320000000	2067880000	13487600		4.20306	8234420000	4124500000	513947000	1.04003e+06		4.20306	116873000	236906000	28296900	11113400	17703		4.20306	23401300000	12873900000	393207000				4.20306	215553000000	1306430000	31830600		4.20306	1248920000	4245970000	91009900	59780.9		4.20306	289292000	4049990000	8380930000	29791100	163723		4.20306	216891000000	5585970000	12750200000
		4.21546	21848400000	2086780000	13865800		4.21546	8761310000	4198210000	522861000	1.09499e+06		4.21546	119074000	253016000	29751000	11538600	18853.8		4.21546	23949000000	13483500000	413399000				4.21546	221581000000	1319270000	32666600		4.21546	1325860000	4329950000	92371200	63334.8		4.21546	301840000	4365650000	8905770000	31945900	175197		4.21546	222933000000	5748250000	13605400000
		4.22786	22383300000	2105600000	14249800		4.22786	9314420000	4272000000	531781000	1.15251e+06		4.22786	121303000	270040000	31262100	11985200	20075.6		4.22786	24503100000	14119400000	434611000				4.22786	227682000000	1332030000	33513800		4.22786	1406510000	4414700000	93743700	67058.2		4.22786	315310000	4702040000	9457170000	34233800	187411		4.22786	229047000000	5915020000	14508900000
		4.24026	22928700000	2124380000	14642300		4.24026	9894520000	4346030000	540764000	1.21271e+06		4.24026	123549000	287983000	32832600	12452500	21370.5		4.24026	25067700000	14782500000	456839000				4.24026	233906000000	1344760000	34374000		4.24026	1490900000	4499870000	95117100	70952.3		4.24026	329830000	5059700000	10035300000	36657400	200403		4.24026	235285000000	6085960000	15461700000
		4.25266	23479000000	2143180000	15041000		4.25266	10502400000	4420230000	549771000	1.27566e+06		4.25266	125812000	306893000	34462000	12941400	22741.9		4.25266	25637200000	15473700000	480131000				4.25266	240232000000	1357500000	35248500		4.25266	1579190000	4585720000	96494700	75025.3		4.25266	345563000	5440460000	10642500000	39226900	214244		4.25266	241624000000	6261490000	16467900000
		4.26506	24035500000	2161750000	15446600		4.26506	11139700000	4494660000	558821000	1.34148e+06		4.26506	128105000	326832000	36153700	13454100	24196.4		4.26506	26212700000	16194500000	504569000				4.26506	246660000000	1370220000	36137500		4.26506	1671510000	4672130000	97876800	79281.6		4.26506	362609000	5844480000	11278300000	41945800	228950		4.26506	248066000000	6441590000	17527500000
		4.27745	24597100000	2180380000	15858800		4.27745	11806100000	4569090000	567898000	1.41022e+06		4.27745	130413000	347804000	37907000	13989800	25736.3		4.27745	26793300000	16944500000	530139000				4.27745	253173000000	1382830000	37036900		4.27745	1767980000	4759060000	99258000	83725.8		4.27745	381180000	6273570000	11944500000	44823000	244587		4.27745	254593000000	6626380000	18644300000
		4.28985	25167200000	2198820000	16278600		4.28985	12503600000	4643580000	577015000	1.48196e+06		4.28985	132749000	369874000	39726100	14550300	27366.5		4.28985	27382300000	17725700000	556927000				4.28985	259806000000	1395470000	37953300		4.28985	1868700000	4846460000	100644000	88369.8		4.28985	401477000	6728670000	12641900000	47863300	261211		4.28985	261239000000	6815890000	19820200000
		4.30225	25744400000	2217230000	16704800		4.30225	13232900000	4718450000	586172000	1.55683e+06		4.30225	135113000	393072000	41610100	15136400	29093		4.30225	27978300000	18539100000	584961000				4.30225	266518000000	1408050000	38880300		4.30225	1973790000	4934820000	102027000	93210.6		4.30225	423710000	7211060000	13371600000	51076900	278874		4.30225	267965000000	7010730000	21057800000
		4.31465	26326900000	2235660000	17138500		4.31465	13994800000	4793260000	595330000	1.63493e+06		4.31465	137500000	417455000	43562400	15748900	30919.5		4.31465	28579700000	19385100000	614297000				4.31465	273365000000	1420640000	39823800		4.31465	2083330000	5023200000	103417000	98260.4		4.31465	448119000	7721710000	14134700000	54467600	297622		4.31465	274826000000	7210040000	22359300000
		4.32705	26916800000	2254020000	17579700		4.32705	14790300000	4868440000	604523000	1.71631e+06		4.32705	139912000	443046000	45582000	16388200	32851.2		4.32705	29188400000	20265000000	644960000				4.32705	280276000000	1433150000	40778000		4.32705	2197550000	5112220000	104805000	103521		4.32705	475029000	8262450000	14932800000	58047600	317551		4.32705	281750000000	7414670000	23728600000
		4.33945	27513500000	2272310000	18028300		4.33945	15620300000	4943450000	613761000	1.80109e+06		4.33945	142355000	469908000	47673900	17056000	34894.3		4.33945	29803800000	21179300000	677028000				4.33945	287320000000	1445610000	41746600		4.33945	2316510000	5201520000	106195000	109002		4.33945	504718000	8834410000	15765800000	61820800	338699		4.33945	288807000000	7624330000	25167100000
		4.35185	28116900000	2290450000	18483100		4.35185	16485900000	5018470000	623021000	1.88941e+06		4.35185	144825000	498077000	49837000	17752800	37053.9		4.35185	30425800000	22129300000	710529000				4.35185	294447000000	1458120000	42728600		4.35185	2440430000	5292080000	107590000	114713		4.35185	537546000	9438310000	16635500000	65795300	361122		4.35185	295947000000	7840220000	26677500000
		4.36424	28724800000	2308420000	18944200		4.36424	17387500000	5093630000	632312000	1.98128e+06		4.36424	147330000	527588000	52072000	18478900	39334.3		4.36424	31052100000	23115400000	745507000				4.36424	301678000000	1470420000	43723700		4.36424	2569210000	5382330000	108982000	120649		4.36424	573927000	10076000000	17542900000	69981700	384907		4.36424	303192000000	8060640000	28263100000
		4.37664	29341000000	2326550000	19414000		4.37664	18327300000	5168870000	641637000	2.07689e+06		4.37664	149868000	558513000	54385000	19237100	41744.6		4.37664	31686900000	24139900000	782045000				4.37664	309018000000	1482800000	44732800		4.37664	2703060000	5472920000	110371000	126819		4.37664	614296000	10749100000	18489100000	74386300	410137		4.37664	310545000000	8286470000	29927300000
		4.38904	29962700000	2344390000	19890400		4.38904	19304500000	5243950000	650943000	2.17622e+06		4.38904	152446000	590897000	56772700	20026600	44289.1		4.38904	32327000000	25201500000	820186000				4.38904	316444000000	1495050000	45755000		4.38904	2842160000	5564330000	111764000	133234		4.38904	659143000	11459200000	19475100000	79018900	436880		4.38904	317985000000	8518380000	31672900000
		4.40144	30590000000	2362190000	20374200		4.40144	20321500000	5319280000	660293000	2.27946e+06		4.40144	155059000	624744000	59233500	20848600	46973.9		4.40144	32972600000	26303400000	859933000				4.40144	323984000000	1507350000	46790600		4.40144	2986950000	5656140000	113161000	139910		4.40144	709022000	12207600000	20502800000	83888500	465213		4.40144	325538000000	8756390000	33503800000
		4.41384	31224700000	2379980000	20865900		4.41384	21379600000	5394570000	669686000	2.38678e+06		4.41384	157715000	660137000	61779300	21704800	49807.4		4.41384	33625500000	27446200000	901386000				4.41384	331618000000	1519570000	47839200		4.41384	3137020000	5748510000	114557000	146836		4.41384	764534000	12995400000	21572000000	89001400	495221		4.41384	333186000000	9000230000	35421400000
		4.42624	31865100000	2397680000	21364300		4.42624	22479200000	5470050000	679111000	2.49819e+06		4.42624	160414000	697148000	64405300	22596500	52795.6		4.42624	34284100000	28630800000	944617000				4.42624	339357000000	1531740000	48902800		4.42624	3292490000	5840850000	115947000	154022		4.42624	826349000	13824700000	22685100000	94371700	526999		4.42624	340938000000	9249430000	37431000000
		4.43863	32511300000	2415340000	21869400		4.43863	23619800000	5545120000	688500000	2.61369e+06		4.43863	163164000	735787000	67112500	23523400	55948		4.43863	34948500000	29856000000	989643000				4.43863	347200000000	1543890000	49979600		4.43863	3454110000	5934090000	117346000	161485		4.43863	895243000	14696900000	23843000000	100002000	560639		4.43863	348794000000	9505710000	39535700000
		4.45103	33164000000	2432790000	22383100		4.45103	24803500000	5620310000	697926000	2.7335e+06		4.45103	165963000	776101000	69905600	24486800	59268.4		4.45103	35619100000	31124500000	1036520000				4.45103	355138000000	1556030000	51069300		4.45103	3621520000	6027380000	118741000	169219		4.45103	971992000	15613500000	25046200000	105907000	596231		4.45103	356745000000	9767810000	41738200000
		4.46343	33822500000	2450300000	22903300		4.46343	26033800000	5695500000	707375000	2.85775e+06		4.46343	168821000	818209000	72781400	25489200	62770.2		4.46343	36295700000	32439600000	1085360000				4.46343	363173000000	1568050000	52172100		4.46343	3794620000	6120940000	120130000	177233		4.46343	1057550000	16576200000	26296300000	112097000	633864		4.46343	364793000000	10035900000	44042800000
		4.47583	34486800000	2467650000	23430900		4.47583	27308300000	5770830000	716866000	2.98663e+06		4.47583	171737000	862084000	75745500	26530200	66456		4.47583	36977900000	33799000000	1136160000				4.47583	371310000000	1579980000	53287500		4.47583	3974200000	6215080000	121525000	185543		4.47583	1152870000	17587000000	27594900000	118577000	673703		4.47583	372943000000	10311000000	46454100000
		4.48823	35157300000	2484920000	23966600		4.48823	28628600000	5845780000	726337000	3.11993e+06		4.48823	174712000	907805000	78796100	27610600	70335.6		4.48823	37666200000	35203800000	1188990000				4.48823	379545000000	1591920000	54417200		4.48823	4160060000	6309600000	122920000	194149		4.48823	1259090000	18647200000	28943800000	125361000	715756		4.48823	381191000000	10592800000	48976200000
		4.50063	35832400000	2502060000	24508400		4.50063	29997800000	5920900000	735857000	3.25812e+06		4.50063	177771000	955486000	81942700	28734100	74425.1		4.50063	38359000000	36657800000	1244010000				4.50063	387890000000	1603840000	55561300		4.50063	4352210000	6404220000	124306000	203052		4.50063	1377410000	19759300000	30340500000	132460000	760239		4.50063	389549000000	10880900000	51610400000
		4.51302	36515000000	2519190000	25058800		4.51302	31413800000	5995660000	745347000	3.40097e+06		4.51302	180895000	1005050000	85172300	29897100	78719.5		4.51302	39059200000	38158200000	1301090000				4.51302	396319000000	1615710000	56717500		4.51302	4550990000	6499430000	125700000	212279		4.51302	1509160000	20924500000	31791200000	139878000	807235		4.51302	397991000000	11176300000	54365600000
		4.52542	37202200000	2536180000	25615700		4.52542	32881400000	6070660000	754896000	3.54893e+06		4.52542	184095000	1056680000	88501000	31105700	83243.6		4.52542	39764000000	39710500000	1360460000				4.52542	404865000000	1627480000	57888200		4.52542	4756230000	6594740000	127096000	221813		4.52542	1655750000	22143500000	33294900000	147634000	856838		4.52542	406551000000	11478300000	57242600000
		4.53782	37895000000	2553090000	26180600		4.53782	34397700000	6145430000	764433000	3.70194e+06		4.53782	187390000	1110380000	91921900	32358200	87998.5		4.53782	40474300000	41311300000	1422140000				4.53782	413497000000	1639270000	59072500		4.53782	4968350000	6690360000	128477000	231666		4.53782	1818790000	23420700000	34853100000	155735000	909207		4.53782	415195000000	11787400000	60249300000
		4.55022	38593500000	2569910000	26752400		4.55022	35966200000	6220030000	773979000	3.85998e+06		4.55022	190790000	1166210000	95439500	33656300	92997.3		4.55022	41190200000	42964000000	1486190000				4.55022	422221000000	1650910000	60268300		4.55022	5187350000	6786320000	129868000	241859		4.55022	2000060000	24757300000	36467900000	164193000	964492		4.55022	423932000000	12103800000	63390400000
		4.56262	39296800000	2586630000	27332000		4.56262	37586900000	6294500000	783529000	4.02331e+06		4.56262	194274000	1224200000	99052600	35000800	98247.8		4.56262	41910800000	44668900000	1552630000				4.56262	431051000000	1662560000	61477600		4.56262	5413470000	6882470000	131254000	252385		4.56262	2201240000	26153000000	38136000000	173009000	1.02276e+06		4.56262	432776000000	12427400000	66664200000
		4.57502	40006100000	2603290000	27918700		4.57502	39260200000	6368820000	793084000	4.19191e+06		4.57502	197884000	1284420000	102766000	36393100	103764		4.57502	42637400000	46426300000	1621570000				4.57502	439982000000	1674180000	62701700		4.57502	5646750000	6979050000	132638000	263259		4.57502	2424730000	27614000000	39866800000	182219000	1.0843e+06		4.57502	441719000000	12758700000	70088800000
		4.58742	40721000000	2619860000	28512500		4.58742	40989000000	6443100000	802665000	4.36614e+06		4.58742	201609000	1347030000	106583000	37834300	109557		4.58742	43369400000	48239200000	1693170000				4.58742	449009000000	1685720000	63936700		4.58742	5887270000	7075540000	134020000	274483		4.58742	2672450000	29138000000	41653900000	191810000	1.14916e+06		4.58742	450758000000	13097100000	73657300000
		4.59981	41441200000	2636320000	29114500		4.59981	42773100000	6517120000	812260000	4.54595e+06		4.59981	205455000	1411880000	110496000	39326000	115638		4.59981	44106600000	50107000000	1767270000				4.59981	458124000000	1697190000	65187800		4.59981	6135260000	7172960000	135407000	286058		4.59981	2946850000	30727800000	43501200000	201796000	1.21746e+06		4.59981	459886000000	13443900000	77378900000
		4.61221	42166200000	2652740000	29724100		4.61221	44613300000	6591070000	821859000	4.73139e+06		4.61221	209454000	1479210000	114513000	40868000	122013		4.61221	44848700000	52031000000	1844170000				4.61221	467325000000	1708630000	66447000		4.61221	6390850000	7270180000	136782000	298007		4.61221	3250740000	32387200000	45412000000	212209000	1.2895e+06		4.61221	469100000000	13798100000	81263500000
		4.62461	42894100000	2668980000	30340200		4.62461	46511900000	6665200000	831413000	4.92277e+06		4.62461	213598000	1548980000	118633000	42463200	128714		4.62461	45593400000	54013400000	1923810000				4.62461	476656000000	1719970000	67725800		4.62461	6654090000	7367220000	138162000	310328		4.62461	3586800000	34117700000	47386700000	223041000	1.36536e+06		4.62461	478443000000	14159800000	85315600000
		4.63701	43630600000	2685190000	30964500		4.63701	48467100000	6738410000	841011000	5.11983e+06		4.63701	217904000	1621330000	122861000	44112000	135729		4.63701	46346800000	56051600000	2006340000				4.63701	486054000000	1731280000	69014400		4.63701	6924540000	7465120000	139532000	323029		4.63701	3958130000	35920300000	49423100000	234299000	1.44519e+06		4.63701	487854000000	14529500000	89537300000
		4.64941	44371200000	2701250000	31595800		4.64941	50481000000	6811840000	850597000	5.32311e+06		4.64941	222391000	1696280000	127194000	45815800	143094		4.64941	47104000000	58148800000	2091820000				4.64941	495580000000	1742570000	70315800		4.64941	7203810000	7562780000	140904000	336112		4.64941	4368020000	37798500000	51526600000	246018000	1.52928e+06		4.64941	497393000000	14907800000	93940600000
		4.66181	45116200000	2717280000	32234600		4.66181	52557600000	6885520000	860219000	5.53251e+06		4.66181	227068000	1773870000	131637000	47575500	150808		4.66181	47865700000	60308900000	2180300000				4.66181	505159000000	1753750000	71629900		4.66181	7490570000	7660640000	142275000	349592		4.66181	4820230000	39754000000	53697600000	258208000	1.61777e+06		4.66181	506985000000	15293800000	98531700000
		4.6742	45867600000	2733190000	32880800		4.6742	54697400000	6958320000	869797000	5.7481e+06		4.6742	231954000	1854140000	136195000	49392600	158892		4.6742	48633700000	62531300000	2271840000				4.6742	514840000000	1764900000	72958000		4.6742	7785490000	7758730000	143642000	363473		4.6742	5318380000	41789100000	55937100000	270860000	1.71082e+06		4.6742	516678000000	15688200000	103317000000
		4.6866	46620600000	2748990000	33534600		4.6866	56895700000	7031220000	879429000	5.97007e+06		4.6866	237059000	1937230000	140860000	51267600	167355		4.6866	49403100000	64812400000	2366580000				4.6866	524622000000	1776010000	74296700		4.6866	8088950000	7857370000	145007000	377764		4.6866	5866760000	43905600000	58245300000	283998000	1.80874e+06		4.6866	526473000000	16091700000	108303000000
		4.699	47380100000	2764680000	34195600		4.699	59159600000	7103920000	889012000	6.19849e+06		4.699	242398000	2023140000	145636000	53202200	176220		4.699	50179000000	67158800000	2464550000				4.699	534496000000	1787060000	75651300		4.699	8400590000	7955570000	146367000	392471		4.699	6469760000	46105900000	60624600000	297638000	1.91164e+06		4.699	536359000000	16502900000	113500000000
		4.7114	48144700000	2780340000	34864200		4.7114	61483900000	7176400000	898617000	6.43354e+06		4.7114	247995000	2111920000	150526000	55197400	185499		4.7114	50959900000	69565300000	2565830000				4.7114	544483000000	1798050000	77017300		4.7114	8720530000	8054060000	147727000	407595		4.7114	7132130000	48392000000	63074700000	311800000	2.01985e+06		4.7114	546358000000	16922700000	118913000000
		4.7238	48914000000	2795850000	35540100		4.7238	63876400000	7248590000	908213000	6.67528e+06		4.7238	253869000	2203700000	155532000	57254300	195207		4.7238	51745400000	72039800000	2670550000				4.7238	554533000000	1808940000	78395000		4.7238	9049320000	8152810000	149081000	423148		4.7238	7859400000	50766400000	65599000000	326474000	2.13345e+06		4.7238	556420000000	17351600000	124553000000
		4.7362	49688900000	2811350000	36223500		4.7362	66336200000	7320760000	917840000	6.924e+06		4.7362	260040000	2298490000	160657000	59374400	205369		4.7362	52536500000	74581700000	2778760000				4.7362	564710000000	1819890000	79791000		4.7362	9387370000	8252250000	150440000	439164		4.7362	8656770000	53231800000	68202800000	341701000	2.25291e+06		4.7362	566610000000	17790500000	130435000000
		4.74859	50468400000	2826720000	36916100		4.74859	68862500000	7392310000	927443000	7.17933e+06		4.74859	266526000	2396340000	165897000	61558900	215991		4.74859	53332100000	77189500000	2890540000				4.74859	574921000000	1830610000	81192100		4.74859	9733540000	8350860000	151787000	455602		4.74859	9529900000	55790300000	70877300000	357467000	2.37828e+06		4.74859	576833000000	18236600000	136557000000
		4.76099	51249800000	2841810000	37613400		4.76099	71454500000	7463870000	937037000	7.44182e+06		4.76099	273360000	2497370000	171257000	63809700	227101		4.76099	54129300000	79862900000	3006030000				4.76099	585251000000	1841300000	82605800		4.76099	10088700000	8449970000	153129000	472474		4.76099	10485100000	58442200000	73624800000	373795000	2.5099e+06		4.76099	587175000000	18692200000	142928000000
		4.77339	52035900000	2857040000	38319800		4.77339	74110900000	7534670000	946550000	7.7109e+06		4.77339	280554000	2601610000	176738000	66126300	238709		4.77339	54931200000	82599800000	3125270000				4.77339	595703000000	1852110000	84040600		4.77339	10452900000	8549000000	154470000	489821		4.77339	11529900000	61194200000	76456100000	390707000	2.64802e+06		4.77339	597639000000	19156900000	149574000000
		4.78579	52824700000	2872090000	39032400		4.78579	76843200000	7605750000	956121000	7.98781e+06		4.78579	288135000	2709060000	182340000	68511700	250842		4.78579	55735800000	85413000000	3248300000				4.78579	606188000000	1862680000	85481500		4.78579	10826500000	8648210000	155811000	507633		4.78579	12670700000	64044300000	79367200000	408214000	2.79302e+06		4.78579	608136000000	19631000000	156493000000
		4.79819	53619000000	2886900000	39751200		4.79819	79648000000	7676670000	965749000	8.27236e+06		4.79819	296160000	2820000000	188070000	70966600	263520		4.79819	56545700000	88298700000	3375460000				4.79819	616821000000	1873290000	86937800		4.79819	11209400000	8747520000	157146000	525911		4.79819	13915700000	66996900000	82358100000	426326000	2.94505e+06		4.79819	618782000000	20114600000	163700000000
		4.81059	54416400000	2901640000	40477900		4.81059	82521700000	7747210000	975306000	8.56399e+06		4.81059	304612000	2934200000	193915000	73488900	276744		4.81059	57358500000	91252800000	3506490000				4.81059	627487000000	1883770000	88403600		4.81059	11601300000	8846570000	158470000	544647		4.81059	15272700000	70055500000	85431200000	445060000	3.10449e+06		4.81059	629459000000	20606900000	171208000000
		4.82299	55220300000	2916630000	41213200		4.82299	85463100000	7816990000	984824000	8.86274e+06		4.82299	313554000	3051690000	199884000	76082900	290569		4.82299	58178200000	94273800000	3641500000				4.82299	638245000000	1894140000	89880300		4.82299	12003200000	8945960000	159800000	563889		4.82299	16750500000	73220000000	88588100000	464420000	3.27162e+06		4.82299	640229000000	21109500000	179026000000
		4.83538	56026600000	2931180000	41955600		4.83538	88480500000	7886930000	994385000	9.16962e+06		4.83538	323022000	3172960000	205989000	78753400	304986		4.83538	58999700000	97371000000	3781030000				4.83538	649146000000	1904640000	91377400		4.83538	12414700000	9045620000	161130000	583649		4.83538	18358600000	76492300000	91827500000	484429000	3.44678e+06		4.83538	651142000000	21622000000	187166000000
		4.84778	56838000000	2945830000	42705000		4.84778	91575000000	7956570000	1003940000	9.48439e+06		4.84778	333046000	3297860000	212218000	81497900	320045		4.84778	59826600000	100545000000	3924940000				4.84778	660052000000	1914960000	92875500		4.84778	12835800000	9145070000	162440000	603886		4.84778	20106600000	79878500000	95155200000	505108000	3.63032e+06		4.84778	662060000000	22143900000	195649000000
		4.86018	57653900000	2960310000	43462400		4.86018	94739200000	8025760000	1013450000	9.8068e+06		4.86018	343634000	3426160000	218570000	84312300	335735		4.86018	60657600000	103788000000	4073020000				4.86018	671126000000	1925240000	94396300		4.86018	13266700000	9244630000	163762000	624629		4.86018	22004900000	83378800000	98568600000	526447000	3.82253e+06		4.86018	673145000000	22675700000	204482000000
		4.87258	58471200000	2974560000	44226800		4.87258	97983400000	8094890000	1022980000	10137500		4.87258	354865000	3558280000	225057000	87208200	352118		4.87258	61489900000	107111000000	4225770000				4.87258	682208000000	1935360000	95920300		4.87258	13706900000	9343830000	165068000	645861		4.87258	24065300000	86995400000	102070000000	548481000	4.02389e+06		4.87258	684239000000	23216400000	213684000000
		4.88498	59290500000	2988690000	44997600		4.88498	101303000000	8163600000	1032490000	10476000		4.88498	366768000	3694290000	231679000	90181400	369196		4.88498	62324200000	110509000000	4383290000				4.88498	693429000000	1945480000	97463600		4.88498	14158500000	9443640000	166385000	667666		4.88498	26297300000	90731300000	105660000000	571211000	4.23453e+06		4.88498	695472000000	23769200000	223264000000
		4.89738	60115400000	3002800000	45774900		4.89738	104697000000	8232010000	1041970000	10822800		4.89738	379374000	3834040000	238426000	93232100	386991		4.89738	63164000000	113982000000	4545460000				4.89738	704698000000	1955630000	99012100		4.89738	14618400000	9542870000	167679000	689965		4.89738	28715800000	94589600000	109340000000	594677000	4.45521e+06		4.89738	706753000000	24329600000	233245000000
		4.90977	60946600000	3017090000	46563000		4.90977	108168000000	8299960000	1051440000	11177700		4.90977	392736000	3977550000	245304000	96362300	405528		4.90977	64010300000	117530000000	4712360000				4.90977	716078000000	1965690000	100578000		4.90977	15089800000	9642290000	168975000	712788		4.90977	31334700000	98571900000	113114000000	618855000	4.68589e+06		4.90977	718144000000	24901700000	243644000000
		4.92217	61778000000	3030900000	47354400		4.92217	111717000000	8367770000	1060920000	11541500		4.92217	406918000	4125220000	252315000	99573200	424856		4.92217	64856300000	121157000000	4884450000				4.92217	727531000000	1975570000	102155000		4.92217	15570900000	9742190000	170274000	736176		4.92217	34163700000	102679000000	116977000000	643796000	4.92727e+06		4.92217	729609000000	25484100000	254468000000
		4.93457	62612300000	3044770000	48153600		4.93457	115354000000	8435140000	1070350000	11913400		4.93457	421953000	4276720000	259468000	102868000	444978		4.93457	65705200000	124871000000	5061450000				4.93457	739050000000	1985480000	103740000		4.93457	16063100000	9841480000	171563000	760104		4.93457	37221900000	106918000000	120938000000	669492000	5.17988e+06		4.93457	741139000000	26076900000	265752000000
		4.94697	63449900000	3058470000	48959900		4.94697	119063000000	8501840000	1079780000	12293700		4.94697	437899000	4432440000	266752000	106245000	465931		4.94697	66557300000	128657000000	5243800000				4.94697	750663000000	1995360000	105341000		4.94697	16564800000	9940670000	172845000	784568		4.94697	40521500000	111285000000	124989000000	695934000	5.44365e+06		4.94697	752763000000	26679100000	277497000000
		4.95937	64292400000	3072070000	49773900		4.95937	122851000000	8569310000	1089230000	12683500		4.95937	454822000	4592260000	274173000	109709000	487749		4.95937	67414200000	132523000000	5431450000				4.95937	762352000000	2005120000	106952000		4.95937	17077000000	10040100000	174122000	809607		4.95937	44081100000	115785000000	129132000000	723183000	5.71953e+06		4.95937	764464000000	27292000000	289727000000
		4.97177	65138500000	3085740000	50597000		4.97177	126728000000	8635050000	1098590000	13081600		4.97177	472765000	4756250000	281733000	113256000	510452		4.97177	68274800000	136474000000	5624510000				4.97177	774131000000	2014770000	108576000		4.97177	17600500000	10138800000	175399000	835216		4.97177	47916100000	120422000000	133381000000	751231000	6.00773e+06		4.97177	776255000000	27915600000	302477000000
		4.98416	65985500000	3099170000	51425300		4.98416	130684000000	8701110000	1107990000	13488600		4.98416	491800000	4924460000	289427000	116891000	534066		4.98416	69136100000	140506000000	5823110000				4.98416	785989000000	2024470000	110210000		4.98416	18134600000	10238000000	176666000	861395		4.98416	52047600000	125203000000	137731000000	780113000	6.30896e+06		4.98416	788124000000	28550100000	315767000000
		4.99656	66837000000	3112530000	52260600		4.99656	134717000000	8767060000	1117350000	13904700		4.99656	511985000	5097000000	297269000	120615000	558638		4.99656	70001800000	144616000000	6027420000				4.99656	797890000000	2034000000	111852000		4.99656	18679200000	10337600000	177934000	888164		4.99656	56490000000	130121000000	142178000000	809802000	6.62343e+06		4.99656	800036000000	29195700000	329605000000
		5.00896	67691900000	3125850000	53103900		5.00896	138839000000	8832690000	1126700000	14330100		5.00896	533392000	5273970000	305239000	124426000	584187		5.00896	70870900000	148813000000	6237610000				5.00896	809919000000	2043530000	113515000		5.00896	19234800000	10436700000	179192000	915510		5.00896	61265700000	135184000000	146720000000	840334000	6.95162e+06		5.00896	812076000000	29851600000	344017000000
		5.02136	68547300000	3138870000	53953000		5.02136	143045000000	8897640000	1136040000	14764600		5.02136	556108000	5455130000	313359000	128329000	610782		5.02136	71740100000	153093000000	6453530000				5.02136	821969000000	2052960000	115177000		5.02136	19801700000	10535700000	180446000	943450		5.02136	66397700000	140393000000	151364000000	871757000	7.29456e+06		5.02136	824137000000	30518800000	359034000000
		5.03376	69407700000	3152020000	54809500		5.03376	147338000000	8962380000	1145380000	15208200		5.03376	580183000	5641150000	321615000	132327000	638369		5.03376	72614600000	157461000000	6675910000				5.03376	834134000000	2062410000	116855000		5.03376	20379400000	10634500000	181696000	972012		5.03376	71904100000	145748000000	156112000000	904013000	7.65217e+06		5.03376	836313000000	31196500000	374676000000
		5.04616	70269300000	3164930000	55672800		5.04616	151714000000	9026660000	1154660000	15661600		5.04616	605711000	5831690000	330022000	136416000	667101		5.04616	73489900000	161911000000	6904510000				5.04616	846374000000	2071720000	118553000		5.04616	20967700000	10733300000	182939000	1.00112e+06		5.04616	77814200000	151257000000	160966000000	937185000	8.02545e+06		5.04616	848564000000	31884900000	390982000000
		5.05856	71133800000	3177730000	56542700		5.05856	156175000000	9090240000	1163920000	16124000		5.05856	632764000	6026550000	338566000	140594000	696919		5.05856	74368100000	166445000000	7139170000				5.05856	858672000000	2081030000	120250000		5.05856	21567700000	10831900000	184178000	1.03087e+06		5.05856	84139600000	156923000000	165915000000	971237000	8.4147e+06		5.05856	860873000000	32584800000	407957000000
		5.07095	72002000000	3190550000	57420500		5.07095	160722000000	9154050000	1173210000	16596200		5.07095	661432000	6226190000	347253000	144872000	727900		5.07095	75250000000	171066000000	7380480000				5.07095	871054000000	2090220000	121960000		5.07095	22178800000	10930300000	185414000	1.06125e+06		5.07095	90923700000	162741000000	170980000000	1006250000	8.82061e+06		5.07095	873266000000	33295600000	425660000000
		5.08335	72871400000	3203200000	58304500		5.08335	165353000000	9217070000	1182430000	17078300		5.08335	691819000	6430770000	356101000	149246000	760075		5.08335	76132900000	175770000000	7628700000				5.08335	883524000000	2099330000	123686000		5.08335	22800900000	11028800000	186641000	1.09227e+06		5.08335	98177300000	168714000000	176142000000	1042100000	9.24389e+06		5.08335	885747000000	34017500000	444084000000
		5.09575	73745400000	3215800000	59196100		5.09575	170076000000	9280170000	1191630000	17570100		5.09575	723991000	6639760000	365065000	153715000	793468		5.09575	77020400000	180565000000	7883320000				5.09575	895984000000	2108440000	125420000		5.09575	23434700000	11126900000	187866000	1.12389e+06		5.09575	105936000000	174854000000	181417000000	1078960000	9.68475e+06		5.09575	898218000000	34750600000	463295000000
		5.10815	74620000000	3228270000	60095000		5.10815	174886000000	9342500000	1200810000	18071600		5.10815	758062000	6853870000	374189000	158284000	828151		5.10815	77908400000	185448000000	8145230000				5.10815	908663000000	2117460000	127165000		5.10815	24080000000	11225100000	189085000	1.15617e+06		5.10815	114229000000	181150000000	186797000000	1116760000	10144600		5.10815	910907000000	35495300000	483303000000
		5.12055	75496900000	3240610000	60999000		5.12055	179786000000	9404440000	1210000000	18583300		5.12055	794112000	7072750000	383470000	162951000	864132		5.12055	78798500000	190419000000	8414150000				5.12055	921243000000	2126370000	128924000		5.12055	24736600000	11323100000	190295000	1.18907e+06		5.12055	123079000000	187616000000	192289000000	1155560000	10623200		5.12055	923498000000	36251100000	504150000000
		5.13295	76372100000	3252860000	61909700		5.13295	184774000000	9466170000	1219140000	19105100		5.13295	832263000	7296700000	392871000	167719000	901458		5.13295	79686800000	195479000000	8690450000				5.13295	934007000000	2135290000	130690000		5.13295	25404600000	11420700000	191503000	1.22261e+06		5.13295	132531000000	194250000000	197889000000	1195340000	11122000		5.13295	936273000000	37018000000	525876000000
		5.14534	77252700000	3265010000	62827300		5.14534	189858000000	9527960000	1228280000	19637400		5.14534	872642000	7525510000	402452000	172588000	940195		5.14534	80580600000	200634000000	8974130000				5.14534	946788000000	2144130000	132466000		5.14534	26083300000	11518000000	192696000	1.25678e+06		5.14534	142607000000	201051000000	203601000000	1236110000	11641400		5.14534	949065000000	37795200000	548508000000
		5.15774	78137600000	3277120000	63751800		5.15774	195017000000	9588330000	1237340000	20178600		5.15774	915336000	7759480000	412173000	177562000	980375		5.15774	81478500000	205863000000	9265530000				5.15774	959691000000	2152840000	134249000		5.15774	26775700000	11616000000	193899000	1.29171e+06		5.15774	153346000000	208032000000	209426000000	1277890000	12182100		5.15774	961978000000	38586900000	572094000000
		5.17014	79025200000	3289130000	64684400		5.17014	200273000000	9648780000	1246390000	20730700		5.17014	960463000	7998490000	422023000	182635000	1.02201e+06		5.17014	82379100000	211189000000	9564630000				5.17014	972595000000	2161600000	136053000		5.17014	27478700000	11713300000	195088000	1.32722e+06		5.17014	164781000000	215183000000	215362000000	1320680000	12744900		5.17014	974892000000	39388400000	596660000000
		5.18254	79910900000	3300960000	65623000		5.18254	205621000000	9709070000	1255440000	21293500		5.18254	1008160000	8242740000	432044000	187817000	1.0652e+06		5.18254	83277500000	216607000000	9871820000				5.18254	985633000000	2170180000	137858000		5.18254	28195100000	11810500000	196278000	1.36345e+06		5.18254	176953000000	222509000000	221406000000	1364500000	13330400		5.18254	987941000000	40203300000	622246000000
		5.19494	80799400000	3312750000	66567100		5.19494	211061000000	9768760000	1264450000	21866700		5.19494	1058560000	8492120000	442201000	193104000	1.10995e+06		5.19494	84178700000	222116000000	10187100000				5.19494	998689000000	2178830000	139675000		5.19494	28919600000	11907100000	197447000	1.40026e+06		5.19494	189900000000	230018000000	227571000000	1409410000	13939400		5.19494	1001010000000	41025600000	648912000000
		5.20734	81694400000	3324420000	67518200		5.20734	216599000000	9828250000	1273470000	22450600		5.20734	1111760000	8746790000	452513000	198495000	1.15631e+06		5.20734	85086400000	227723000000	10510700000				5.20734	1011840000000	2187350000	141507000		5.20734	29660000000	12004400000	198629000	1.43787e+06		5.20734	203658000000	237710000000	233846000000	1455360000	14572900		5.20734	1014170000000	41864400000	676684000000
		5.21973	82587000000	3336010000	68475600		5.21973	222226000000	9887580000	1282460000	23046000		5.21973	1167920000	9006420000	462976000	203989000	1.20431e+06		5.21973	85991500000	233419000000	10842500000				5.21973	1025030000000	2195750000	143344000		5.21973	30410000000	12101000000	199790000	1.47613e+06		5.21973	218276000000	245575000000	240232000000	1502430000	15231800		5.21973	1027370000000	42712300000	705601000000
		5.23213	83479500000	3347470000	69439900		5.23213	227933000000	9945870000	1291380000	23650600		5.23213	1227200000	9271830000	473589000	209599000	1.25409e+06		5.23213	86896400000	239194000000	11183500000				5.23213	1038300000000	2204150000	145191000		5.23213	31171500000	12197200000	200951000	1.51508e+06		5.23213	233787000000	253644000000	246740000000	1550560000	15916400		5.23213	1040650000000	43571200000	735738000000
		5.24453	84373700000	3358820000	70410100		5.24453	233738000000	10004000000	1300270000	24266400		5.24453	1289760000	9542700000	484368000	215320000	1.30562e+06		5.24453	87802900000	245067000000	11533500000				5.24453	1051610000000	2212460000	147053000		5.24453	31944700000	12292900000	202104000	1.55466e+06		5.24453	250251000000	261894000000	253375000000	1599820000	16628100		5.24453	1053970000000	44441300000	767137000000
		5.25693	85272100000	3370120000	71387300		5.25693	239656000000	10062000000	1309210000	24894200		5.25693	1355700000	9818890000	495281000	221151000	1.35895e+06		5.25693	88713600000	251052000000	11892400000				5.25693	1064960000000	2220700000	148916000		5.25693	32732700000	12389300000	203266000	1.59506e+06		5.25693	267709000000	270331000000	260119000000	1650180000	17367800		5.25693	1067330000000	45326900000	799826000000
		5.26933	86174500000	3381330000	72371000		5.26933	245640000000	10119200000	1318050000	25531600		5.26933	1425130000	10100300000	506339000	227084000	1.41418e+06		5.26933	89628200000	257103000000	12260300000				5.26933	1078450000000	2228930000	150795000		5.26933	33530500000	12485000000	204410000	1.63611e+06		5.26933	286213000000	278961000000	266977000000	1701680000	18136100		5.26933	1080830000000	46221500000	833871000000
		5.28173	87072800000	3392430000	73360700		5.28173	251736000000	10176100000	1326880000	26180300		5.28173	1498420000	10387700000	517582000	233139000	1.47136e+06		5.28173	90538600000	263265000000	12638300000				5.28173	1091940000000	2237060000	152685000		5.28173	34340500000	12580300000	205533000	1.67785e+06		5.28173	305803000000	287795000000	273951000000	1754330000	18934000		5.28173	1094330000000	47128000000	869323000000
		5.29413	87976500000	3403460000	74355800		5.29413	257912000000	10232800000	1335680000	26840600		5.29413	1575500000	10680700000	528956000	239301000	1.53041e+06		5.29413	91454300000	269507000000	13026000000				5.29413	1105500000000	2245120000	154576000		5.29413	35162800000	12675300000	206670000	1.72028e+06		5.29413	326533000000	296812000000	281060000000	1808150000	19762600		5.29413	1107900000000	48046400000	906233000000
		5.30652	88880400000	3414330000	75360200		5.30652	264195000000	10289000000	1344480000	27512200		5.30652	1656740000	10979000000	540473000	245580000	1.59158e+06		5.30652	92370100000	275856000000	13423300000				5.30652	1119140000000	2253140000	156485000		5.30652	35997400000	12770200000	207799000	1.76352e+06		5.30652	348470000000	306038000000	288281000000	1863120000	20622700		5.30652	1121550000000	48977100000	944672000000
		5.31892	89781500000	3425130000	76366300		5.31892	270564000000	10344600000	1353200000	28194400		5.31892	1742170000	11283100000	552166000	251979000	1.65487e+06		5.31892	93283000000	282290000000	13831100000				5.31892	1132820000000	2261080000	158401000		5.31892	36843800000	12865700000	208922000	1.80747e+06		5.31892	371655000000	315452000000	295613000000	1919230000	21514700		5.31892	1135240000000	49920200000	984661000000
		5.33132	90686300000	3435820000	77384100		5.33132	277026000000	10400100000	1361910000	28888600		5.33132	1832030000	11592900000	563997000	258490000	1.72027e+06		5.33132	94199500000	288817000000	14249200000				5.33132	1146550000000	2268990000	160328000		5.33132	37703400000	12959500000	210036000	1.85214e+06		5.33132	396163000000	325090000000	303085000000	1976640000	22442200		5.33132	1148980000000	50874800000	1026340000000
		5.34372	91594500000	3446420000	78402100		5.34372	283591000000	10454700000	1370580000	29593300		5.34372	1926540000	11908600000	575988000	265117000	1.78789e+06		5.34372	95119400000	295446000000	14678000000				5.34372	1160350000000	2276830000	162262000		5.34372	38574000000	13054500000	211141000	1.89752e+06		5.34372	422051000000	334933000000	310671000000	2035280000	23403200		5.34372	1162790000000	51841600000	1069710000000
		5.35612	92501400000	3456940000	79429800		5.35612	290245000000	10509500000	1379200000	30310000		5.35612	2025850000	12229900000	588128000	271855000	1.85778e+06		5.35612	96037800000	302164000000	15117600000				5.35612	1174160000000	2284550000	164203000		5.35612	39457300000	13148400000	212243000	1.94367e+06		5.35612	449352000000	344963000000	318369000000	2094910000	24399800		5.35612	1176610000000	52820000000	1114800000000
		5.36852	93412400000	3467510000	80462100		5.36852	296997000000	10563200000	1387900000	31038400		5.36852	2130270000	12557000000	600410000	278724000	1.93005e+06		5.36852	96960400000	308980000000	15568300000				5.36852	1188080000000	2292270000	166154000		5.36852	40353100000	13242300000	213334000	1.99052e+06		5.36852	478179000000	355217000000	326198000000	2156060000	25433600		5.36852	1190540000000	53810700000	1161780000000
		5.38091	94322400000	3477610000	81501800		5.38091	303837000000	10617100000	1396430000	31778200		5.38091	2239870000	12890400000	612872000	285705000	2.00464e+06		5.38091	97881500000	315883000000	16030800000				5.38091	1202060000000	2299910000	168118000		5.38091	41261000000	13335400000	214420000	2.03821e+06		5.38091	508546000000	365671000000	334148000000	2218230000	26505200		5.38091	1204530000000	54812800000	1210610000000
		5.39331	95232400000	3487990000	82546500		5.39331	310782000000	10670400000	1405010000	32530300		5.39331	2354960000	13229200000	625481000	292804000	2.08176e+06		5.39331	98802900000	322890000000	16504600000				5.39331	1216060000000	2307490000	170088000		5.39331	42180600000	13428500000	215502000	2.08659e+06		5.39331	540579000000	376355000000	342234000000	2281860000	27617400		5.39331	1218540000000	55826600000	1261480000000
		5.40571	96140500000	3498140000	83597000		5.40571	317822000000	10723400000	1413530000	33292600		5.40571	2475740000	13574300000	638249000	300025000	2.1614e+06		5.40571	99722300000	329992000000	16990500000				5.40571	1230130000000	2315020000	172064000		5.40571	43113000000	13521300000	216578000	2.13571e+06		5.40571	574283000000	387232000000	350426000000	2346560000	28767100		5.40571	1232620000000	56853000000	1314320000000
		5.41811	97055800000	3508250000	84658000		5.41811	324952000000	10775400000	1422030000	34068200		5.41811	2602410000	13925200000	651159000	307373000	2.24367e+06		5.41811	100649000000	337184000000	17488400000				5.41811	1244280000000	2322540000	174057000		5.41811	44057800000	13614100000	217649000	2.1856e+06		5.41811	609794000000	398344000000	358757000000	2412710000	29961000		5.41811	1246770000000	57891700000	1369340000000
		5.43051	97968400000	3518260000	85720000		5.43051	332179000000	10827600000	1430460000	34854900		5.43051	2735320000	14282600000	664216000	314835000	2.32856e+06		5.43051	101572000000	344472000000	17999300000				5.43051	1258420000000	2329930000	176053000		5.43051	45015000000	13707000000	218713000	2.23638e+06		5.43051	647142000000	409666000000	367205000000	2479970000	31196300		5.43051	1260930000000	58943000000	1426520000000
		5.44291	98877000000	3527940000	86786100		5.44291	339509000000	10879500000	1438940000	35654400		5.44291	2874570000	14645600000	677441000	322425000	2.41618e+06		5.44291	102492000000	351864000000	18522500000				5.44291	1272670000000	2337300000	178060000		5.44291	45984700000	13798900000	219774000	2.28779e+06		5.44291	686428000000	421211000000	375782000000	2548690000	32476500		5.44291	1275190000000	60005600000	1486000000000
		5.4553	99793900000	3537800000	87863900		5.4553	346933000000	10930900000	1447360000	36465800		5.4553	3020470000	15015000000	690837000	330139000	2.50664e+06		5.4553	103420000000	359348000000	19059000000				5.4553	1286930000000	2344570000	180074000		5.4553	46965900000	13890400000	220824000	2.34003e+06		5.4553	727745000000	432975000000	384483000000	2618570000	33801100		5.4553	1289450000000	61079500000	1547860000000
		5.4677	100711000000	3547470000	88946000		5.4677	354448000000	10981400000	1455700000	37288200		5.4677	3173320000	15390300000	704346000	337975000	2.59994e+06		5.4677	104347000000	366922000000	19608600000				5.4677	1301150000000	2351610000	182083000		5.4677	47960000000	13982000000	221866000	2.39302e+06		5.4677	771136000000	444967000000	393309000000	2689950000	35173300		5.4677	1303680000000	62166300000	1612140000000
		5.4801	101627000000	3557140000	90032100		5.4801	362063000000	11031900000	1464050000	38123100		5.4801	3333210000	15771900000	718049000	345939000	2.69625e+06		5.4801	105274000000	374597000000	20171700000				5.4801	1315520000000	2358780000	184112000		5.4801	48965800000	14073300000	222905000	2.44684e+06		5.4801	816711000000	457188000000	402270000000	2762610000	36593900		5.4801	1318070000000	63264500000	1678970000000
		5.4925	102539000000	3566520000	91121800		5.4925	369772000000	11081900000	1472330000	38970300		5.4925	3500810000	16159700000	731870000	354025000	2.79557e+06		5.4925	106197000000	382366000000	20749200000				5.4925	1329950000000	2366010000	186153000		5.4925	49984500000	14164300000	223941000	2.50143e+06		5.4925	864503000000	469625000000	411349000000	2836530000	38062600		5.4925	1332510000000	64375300000	1748350000000
		5.5049	103453000000	3576020000	92219000		5.5049	377577000000	11131000000	1480570000	39829300		5.5049	3676000000	16553600000	745885000	362239000	2.89798e+06		5.5049	107121000000	390229000000	21340700000				5.5049	1344410000000	2372950000	188200000		5.5049	51015400000	14254900000	224965000	2.55675e+06		5.5049	914672000000	482288000000	420554000000	2911870000	39582500		5.5049	1346970000000	65497800000	1820470000000
		5.5173	104367000000	3585130000	93320600		5.5173	385478000000	11180400000	1488800000	40701300		5.5173	3859070000	16953900000	760021000	370578000	3.0035e+06		5.5173	108045000000	398188000000	21946500000				5.5173	1358940000000	2380040000	190260000		5.5173	52060300000	14345100000	225987000	2.61296e+06		5.5173	967326000000	495210000000	429890000000	2988540000	41154600		5.5173	1361510000000	66634000000	1895460000000
		5.5297	105282000000	3594440000	94429600		5.5297	393479000000	11228900000	1496990000	41585100		5.5297	4050610000	17360100000	774301000	379043000	3.11232e+06		5.5297	108971000000	406247000000	22567100000				5.5297	1373430000000	2386700000	192313000		5.5297	53112300000	14435200000	227000000	2.66988e+06		5.5297	1022510000000	508352000000	439364000000	3066630000	42781200		5.5297	1376000000000	67777200000	1973330000000
		5.54209	106205000000	3603720000	95548800		5.54209	401570000000	11277500000	1505170000	42481900		5.54209	4250860000	17773600000	788787000	387656000	3.22483e+06		5.54209	109905000000	414395000000	23204100000				5.54209	1387990000000	2393700000	194381000		5.54209	54183400000	14524800000	228006000	2.72767e+06		5.54209	1080280000000	521718000000	448963000000	3146090000	44462100		5.54209	1390580000000	68938900000	2054150000000
		5.55449	107118000000	3612610000	96662500		5.55449	409748000000	11325300000	1513280000	43389800		5.55449	4459930000	18192500000	803406000	396382000	3.34033e+06		5.55449	110827000000	422630000000	23855600000				5.55449	1402630000000	2400430000	196465000		5.55449	55263200000	14613800000	229005000	2.78619e+06		5.55449	1140820000000	535294000000	458685000000	3226910000	46199600		5.55449	1405220000000	70108800000	2138080000000
		5.56689	108037000000	3621730000	97792600		5.56689	418049000000	11372600000	1521380000	44311100		5.56689	4678130000	18618400000	818137000	405235000	3.4594e+06		5.56689	111757000000	430987000000	24523400000				5.56689	1417360000000	2407270000	198544000		5.56689	56353400000	14702900000	230000000	2.8456e+06		5.56689	1204200000000	549140000000	468514000000	3309200000	47996300		5.56689	1419960000000	71289200000	2225210000000
		5.57929	108950000000	3630400000	98918100		5.57929	426417000000	11419700000	1529430000	45244100		5.57929	4906000000	19050700000	833057000	414223000	3.58231e+06		5.57929	112679000000	439412000000	25207600000				5.57929	1432000000000	2413750000	200631000		5.57929	57460200000	14791800000	230989000	2.90577e+06		5.57929	1270520000000	563218000000	478510000000	3392830000	49851800		5.57929	1434610000000	72485900000	2315690000000
		5.59169	109866000000	3639320000	100054000		5.59169	434900000000	11466200000	1537470000	46190900		5.59169	5143640000	19487800000	848094000	423318000	3.70853e+06		5.59169	113605000000	447950000000	25906600000				5.59169	1446770000000	2420500000	202740000		5.59169	58577500000	14880000000	231972000	2.96678e+06		5.59169	1339860000000	577527000000	488612000000	3477910000	51767400		5.59169	1449390000000	73692500000	2409530000000
		5.60409	110783000000	3647910000	101195000		5.60409	443482000000	11512700000	1545450000	47149600		5.60409	5391810000	19933300000	863337000	432577000	3.83889e+06		5.60409	114532000000	456588000000	26624800000				5.60409	1461560000000	2427030000	204841000		5.60409	59703300000	14967500000	232940000	3.02849e+06		5.60409	1412380000000	592096000000	498844000000	3564420000	53748600		5.60409	1464190000000	74906800000	2506940000000
		5.61648	111700000000	3656590000	102343000		5.61648	452146000000	11558200000	1553370000	48119900		5.61648	5650320000	20384200000	878689000	441946000	3.9729e+06		5.61648	115459000000	465306000000	27359100000				5.61648	1476410000000	2433500000	206958000		5.61648	60846500000	15055400000	233913000	3.09116e+06		5.61648	1488180000000	606871000000	509201000000	3652400000	55794000		5.61648	1479050000000	76138900000	2607960000000
		5.62888	112614000000	3665000000	103493000		5.62888	460903000000	11603600000	1561280000	49104000		5.62888	5919870000	20841700000	894207000	451454000	4.11082e+06		5.62888	116383000000	474117000000	28111400000				5.62888	1491260000000	2439940000	209077000		5.62888	62000500000	15143500000	234884000	3.15475e+06		5.62888	1567330000000	621915000000	519702000000	3741790000	57906700		5.62888	1493910000000	77382100000	2712750000000
		5.64128	113530000000	3673530000	104650000		5.64128	469777000000	11648600000	1569170000	50101400		5.64128	6200760000	21307000000	909890000	461105000	4.25291e+06		5.64128	117309000000	483045000000	28883000000				5.64128	1506260000000	2446310000	211216000		5.64128	63165900000	15230200000	235835000	3.21895e+06		5.64128	1650010000000	637206000000	530320000000	3832600000	60086500		5.64128	1508920000000	78635200000	2821430000000
		5.65368	114449000000	3681880000	105814000		5.65368	478742000000	11693600000	1577080000	51112000		5.65368	6493270000	21777200000	925705000	470885000	4.39903e+06		5.65368	118236000000	492064000000	29671400000				5.65368	1521190000000	2452630000	213345000		5.65368	64342400000	15316900000	236781000	3.28408e+06		5.65368	1736300000000	652730000000	541070000000	3924990000	62336400		5.65368	1523860000000	79899300000	2934090000000
		5.66608	115361000000	3690040000	106978000		5.66608	487790000000	11737600000	1584860000	52133500		5.66608	6797940000	22255300000	941680000	480795000	4.54943e+06		5.66608	119158000000	501165000000	30480200000				5.66608	1536080000000	2458920000	215490000		5.66608	65535600000	15403500000	237735000	3.35006e+06		5.66608	1826370000000	668501000000	551955000000	4018730000	64656000		5.66608	1538750000000	81180200000	3050910000000
		5.67848	116278000000	3698330000	108153000		5.67848	496926000000	11781000000	1592590000	53167100		5.67848	7114910000	22739000000	957795000	490831000	4.70412e+06		5.67848	120084000000	510353000000	31307200000				5.67848	1551120000000	2465150000	217642000		5.67848	66736100000	15489500000	238673000	3.41682e+06		5.67848	1920190000000	684526000000	562969000000	4114120000	67051400		5.67848	1553800000000	82467700000	3171870000000
		5.69087	117192000000	3706380000	109329000		5.69087	506180000000	11824800000	1600370000	54217800		5.69087	7444920000	23229500000	974080000	501001000	4.86325e+06		5.69087	121008000000	519659000000	32154400000				5.69087	1566190000000	2471200000	219797000		5.69087	67949500000	15574700000	239601000	3.48438e+06		5.69087	2018190000000	700796000000	574088000000	4210810000	69522400		5.69087	1568880000000	83767300000	3297360000000
		5.70327	118105000000	3714370000	110509000		5.70327	515482000000	11867100000	1608000000	55275700		5.70327	7787910000	23726500000	990484000	511318000	5.02689e+06		5.70327	121929000000	529012000000	33021300000				5.70327	1581240000000	2477430000	221960000		5.70327	69176200000	15660100000	240519000	3.55282e+06		5.70327	2120250000000	717310000000	585364000000	4309150000	72068700		5.70327	1583940000000	85080400000	3427300000000
		5.71567	119015000000	3722300000	111698000		5.71567	524929000000	11910100000	1615710000	56350400		5.71567	8145150000	24230100000	1007060000	521757000	5.19514e+06		5.71567	122849000000	538511000000	33909300000				5.71567	1596370000000	2483500000	224132000		5.71567	70414400000	15744900000	241435000	3.62218e+06		5.71567	2226460000000	734078000000	596750000000	4408790000	74694600		5.71567	1599080000000	86404400000	3561770000000
		5.72807	119926000000	3730080000	112887000		5.72807	534457000000	11952000000	1623330000	57436800		5.72807	8515690000	24740500000	1023770000	532339000	5.36813e+06		5.72807	123769000000	548089000000	34817600000				5.72807	1611530000000	2489410000	226305000		5.72807	71662600000	15829100000	242351000	3.6922e+06		5.72807	2337170000000	751091000000	608278000000	4510050000	77402600		5.72807	1614240000000	87737700000	3701130000000
		5.74047	120841000000	3737910000	114085000		5.74047	544054000000	11993600000	1630890000	58535400		5.74047	8901290000	25257300000	1040620000	543059000	5.54598e+06		5.74047	124693000000	557737000000	35747800000				5.74047	1626650000000	2495260000	228494000		5.74047	72923400000	15912700000	243251000	3.76309e+06		5.74047	2452480000000	768380000000	619945000000	4612880000	80195400		5.74047	1629380000000	89083200000	3845500000000
		5.75287	121760000000	3745610000	115289000		5.75287	553762000000	12034700000	1638420000	59647900		5.75287	9301500000	25780600000	1057640000	553900000	5.72866e+06		5.75287	125620000000	567494000000	36699400000				5.75287	1641900000000	2501180000	230675000		5.75287	74197800000	15996500000	244155000	3.835e+06		5.75287	2572400000000	785900000000	631715000000	4717030000	83070600		5.75287	1644630000000	90442300000	3994820000000
		5.76526	122672000000	3753220000	116494000		5.76526	563574000000	12075800000	1645950000	60773900		5.76526	9717490000	26311100000	1074800000	564891000	5.91644e+06		5.76526	126542000000	577357000000	37674200000				5.76526	1657100000000	2507030000	232873000		5.76526	75486800000	16080800000	245050000	3.90764e+06		5.76526	2697140000000	803668000000	643618000000	4822860000	86032200		5.76526	1659840000000	91816500000	4149340000000
		5.77766	123572000000	3760610000	117703000		5.77766	573460000000	12116200000	1653420000	61912100		5.77766	10149400000	26847800000	1092080000	576016000	6.10934e+06		5.77766	127450000000	587292000000	38671400000				5.77766	1672390000000	2512830000	235082000		5.77766	76781500000	16164000000	245931000	3.98098e+06		5.77766	2826970000000	821720000000	655671000000	4930310000	89087000		5.77766	1675140000000	93195400000	4309380000000
		5.79006	124484000000	3768030000	118918000		5.79006	583452000000	12156300000	1660860000	63064300		5.79006	10597500000	27391400000	1109550000	587281000	6.30747e+06		5.79006	128371000000	597333000000	39692000000				5.79006	1687660000000	2518480000	237288000		5.79006	78091100000	16246100000	246808000	4.05538e+06		5.79006	2961800000000	840002000000	667837000000	5039150000	92230600		5.79006	1690420000000	94588100000	4474770000000
		5.80246	125401000000	3775510000	120141000		5.80246	593524000000	12196100000	1668240000	64227600		5.80246	11062200000	27942000000	1127140000	598682000	6.51114e+06		5.80246	129297000000	607452000000	40736500000				5.80246	1702990000000	2524090000	239495000		5.80246	79412600000	16328300000	247686000	4.13054e+06		5.80246	3101960000000	858556000000	680136000000	5149690000	95469400		5.80246	1705750000000	95992700000	4645900000000
		5.81486	126300000000	3782710000	121365000		5.81486	603695000000	12234700000	1675570000	65405900		5.81486	11544300000	28498500000	1144880000	610211000	6.72001e+06		5.81486	130204000000	617671000000	41804600000				5.81486	1718360000000	2529650000	241715000		5.81486	80746300000	16411200000	248554000	4.20672e+06		5.81486	3247640000000	877406000000	692576000000	5261840000	98804200		5.81486	1721130000000	97410200000	4822990000000
		5.82726	127213000000	3789780000	122592000		5.82726	613963000000	12274000000	1682980000	66597500		5.82726	12044400000	29062300000	1162750000	621883000	6.93443e+06		5.82726	131125000000	627987000000	42898200000				5.82726	1733710000000	2535220000	243941000		5.82726	82090000000	16492300000	249417000	4.28357e+06		5.82726	3398820000000	896442000000	705124000000	5375250000	102233000		5.82726	1736480000000	98836000000	5005860000000
		5.83966	128118000000	3797020000	123828000		5.83966	624313000000	12312400000	1690240000	67802100		5.83966	12562500000	29632500000	1180760000	633693000	7.1548e+06		5.83966	132039000000	638383000000	44016600000				5.83966	1749170000000	2540670000	246177000		5.83966	83445700000	16573500000	250266000	4.36137e+06		5.83966	3555790000000	915735000000	717803000000	5490420000	105765000		5.83966	1751960000000	100274000000	5194920000000
		5.85205	129017000000	3803930000	125064000		5.85205	634752000000	12350800000	1697410000	69018400		5.85205	13099600000	30208600000	1198930000	645640000	7.38074e+06		5.85205	132946000000	648869000000	45160100000				5.85205	1764540000000	2546140000	248409000		5.85205	84813700000	16654500000	251114000	4.43995e+06		5.85205	3718670000000	935298000000	730589000000	5606970000	109397000		5.85205	1767330000000	101724000000	5390280000000
		5.86445	129927000000	3810980000	126309000		5.86445	645296000000	12388600000	1704700000	70248600		5.86445	13655600000	30792100000	1217240000	657722000	7.61282e+06		5.86445	133864000000	659459000000	46330300000				5.86445	1780040000000	2551480000	250656000		5.86445	86193800000	16735200000	251961000	4.51952e+06		5.86445	3887770000000	955187000000	743525000000	5725390000	113139000		5.86445	1782850000000	103185000000	5592330000000
		5.87685	130823000000	3817700000	127553000		5.87685	655921000000	12425600000	1711880000	71492100		5.87685	14232000000	31384300000	1235660000	669949000	7.8509e+06		5.87685	134768000000	670130000000	47529800000				5.87685	1795520000000	2556760000	252903000		5.87685	87583700000	16814700000	252794000	4.59974e+06		5.87685	4063000000000	975231000000	756602000000	5845120000	116982000		5.87685	1798330000000	104656000000	5800790000000
		5.88925	131729000000	3824530000	128807000		5.88925	666638000000	12462400000	1719010000	72749600		5.88925	14828500000	31980300000	1254260000	682308000	8.09486e+06		5.88925	135682000000	680892000000	48753400000				5.88925	1811010000000	2562070000	255151000		5.88925	88987700000	16894600000	253630000	4.68106e+06		5.88925	4244750000000	995597000000	769784000000	5966500000	120933000		5.88925	1813830000000	106141000000	6016220000000
		5.90165	132632000000	3831240000	130063000		5.90165	677430000000	12499100000	1726070000	74018600		5.90165	15445900000	32584200000	1272980000	694810000	8.34574e+06		5.90165	136593000000	691730000000	50006200000				5.90165	1826510000000	2567240000	257410000		5.90165	90397300000	16974000000	254448000	4.76309e+06		5.90165	4433120000000	1016230000000	783127000000	6089570000	125004000		5.90165	1829340000000	107631000000	6238690000000
		5.91405	133530000000	3837850000	131319000		5.91405	688330000000	12534800000	1733150000	75303000		5.91405	16084600000	33195800000	1291860000	707445000	8.60252e+06		5.91405	137499000000	702673000000	51288200000				5.91405	1842050000000	2572420000	259680000		5.91405	91818900000	17052700000	255265000	4.84591e+06		5.91405	4628190000000	1037120000000	796543000000	6214170000	129183000		5.91405	1844880000000	109132000000	6468200000000
		5.92644	134428000000	3844400000	132585000		5.92644	699289000000	12571100000	1740150000	76598700		5.92644	16745300000	33811100000	1310840000	720214000	8.86609e+06		5.92644	138405000000	713677000000	52596300000				5.92644	1857640000000	2577550000	261947000		5.92644	93257000000	17130800000	256075000	4.92977e+06		5.92644	4830580000000	1058240000000	810130000000	6340380000	133482000		5.92644	1860480000000	110649000000	6705430000000
		5.93884	135323000000	3850920000	133850000		5.93884	710399000000	12606300000	1747130000	77908200		5.93884	17428800000	34436000000	1329970000	733127000	9.13601e+06		5.93884	139308000000	724830000000	53937000000				5.93884	1873190000000	2582550000	264225000		5.93884	94705800000	17209500000	256879000	5.01443e+06		5.93884	5039870000000	1079650000000	823819000000	6468160000	137902000		5.93884	1876030000000	112177000000	6949940000000
		5.95124	136218000000	3857260000	135124000		5.95124	721507000000	12641000000	1754040000	79230400		5.95124	18135600000	35067000000	1349280000	746199000	9.41317e+06		5.95124	140211000000	735981000000	55307500000				5.95124	1888790000000	2587550000	266502000		5.95124	96162200000	17287200000	257676000	5.09987e+06		5.95124	5256660000000	1101300000000	837636000000	6597500000	142442000		5.95124	1891640000000	113712000000	7202330000000
		5.96364	137112000000	3863570000	136398000		5.96364	732790000000	12675700000	1760930000	80567300		5.96364	18865600000	35702900000	1368670000	759390000	9.69701e+06		5.96364	141112000000	747307000000	56706200000				5.96364	1904430000000	2592500000	268790000		5.96364	97630100000	17364800000	258470000	5.18638e+06		5.96364	5480670000000	1123210000000	851581000000	6728430000	147102000		5.96364	1907290000000	115259000000	7462340000000
		5.97604	138006000000	3869820000	137679000		5.97604	744077000000	12709500000	1767780000	81916800		5.97604	19619800000	36345900000	1388180000	772691000	9.98747e+06		5.97604	142013000000	758636000000	58136600000				5.97604	1920050000000	2597390000	271076000		5.97604	99113900000	17441300000	259257000	5.27357e+06		5.97604	5713010000000	1145390000000	865640000000	6860910000	151894000		5.97604	1922910000000	116820000000	7731060000000
		5.98844	138899000000	3875940000	138962000		5.98844	755491000000	12743200000	1774620000	83279100		5.98844	20399300000	36996700000	1407840000	786172000	10285500		5.98844	142914000000	770092000000	59600300000				5.98844	1935710000000	2602220000	273371000		5.98844	100604000000	17518200000	260035000	5.36164e+06		5.98844	5952730000000	1167860000000	879821000000	6995310000	156813000		5.98844	1938590000000	118388000000	8007560000000
		6.00083	139791000000	3882080000	140251000		6.00083	767030000000	12777100000	1781430000	84655700		6.00083	21205400000	37654300000	1427680000	799791000	10591200		6.00083	143813000000	781673000000	61097700000				6.00083	1951360000000	2606990000	275668000		6.00083	102104000000	17594100000	260808000	5.45072e+06		6.00083	6200830000000	1190560000000	894126000000	7130990000	161868000		6.00083	1954250000000	119964000000	8292810000000
		6.01323	140679000000	3888060000	141541000		6.01323	778613000000	12809700000	1788150000	86044700		6.01323	22035900000	38319200000	1447620000	813536000	10904000		6.01323	144709000000	793297000000	62627200000				6.01323	1967070000000	2611750000	277971000		6.01323	103618000000	17670000000	261575000	5.54048e+06		6.01323	6457570000000	1213540000000	908575000000	7268560000	167056000		6.01323	1969960000000	121555000000	8587130000000
		6.02563	141563000000	3893990000	142836000		6.02563	790268000000	12842500000	1794830000	87446500		6.02563	22893900000	38988900000	1467680000	827418000	11224400		6.02563	145600000000	804993000000	64189100000				6.02563	1982800000000	2616440000	280279000		6.02563	105141000000	17745400000	262336000	5.6312e+06		6.02563	6722560000000	1236760000000	923118000000	7407550000	172377000		6.02563	1985700000000	123154000000	8890020000000
		6.03803	142447000000	3899840000	144135000		6.03803	802039000000	12874800000	1801510000	88863100		6.03803	23780000000	39666400000	1487960000	841453000	11552600		6.03803	146490000000	816804000000	65787300000				6.03803	1998520000000	2621030000	282591000		6.03803	106675000000	17820000000	263092000	5.72278e+06		6.03803	6996530000000	1260270000000	937828000000	7548190000	177845000		6.03803	2001420000000	124764000000	9202350000000
		6.05043	143332000000	3905650000	145437000		6.05043	813879000000	12906600000	1808140000	90291300		6.05043	24693200000	40349900000	1508220000	855591000	11888400		6.05043	147384000000	828684000000	67418800000				6.05043	2014260000000	2625650000	284909000		6.05043	108217000000	17894800000	263840000	5.81523e+06		6.05043	7279190000000	1284020000000	952619000000	7690340000	183453000		6.05043	2017170000000	126382000000	9523700000000
		6.06283	144214000000	3911370000	146746000		6.06283	825768000000	12938100000	1814700000	91733100		6.06283	25635500000	41040300000	1528630000	869888000	12232400		6.06283	148272000000	840613000000	69086500000				6.06283	2029990000000	2630160000	287231000		6.06283	109776000000	17969200000	264581000	5.90854e+06		6.06283	7571240000000	1308050000000	967552000000	7834510000	189208000		6.06283	2032900000000	128015000000	9854870000000
		6.07523	145098000000	3917020000	148052000		6.07523	837799000000	12969200000	1821280000	93189500		6.07523	26607100000	41737600000	1549290000	884332000	12584700		6.07523	149163000000	852683000000	70790900000				6.07523	2045740000000	2634650000	289554000		6.07523	111341000000	18042700000	265320000	6.00272e+06		6.07523	7872770000000	1332310000000	982587000000	7979840000	195111000		6.07523	2048660000000	129655000000	10195800000000
		6.08762	145973000000	3922530000	149364000		6.08762	849873000000	13000100000	1827750000	94656200		6.08762	27608300000	42441200000	1570010000	898920000	12945100		6.08762	150045000000	864796000000	72531400000				6.08762	2061540000000	2639110000	291885000		6.08762	112918000000	18116100000	266050000	6.09781e+06		6.08762	8183780000000	1356860000000	997739000000	8126930000	201166000		6.08762	2064480000000	131306000000	10546700000000
		6.10002	146852000000	3928170000	150686000		6.10002	862025000000	13030200000	1834230000	96138500		6.10002	28641300000	43151300000	1590820000	913623000	13314000		6.10002	150931000000	876986000000	74310300000				6.10002	2077340000000	2643520000	294222000		6.10002	114503000000	18189100000	266773000	6.1937e+06		6.10002	8504710000000	1381670000000	1013040000000	8275700000	207377000		6.10002	2080280000000	132966000000	10907900000000
		6.11242	147726000000	3933330000	152008000		6.11242	874272000000	13060300000	1840670000	97634200		6.11242	29704500000	43867500000	1611770000	928465000	13690900		6.11242	151811000000	889271000000	76125900000				6.11242	2093110000000	2647820000	296556000		6.11242	116099000000	18261900000	267493000	6.29049e+06		6.11242	8835780000000	1406730000000	1028440000000	8426200000	213745000		6.11242	2096050000000	134635000000	11279600000000
		6.12482	148601000000	3938940000	153328000		6.12482	886618000000	13090200000	1847110000	99142300		6.12482	30800100000	44590800000	1632820000	943460000	14077400		6.12482	152693000000	901654000000	77981300000				6.12482	2108920000000	2652120000	298898000		6.12482	117703000000	18333400000	268199000	6.388e+06		6.12482	9177190000000	1432070000000	1043960000000	8578000000	220275000		6.12482	2111870000000	136311000000	11662000000000
		6.13722	149473000000	3944090000	154657000		6.13722	899014000000	13118900000	1853380000	100663000		6.13722	31929100000	45321400000	1654090000	958591000	14472500		6.13722	153572000000	914087000000	79877600000				6.13722	2124730000000	2656340000	301240000		6.13722	119329000000	18406300000	268920000	6.48695e+06		6.13722	9529100000000	1457650000000	1059590000000	8731720000	226967000		6.13722	2127690000000	138010000000	12055300000000
		6.14962	150344000000	3949340000	155990000		6.14962	911514000000	13148300000	1859730000	102199000		6.14962	33090400000	46056700000	1675370000	973840000	14876200		6.14962	154449000000	926624000000	81811200000				6.14962	2140550000000	2660520000	303590000		6.14962	120955000000	18477400000	269616000	6.58617e+06		6.14962	9891890000000	1483460000000	1075350000000	8886970000	233826000		6.14962	2143510000000	139708000000	12459800000000
		6.16201	151213000000	3954620000	157325000		6.16201	924131000000	13177300000	1866110000	103751000		6.16201	34286800000	46799400000	1696830000	989236000	15289500		6.16201	155325000000	939278000000	83787500000				6.16201	2156400000000	2664660000	305945000		6.16201	122586000000	18547700000	270304000	6.6863e+06		6.16201	10265400000000	1509570000000	1091210000000	9043780000	240852000		6.16201	2159370000000	141410000000	12875500000000
		6.17441	152079000000	3959440000	158660000		6.17441	936716000000	13204700000	1872220000	105307000		6.17441	35517700000	47548800000	1718400000	1004770000	15712000		6.17441	156197000000	951898000000	85805400000				6.17441	2172240000000	2668750000	308303000		6.17441	124231000000	18618100000	270998000	6.78703e+06		6.17441	10650700000000	1536040000000	1107230000000	9202440000	248057000		6.17441	2175220000000	143127000000	13303400000000
		6.18681	152941000000	3964650000	159998000		6.18681	949472000000	13233200000	1878480000	106885000		6.18681	36784900000	48304500000	1740070000	1020450000	16143700		6.18681	157066000000	964690000000	87866000000				6.18681	2188070000000	2672790000	310661000		6.18681	125892000000	18688500000	271674000	6.88923e+06		6.18681	11046900000000	1562590000000	1123300000000	9362410000	255426000		6.18681	2191050000000	144859000000	13742400000000
		6.19921	153807000000	3969520000	161345000		6.19921	962221000000	13260100000	1884560000	108468000		6.19921	38088300000	49068200000	1761920000	1036270000	16585200		6.19921	157937000000	977474000000	89971300000				6.19921	2203930000000	2676810000	313025000		6.19921	127562000000	18759000000	272356000	6.9924e+06		6.19921	11455300000000	1589520000000	1139580000000	9524360000	262989000		6.19921	2206920000000	146601000000	14194200000000
		6.21161	154665000000	3974520000	162692000		6.21161	975100000000	13287200000	1890700000	110068000		6.21161	39428700000	49834800000	1783860000	1052220000	17036700		6.21161	158802000000	990388000000	92116600000				6.21161	2219820000000	2680750000	315395000		6.21161	129232000000	18827300000	273025000	7.09582e+06		6.21161	11876300000000	1616630000000	1155950000000	9687900000	270735000		6.21161	2222810000000	148339000000	14658900000000
		6.22401	155520000000	3979060000	164034000		6.22401	988084000000	13314400000	1896830000	111686000		6.22401	40807200000	50609800000	1805870000	1068300000	17497800		6.22401	159663000000	1003410000000	94308700000				6.22401	2235760000000	2684770000	317772000		6.22401	130924000000	18897100000	273696000	7.20065e+06		6.22401	12308200000000	1644060000000	1172330000000	9852820000	278664000		6.22401	2238770000000	150102000000	15134700000000
		6.2364	156376000000	3983670000	165389000		6.2364	1001110000000	13340600000	1902850000	113310000		6.2364	42224900000	51391600000	1828000000	1084530000	17969300		6.2364	160525000000	1016460000000	96547000000				6.2364	2251540000000	2688500000	320134000		6.2364	132620000000	18966100000	274355000	7.30605e+06		6.2364	12753100000000	1671730000000	1188890000000	10019500000	286771000		6.2364	2254550000000	151867000000	15624100000000
		6.2488	157239000000	3988790000	166755000		6.2488	1014220000000	13366700000	1908860000	114951000		6.2488	43679300000	52177000000	1850250000	1100840000	18450400		6.2488	161394000000	1029610000000	98825900000				6.2488	2267370000000	2692260000	322505000		6.2488	134324000000	19033500000	275002000	7.41226e+06		6.2488	13211200000000	1699600000000	1205550000000	10187600000	295082000		6.2488	2270380000000	153640000000	16126800000000
		6.2612	158086000000	3993170000	168109000		6.2612	1027410000000	13392800000	1914860000	116607000		6.2612	45176300000	52974100000	1872620000	1117360000	18942600		6.2612	162247000000	1042830000000	101159000000				6.2612	2283340000000	2695990000	324902000		6.2612	136038000000	19102000000	275654000	7.51942e+06		6.2612	13681600000000	1727760000000	1222360000000	10357500000	303576000		6.2612	2286360000000	155423000000	16642300000000
		6.2736	158947000000	3998010000	169480000		6.2736	1040650000000	13418100000	1920780000	118272000		6.2736	46714200000	53773500000	1895110000	1133950000	19445200		6.2736	163114000000	1056110000000	103536000000				6.2736	2299270000000	2699910000	327290000		6.2736	137762000000	19169100000	276293000	7.62742e+06		6.2736	14166100000000	1756250000000	1239230000000	10529000000	312279000		6.2736	2302290000000	157215000000	17172500000000
		6.286	159785000000	4002050000	170835000		6.286	1053960000000	13442900000	1926640000	119950000		6.286	48292300000	54581000000	1917740000	1150720000	19958400		6.286	163958000000	1069450000000	105962000000				6.286	2315030000000	2703300000	329661000		6.286	139496000000	19235600000	276937000	7.73632e+06		6.286	14663400000000	1784910000000	1256310000000	10702200000	321194000		6.286	2318060000000	159016000000	17715700000000
		6.2984	160634000000	4006670000	172206000		6.2984	1067390000000	13467800000	1932550000	121645000		6.2984	49912600000	55392200000	1940410000	1167610000	20482300		6.2984	164813000000	1082910000000	108433000000				6.2984	2330910000000	2706900000	332037000		6.2984	141234000000	19301200000	277556000	7.84583e+06		6.2984	15174700000000	1813830000000	1273380000000	10876800000	330293000		6.2984	2333950000000	160821000000	18273200000000
		6.3108	161480000000	4011040000	173579000		6.3108	1080820000000	13492400000	1938300000	123346000		6.3108	51577700000	56210400000	1963240000	1184620000	21017700		6.3108	165664000000	1096370000000	110957000000				6.3108	2346980000000	2710660000	334458000		6.3108	142989000000	19367300000	278193000	7.95639e+06		6.3108	15700300000000	1843050000000	1290590000000	11053200000	339611000		6.3108	2350020000000	162642000000	18845300000000
		6.32319	162320000000	4015310000	174951000		6.32319	1094370000000	13515700000	1944090000	125067000		6.32319	53288600000	57036200000	1986170000	1201810000	21564100		6.32319	166511000000	1109960000000	113534000000				6.32319	2362740000000	2714160000	336841000		6.32319	144746000000	19433700000	278805000	8.06776e+06		6.32319	16240300000000	1872510000000	1307950000000	11231100000	349141000		6.32319	2365790000000	164467000000	19432300000000
		6.33559	163157000000	4019280000	176322000		6.33559	1107980000000	13540100000	1949860000	126798000		6.33559	55042300000	57867900000	2009200000	1219070000	22121700		6.33559	167353000000	1123600000000	116161000000				6.33559	2378660000000	2717830000	339251000		6.33559	146519000000	19499400000	279420000	8.1802e+06		6.33559	16794900000000	1902210000000	1325420000000	11411000000	358894000		6.33559	2381710000000	166306000000	20034300000000
		6.34799	163995000000	4023550000	177702000		6.34799	1121640000000	13563500000	1955600000	128544000		6.34799	56842200000	58704700000	2032340000	1236500000	22691200		6.34799	168196000000	1137290000000	118838000000				6.34799	2394700000000	2721230000	341635000		6.34799	148293000000	19564600000	280027000	8.2933e+06		6.34799	17363900000000	1932140000000	1342930000000	11592100000	368854000		6.34799	2397760000000	168146000000	20650900000000
		6.36039	164837000000	4027690000	179090000		6.36039	1135390000000	13586700000	1961240000	130300000		6.36039	58687700000	59548500000	2055550000	1254050000	23272200		6.36039	169043000000	1151070000000	121569000000				6.36039	2410460000000	2724600000	344028000		6.36039	150085000000	19629200000	280635000	8.40725e+06		6.36039	17948700000000	1962330000000	1360600000000	11774700000	379048000		6.36039	2413530000000	170003000000	21283800000000
		6.37279	165665000000	4031570000	180470000		6.37279	1149220000000	13609400000	1966850000	132068000		6.37279	60582600000	60397300000	2078900000	1271730000	23864900		6.37279	169877000000	1164930000000	124354000000				6.37279	2426260000000	2727920000	346425000		6.37279	151882000000	19693400000	281233000	8.52208e+06		6.37279	18548700000000	1992780000000	1378360000000	11959000000	389464000		6.37279	2429340000000	171865000000	21932200000000
		6.38519	166495000000	4035630000	181855000		6.38519	1163140000000	13631600000	1972390000	133850000		6.38519	62523200000	61254500000	2102340000	1289540000	24469900		6.38519	170712000000	1178880000000	127194000000				6.38519	2442260000000	2731360000	348857000		6.38519	153677000000	19756900000	281822000	8.63768e+06		6.38519	19164300000000	2023480000000	1396240000000	12145200000	400109000		6.38519	2445340000000	173724000000	22596600000000
		6.39758	167330000000	4039660000	183253000		6.39758	1177100000000	13653200000	1977960000	135647000		6.39758	64514700000	62115000000	2125860000	1307490000	25087000		6.39758	171553000000	1192870000000	130088000000				6.39758	2458110000000	2734410000	351253000		6.39758	155491000000	19819200000	282403000	8.75405e+06		6.39758	19796400000000	2054460000000	1414250000000	12332900000	410995000		6.39758	2461200000000	175602000000	23277900000000
		6.40998	168156000000	4043530000	184644000		6.40998	1191070000000	13675500000	1983520000	137457000		6.40998	66554100000	62982600000	2149460000	1325540000	25716200		6.40998	172384000000	1206870000000	133037000000				6.40998	2474060000000	2737750000	353672000		6.40998	157311000000	19882600000	282985000	8.87147e+06		6.40998	20443800000000	2085620000000	1432280000000	12521800000	422108000		6.40998	2477150000000	177486000000	23974700000000
		6.42238	168976000000	4047230000	186036000		6.42238	1205130000000	13696500000	1988960000	139276000		6.42238	68647500000	63856500000	2173230000	1343760000	26358700		6.42238	173209000000	1220950000000	136047000000				6.42238	2489960000000	2741050000	356096000		6.42238	159137000000	19944600000	283557000	8.98956e+06		6.42238	21108600000000	2117100000000	1450470000000	12712800000	433472000		6.42238	2493060000000	179374000000	24689300000000
		6.43478	169800000000	4050770000	187428000		6.43478	1219320000000	13717700000	1994380000	141109000		6.43478	70791200000	64736400000	2197140000	1362100000	27013700		6.43478	174038000000	1235180000000	139114000000				6.43478	2505780000000	2743960000	358502000		6.43478	160981000000	20007100000	284128000	9.1086e+06		6.43478	21790100000000	2148780000000	1468780000000	12905000000	445079000		6.43478	2508880000000	181281000000	25421000000000
		6.44718	170616000000	4054460000	188829000		6.44718	1233560000000	13738700000	1999760000	142956000		6.44718	72988400000	65622800000	2221040000	1380580000	27681200		6.44718	174859000000	1249440000000	142240000000				6.44718	2521770000000	2747150000	360924000		6.44718	162824000000	20068700000	284692000	9.22846e+06		6.44718	22488400000000	2180680000000	1487150000000	13099200000	456926000		6.44718	2524880000000	183187000000	26169800000000
		6.45958	171428000000	4058080000	190232000		6.45958	1247760000000	13758800000	2005070000	144814000		6.45958	75236700000	66513800000	2245050000	1399160000	28361700		6.45958	175676000000	1263670000000	145423000000				6.45958	2537620000000	2750290000	363345000		6.45958	164680000000	20130400000	285253000	9.34921e+06		6.45958	23204400000000	2212850000000	1505600000000	13294500000	469026000		6.45958	2540740000000	185105000000	26936600000000
		6.47197	172240000000	4061550000	191630000		6.47197	1262160000000	13779600000	2010480000	146687000		6.47197	77540300000	67410100000	2269190000	1417860000	29056500		6.47197	176494000000	1278100000000	148666000000				6.47197	2553450000000	2753230000	365760000		6.47197	166543000000	20190900000	285805000	9.4708e+06		6.47197	23938200000000	2245260000000	1524210000000	13491500000	481397000		6.47197	2556570000000	187029000000	27721600000000
		6.48437	173060000000	4065220000	193042000		6.48437	1276520000000	13799000000	2015700000	148569000		6.48437	79900300000	68313800000	2293390000	1436730000	29763800		6.48437	177318000000	1292490000000	151974000000				6.48437	2569360000000	2756260000	368180000		6.48437	168408000000	20251500000	286349000	9.59304e+06		6.48437	24689800000000	2277900000000	1542880000000	13689900000	494020000		6.48437	2572480000000	188955000000	28524700000000
		6.49677	173867000000	4068540000	194448000		6.49677	1291000000000	13818700000	2020990000	150466000		6.49677	82315000000	69222600000	2317660000	1455700000	30486200		6.49677	178130000000	1306990000000	155341000000				6.49677	2585180000000	2759090000	370609000		6.49677	170285000000	20311900000	286897000	9.71628e+06		6.49677	25459600000000	2310800000000	1561660000000	13890600000	506908000		6.49677	2588310000000	190894000000	29346500000000
		6.50917	174674000000	4071940000	195857000		6.50917	1305520000000	13837600000	2026190000	152376000		6.50917	84785500000	70135400000	2342060000	1474780000	31220600		6.50917	178942000000	1321540000000	158769000000				6.50917	2601010000000	2762020000	373040000		6.50917	172172000000	20371000000	287429000	9.84024e+06		6.50917	26248300000000	2343940000000	1580550000000	14092100000	520048000		6.50917	2604150000000	192840000000	30187400000000
		6.52157	175479000000	4075250000	197271000		6.52157	1320120000000	13856800000	2031320000	154297000		6.52157	87315500000	71055700000	2366540000	1494000000	31969700		6.52157	179752000000	1336160000000	162264000000				6.52157	2616840000000	2764890000	375465000		6.52157	174063000000	20430500000	287964000	9.96507e+06		6.52157	27056300000000	2377220000000	1599500000000	14295500000	533468000		6.52157	2619980000000	194791000000	31047900000000
		6.53397	176285000000	4078430000	198685000		6.53397	1334780000000	13875400000	2036450000	156232000		6.53397	89905200000	71982900000	2391180000	1513380000	32733500		6.53397	180562000000	1350850000000	165825000000				6.53397	2632740000000	2767710000	377905000		6.53397	175967000000	20489800000	288489000	10090700		6.53397	27883700000000	2410990000000	1618580000000	14500400000	547167000		6.53397	2635880000000	196755000000	31928300000000
		6.54637	177083000000	4081570000	200099000		6.54637	1349500000000	13893800000	2041600000	158182000		6.54637	92554200000	72912100000	2415780000	1532820000	33510000		6.54637	181365000000	1365600000000	169448000000				6.54637	2648560000000	2770480000	380335000		6.54637	177871000000	20547900000	289010000	10217200		6.54637	28730600000000	2444640000000	1637740000000	14706800000	561145000		6.54637	2651710000000	198718000000	32828300000000
		6.55876	177878000000	4084810000	201523000		6.55876	1364240000000	13911800000	2046640000	160140000		6.55876	95262200000	73849600000	2440490000	1552420000	34301900		6.55876	182164000000	1380360000000	173139000000				6.55876	2664510000000	2773190000	382766000		6.55876	179789000000	20606400000	289526000	10344600		6.55876	29596400000000	2478800000000	1657010000000	14914800000	575426000		6.55876	2667660000000	200695000000	33747700000000
		6.57116	178678000000	4087940000	202947000		6.57116	1379090000000	13929300000	2051640000	162112000		6.57116	98031600000	74792400000	2465310000	1572150000	35109100		6.57116	182969000000	1395230000000	176897000000				6.57116	2680310000000	2775970000	385209000		6.57116	181707000000	20663800000	290037000	10472700		6.57116	30482600000000	2513030000000	1676350000000	15124400000	589959000		6.57116	2683470000000	202671000000	34687700000000
		6.58356	179462000000	4090900000	204365000		6.58356	1393950000000	13946900000	2056640000	164094000		6.58356	100863000000	75739500000	2490220000	1592010000	35931100		6.58356	183758000000	1410120000000	180721000000				6.58356	2696060000000	2778590000	387634000		6.58356	183639000000	20721100000	290543000	10601500		6.58356	31390700000000	2547690000000	1695910000000	15335700000	604817000		6.58356	2699220000000	204661000000	35650200000000
		6.59596	180259000000	4093870000	205791000		6.59596	1408890000000	13963800000	2061580000	166088000		6.59596	103755000000	76696200000	2515230000	1611960000	36768100		6.59596	184558000000	1425080000000	184616000000				6.59596	2711830000000	2781150000	390069000		6.59596	185573000000	20778100000	291039000	10731100		6.59596	32317300000000	2582330000000	1715330000000	15548100000	619946000		6.59596	2715000000000	206652000000	36631100000000
		6.60836	181040000000	4096730000	207218000		6.60836	1423860000000	13980500000	2066490000	168095000		6.60836	106714000000	77652900000	2540280000	1632030000	37619500		6.60836	185344000000	1440080000000	188577000000				6.60836	2727590000000	2783660000	392519000		6.60836	187520000000	20834600000	291538000	10861800		6.60836	33267200000000	2617430000000	1734940000000	15762300000	635389000		6.60836	2730760000000	208657000000	37635900000000
		6.62076	181827000000	4099590000	208645000		6.62076	1438900000000	13997100000	2071360000	170117000		6.62076	109746000000	78616700000	2565440000	1652280000	38487500		6.62076	186135000000	1455130000000	192619000000				6.62076	2743510000000	2786330000	394963000		6.62076	189466000000	20890600000	292021000	10993000		6.62076	34237300000000	2652700000000	1754660000000	15978000000	651111000		6.62076	2746690000000	210660000000	38661200000000
		6.63315	182607000000	4102350000	210064000		6.63315	1454020000000	14013300000	2076230000	172150000		6.63315	112835000000	79586600000	2590710000	1672610000	39370800		6.63315	186919000000	1470280000000	196724000000				6.63315	2759140000000	2788750000	397391000		6.63315	191425000000	20946400000	292510000	11124800		6.63315	35227300000000	2687940000000	1774480000000	16194500000	667144000		6.63315	2762330000000	212675000000	39706600000000
		6.64555	183385000000	4105130000	211500000		6.64555	1469150000000	14029400000	2080990000	174191000		6.64555	115993000000	80559900000	2615960000	1693010000	40269300		6.64555	187702000000	1485440000000	200902000000				6.64555	2774960000000	2791200000	399843000		6.64555	193391000000	21002200000	292991000	11258300		6.64555	36241900000000	2723630000000	1794300000000	16413200000	683500000		6.64555	2778150000000	214697000000	40776900000000
		6.65795	184166000000	4107930000	212938000		6.65795	1484360000000	14045100000	2085750000	176247000		6.65795	119220000000	81543100000	2641370000	1713630000	41184500		6.65795	188487000000	1500670000000	205159000000				6.65795	2790730000000	2793620000	402284000		6.65795	195362000000	21057000000	293461000	11391900		6.65795	37278300000000	2759610000000	1814350000000	16633400000	700162000		6.65795	2793930000000	216724000000	41869600000000
		6.67035	184940000000	4110490000	214375000		6.67035	1499610000000	14060200000	2090510000	178315000		6.67035	122513000000	82528600000	2666830000	1734290000	42116200		6.67035	189264000000	1515940000000	209485000000				6.67035	2806420000000	2795980000	404727000		6.67035	197338000000	21111500000	293931000	11526500		6.67035	38336400000000	2795650000000	1834460000000	16855200000	717152000		6.67035	2809620000000	218755000000	42984000000000
		6.68275	185710000000	4112990000	215812000		6.68275	1514980000000	14075800000	2095240000	180406000		6.68275	125876000000	83517000000	2692380000	1755120000	43063600		6.68275	190039000000	1531330000000	213884000000				6.68275	2822170000000	2798290000	407176000		6.68275	199321000000	21165600000	294398000	11661600		6.68275	39418300000000	2832020000000	1854580000000	17078200000	734464000		6.68275	2825380000000	220793000000	44122700000000
		6.69515	186470000000	4115520000	217241000		6.69515	1530300000000	14090300000	2099830000	182490000		6.69515	129314000000	84513000000	2717960000	1776030000	44027700		6.69515	190803000000	1546670000000	218365000000				6.69515	2837860000000	2800640000	409622000		6.69515	201317000000	21219800000	294860000	11797800		6.69515	40524900000000	2868660000000	1874820000000	17303200000	752121000		6.69515	2841070000000	222843000000	45286400000000
		6.70754	187239000000	4118010000	218684000		6.70754	1545700000000	14104700000	2104480000	184593000		6.70754	132820000000	85513900000	2743640000	1797040000	45008200		6.70754	191576000000	1562090000000	222920000000				6.70754	2853550000000	2802940000	412075000		6.70754	203301000000	21271900000	295307000	11934000		6.70754	41653600000000	2905340000000	1895170000000	17529200000	770094000		6.70754	2856770000000	224880000000	46472400000000
		6.71994	188005000000	4120540000	220129000		6.71994	1561210000000	14119400000	2109100000	186714000		6.71994	136399000000	86517900000	2769380000	1818180000	46006000		6.71994	192346000000	1577620000000	227551000000				6.71994	2869270000000	2805100000	414516000		6.71994	205306000000	21325100000	295751000	12071900		6.71994	42805600000000	2942260000000	1915520000000	17756400000	788385000		6.71994	2872490000000	226939000000	47681900000000
		6.73234	188765000000	4122880000	221569000		6.73234	1576690000000	14133000000	2113600000	188837000		6.73234	140051000000	87529900000	2795200000	1839460000	47021200		6.73234	193110000000	1593120000000	232262000000				6.73234	2884910000000	2807290000	416966000		6.73234	207328000000	21379300000	296214000	12211200		6.73234	43982300000000	2979480000000	1936010000000	17985300000	807040000		6.73234	2888140000000	229016000000	48916600000000
[truncated: 257 more rows]

## Sheet: Figure 9 RRKM Anions
		CCSD(T)/TZ//B3LYP-D3																									CCSD(T)/TZ//wB97XD
[truncated: 802 more rows]
