# Supplementary material for: Magic cluster sizes of cationic and anionic sodium chloride clusters explained by statistical modeling of the complete phase space
Source: Royal Society of Chemistry journal article supplement (doi:10.1039/d4cp00357h), 2024-01-01
Supplement: d4cp00357h1.pdf [file d4cp00357h1.pdf]

**Magic Cluster Sizes of Cationic and Anionic Sodium Chloride Clusters Explained by Statistical  
Modeling of the Complete Phase Space**

*Jessica C. Hartmann, Sarah J. Madlener, Christian van der Linde, Milan Ončák,\* Martin K.  
Beyer\**

*Universität Innsbruck, Institut für Ionenphysik und Angewandte Physik, Technikerstraße 25,  
6020 Innsbruck, Austria*

*Email: milan.oncak@uibk.ac.at; martin.beyer@uibk.ac.at*

Supplementary Material

# 1. Optimized Structures

## 1.1 Cationic Clusters

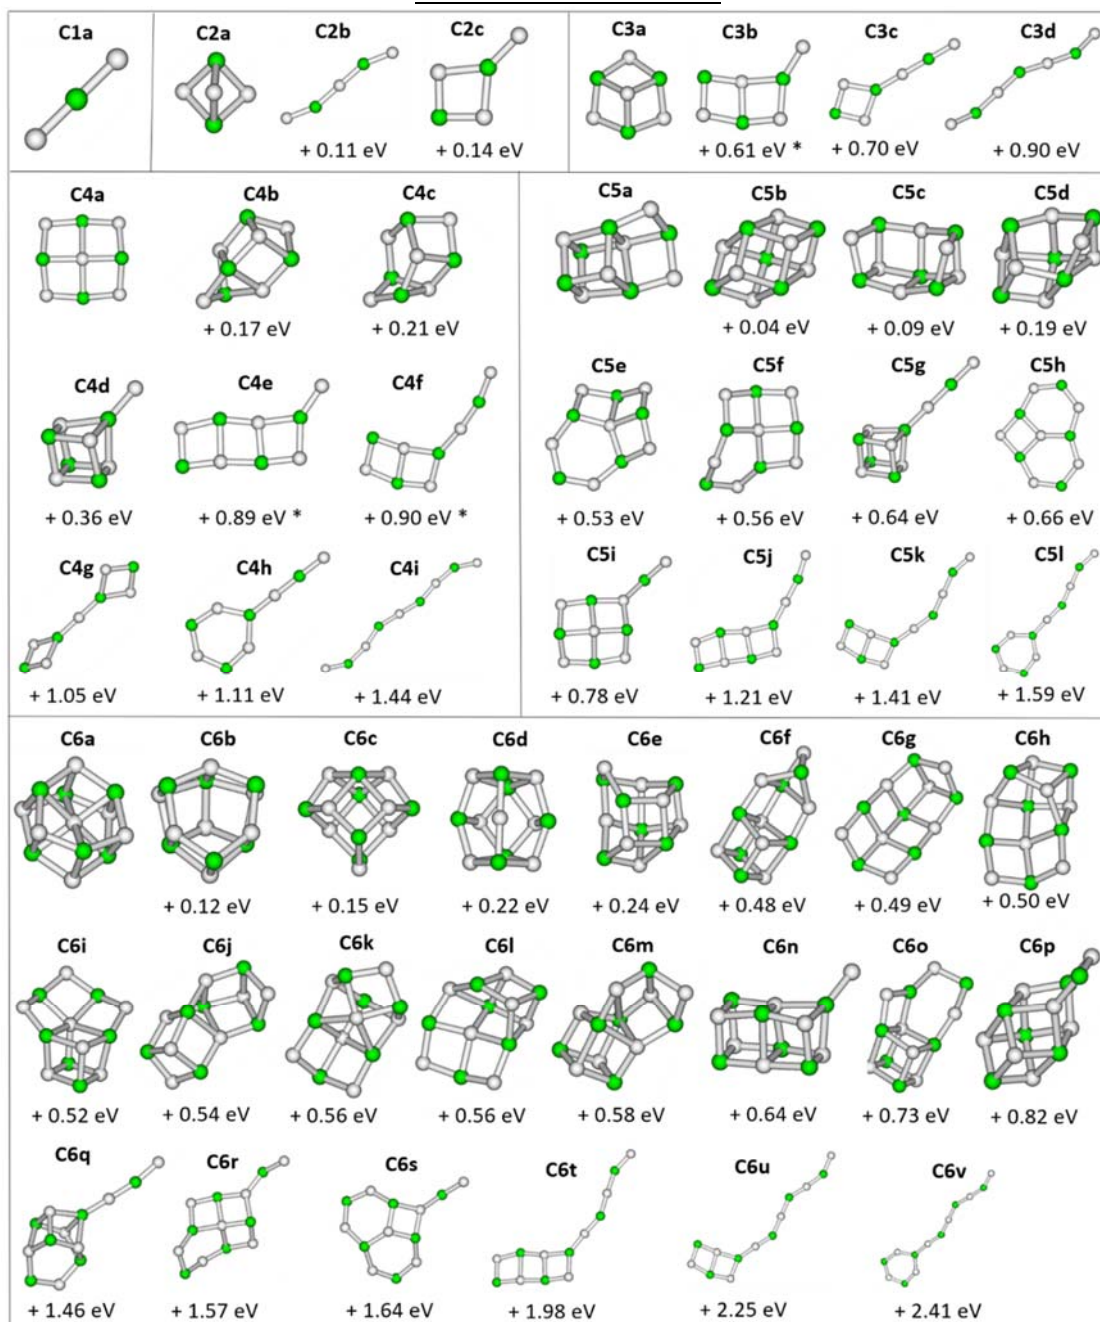

**Figure S1:** Overview of the lowest-energy isomers with relative energies calculated at the CCSD/DZ//B3LYP-D3 level of theory for the cationic clusters  $(\text{NaCl})_x\text{Na}^+$ ,  $x = 1-6$ . Energies marked with \* are obtained by using the  $\omega\text{B97XD}$  functional for the geometrical optimization due to the presence of an imaginary frequency using the B3LYP-D3 functional.

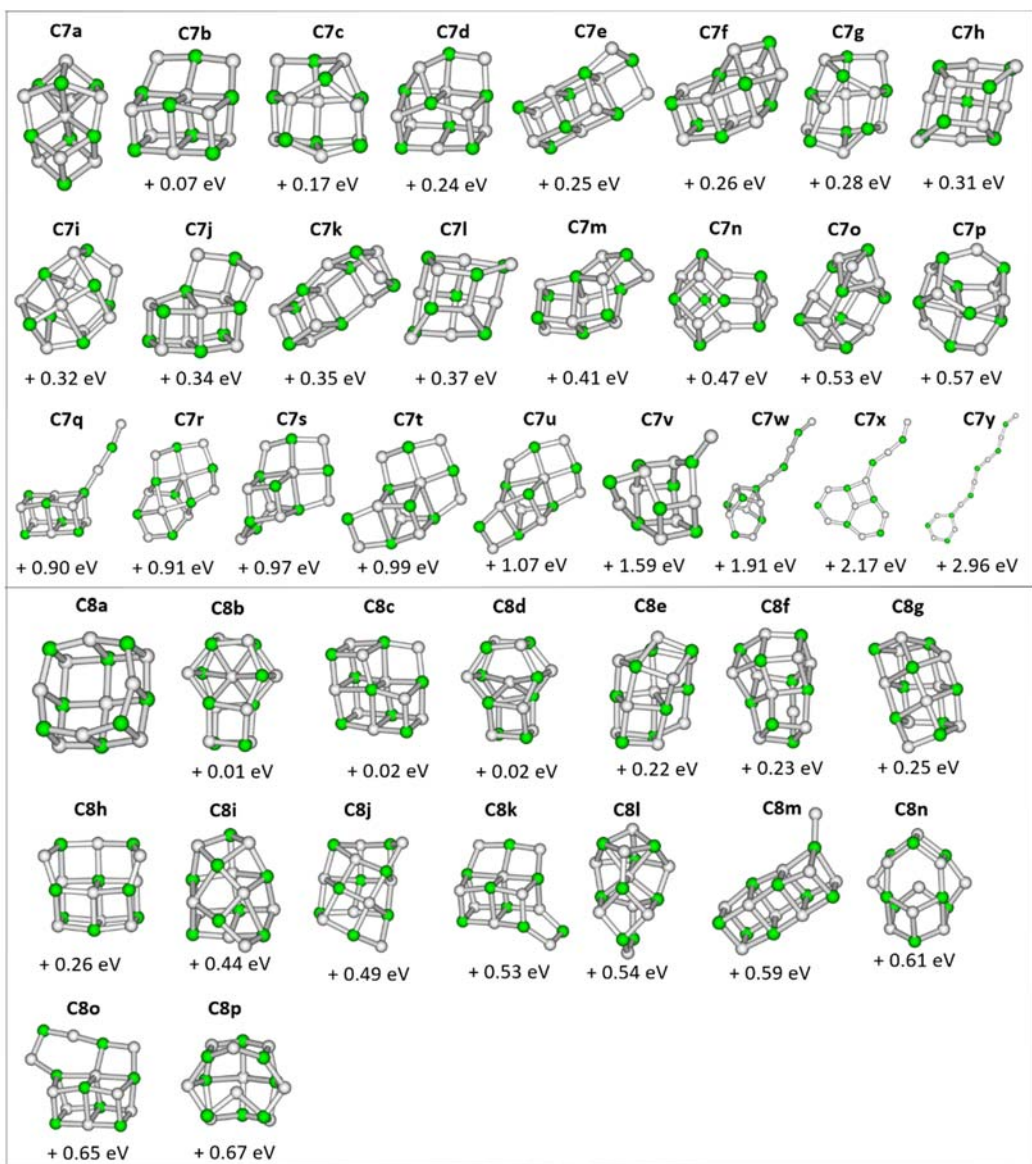

**Figure S2:** Overview of the lowest-energy isomers with relative energies calculated at the CCSD/DZ//B3LYP-D3 level of theory for the cationic clusters  $(\text{NaCl})_x\text{Na}^+$  with  $x = 7, 8$ .

**Table S1:** Overview of the lowest-energy isomers including symmetry groups and relative energies of  $(\text{NaCl})_x\text{Na}^+$ . Isomers whose energy is marked with \* have one imaginary frequency within the listed symmetry group and thus, the listed energy corresponds to a structure with lower symmetry. Imaginary frequency for given functional: i. f.

| Isomer | Symmetry Group                   | B3LYP-D3/<br>aug-cc-pVDZ | CCSD/DZ//<br>B3LYP-D3 | CCSD/TZ//<br>B3LYP-D3 | CCSD(T)/TZ/<br>/B3LYP-D3 | $\omega$ B97XD/<br>aug-cc-pVDZ | CCSD/DZ//<br>$\omega$ B97XD | CCSD/TZ//<br>$\omega$ B97XD | CCSD(T)/TZ/<br>/ $\omega$ B97XD |
|--------|----------------------------------|--------------------------|-----------------------|-----------------------|--------------------------|--------------------------------|-----------------------------|-----------------------------|---------------------------------|
| C1a    | $D_{\infty h}$                   | 0.00                     | 0.00                  | 0.00                  | 0.00                     | 0.00                           |                             | 0.00                        | 0.00                            |
| C2a    | $D_{3h}$                         | 0.00                     | 0.00                  | 0.00                  | 0.00                     | 0.00                           |                             | 0.00                        | 0.00                            |
| C2b    | $C_2$ ( $^{\circ}D_{\infty h}$ ) | 0.19                     | 0.11                  | 0.04                  | 0.06                     | 0.20 $^{\circ}$                |                             | 0.01 $^{\circ}$             | 0.03 $^{\circ}$                 |
| C2c    | $C_{2v}$                         | 0.16                     | 0.14                  | 0.10                  | 0.11                     | 0.19                           |                             | 0.09                        | 0.10                            |
| C3a    | $C_{3v}$                         | 0.00                     | 0.00                  | 0.00                  | 0.00                     | 0.00                           | 0.00                        | 0.00                        | 0.00                            |
| C3b    | $C_1$                            | i. f.                    |                       |                       |                          | 0.65                           | 0.61                        | 0.59                        | 0.60                            |
| C3c    | $C_{2v}$                         | 0.84                     | 0.70                  | 0.64                  | 0.66                     | 0.77                           | 0.70                        | 0.66                        | 0.67                            |
| C3d    | $C_2$                            | 1.07                     | 0.90                  | 0.83                  | 0.85                     | 0.99                           | 0.87                        | 0.79                        | 0.81                            |
| C4a    | $C_{2v}$                         | 0.02                     | 0.00                  | 0.00                  | 0.00                     | 0.00                           | 0.00                        | 0.00                        | 0.00                            |
| C4b    | $C_s$                            | 0.00                     | 0.17                  | 0.24                  | 0.22                     | 0.06                           | 0.17                        | 0.24                        | 0.23                            |
| C4c    | $C_2$                            | 0.02                     | 0.21                  | 0.26                  | 0.25                     | 0.15                           | 0.20                        | 0.25                        | 0.24                            |
| C4d    | $C_{3v}$                         | 0.23                     | 0.36                  | 0.44                  | 0.42                     | 0.27                           | 0.37                        | 0.45                        | 0.44                            |
| C4e    | $C_s$                            | i. f.                    |                       |                       |                          | 0.89                           | 0.89                        | 0.90                        | 0.91                            |
| C4f    | $C_s$                            | i. f.                    |                       |                       |                          | 0.93                           | 0.90                        | 0.89                        | 0.91                            |
| C4g    | $D_{2d}$                         | 1.11                     | 1.05                  | 1.06                  | 1.07                     | i. f.                          |                             |                             |                                 |
| C4h    | $C_{2v}$                         | 1.11                     | 1.11                  | 1.10                  | 1.12                     | i. f.                          |                             |                             |                                 |
| C4i    | $C_s$                            | 1.58                     | 1.44                  | 1.41                  | 1.44                     | 1.50                           |                             | 1.35                        | 1.38                            |
| C5a    | $C_s$                            | 0.00                     | 0.00                  | 0.00                  | 0.00                     | 0.01                           | 0.00                        | 0.00                        | 0.00                            |
| C5b    | $D_{3h}$                         | 0.05                     | 0.04                  | 0.04                  | 0.03                     | 0.00                           | 0.09                        | 0.08                        | 0.08                            |
| C5c    | $C_{2v}$                         | 0.13                     | 0.09                  | 0.08                  | 0.08                     | 0.15                           | 0.09                        | 0.07                        | 0.08                            |
| C5d    | $C_1$                            | 0.14                     | 0.19                  | 0.19                  | 0.19                     | i. f.                          |                             |                             |                                 |
| C5e    | $C_2$                            | 0.68                     | 0.53                  | 0.46                  | 0.49                     | 0.67                           |                             | 0.44                        | 0.46                            |
| C5f    | $C_1$                            | 0.72                     | 0.56                  | 0.50                  | 0.52                     | 0.67                           |                             | 0.50                        | 0.52                            |
| C5g    | $C_{3v}$                         | 0.83                     | 0.64                  | 0.61                  | 0.62                     | 0.71                           |                             | 0.62                        | 0.64                            |
| C5h    | $C_{2v}$                         | 0.80                     | 0.66                  | 0.57                  | 0.61                     | i. f.                          |                             |                             |                                 |
| C5i    | $C_1$                            | 1.05                     | 0.78                  | 0.70                  | 0.72                     | 0.91                           |                             | 0.66                        | 0.68                            |
| C5j    | $C_1$                            | 1.54                     | 1.21                  | 1.11                  | 1.15                     | 1.37                           |                             | 1.12                        | 1.15                            |
| C5k    | $C_s$                            | 1.77                     | 1.41                  | 1.31                  | 1.35                     | 1.58*                          |                             | 1.29*                       | 1.33*                           |
| C5l    | $C_s$                            | 1.87                     | 1.59                  | 1.48                  | 1.54                     | i. f.                          |                             |                             |                                 |
| C6a    | $D_{3d}$                         | 0.00                     | 0.00                  | 0.00                  | 0.00                     | 0.00                           |                             | 0.00                        | 0.00                            |
| C6b    | $C_{3v}$                         | 0.10                     | 0.12                  | 0.12                  | 0.15                     | 0.29                           |                             | 0.09                        | 0.12                            |
| C6c    | $C_{2v}$                         | 0.13                     | 0.15                  | 0.14                  | 0.17                     | 0.36                           |                             | 0.10                        | 0.13                            |
| C6d    | $C_{2v}$                         | 0.14                     | 0.22                  | 0.21                  | 0.23                     | 0.32                           |                             | 0.21                        | 0.23                            |
| C6e    | $C_1$                            | 0.17                     | 0.24                  | 0.23                  | 0.25                     | 0.38                           |                             | 0.21                        | 0.23                            |
| C6f    | $C_s$                            | 0.48                     | 0.48                  | 0.48                  | 0.50                     | 0.60                           |                             | 0.47                        | 0.49                            |
| C6g    | $C_s$                            | 0.69                     | 0.49                  | 0.43                  | 0.47                     | 0.75                           |                             | 0.40                        | 0.44                            |
| C6h    | $C_1$                            | 0.59                     | 0.50                  | 0.47                  | 0.50                     | 0.68                           |                             | 0.43                        | 0.46                            |
| C6i    | $C_s$                            | 0.58                     | 0.52                  | 0.47                  | 0.50                     | 0.72                           |                             | 0.42                        | 0.45                            |
| C6j    | $C_1$                            | 0.56                     | 0.54                  | 0.52                  | 0.55                     | 0.69                           |                             | 0.49                        | 0.52                            |
| C6k    | $C_s$                            | 0.59                     | 0.56                  | 0.52                  | 0.54                     | 0.68                           |                             | 0.47                        | 0.49                            |
| C6l    | $C_1$                            | 0.65                     | 0.56                  | 0.51                  | 0.54                     | 0.70                           |                             | 0.49                        | 0.51                            |
| C6m    | $C_1$                            | 0.53                     | 0.58                  | 0.56                  | 0.59                     | i. f.                          |                             |                             |                                 |
| C6n    | $C_s$                            | 0.67                     | 0.64                  | 0.64                  | 0.66                     | 0.79                           |                             | 0.63                        | 0.65                            |
| C6o    | $C_1$                            | 0.77                     | 0.73                  | 0.70                  | 0.73                     | 0.90                           |                             | 0.67                        | 0.71                            |
| C6p    | $C_s$                            | 0.84                     | 0.82                  | 0.79                  | 0.82                     | 0.91                           |                             | 0.77                        | 0.79                            |
| C6q    | $C_s$                            | 1.60                     | 1.46                  | 1.39                  | 1.44                     | i. f.                          |                             |                             |                                 |

| Isomer | Symmetry Group  | B3LYP-D3/<br>aug-cc-pVDZ | CCSD/DZ//<br>B3LYP-D3 | CCSD/TZ//<br>B3LYP-D3 | CCSD(T)/TZ/<br>B3LYP-D3 | $\omega$ B97XD/<br>aug-cc-pVDZ | CCSD/DZ//<br>$\omega$ B97XD | CCSD/TZ//<br>$\omega$ B97XD | CCSD(T)/TZ/<br>$\omega$ B97XD |
|--------|-----------------|--------------------------|-----------------------|-----------------------|-------------------------|--------------------------------|-----------------------------|-----------------------------|-------------------------------|
| C6r    | C <sub>1</sub>  | 1.87                     | 1.57                  | 1.48                  | 1.54                    | 1.87                           |                             | 1.43                        | 1.49                          |
| C6s    | C <sub>s</sub>  | 1.89                     | 1.64                  | 1.54                  | 1.61                    | 2.00                           |                             | 1.44                        | 1.51                          |
| C6t    | C <sub>s</sub>  | 2.44                     | 1.98                  | 1.85                  | 1.92                    | 2.32*                          |                             | 1.79*                       | 1.87*                         |
| C6u    | C <sub>1</sub>  | 2.72                     | 2.25                  | 2.11                  | 2.19                    | 2.60                           |                             | 2.04                        | 2.12                          |
| C6v    | C <sub>s</sub>  | 2.81                     | 2.41                  | 2.27                  | 2.37                    | i. f.                          |                             |                             |                               |
| C7a    | C <sub>3v</sub> | 0.00                     | 0.00                  |                       |                         | 0.00                           |                             |                             |                               |
| C7b    | C <sub>2v</sub> | 0.10                     | 0.07                  |                       |                         | 0.20                           |                             |                             |                               |
| C7c    | C <sub>1</sub>  | 0.08                     | 0.17                  |                       |                         | 0.24                           |                             |                             |                               |
| C7d    | C <sub>1</sub>  | 0.14                     | 0.24                  |                       |                         | 0.24                           |                             |                             |                               |
| C7e    | C <sub>s</sub>  | 0.26                     | 0.25                  |                       |                         | 0.35                           |                             |                             |                               |
| C7f    | C <sub>s</sub>  | 0.22                     | 0.26                  |                       |                         | 0.28                           |                             |                             |                               |
| C7g    | C <sub>1</sub>  | 0.16                     | 0.28                  |                       |                         | i. f.                          |                             |                             |                               |
| C7h    | C <sub>2v</sub> | 0.26                     | 0.31                  |                       |                         | i. f.                          |                             |                             |                               |
| C7i    | C <sub>1</sub>  | 0.12                     | 0.32                  |                       |                         | 0.25                           |                             |                             |                               |
| C7j    | C <sub>1</sub>  | 0.27                     | 0.34                  |                       |                         | 0.42                           |                             |                             |                               |
| C7k    | C <sub>s</sub>  | 0.40                     | 0.35                  |                       |                         | 0.47                           |                             |                             |                               |
| C7l    | C <sub>s</sub>  | 0.19                     | 0.37                  |                       |                         | 0.42                           |                             |                             |                               |
| C7m    | C <sub>1</sub>  | 0.31                     | 0.41                  |                       |                         | 0.28                           |                             |                             |                               |
| C7n    | C <sub>s</sub>  | 0.40                     | 0.47                  |                       |                         | 0.53                           |                             |                             |                               |
| C7o    | C <sub>s</sub>  | 0.53                     | 0.53                  |                       |                         | i. f.                          |                             |                             |                               |
| C7p    | C <sub>2</sub>  | 0.45                     | 0.57                  |                       |                         | 0.56                           |                             |                             |                               |
| C7q    | C <sub>s</sub>  | 1.08                     | 0.90                  |                       |                         | 1.05                           |                             |                             |                               |
| C7r    | C <sub>s</sub>  | 0.95                     | 0.91                  |                       |                         | 1.05                           |                             |                             |                               |
| C7s    | C <sub>s</sub>  | 1.00                     | 0.97                  |                       |                         | 1.12                           |                             |                             |                               |
| C7t    | C <sub>1</sub>  | 1.02                     | 0.99                  |                       |                         | i. f.                          |                             |                             |                               |
| C7u    | C <sub>1</sub>  | 1.14                     | 1.07                  |                       |                         | 1.13                           |                             |                             |                               |
| C7v    | C <sub>s</sub>  | 1.54                     | 1.59                  |                       |                         | i. f.                          |                             |                             |                               |
| C7w    | C <sub>s</sub>  | 2.17                     | 1.91                  |                       |                         | 2.17                           |                             |                             |                               |
| C7x    | C <sub>s</sub>  | 2.54                     | 2.17                  |                       |                         | 2.54*                          |                             |                             |                               |
| C7y    | C <sub>s</sub>  | 3.46                     | 2.96                  |                       |                         | i. f.                          |                             |                             |                               |
| C8a    | C <sub>4v</sub> | 0.10                     | 0.00                  |                       |                         | 0.23                           | 0.00                        |                             |                               |
| C8b    | C <sub>2</sub>  | 0.04                     | 0.01                  |                       |                         | 0.00                           | 0.02                        |                             |                               |
| C8c    | C <sub>s</sub>  | 0.00                     | 0.02                  |                       |                         | 0.14                           | 0.02                        |                             |                               |
| C8d    | C <sub>2</sub>  | 0.02                     | 0.02                  |                       |                         | i. f.                          |                             |                             |                               |
| C8e    | C <sub>1</sub>  | 0.29                     | 0.22                  |                       |                         | 0.31                           |                             |                             |                               |
| C8f    | C <sub>s</sub>  | 0.21                     | 0.23                  |                       |                         | 0.33                           |                             |                             |                               |
| C8g    | C <sub>1</sub>  | 0.27                     | 0.25                  |                       |                         | 0.38                           |                             |                             |                               |
| C8h    | C <sub>s</sub>  | 0.24                     | 0.26                  |                       |                         | 0.38                           |                             |                             |                               |
| C8i    | C <sub>1</sub>  | 0.37                     | 0.44                  |                       |                         | 0.42                           |                             |                             |                               |
| C8j    | C <sub>2</sub>  | 0.42                     | 0.49                  |                       |                         | 0.48                           |                             |                             |                               |
| C8k    | C <sub>1</sub>  | 0.70                     | 0.53                  |                       |                         | 0.75                           |                             |                             |                               |
| C8l    | C <sub>s</sub>  | 0.56                     | 0.54                  |                       |                         | i. f.                          |                             |                             |                               |
| C8m    | C <sub>s</sub>  | 0.77                     | 0.59                  |                       |                         | 0.75                           |                             |                             |                               |
| C8n    | C <sub>s</sub>  | 0.40                     | 0.61                  |                       |                         | i. f.                          |                             |                             |                               |
| C8o    | C <sub>s</sub>  | 0.79                     | 0.65                  |                       |                         | 0.86                           |                             |                             |                               |
| C8p    | C <sub>s</sub>  | 0.49                     | 0.67                  |                       |                         | i. f.                          |                             |                             |                               |

## 1.2 Anionic Clusters

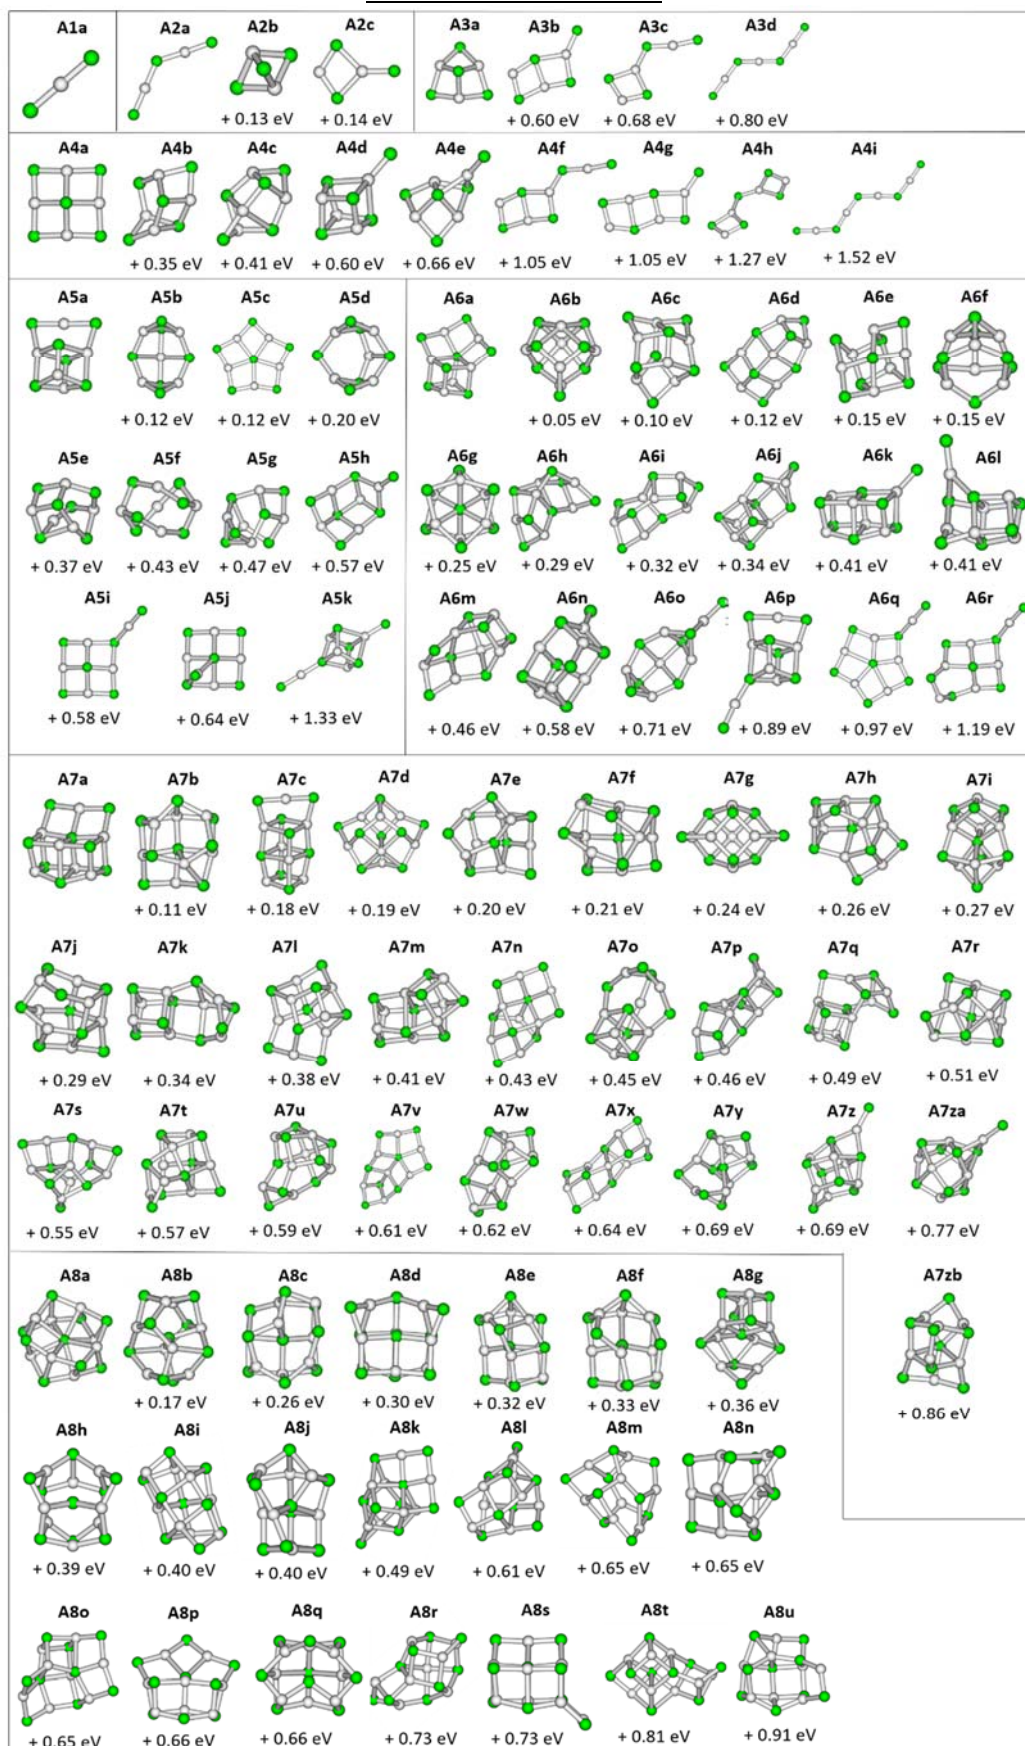

**Figure S3:** Overview of the lowest-energy isomers with relative energies calculated at the CCSD/DZ//B3LYP-D3 level of theory for the anionic clusters  $(\text{NaCl})_x\text{Na}^+$  with  $x = 1-8$ .

**Table S2:** Overview of the lowest-energy isomers including symmetry groups and relative energies of (NaCl)<sub>x</sub>Cl<sup>-</sup>. Isomers whose energy is marked with \* have one imaginary frequency within the listed symmetry group and thus, the listed energy corresponds to a structure with lower symmetry. Imaginary frequency for given functional: i. f.

| Isomer | Symmetry Group  | B3LYP-D3/<br>aug-cc-pVDZ | CCSD/DZ//<br>B3LYP-D3 | CCSD/TZ//<br>B3LYP-D3 | CCSD(T)/TZ/<br>/B3LYP-D3 | $\omega$ B97XD/<br>aug-cc-pVDZ | CCSD/DZ//<br>$\omega$ B97XD | CCSD/TZ//<br>$\omega$ B97XD | CCSD(T)/TZ/<br>/ $\omega$ B97XD |
|--------|-----------------|--------------------------|-----------------------|-----------------------|--------------------------|--------------------------------|-----------------------------|-----------------------------|---------------------------------|
| A1a    | D <sub>∞h</sub> | 0.00                     | 0.00                  | 0.00                  | 0.00                     | 0.00                           | 0.00                        | 0.00                        | 0.00                            |
| A2a    | C <sub>2v</sub> | 0.00                     | 0.00                  | 0.00                  | 0.00                     | 0.00                           | 0.00                        | 0.00                        | 0.00                            |
| A2b    | D <sub>3h</sub> | 0.15                     | 0.13                  | 0.11                  | 0.09                     | 0.05                           | 0.14                        | 0.12                        | 0.12                            |
| A2c    | C <sub>2v</sub> | 0.13                     | 0.14                  | 0.15                  | 0.14                     | 0.11                           | 0.17                        | 0.16                        | 0.16                            |
| A3a    | C <sub>3v</sub> | 0.00                     | 0.00                  | 0.00                  | 0.00                     | 0.00                           | 0.00                        | 0.00                        | 0.00                            |
| A3b    | C <sub>s</sub>  | 0.58                     | 0.60                  | 0.59                  | 0.60                     | 0.64                           | 0.58                        | 0.59                        | 0.59                            |
| A3c    | C <sub>s</sub>  | 0.68                     | 0.68                  | 0.66                  | 0.68                     | 0.72                           | 0.64                        | 0.65                        | 0.65                            |
| A3d    | C <sub>2h</sub> | 0.80                     | 0.80                  | 0.77                  | 0.80                     | 0.87                           | 0.73                        | 0.75                        | 0.75                            |
| A4a    | C <sub>4v</sub> | 0.00                     | 0.00                  | 0.00                  | 0.00                     | 0.00                           | 0.00                        | 0.00                        | 0.00                            |
| A4b    | C <sub>2</sub>  | 0.27                     | 0.35                  | 0.34                  | 0.33                     | 0.31                           | 0.35                        | 0.34                        | 0.34                            |
| A4c    | C <sub>s</sub>  | 0.28                     | 0.41                  | 0.39                  | 0.38                     | 0.28                           | 0.37                        | 0.35                        | 0.35                            |
| A4d    | C <sub>3v</sub> | 0.47                     | 0.60                  | 0.63                  | 0.62                     | 0.51                           | 0.63                        | 0.62                        | 0.62                            |
| A4e    | C <sub>s</sub>  | 0.62                     | 0.66                  | 0.67                  | 0.66                     | 0.61                           | 0.68                        | 0.68                        | 0.68                            |
| A4f    | C <sub>s</sub>  | 1.09                     | 1.05                  | 1.02                  | 1.03                     | 1.07*                          | 1.01*                       | 1.02*                       | 1.02*                           |
| A4g    | C <sub>s</sub>  | 1.05                     | 1.05                  | 1.03                  | 1.04                     | 1.05*                          | 1.02*                       | 1.03*                       | 1.03*                           |
| A4h    | C <sub>s</sub>  | 1.31                     | 1.27                  | 1.24                  | 1.25                     | 1.27*                          | 1.23*                       | 1.24*                       | 1.24*                           |
| A4i    | C <sub>2v</sub> | 1.58                     | 1.52                  | 1.48                  | 1.51                     | 1.59                           | 1.44                        | 1.47                        | 1.47                            |
| A5a    | C <sub>2v</sub> | 0.00                     | 0.00                  | 0.00                  | 0.00                     | 0.00                           | 0.00                        | 0.00                        | 0.00                            |
| A5b    | C <sub>2v</sub> | 0.21                     | 0.12                  | 0.09                  | 0.11                     | 0.20                           | 0.06                        | 0.08                        | 0.08                            |
| A5c    | D <sub>5h</sub> | 0.21                     | 0.12                  | 0.10                  | 0.14                     | 0.28                           | 0.09                        | 0.13                        | 0.13                            |
| A5d    | C <sub>s</sub>  | 0.25                     | 0.20                  | 0.17                  | 0.19                     | i. f.                          |                             |                             |                                 |
| A5e    | C <sub>1</sub>  | 0.28                     | 0.37                  | 0.35                  | 0.35                     | 0.35                           | 0.33                        | 0.32                        | 0.32                            |
| A5f    | D <sub>3</sub>  | 0.29                     | 0.43                  | 0.42                  | 0.41                     | 0.29                           | 0.32                        | 0.30                        | 0.30                            |
| A5g    | C <sub>1</sub>  | 0.40                     | 0.47                  | 0.44                  | 0.43                     | 0.34                           | 0.39                        | 0.38                        | 0.38                            |
| A5h    | C <sub>s</sub>  | 0.63                     | 0.57                  | 0.55                  | 0.58                     | 0.70                           | 0.53                        | 0.56                        | 0.56                            |
| A5i    | C <sub>s</sub>  | 0.73                     | 0.58                  | 0.54                  | 0.58                     | 0.75                           | 0.51                        | 0.54                        | 0.54                            |
| A5j    | C <sub>s</sub>  | 0.71                     | 0.64                  | 0.62                  | 0.65                     | 0.77                           | 0.62                        | 0.65                        | 0.65                            |
| A5k    | C <sub>3v</sub> | 1.32                     | 1.33                  | 1.30                  | 1.33                     | 1.40                           | 1.28                        | 1.30                        | 1.30                            |
| A6a    | C <sub>s</sub>  | 0.07                     | 0.00                  | 0.00                  | 0.00                     | 0.05                           | 0.00                        | 0.00                        | 0.00                            |
| A6b    | C <sub>2v</sub> | 0.00                     | 0.05                  | 0.04                  | 0.03                     | 0.09                           | 0.06                        | 0.05                        | 0.04                            |
| A6c    | C <sub>s</sub>  | 0.02                     | 0.10                  | 0.09                  | 0.07                     | 0.00                           | 0.09                        | 0.09                        | 0.08                            |
| A6d    | C <sub>s</sub>  | 0.30                     | 0.12                  | 0.08                  | 0.09                     | 0.20                           | 0.08                        | 0.08                        | 0.08                            |
| A6e    | C <sub>1</sub>  | 0.05                     | 0.15                  | 0.13                  | 0.11                     | 0.03                           | 0.13                        | 0.10                        | 0.10                            |
| A6f    | C <sub>3v</sub> | 0.03                     | 0.15                  | 0.14                  | 0.12                     | 0.09                           | 0.10                        | 0.08                        | 0.08                            |
| A6g    | D <sub>3d</sub> | 0.22                     | 0.25                  | 0.25                  | 0.19                     | 0.12                           | 0.26                        | 0.21                        | 0.21                            |
| A6h    | C <sub>2</sub>  | 0.28                     | 0.29                  | 0.26                  | 0.24                     | 0.19                           | 0.27                        | 0.25                        | 0.25                            |
| A6i    | C <sub>1</sub>  | 0.32                     | 0.32                  | 0.29                  | 0.29                     | 0.27                           | 0.24                        | 0.24                        | 0.24                            |
| A6j    | C <sub>s</sub>  | 0.33                     | 0.34                  | 0.32                  | 0.30                     | 0.27                           | 0.30                        | 0.28                        | 0.28                            |
| A6k    | C <sub>s</sub>  | 0.36                     | 0.41                  | 0.42                  | 0.41                     | 0.37                           | 0.42                        | 0.40                        | 0.40                            |
| A6l    | C <sub>1</sub>  | 0.40                     | 0.41                  | 0.42                  | 0.41                     | i. f.                          |                             |                             |                                 |
| A6m    | C <sub>1</sub>  | 0.41                     | 0.46                  | 0.44                  | 0.42                     | 0.37                           | 0.43                        | 0.41                        | 0.41                            |
| A6n    | C <sub>s</sub>  | 0.50                     | 0.58                  | 0.58                  | 0.58                     | i. f.                          |                             |                             |                                 |
| A6o    | C <sub>s</sub>  | 0.83                     | 0.71                  | 0.69                  | 0.69                     | 0.74                           | 0.68                        | 0.68                        | 0.68                            |
| A6p    | C <sub>s</sub>  | 0.88                     | 0.89                  | 0.87                  | 0.87                     | 0.84                           | 0.85                        | 0.84                        | 0.84                            |
| A6q    | C <sub>s</sub>  | 1.10                     | 0.97                  | 0.93                  | 0.96                     | 1.07*                          | 0.89*                       | 0.92*                       | 0.92*                           |
| A6r    | C <sub>1</sub>  | 1.31                     | 1.19                  | 1.14                  | 1.16                     | i. f.                          |                             |                             |                                 |

| Isomer | Symmetry Group  | B3LYP-D3/<br>aug-cc-pVDZ | CCSD/DZ//<br>B3LYP-D3 | CCSD/TZ//<br>B3LYP-D3 | CCSD(T)/TZ/<br>/B3LYP-D3 | $\omega$ B97XD/<br>aug-cc-pVDZ | CCSD/DZ//<br>$\omega$ B97XD | CCSD/TZ//<br>$\omega$ B97XD | CCSD(T)/TZ/<br>/ $\omega$ B97XD |
|--------|-----------------|--------------------------|-----------------------|-----------------------|--------------------------|--------------------------------|-----------------------------|-----------------------------|---------------------------------|
| A7a    | C <sub>2v</sub> | 0.00                     | 0.00                  |                       |                          | 0.00                           |                             |                             |                                 |
| A7b    | C <sub>1</sub>  | 0.09                     | 0.11                  |                       |                          | 0.07                           |                             |                             |                                 |
| A7c    | C <sub>2v</sub> | 0.23                     | 0.18                  |                       |                          | 0.12                           |                             |                             |                                 |
| A7d    | C <sub>s</sub>  | 0.11                     | 0.19                  |                       |                          | 0.08*                          |                             |                             |                                 |
| A7e    | C <sub>1</sub>  | 0.11                     | 0.20                  |                       |                          | i. f.                          |                             |                             |                                 |
| A7f    | C <sub>1</sub>  | 0.17                     | 0.21                  |                       |                          | 0.08                           |                             |                             |                                 |
| A7g    | C <sub>2v</sub> | 0.24                     | 0.24                  |                       |                          | i. f.                          |                             |                             |                                 |
| A7h    | C <sub>1</sub>  | 0.28                     | 0.26                  |                       |                          | 0.24                           |                             |                             |                                 |
| A7i    | C <sub>3v</sub> | 0.23                     | 0.27                  |                       |                          | 0.16                           |                             |                             |                                 |
| A7j    | C <sub>s</sub>  | 0.23                     | 0.29                  |                       |                          | 0.25                           |                             |                             |                                 |
| A7k    | C <sub>s</sub>  | 0.49                     | 0.34                  |                       |                          | 0.34                           |                             |                             |                                 |
| A7l    | C <sub>1</sub>  | 0.32                     | 0.38                  |                       |                          | i. f.                          |                             |                             |                                 |
| A7m    | C <sub>s</sub>  | 0.40                     | 0.41                  |                       |                          | i. f.                          |                             |                             |                                 |
| A7n    | C <sub>s</sub>  | 0.55                     | 0.43                  |                       |                          | 0.48                           |                             |                             |                                 |
| A7o    | C <sub>s</sub>  | 0.41                     | 0.45                  |                       |                          | 0.30                           |                             |                             |                                 |
| A7p    | C <sub>1</sub>  | 0.62                     | 0.46                  |                       |                          | 0.45                           |                             |                             |                                 |
| A7q    | C <sub>1</sub>  | 0.52                     | 0.49                  |                       |                          | 0.48                           |                             |                             |                                 |
| A7r    | C <sub>1</sub>  | 0.48                     | 0.51                  |                       |                          | 0.41                           |                             |                             |                                 |
| A7s    | C <sub>1</sub>  | 0.56                     | 0.55                  |                       |                          | 0.52                           |                             |                             |                                 |
| A7t    | C <sub>1</sub>  | 0.53                     | 0.57                  |                       |                          | 0.44                           |                             |                             |                                 |
| A7u    | C <sub>1</sub>  | 0.56                     | 0.59                  |                       |                          | 0.54                           |                             |                             |                                 |
| A7v    | C <sub>1</sub>  | 0.92                     | 0.61                  |                       |                          | 0.75                           |                             |                             |                                 |
| A7w    | C <sub>s</sub>  | 0.62                     | 0.62                  |                       |                          | 0.58                           |                             |                             |                                 |
| A7x    | C <sub>1</sub>  | 0.77                     | 0.64                  |                       |                          | 0.60                           |                             |                             |                                 |
| A7y    | C <sub>1</sub>  | 0.62                     | 0.69                  |                       |                          | 0.67                           |                             |                             |                                 |
| A7z    | C <sub>2v</sub> | 0.73                     | 0.69                  |                       |                          | 0.78                           |                             |                             |                                 |
| A7za   | C <sub>s</sub>  | 0.78                     | 0.77                  |                       |                          | 0.78                           |                             |                             |                                 |
| A7zb   | C <sub>s</sub>  | 0.83                     | 0.86                  |                       |                          | 0.84                           |                             |                             |                                 |
| A8a    | D <sub>4d</sub> | 0.00                     | 0.00                  |                       |                          | 0.00                           |                             |                             |                                 |
| A8b    | S <sub>4</sub>  | 0.02                     | 0.17                  |                       |                          | 0.14                           |                             |                             |                                 |
| A8c    | C <sub>1</sub>  | 0.17                     | 0.26                  |                       |                          | 0.29                           |                             |                             |                                 |
| A8d    | C <sub>s</sub>  | 0.27                     | 0.30                  |                       |                          | 0.29                           |                             |                             |                                 |
| A8e    | C <sub>s</sub>  | 0.25                     | 0.32                  |                       |                          | 0.31                           |                             |                             |                                 |
| A8f    | C <sub>1</sub>  | 0.24                     | 0.33                  |                       |                          | 0.36                           |                             |                             |                                 |
| A8g    | C <sub>s</sub>  | 0.35                     | 0.36                  |                       |                          | 0.37                           |                             |                             |                                 |
| A8h    | C <sub>s</sub>  | 0.29                     | 0.39                  |                       |                          | 0.45                           |                             |                             |                                 |
| A8i    | C <sub>1</sub>  | 0.45                     | 0.40                  |                       |                          | 0.50                           |                             |                             |                                 |
| A8j    | C <sub>1</sub>  | 0.39                     | 0.40                  |                       |                          | 0.31                           |                             |                             |                                 |
| A8k    | C <sub>2v</sub> | 0.58                     | 0.49                  |                       |                          | 0.57                           |                             |                             |                                 |
| A8l    | C <sub>1</sub>  | 0.60                     | 0.61                  |                       |                          | 0.58                           |                             |                             |                                 |
| A8m    | C <sub>2</sub>  | 0.55                     | 0.65                  |                       |                          | 0.56                           |                             |                             |                                 |
| A8n    | C <sub>1</sub>  | 0.66                     | 0.65                  |                       |                          | 0.57                           |                             |                             |                                 |
| A8o    | C <sub>1</sub>  | 0.80                     | 0.65                  |                       |                          | 0.85                           |                             |                             |                                 |
| A8p    | C <sub>2v</sub> | 0.71                     | 0.66                  |                       |                          | 0.78                           |                             |                             |                                 |
| A8q    | C <sub>s</sub>  | 0.50                     | 0.66                  |                       |                          | 0.63                           |                             |                             |                                 |
| A8r    | C <sub>1</sub>  | 0.77                     | 0.73                  |                       |                          | i. f.                          |                             |                             |                                 |
| A8s    | C <sub>1</sub>  | 0.82                     | 0.73                  |                       |                          | 0.89                           |                             |                             |                                 |
| A8t    | C <sub>1</sub>  | 0.85                     | 0.81                  |                       |                          | 0.88                           |                             |                             |                                 |
| A8u    | C <sub>1</sub>  | 1.00                     | 0.91                  |                       |                          | 1.05                           |                             |                             |                                 |



### 1.3 Neutral Clusters

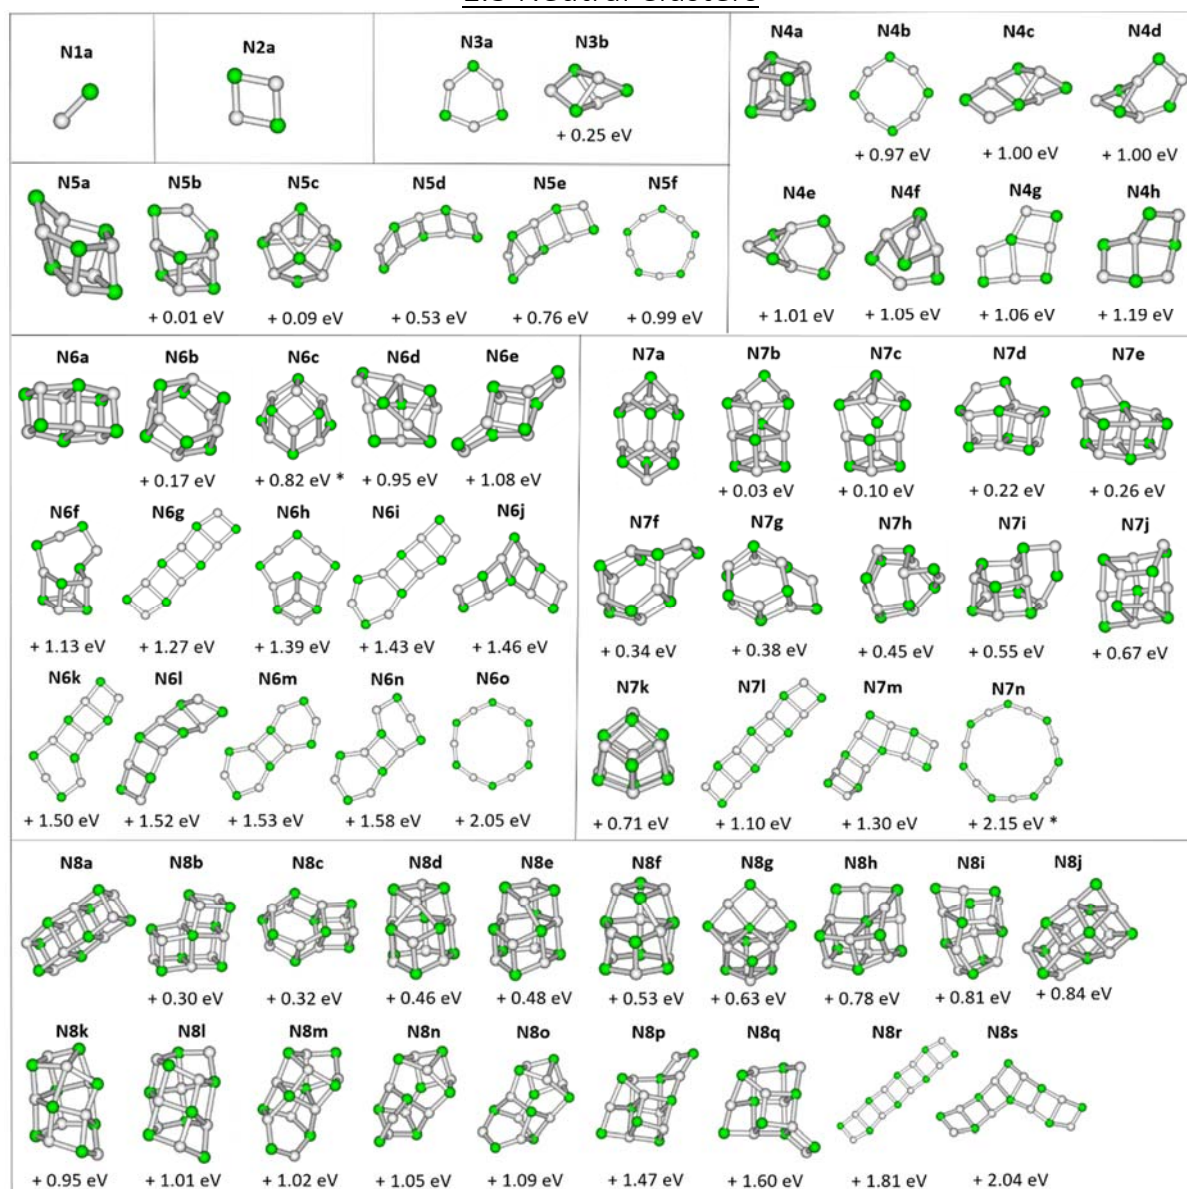

**Figure S4:** Overview of the lowest energy isomers with relative energies calculated at the CCSD/DZ//B3LYP-D3 level of theory for the neutral clusters  $(\text{NaCl})_x$  with  $x = 1-8$ . Energies marked with \* are obtained by using the  $\omega\text{B97XD}$  functional for the geometrical optimization due to the presence of an imaginary frequency using the B3LYP-D3 functional.

**Table S3:** Overview of the lowest energy isomers including symmetry groups and relative energies of (NaCl)<sub>x</sub>. Isomers whose energy is marked with \* have one imaginary frequency within the listed symmetry group and thus, the listed energy corresponds to a structure with lower symmetry. Imaginary frequency for given functional: i. f.

| Isomer | Symmetry Group  | B3LYP-D3/<br>aug-cc-pVDZ | CCSD/DZ//<br>B3LYP-D3 | CCSD/TZ//<br>B3LYP-D3 | CCSD(T)/TZ/<br>/B3LYP-D3 | $\omega$ B97XD/<br>aug-cc-pVDZ | CCSD/DZ//<br>$\omega$ B97XD | CCSD/TZ//<br>$\omega$ B97XD | CCSD(T)/TZ/<br>/ $\omega$ B97XD |
|--------|-----------------|--------------------------|-----------------------|-----------------------|--------------------------|--------------------------------|-----------------------------|-----------------------------|---------------------------------|
| N1a    | C <sub>∞v</sub> | 0.00                     | 0.00                  | 0.00                  | 0.00                     | 0.00                           |                             | 0.00                        | 0.00                            |
| N2a    | D <sub>2h</sub> | 0.00                     | 0.00                  | 0.00                  | 0.00                     | 0.00                           |                             | 0.00                        | 0.00                            |
| N3a    | D <sub>3h</sub> | 0.00                     | 0.00                  | 0.00                  | 0.00                     | 0.00                           |                             | 0.00                        | 0.00                            |
| N3b    | C <sub>2v</sub> | 0.27                     | 0.25                  | 0.26                  | 0.24                     | 0.14                           |                             | 0.28                        | 0.26                            |
| N4a    | T <sub>d</sub>  | 0.00                     | 0.00                  | 0.00                  | 0.00                     | 0.00                           |                             | 0.00                        | 0.00                            |
| N4b    | D <sub>4h</sub> | 0.97                     | 0.97                  | 0.90                  | 0.94                     | 1.09                           |                             | 0.82                        | 0.86                            |
| N4c    | C <sub>s</sub>  | 0.97                     | 1.00                  | 0.95                  | 0.95                     | 0.96                           |                             | 0.89                        | 0.90                            |
| N4d    | C <sub>s</sub>  | 0.97                     | 1.00                  | 0.96                  | 0.97                     | 0.95                           |                             | 0.89                        | 0.90                            |
| N4e    | C <sub>2v</sub> | 0.97                     | 1.01                  | 0.98                  | 0.99                     | 1.02                           |                             | 0.93                        | 0.94                            |
| N4f    | C <sub>s</sub>  | 0.98                     | 1.05                  | 1.02                  | 1.02                     | i. f.                          |                             |                             |                                 |
| N4g    | C <sub>2v</sub> | 1.00                     | 1.06                  | 1.00                  | 1.03                     | 1.09                           |                             | 0.94                        | 0.96                            |
| N4h    | C <sub>2</sub>  | 1.09                     | 1.19                  | 1.13                  | 1.15                     | i. f.                          |                             |                             |                                 |
| N5a    | C <sub>s</sub>  | 0.00                     | 0.00                  | 0.00                  | 0.00                     | 0.00                           |                             | 0.01                        | 0.00                            |
| N5b    | C <sub>s</sub>  | 0.02                     | 0.01                  | 0.00                  | 0.01                     | 0.06*                          |                             | 0.00*                       | 0.00*                           |
| N5c    | C <sub>2v</sub> | 0.04                     | 0.09                  | 0.10                  | 0.09                     | 0.01                           |                             | 0.10                        | 0.08                            |
| N5d    | C <sub>s</sub>  | 0.73                     | 0.53                  | 0.48                  | 0.50                     | 0.62                           |                             | 0.44                        | 0.46                            |
| N5e    | C <sub>1</sub>  | 0.87                     | 0.76                  | 0.72                  | 0.73                     | 0.76                           |                             | 0.68                        | 0.68                            |
| N5f    | D <sub>5h</sub> | 1.19                     | 0.99                  | 0.91                  | 0.96                     | 1.19                           |                             | 0.86                        | 0.90                            |
| N6a    | D <sub>2h</sub> | 0.00                     | 0.00                  |                       |                          | 0.00                           | 0.00                        |                             |                                 |
| N6b    | D <sub>3d</sub> | 0.14                     | 0.17                  |                       |                          | 0.25                           | 0.13                        |                             |                                 |
| N6c    | C <sub>1</sub>  | i. f.                    |                       |                       |                          | 0.88                           | 0.82                        |                             |                                 |
| N6d    | C <sub>1</sub>  | 0.84                     | 0.95                  |                       |                          | 0.81                           |                             |                             |                                 |
| N6e    | C <sub>s</sub>  | 1.00                     | 1.08                  |                       |                          | 1.16                           |                             |                             |                                 |
| N6f    | C <sub>s</sub>  | 1.12                     | 1.13                  |                       |                          | 1.18                           |                             |                             |                                 |
| N6g    | C <sub>2</sub>  | 1.53                     | 1.27                  |                       |                          | 1.40                           |                             |                             |                                 |
| N6h    | C <sub>1</sub>  | 1.40                     | 1.39                  |                       |                          | 1.47                           |                             |                             |                                 |
| N6i    | C <sub>s</sub>  | 1.62                     | 1.43                  |                       |                          | i. f.                          |                             |                             |                                 |
| N6j    | C <sub>2</sub>  | 1.65                     | 1.46                  |                       |                          | 1.58                           |                             |                             |                                 |
| N6k    | C <sub>s</sub>  | 1.66                     | 1.50                  |                       |                          | 1.63                           |                             |                             |                                 |
| N6l    | C <sub>1</sub>  | 1.67                     | 1.52                  |                       |                          | 1.55                           |                             |                             |                                 |
| N6m    | C <sub>s</sub>  | 1.66                     | 1.53                  |                       |                          | i. f.                          |                             |                             |                                 |
| N6n    | C <sub>s</sub>  | 1.68                     | 1.58                  |                       |                          | 1.74                           |                             |                             |                                 |
| N6o    | D <sub>6h</sub> | 2.34                     | 2.05                  |                       |                          | 2.30                           |                             |                             |                                 |
| N7a    | C <sub>3v</sub> | 0.01                     | 0.00                  |                       |                          | 0.08                           | 0.00                        |                             |                                 |
| N7b    | C <sub>s</sub>  | 0.00                     | 0.03                  |                       |                          | 0.00                           | 0.06                        |                             |                                 |
| N7c    | C <sub>s</sub>  | 0.00                     | 0.10                  |                       |                          | 0.00                           | 0.13                        |                             |                                 |
| N7d    | C <sub>s</sub>  | 0.24                     | 0.22                  |                       |                          | 0.24                           |                             |                             |                                 |
| N7e    | C <sub>s</sub>  | 0.26                     | 0.26                  |                       |                          | 0.26                           |                             |                             |                                 |
| N7f    | C <sub>s</sub>  | 0.32                     | 0.34                  |                       |                          | i. f.                          |                             |                             |                                 |
| N7g    | C <sub>1</sub>  | 0.43                     | 0.38                  |                       |                          | i. f.                          |                             |                             |                                 |
| N7h    | C <sub>s</sub>  | 0.35                     | 0.45                  |                       |                          | 0.39                           |                             |                             |                                 |
| N7i    | C <sub>s</sub>  | 0.48                     | 0.55                  |                       |                          | 0.54                           |                             |                             |                                 |
| N7j    | C <sub>1</sub>  | 0.52                     | 0.67                  |                       |                          | 0.54                           |                             |                             |                                 |
| N7k    | C <sub>3v</sub> | 0.41                     | 0.71                  |                       |                          | 0.29                           |                             |                             |                                 |

| Isomer | Symmetry Group  | B3LYP-D3/<br>aug-cc-pVDZ | CCSD/DZ//<br>B3LYP-D3 | CCSD/TZ//<br>B3LYP-D3 | CCSD(T)/TZ/<br>/B3LYP-D3 | $\omega$ B97XD/<br>aug-cc-pVDZ | CCSD/DZ//<br>$\omega$ B97XD | CCSD/TZ//<br>$\omega$ B97XD | CCSD(T)/TZ/<br>/ $\omega$ B97XD |
|--------|-----------------|--------------------------|-----------------------|-----------------------|--------------------------|--------------------------------|-----------------------------|-----------------------------|---------------------------------|
| N7l    | C <sub>2v</sub> | 1.50                     | 1.10                  |                       |                          | 1.25                           |                             |                             |                                 |
| N7m    | C <sub>1</sub>  | 1.62                     | 1.30                  |                       |                          | 1.42                           |                             |                             |                                 |
| N7n    | C <sub>s</sub>  |                          |                       |                       |                          | 2.49                           |                             |                             |                                 |
| N8a    | D <sub>2d</sub> | 0.00                     | 0.00                  |                       |                          | 0.00                           |                             |                             |                                 |
| N8b    | C <sub>s</sub>  | 0.17                     | 0.30                  |                       |                          | 0.27                           |                             |                             |                                 |
| N8c    | C <sub>2</sub>  | 0.25                     | 0.32                  |                       |                          | i. f.                          |                             |                             |                                 |
| N8d    | C <sub>s</sub>  | 0.35                     | 0.46                  |                       |                          | 0.48                           |                             |                             |                                 |
| N8e    | C <sub>1</sub>  | 0.36                     | 0.48                  |                       |                          | 0.47                           |                             |                             |                                 |
| N8f    | C <sub>1</sub>  | 0.41                     | 0.53                  |                       |                          | 0.53                           |                             |                             |                                 |
| N8g    | C <sub>2v</sub> | 0.53                     | 0.63                  |                       |                          | 0.59                           |                             |                             |                                 |
| N8h    | C <sub>s</sub>  | 0.61                     | 0.78                  |                       |                          | 0.74                           |                             |                             |                                 |
| N8i    | C <sub>1</sub>  | 0.65                     | 0.81                  |                       |                          | i. f.                          |                             |                             |                                 |
| N8j    | C <sub>s</sub>  | 0.64                     | 0.84                  |                       |                          | 0.74                           |                             |                             |                                 |
| N8k    | C <sub>1</sub>  | 0.71                     | 0.95                  |                       |                          | i. f.                          |                             |                             |                                 |
| N8l    | C <sub>1</sub>  | 0.81                     | 1.01                  |                       |                          | 0.90                           |                             |                             |                                 |
| N8m    | C <sub>1</sub>  | 0.87                     | 1.02                  |                       |                          | 1.04                           |                             |                             |                                 |
| N8n    | C <sub>s</sub>  | 0.82                     | 1.05                  |                       |                          | 1.01                           |                             |                             |                                 |
| N8o    | C <sub>1</sub>  | 0.87                     | 1.09                  |                       |                          | 1.06                           |                             |                             |                                 |
| N8p    | C <sub>1</sub>  | 1.32                     | 1.47                  |                       |                          | 1.40                           |                             |                             |                                 |
| N8q    | C <sub>1</sub>  | 1.38                     | 1.60                  |                       |                          | 1.51                           |                             |                             |                                 |
| N8r    | C <sub>2h</sub> | 2.24                     | 1.81                  |                       |                          | 2.01*                          |                             |                             |                                 |
| N8s    | C <sub>2</sub>  | 2.36                     | 2.04                  |                       |                          | 2.21                           |                             |                             |                                 |

## 2. Cluster Stability and Dissociation Energies

### 2.1 Dissociation of NaCl and the Atomic Ion

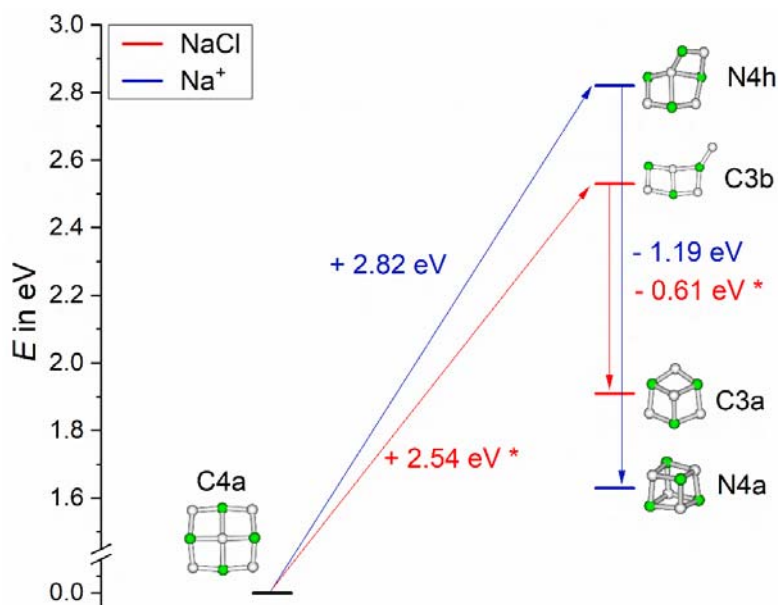

**Figure S5:** Energy scheme for the cationic magic cluster  $(\text{NaCl})_4\text{Na}^+$  when no isomerization before fragmentation is allowed. Thus, dissociation of NaCl or  $\text{Na}^+$  occurs directly from the minimum energy structure C4a and proceeds via a higher lying isomer of the product. Given energies are calculated at the CCSD/DZ//B3LYP-D3 level of theory. Energies marked with \* are obtained by using the  $\omega\text{B97XD}$  functional for the geometrical optimization due to the presence of an imaginary frequency using the B3LYP-D3 functional.

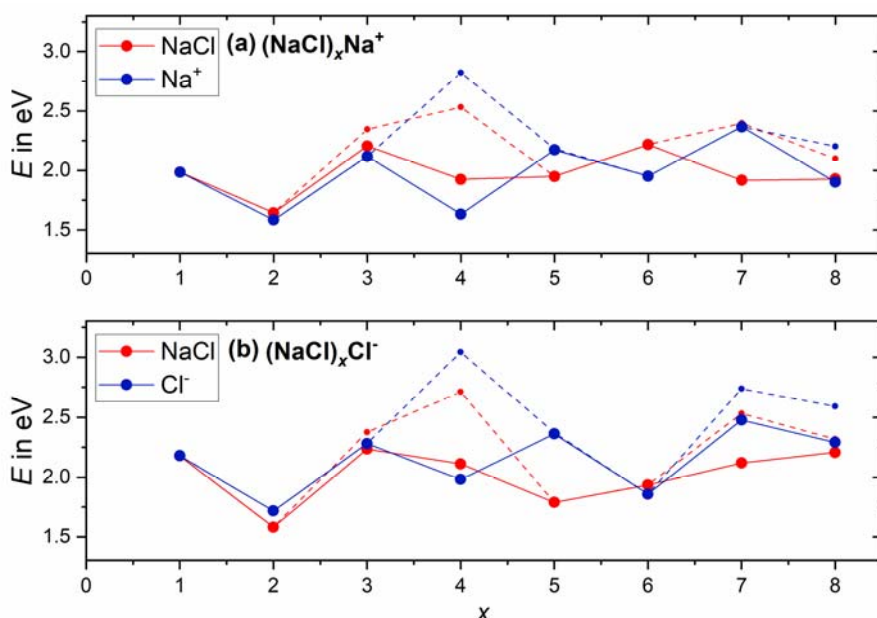

**Figure S6:** Energy needed to remove NaCl or the respective atomic ion ( $\text{Cl}^-$  and  $\text{Na}^+$ ) from the ionic clusters  $(\text{NaCl})_x\text{Cl}^-$  (a) and  $(\text{NaCl})_x\text{Na}^+$  (b). Solid lines, large symbols: isomerization before dissociation and thus, fragmentation into lowest lying product isomers, see Figure 3 for  $x = 4$ . Dashed lines, small symbols: no isomerization before dissociation, resulting in higher lying product isomers, see Figure S5 for  $x = 4$ . Given energies are calculated at the CCSD/DZ//B3LYP-D3 level of theory.

## 2.1 Benchmarking Dissociation Energies

The dissociation energies of the loss channels described by equation (2), (3) and (4) are plotted in Figure S7. All Methods used in Table S4, Figure S7 and Figure 4 provide similar results. The dissociation energies calculated with CCSD(T)/TZ//B3LYP-D3 (Figure S7: lower-left) and CCSD(T)/TZ// $\omega$ B97XD (Figure S7: lower-right) are almost identical, reflecting the insensitivity of the results to the method employed. For CCSD(T), only ions up to  $x = 6$  and neutrals up to  $x = 5$  are calculated.

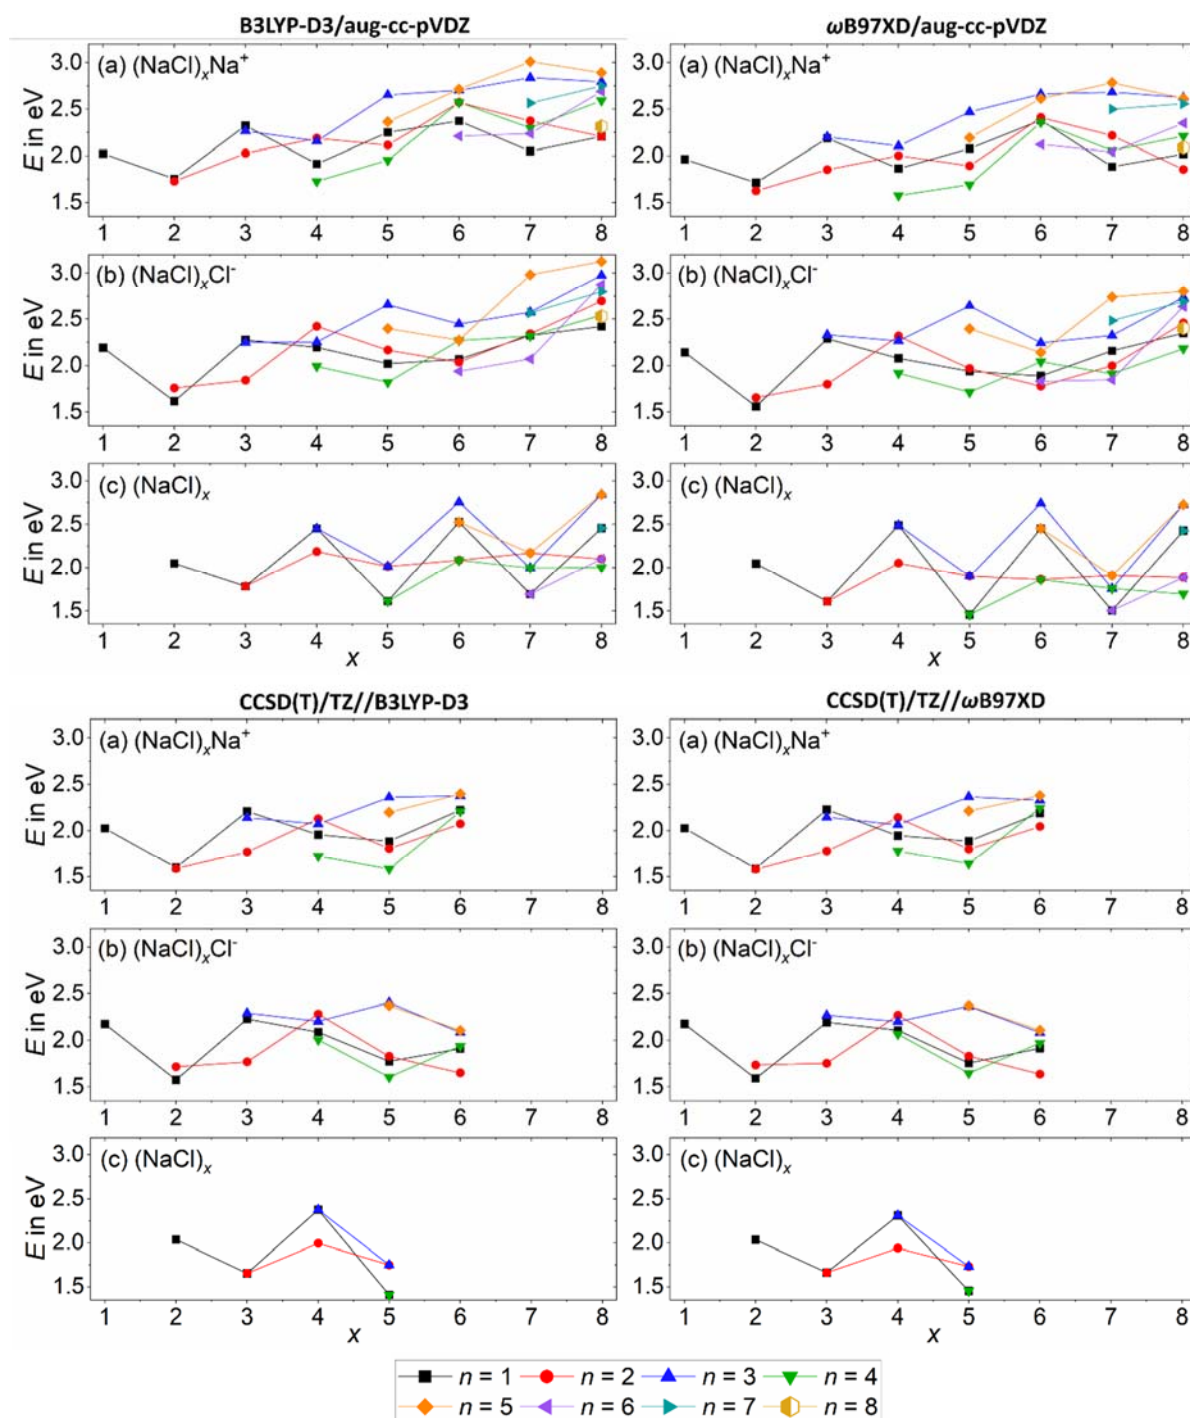

**Figure S7:** Dissociation energies of the a) cations, reaction (2); b) anions, reaction (3) and c) neutrals, reaction (4) as a function of cluster size  $x$ . Dissociation from the lowest energy isomer of the precursor to the lowest energy isomer of the products is assumed, including isomerization of the precursor. Calculations are performed at the B3LYP-D3/aug-cc-pVDZ (upper-left), the  $\omega$ B97XD/aug-cc-pVDZ

(upper-right), the CCSD(T)/TZ//B3LYP-D3 (lower-left) and the CCSD(T)/TZ// $\omega$ B97XD (lower-right) level of theory.

**Table S4:** Dissociation energies for the loss channels (2), (3) and (4) of the cationic, anionic and neutral clusters, respectively. The energies are calculated by considering the minimum energy structures of reactant and products.

| Charge                              | $x$ | $n$ | B3LYP-D3/<br>aug-cc-pVDZ | CCSD/DZ//<br>B3LYP-D3 | CCSD/TZ//<br>B3LYP-D3 | CCSD(T)/TZ/<br>/B3LYP-D3 | $\omega$ B97XD/<br>aug-cc-pVDZ | CCSD/TZ//<br>$\omega$ B97XD | CCSD(T)/TZ/<br>/ $\omega$ B97XD |
|-------------------------------------|-----|-----|--------------------------|-----------------------|-----------------------|--------------------------|--------------------------------|-----------------------------|---------------------------------|
| (NaCl) <sub>x</sub> Na <sup>+</sup> | 1   | 1   | 2.02                     | 1.98                  | 2.03                  | 2.03                     | 1.96                           | 2.03                        | 2.03                            |
|                                     | 2   | 1   | 1.75                     | 1.64                  | 1.58                  | 1.60                     | 1.71                           | 1.57                        | 1.59                            |
|                                     |     | 2   | 1.73                     | 1.58                  | 1.58                  | 1.58                     | 1.63                           | 1.57                        | 1.58                            |
|                                     | 3   | 1   | 2.32                     | 2.21                  | 2.21                  | 2.21                     | 2.19                           | 2.23                        | 2.23                            |
|                                     |     | 2   | 2.03                     | 1.81                  | 1.75                  | 1.77                     | 1.85                           | 1.76                        | 1.78                            |
|                                     |     | 3   | 2.27                     | 2.12                  | 2.13                  | 2.14                     | 2.20                           | 2.13                        | 2.14                            |
|                                     | 4   | 1   | 1.91                     | 1.92                  | 1.96                  | 1.96                     | 1.86                           | 1.95                        | 1.95                            |
|                                     |     | 2   | 2.19                     | 2.09                  | 2.13                  | 2.13                     | 2.00                           | 2.14                        | 2.14                            |
|                                     |     | 3   | 2.16                     | 2.06                  | 2.05                  | 2.07                     | 2.10                           | 2.04                        | 2.06                            |
|                                     |     | 4   | 1.73                     | 1.63                  | 1.74                  | 1.72                     | 1.58                           | 1.80                        | 1.78                            |
|                                     | 5   | 1   | 2.25                     | 1.95                  | 1.86                  | 1.89                     | 2.08                           | 1.86                        | 1.89                            |
|                                     |     | 2   | 2.11                     | 1.83                  | 1.78                  | 1.81                     | 1.89                           | 1.77                        | 1.80                            |
|                                     |     | 3   | 2.65                     | 2.36                  | 2.33                  | 2.36                     | 2.47                           | 2.34                        | 2.37                            |
|                                     |     | 4   | 1.95                     | 1.60                  | 1.57                  | 1.58                     | 1.69                           | 1.62                        | 1.64                            |
|                                     |     | 5   | 2.36                     | 2.17                  | 2.20                  | 2.20                     | 2.19                           | 2.21                        | 2.21                            |
|                                     | 6   | 1   | 2.37                     | 2.22                  | 2.19                  | 2.22                     | 2.38                           | 2.15                        | 2.19                            |
|                                     |     | 2   | 2.57                     | 2.12                  | 2.01                  | 2.07                     | 2.41                           | 1.98                        | 2.04                            |
|                                     |     | 3   | 2.70                     | 2.38                  | 2.31                  | 2.38                     | 2.66                           | 2.26                        | 2.33                            |
|                                     |     | 4   | 2.57                     | 2.17                  | 2.17                  | 2.21                     | 2.36                           | 2.21                        | 2.25                            |
|                                     |     | 5   | 2.71                     | 2.41                  | 2.35                  | 2.40                     | 2.61                           | 2.33                        | 2.38                            |
|                                     |     | 6   | 2.21                     | 1.95                  |                       |                          | 2.12                           |                             |                                 |
|                                     | 7   | 1   | 2.05                     | 1.92                  |                       |                          | 1.88                           |                             |                                 |
|                                     |     | 2   | 2.37                     | 2.09                  |                       |                          | 2.22                           |                             |                                 |
|                                     |     | 3   | 2.84                     | 2.37                  |                       |                          | 2.68                           |                             |                                 |
|                                     |     | 4   | 2.30                     | 1.88                  |                       |                          | 2.06                           |                             |                                 |
|                                     |     | 5   | 3.01                     | 2.68                  |                       |                          | 2.78                           |                             |                                 |
|                                     |     | 6   | 2.24                     | 1.88                  |                       |                          | 2.04                           |                             |                                 |
|                                     |     | 7   | 2.57                     | 2.37                  |                       |                          | 2.50                           |                             |                                 |
|                                     | 8   | 1   | 2.21                     | 1.93                  |                       |                          | 2.02                           |                             |                                 |
|                                     |     | 2   | 2.21                     | 1.80                  |                       |                          | 1.85                           |                             |                                 |
|                                     |     | 3   | 2.79                     | 2.35                  |                       |                          | 2.62                           |                             |                                 |

| Charge                                  | x | n | B3LYP-D3/<br>aug-cc-pVDZ | CCSD/DZ//<br>B3LYP-D3 | CCSD/TZ//<br>B3LYP-D3 | CCSD(T)/TZ/<br>/B3LYP-D3 | $\omega$ B97XD/<br>aug-cc-pVDZ | CCSD/TZ//<br>$\omega$ B97XD | CCSD(T)/TZ/<br>/ $\omega$ B97XD |
|-----------------------------------------|---|---|--------------------------|-----------------------|-----------------------|--------------------------|--------------------------------|-----------------------------|---------------------------------|
|                                         |   | 4 | 2.59                     | 1.88                  |                       |                          | 2.21                           |                             |                                 |
|                                         |   | 5 | 2.89                     | 2.40                  |                       |                          | 2.62                           |                             |                                 |
|                                         |   | 6 | 2.69                     | 2.17                  |                       |                          | 2.35                           |                             |                                 |
|                                         |   | 7 | 2.75                     | 2.31                  |                       |                          | 2.56                           |                             |                                 |
|                                         |   | 8 | 2.31                     | 1.90                  |                       |                          | 2.09                           |                             |                                 |
| <b>(NaCl)<sub>x</sub>Cl<sup>-</sup></b> | 1 | 1 | 2.19                     | 2.18                  | 2.18                  | 2.18                     | 2.14                           | 2.18                        | 2.18                            |
|                                         | 2 | 1 | 1.62                     | 1.58                  | 1.58                  | 1.58                     | 1.56                           | 1.59                        | 1.59                            |
|                                         |   | 2 | 1.76                     | 1.72                  | 1.73                  | 1.72                     | 1.65                           | 1.74                        | 1.74                            |
|                                         | 3 | 1 | 2.28                     | 2.24                  | 2.21                  | 2.23                     | 2.29                           | 2.17                        | 2.20                            |
|                                         |   | 2 | 1.84                     | 1.77                  | 1.75                  | 1.77                     | 1.80                           | 1.74                        | 1.75                            |
|                                         |   | 3 | 2.25                     | 2.28                  | 2.27                  | 2.29                     | 2.33                           | 2.25                        | 2.27                            |
|                                         | 4 | 1 | 2.20                     | 2.11                  | 2.09                  | 2.09                     | 2.08                           | 2.11                        | 2.11                            |
|                                         |   | 2 | 2.42                     | 2.30                  | 2.26                  | 2.28                     | 2.32                           | 2.25                        | 2.27                            |
|                                         |   | 3 | 2.25                     | 2.21                  | 2.18                  | 2.21                     | 2.27                           | 2.18                        | 2.20                            |
|                                         |   | 4 | 1.99                     | 1.98                  | 2.02                  | 2.01                     | 1.92                           | 2.08                        | 2.07                            |
|                                         | 5 | 1 | 2.02                     | 1.79                  | 1.74                  | 1.77                     | 1.94                           | 1.72                        | 1.76                            |
|                                         |   | 2 | 2.17                     | 1.86                  | 1.80                  | 1.83                     | 1.97                           | 1.80                        | 1.83                            |
|                                         |   | 3 | 2.66                     | 2.42                  | 2.34                  | 2.40                     | 2.64                           | 2.31                        | 2.37                            |
|                                         |   | 4 | 1.82                     | 1.59                  | 1.58                  | 1.60                     | 1.71                           | 1.62                        | 1.65                            |
|                                         |   | 5 | 2.40                     | 2.36                  | 2.36                  | 2.37                     | 2.40                           | 2.35                        | 2.37                            |
|                                         | 6 | 1 | 2.07                     | 1.94                  | 1.92                  | 1.91                     | 1.89                           | 1.92                        | 1.91                            |
|                                         |   | 2 | 2.04                     | 1.68                  | 1.62                  | 1.65                     | 1.78                           | 1.61                        | 1.64                            |
|                                         |   | 3 | 2.45                     | 2.12                  | 2.05                  | 2.09                     | 2.24                           | 2.05                        | 2.09                            |
|                                         |   | 4 | 2.27                     | 1.94                  | 1.91                  | 1.94                     | 2.04                           | 1.94                        | 1.97                            |
|                                         |   | 5 | 2.27                     | 2.12                  | 2.09                  | 2.11                     | 2.14                           | 2.09                        | 2.11                            |
|                                         |   | 6 | 1.94                     | 1.86                  |                       |                          | 1.83                           |                             |                                 |
|                                         | 7 | 1 | 2.33                     | 2.12                  |                       |                          | 2.16                           |                             |                                 |
|                                         |   | 2 | 2.34                     | 2.01                  |                       |                          | 2.00                           |                             |                                 |
|                                         |   | 3 | 2.58                     | 2.13                  |                       |                          | 2.32                           |                             |                                 |
|                                         |   | 4 | 2.32                     | 1.83                  |                       |                          | 1.91                           |                             |                                 |
|                                         |   | 5 | 2.98                     | 2.66                  |                       |                          | 2.74                           |                             |                                 |
|                                         |   | 6 | 2.07                     | 1.80                  |                       |                          | 1.85                           |                             |                                 |
|                                         |   | 7 | 2.57                     | 2.48                  |                       |                          | 2.48                           |                             |                                 |
|                                         | 8 | 1 | 2.42                     | 2.21                  |                       |                          | 2.35                           |                             |                                 |
|                                         |   | 2 | 2.69                     | 2.28                  |                       |                          | 2.46                           |                             |                                 |
|                                         |   | 3 | 2.98                     | 2.55                  |                       |                          | 2.73                           |                             |                                 |
|                                         |   | 4 | 2.54                     | 1.92                  |                       |                          | 2.18                           |                             |                                 |

| Charge                    | <i>x</i> | <i>n</i> | B3LYP-D3/<br>aug-cc-pVDZ | CCSD/DZ//<br>B3LYP-D3 | CCSD/TZ//<br>B3LYP-D3 | CCSD(T)/TZ/<br>/B3LYP-D3 | $\omega$ B97XD/<br>aug-cc-pVDZ | CCSD/TZ//<br>$\omega$ B97XD | CCSD(T)/TZ/<br>/ $\omega$ B97XD |
|---------------------------|----------|----------|--------------------------|-----------------------|-----------------------|--------------------------|--------------------------------|-----------------------------|---------------------------------|
|                           |          | 5        | 3.13                     | 2.63                  |                       |                          | 2.80                           |                             |                                 |
|                           |          | 6        | 2.88                     | 2.42                  |                       |                          | 2.64                           |                             |                                 |
|                           |          | 7        | 2.80                     | 2.50                  |                       |                          | 2.69                           |                             |                                 |
|                           |          | 8        | 2.53                     | 2.29                  |                       |                          | 2.40                           |                             |                                 |
| <b>(NaCl)<sub>x</sub></b> | 2        | 1        | 2.05                     | 2.04                  | 2.04                  | 2.04                     | 2.05                           | 2.03                        | 2.03                            |
|                           | 3        | 1        | 1.79                     | 1.67                  | 1.66                  | 1.65                     | 1.61                           | 1.67                        | 1.66                            |
|                           |          | 2        | 1.79                     | 1.67                  | 1.66                  | 1.65                     | 1.61                           | 1.67                        | 1.66                            |
|                           | 4        | 1        | 2.45                     | 2.41                  | 2.34                  | 2.38                     | 2.49                           | 2.28                        | 2.31                            |
|                           |          | 2        | 2.19                     | 2.04                  | 1.97                  | 1.99                     | 2.05                           | 1.91                        | 1.94                            |
|                           |          | 3        | 2.45                     | 2.41                  | 2.34                  | 2.38                     | 2.49                           | 2.28                        | 2.31                            |
|                           | 5        | 1        | 1.61                     | 1.41                  | 1.40                  | 1.41                     | 1.46                           | 1.45                        | 1.45                            |
|                           |          | 2        | 2.02                     | 1.78                  | 1.71                  | 1.75                     | 1.90                           | 1.70                        | 1.73                            |
|                           |          | 3        | 2.02                     | 1.78                  | 1.71                  | 1.75                     | 1.90                           | 1.70                        | 1.73                            |
|                           |          | 4        | 1.61                     | 1.41                  | 1.40                  | 1.41                     | 1.46                           | 1.45                        | 1.45                            |
|                           | 6        | 1        | 2.53                     | 2.44                  |                       |                          | 2.45                           |                             |                                 |
|                           |          | 2        | 2.09                     | 1.80                  |                       |                          | 1.86                           |                             |                                 |
|                           |          | 3        | 2.76                     | 2.54                  |                       |                          | 2.74                           |                             |                                 |
|                           |          | 4        | 2.09                     | 1.80                  |                       |                          | 1.86                           |                             |                                 |
|                           |          | 5        | 2.53                     | 2.44                  |                       |                          | 2.45                           |                             |                                 |
|                           | 7        | 1        | 1.70                     | 1.50                  |                       |                          | 1.51                           |                             |                                 |
|                           |          | 2        | 2.17                     | 1.90                  |                       |                          | 1.91                           |                             |                                 |
|                           |          | 3        | 2.00                     | 1.63                  |                       |                          | 1.76                           |                             |                                 |
|                           |          | 4        | 2.00                     | 1.63                  |                       |                          | 1.76                           |                             |                                 |
|                           |          | 5        | 2.17                     | 1.90                  |                       |                          | 1.91                           |                             |                                 |
|                           |          | 6        | 1.70                     | 1.50                  |                       |                          | 1.51                           |                             |                                 |
|                           | 8        | 1        | 2.46                     | 2.39                  |                       |                          | 2.43                           |                             |                                 |
|                           |          | 2        | 2.10                     | 1.85                  |                       |                          | 1.89                           |                             |                                 |
|                           |          | 3        | 2.84                     | 2.62                  |                       |                          | 2.73                           |                             |                                 |
|                           |          | 4        | 2.00                     | 1.61                  |                       |                          | 1.70                           |                             |                                 |
|                           |          | 5        | 2.84                     | 2.62                  |                       |                          | 2.73                           |                             |                                 |
|                           |          | 6        | 2.10                     | 1.85                  |                       |                          | 1.89                           |                             |                                 |
|                           |          | 7        | 2.46                     | 2.39                  |                       |                          | 2.43                           |                             |                                 |



### 3. Collision Induced Dissociation Experiments

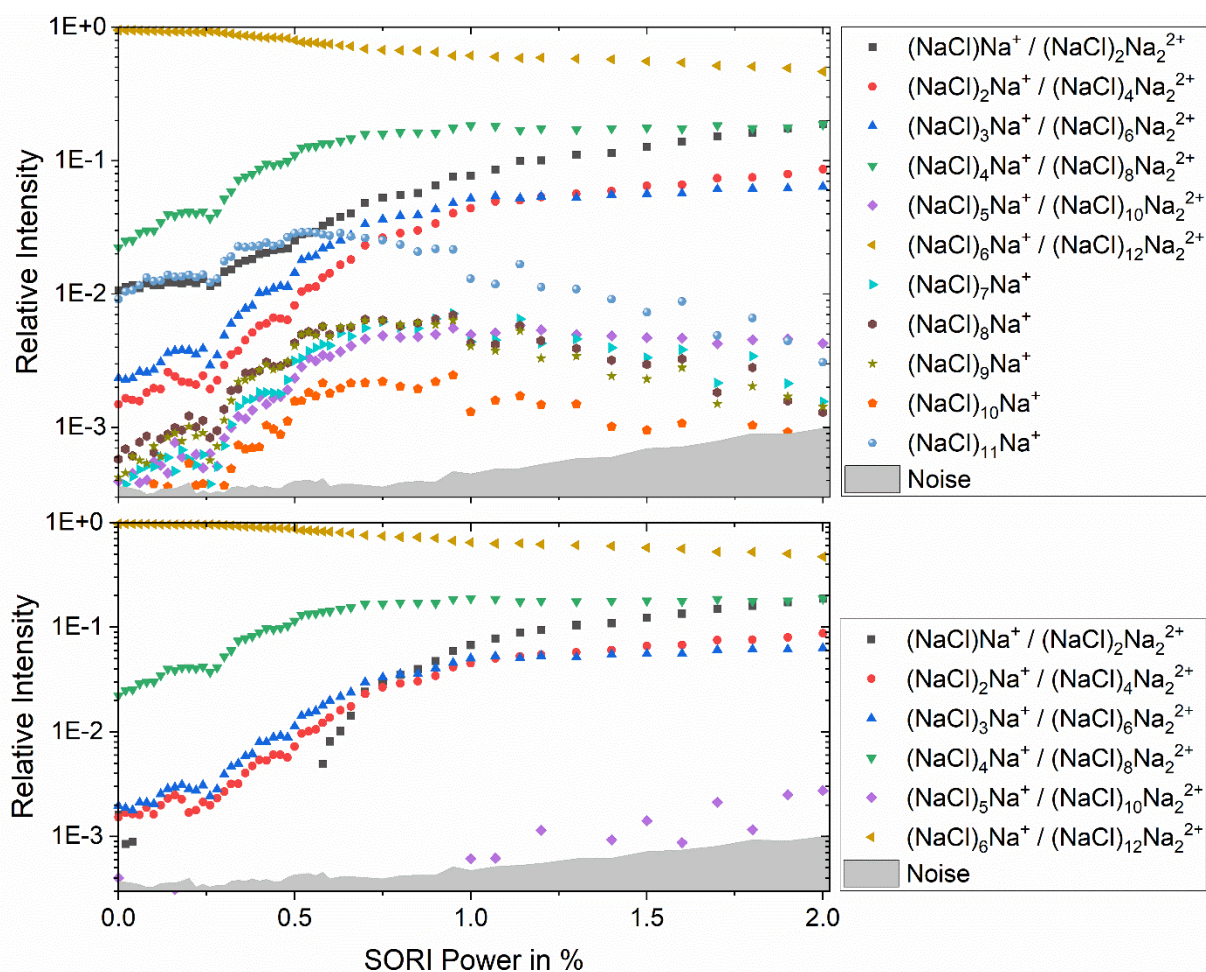

**Figure S8:** Due to an overlap of the precursor ion  $(\text{NaCl})_6\text{Na}^+$  with the doubly charged cluster  $(\text{NaCl})_{12}\text{Na}_2^{2+}$ , a correction has been made in the CID spectrum of the cluster size  $x = 6$  based on the intensities of the fragment peaks originating from the doubly charged species, which occur at higher mass to charge ratios than the precursor ion peak  $(\text{NaCl})_6\text{Na}^+ / (\text{NaCl})_{12}\text{Na}_2^{2+}$ . The loss of odd-numbered neutrals from  $(\text{NaCl})_{12}\text{Na}_2^{2+}$  is not observed, while the loss of even-numbered neutrals from  $(\text{NaCl})_{12}\text{Na}_2^{2+}$  would be overlapped with the fragment peaks of  $(\text{NaCl})_6\text{Na}^+$  and thus, cannot be ruled out. However, we assume main fragmentation of  $(\text{NaCl})_{12}\text{Na}_2^{2+}$  into two singly charged species, e.g.  $(\text{NaCl})_{12}\text{Na}_2^{2+} \rightarrow (\text{NaCl})_8\text{Na}^+ + (\text{NaCl})_4\text{Na}^+$ , whereby the intensity of the  $(\text{NaCl})_8\text{Na}^+$  peak should equal the intensity of the corresponding second product  $(\text{NaCl})_4\text{Na}^+$  originating from  $(\text{NaCl})_{12}\text{Na}_2^{2+}$ . By subtracting the intensity of one product (e.g.  $(\text{NaCl})_8\text{Na}^+$ ) - originating from  $(\text{NaCl})_{12}\text{Na}_2^{2+}$  - from the corresponding second product peak (e.g.  $(\text{NaCl})_4\text{Na}^+$ ), we correct for the contribution of the doubly charged species. Since we cannot rule out the loss of even-numbered neutrals from  $(\text{NaCl})_{12}\text{Na}_2^{2+}$ , the fragment peaks might be slightly overestimated, whereby the single contribution to each peak cannot be determined.

## 4. Statistical Analysis

### 4.1 DOS: Cations

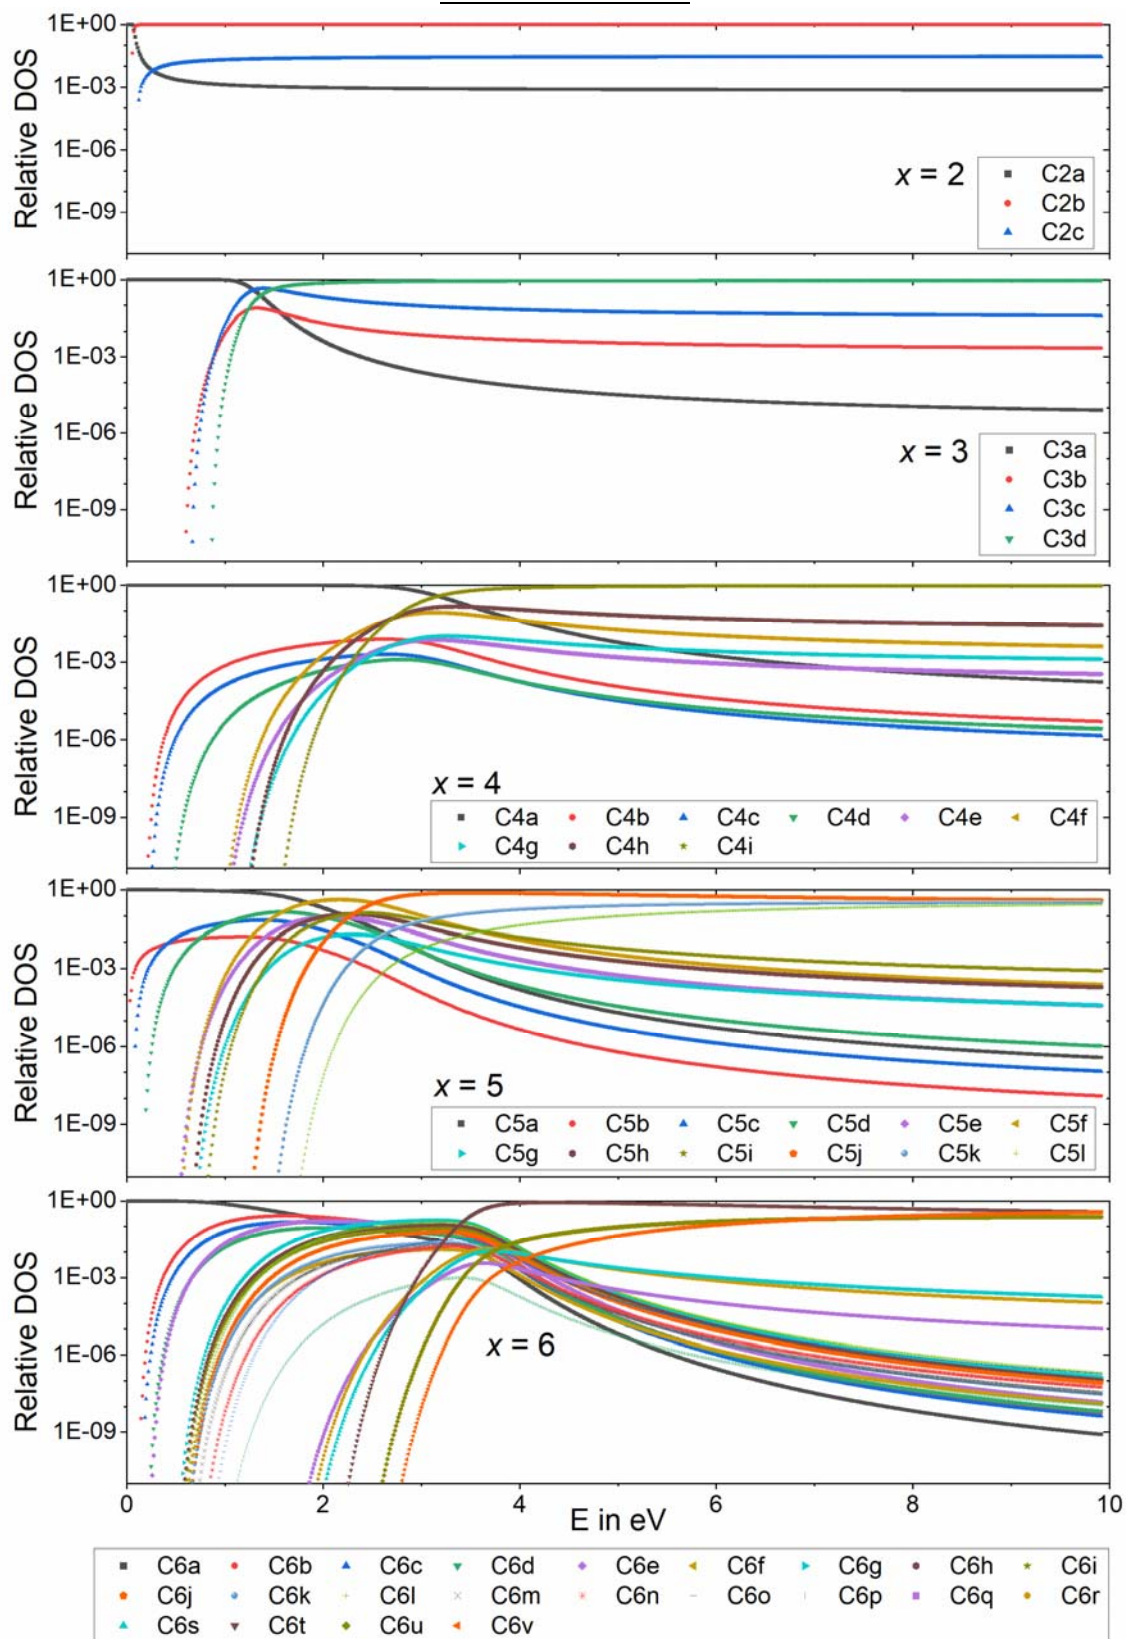

**Figure S9:** Relative DOS for the cationic clusters  $(\text{NaCl})_x\text{Na}^+$  with  $x=2-6$ , calculated at the CCSD(T)/TZ//B3LYP-D3 level of theory. The isomers C3b, C4e and C4f have one imaginary frequency using the B3LYP-D3 functional and thus, the  $\omega$ B97XD optimized frequencies and energies are used for an approximation of the DOS of these isomers.

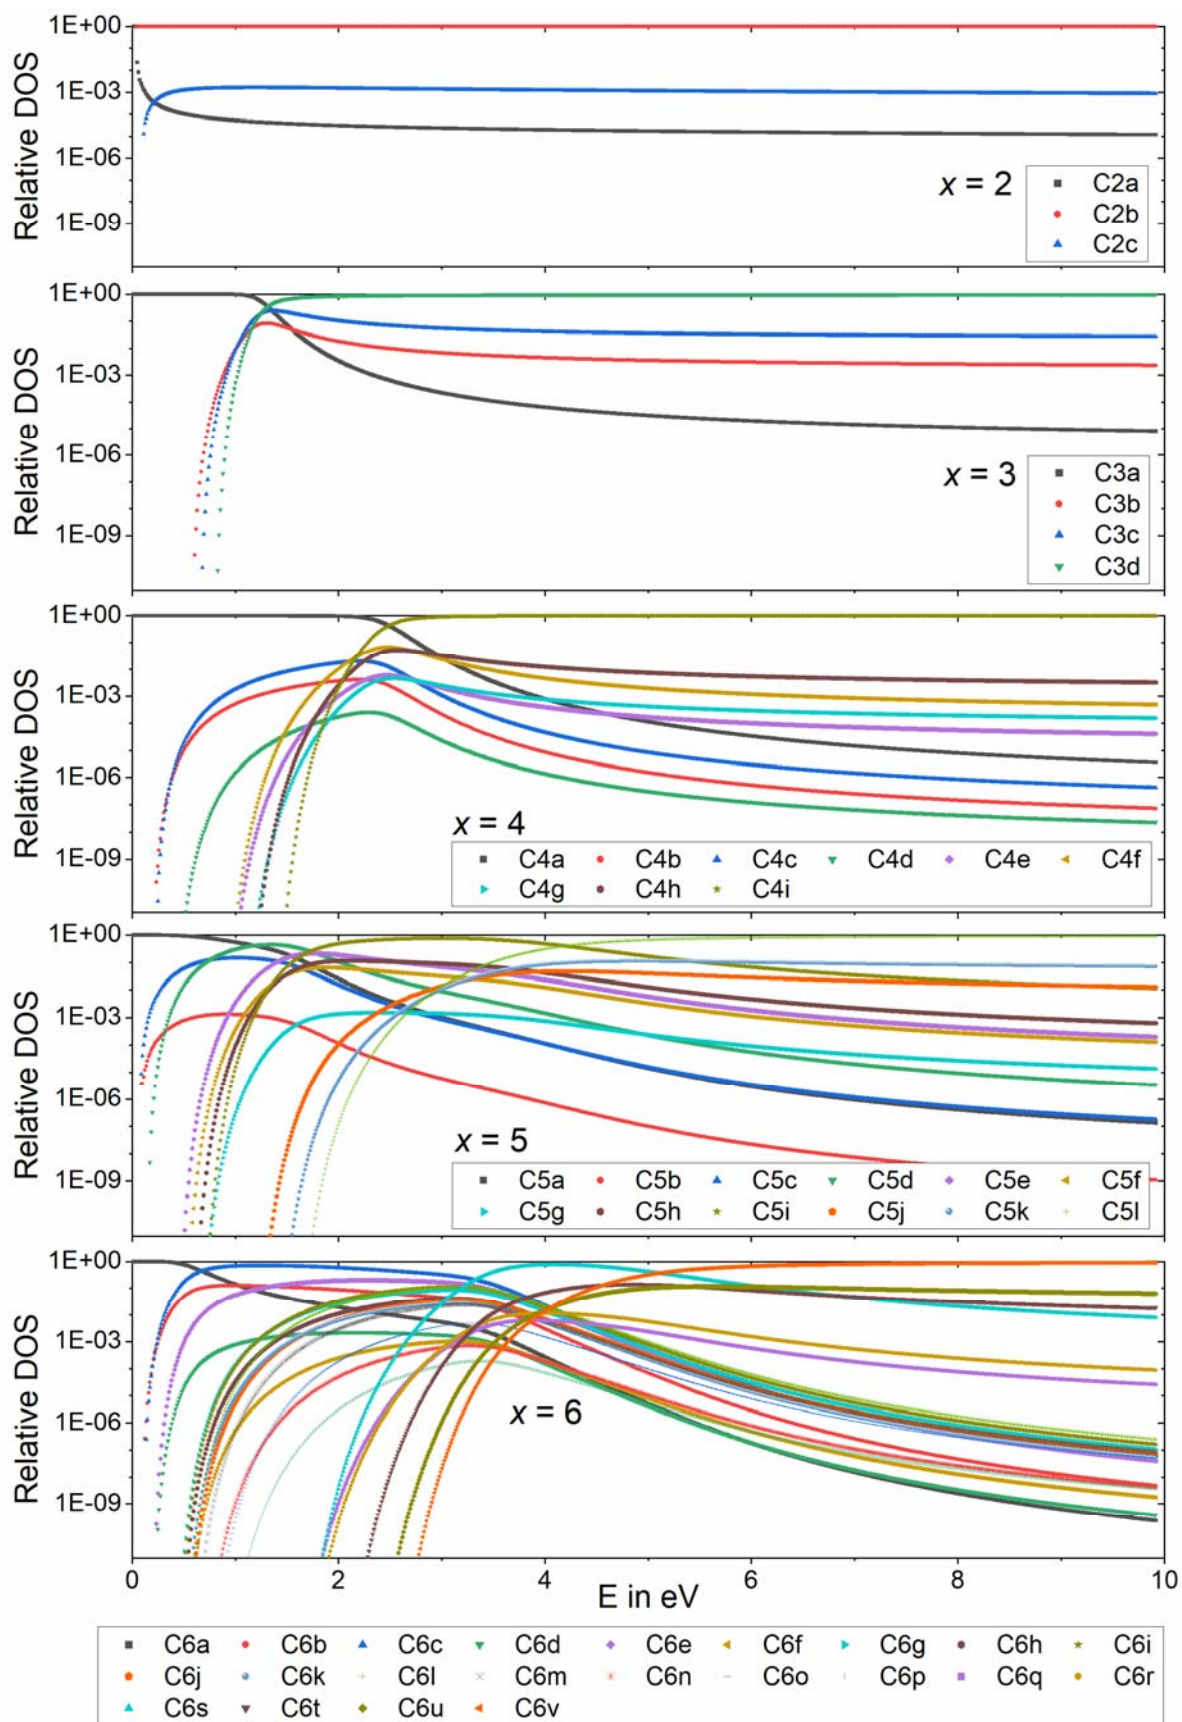

**Figure S10:** Relative DOS for the cationic clusters  $(\text{NaCl})_x\text{Na}^+$  with  $x=2-6$ , calculated at the CCSD(T)/TZ// $\omega\text{B97XD}$  level of theory. The isomers C4g, C4h, C5d, C5h, C5l, C6m, C6q and C6v have one imaginary frequency using the  $\omega\text{B97XD}$  functional and thus, the B3LYP-D3 optimized frequencies and energies are used for an approximation of the DOS of these isomers.

## 4.2 DOS: Anions

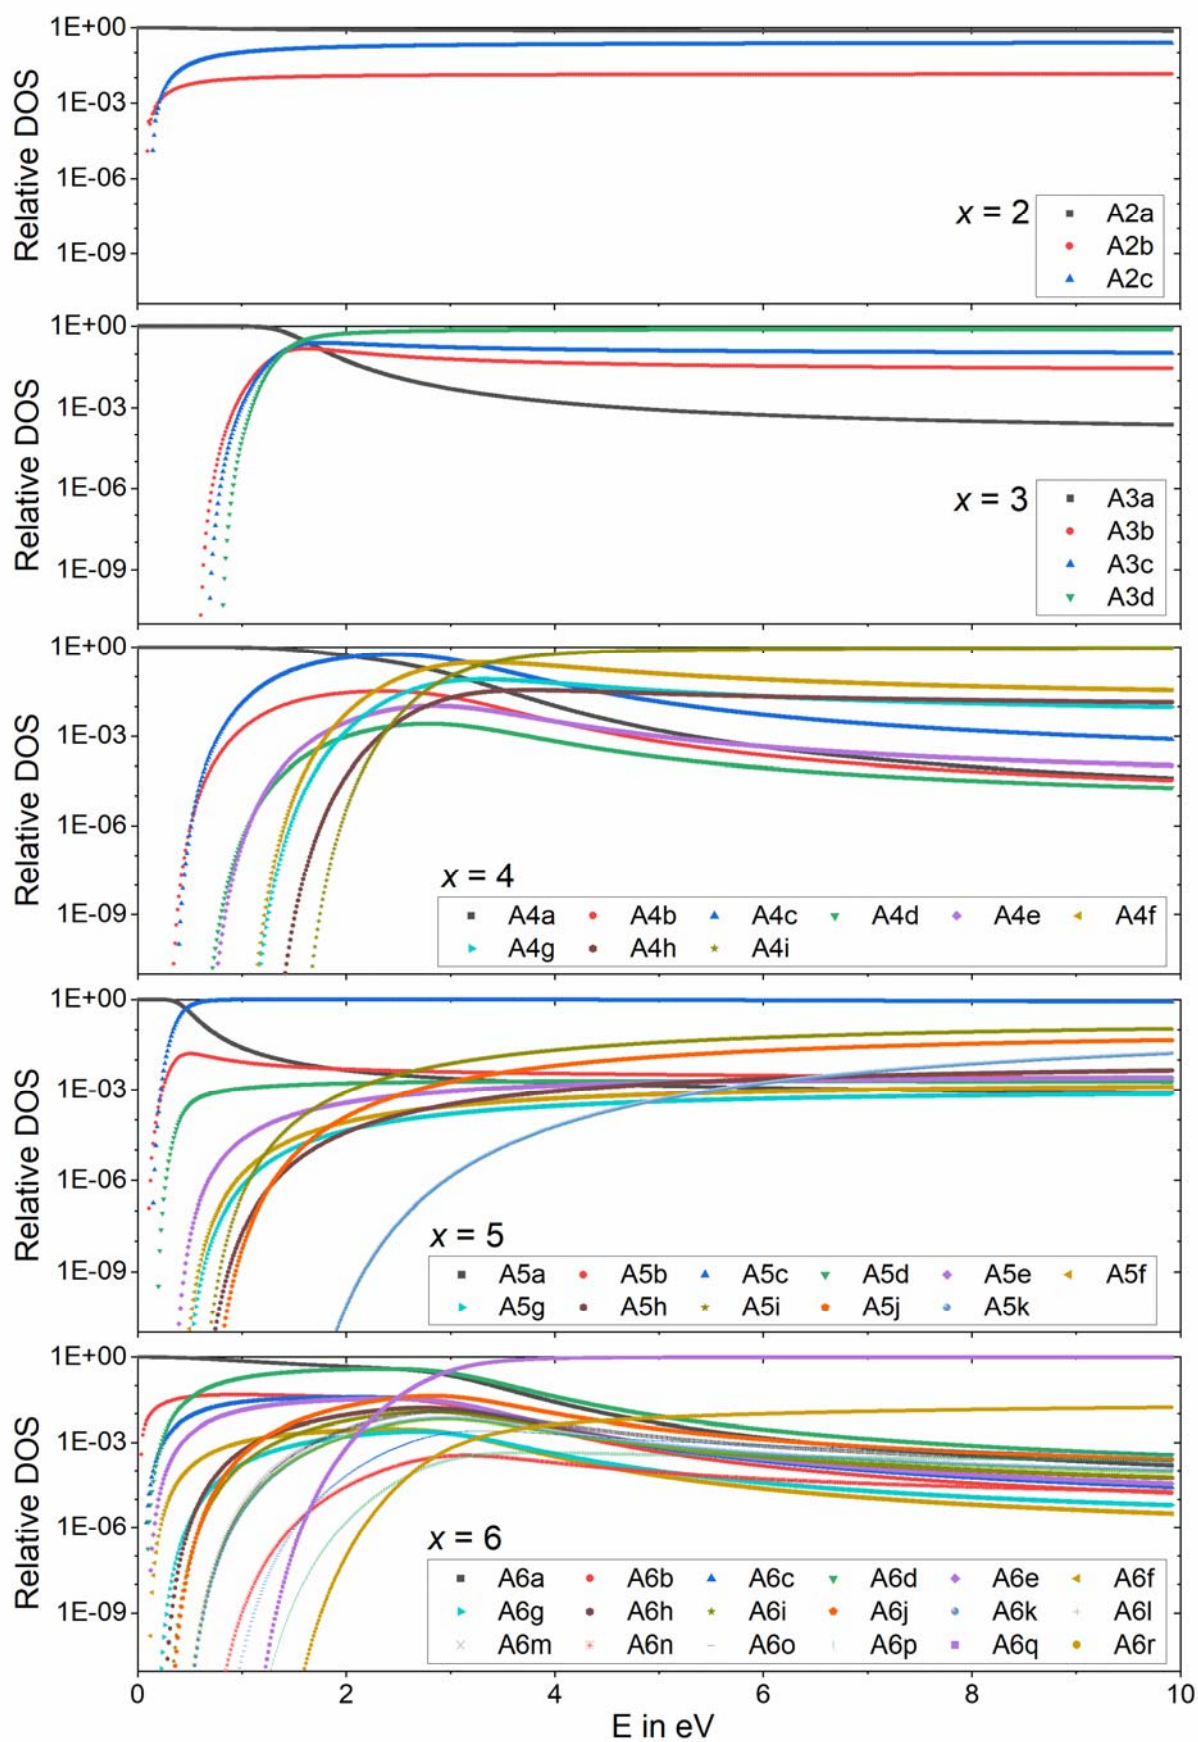

**Figure S11:** Relative DOS for the anionic clusters  $(\text{NaCl})_x\text{Cl}^-$  with  $x = 2-6$ , calculated at the CCSD(T)/TZ//B3LYP-D3 level of theory.

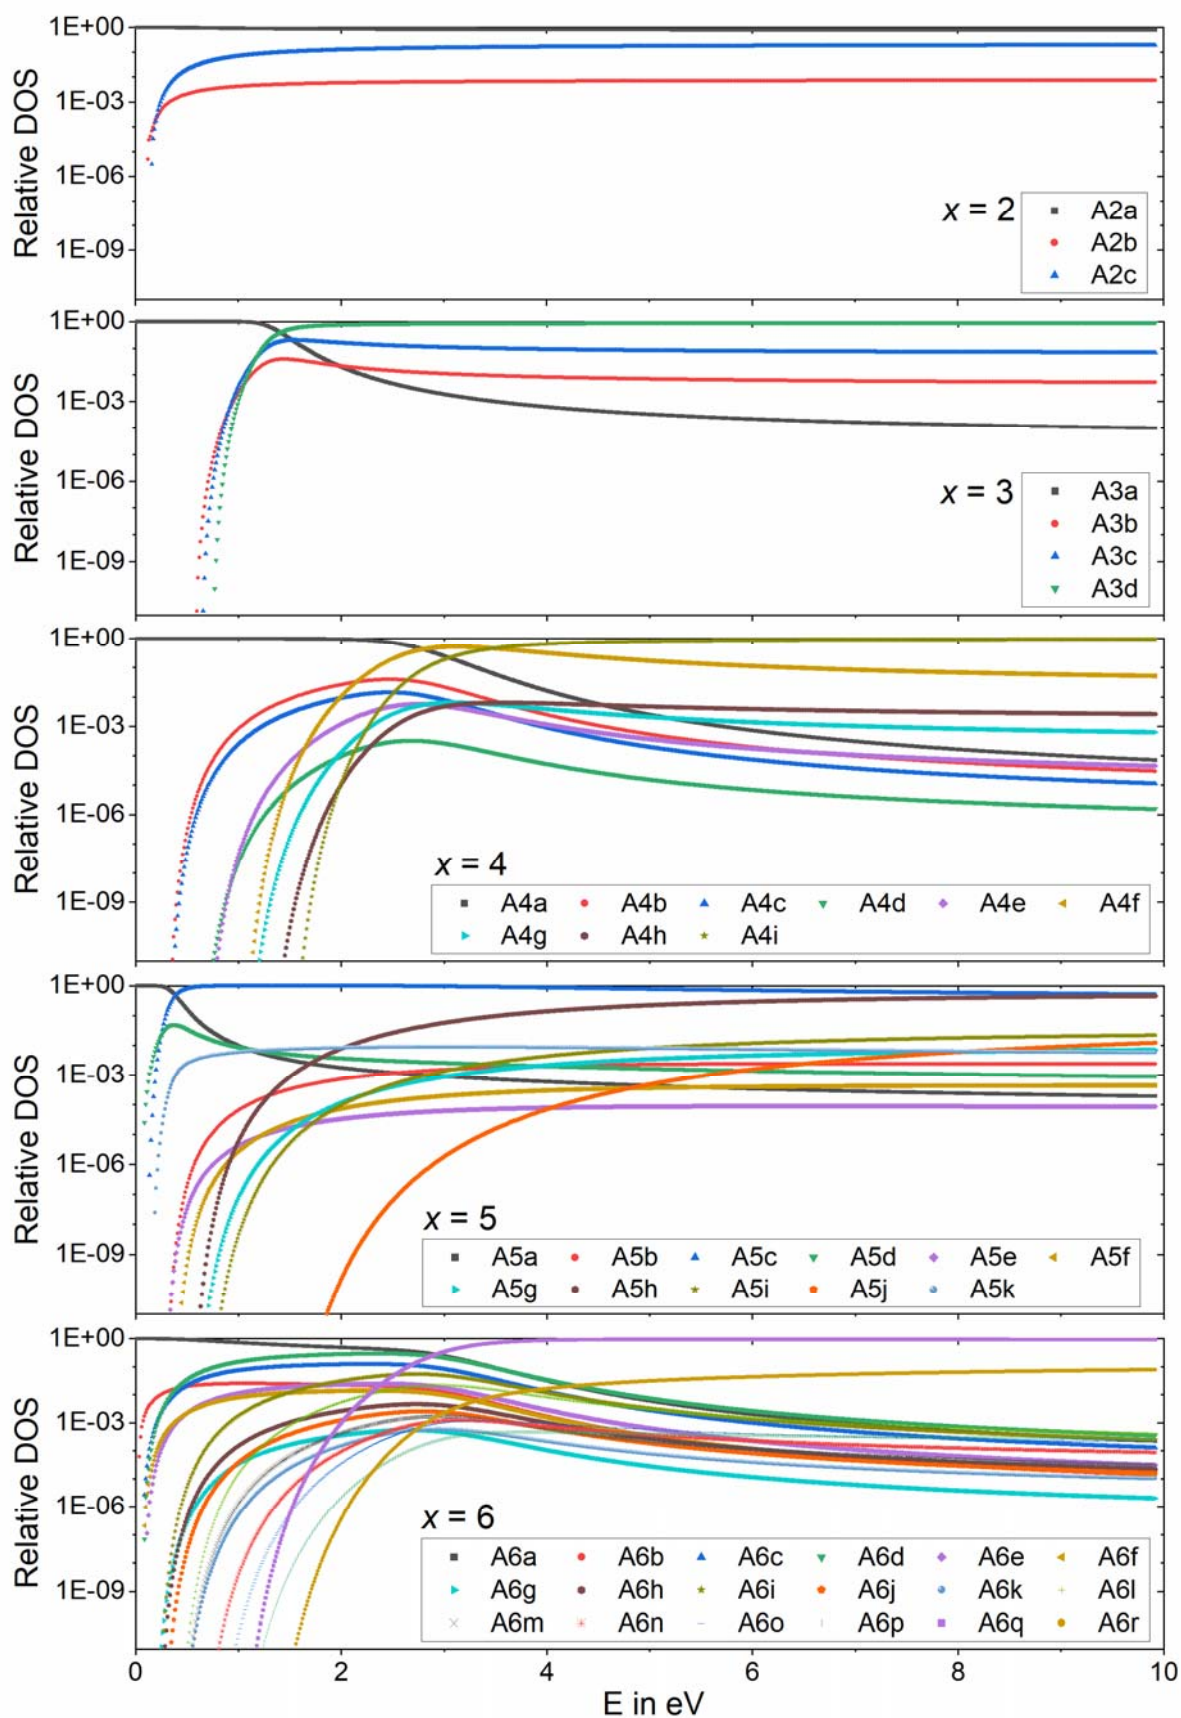

**Figure S12:** Relative DOS for the anionic clusters  $(\text{NaCl})_x\text{Cl}^-$  with  $x=2-6$ , calculated at the CCSD(T)/TZ// $\omega\text{B97XD}$  level of theory. The isomers A5d, A6l, A6n and A6r have one imaginary frequency using the  $\omega\text{B97XD}$  functional and thus, the B3LYP-D3 optimized frequencies and energies are used for an approximation of the DOS of these isomers.

### 4.3 Benchmarking RRKM Rate Constants: Cations

Figures S13-S17 show the calculated RRKM rate constants  $k_{x,n}^+$  for the loss channels (2) of the precursor ions  $(\text{NaCl})_x\text{Na}^+$  with  $x = 3-5$  (a)–(c) and the total fragmentation rate constants  $\sum_n k_{x,n}^+$  as sum of all loss channels  $n$  for cluster sizes  $x = 3-5$  (d), calculated at different levels of theory. The results are similar for aug-cc-pVDZ and aug-cc-pVTZ basis sets, see Figures S13 and S14. Furthermore, single-point calculations employing CCSD and CCSD(T) also provide similar results, see Figures S14–S17. The only factor that causes slightly different results is the functional used for the frequency and geometry optimization, see again Figures S14–S17.

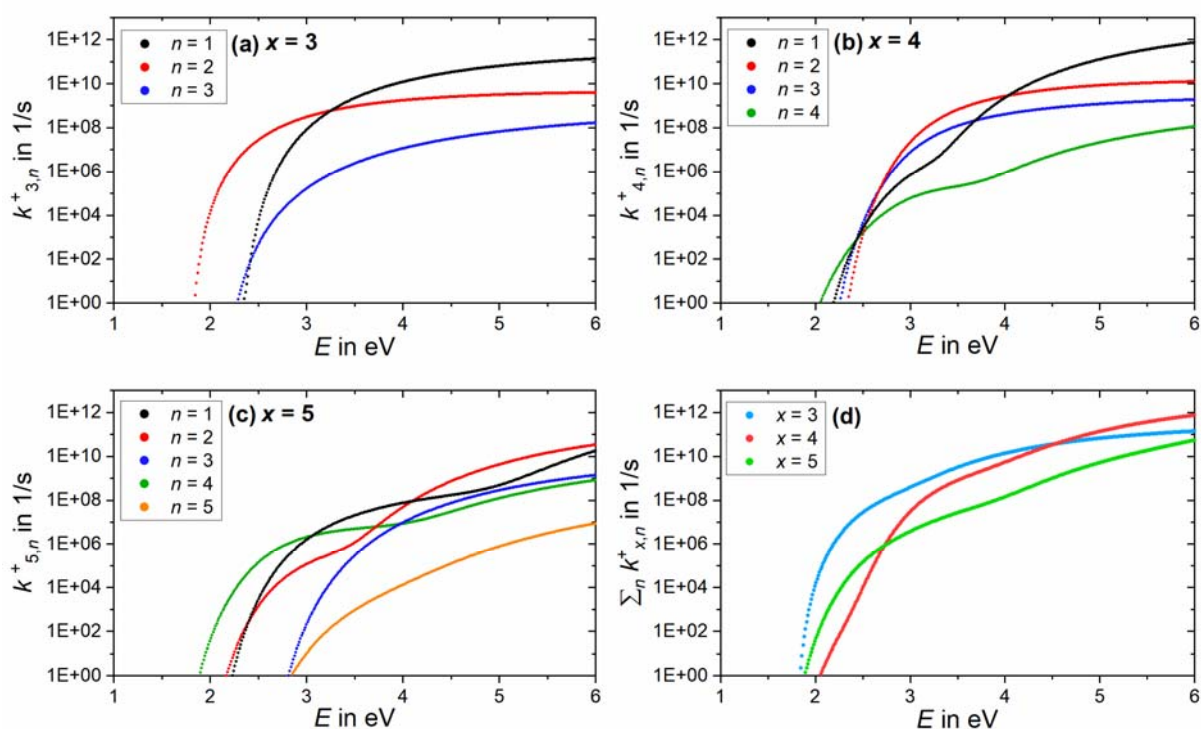

**Figure S13:** Method: CCSD/DZ//B3LYP-D3. (a)–(c) Calculated RRKM rate constants  $k_{x,n}^+$  for the loss channels (2) of the precursor ions  $(\text{NaCl})_x\text{Na}^+$  with  $x = 3-5$ . (d) Total fragmentation rate constants  $\sum_n k_{x,n}^+$  as sum of all loss channels  $n$  for cluster sizes  $x = 3-5$ .

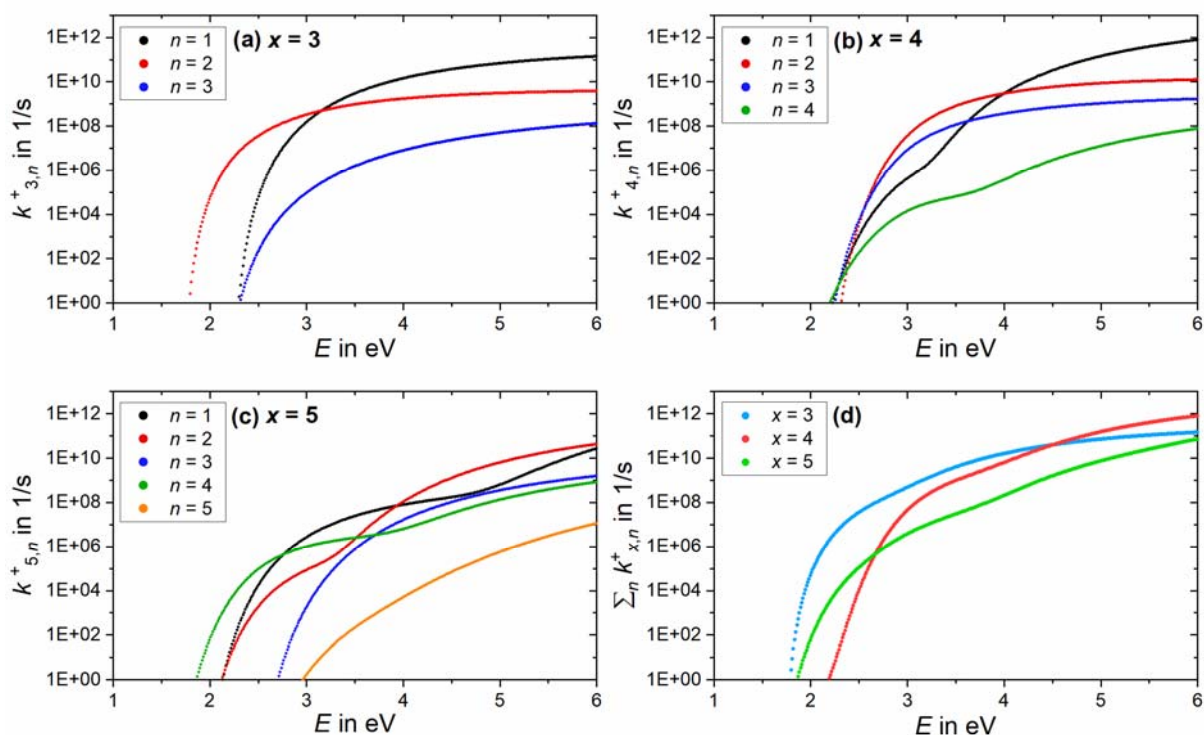

**Figure S14:** Method: CCSD/TZ//B3LYP-D3. (a)–(c) Calculated RRKM rate constants  $k_{x,n}^+$  for the loss channels (2) of the precursor ions  $(\text{NaCl})_x\text{Na}^+$  with  $x = 3$ –5. (d) Total fragmentation rate constants  $\sum_n k_{x,n}^+$  as sum of all loss channels  $n$  for cluster sizes  $x = 3$ –5.

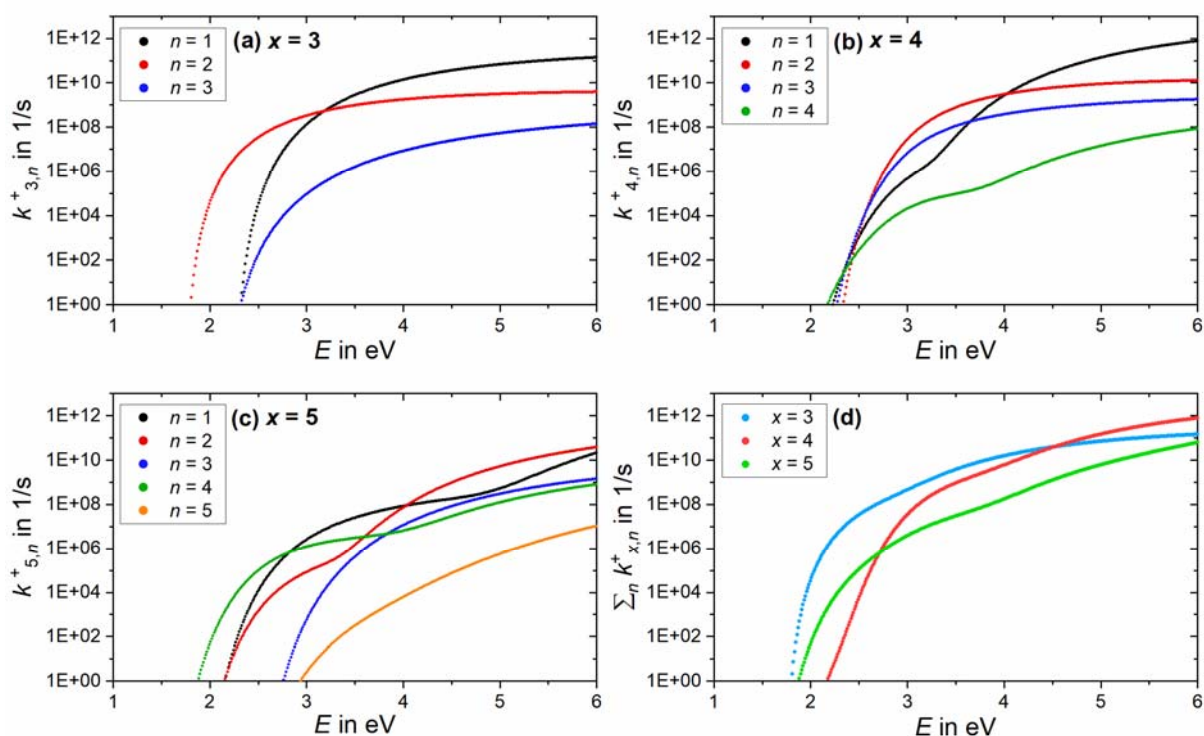

**Figure S15:** Method: CCSD(T)/TZ//B3LYP-D3. (a)–(c) Calculated RRKM rate constants  $k_{x,n}^+$  for the loss channels (2) of the precursor ions  $(\text{NaCl})_x\text{Na}^+$  with  $x = 3$ –5. (d) Total fragmentation rate constants  $\sum_n k_{x,n}^+$  as sum of all loss channels  $n$  for cluster sizes  $x = 3$ –5.

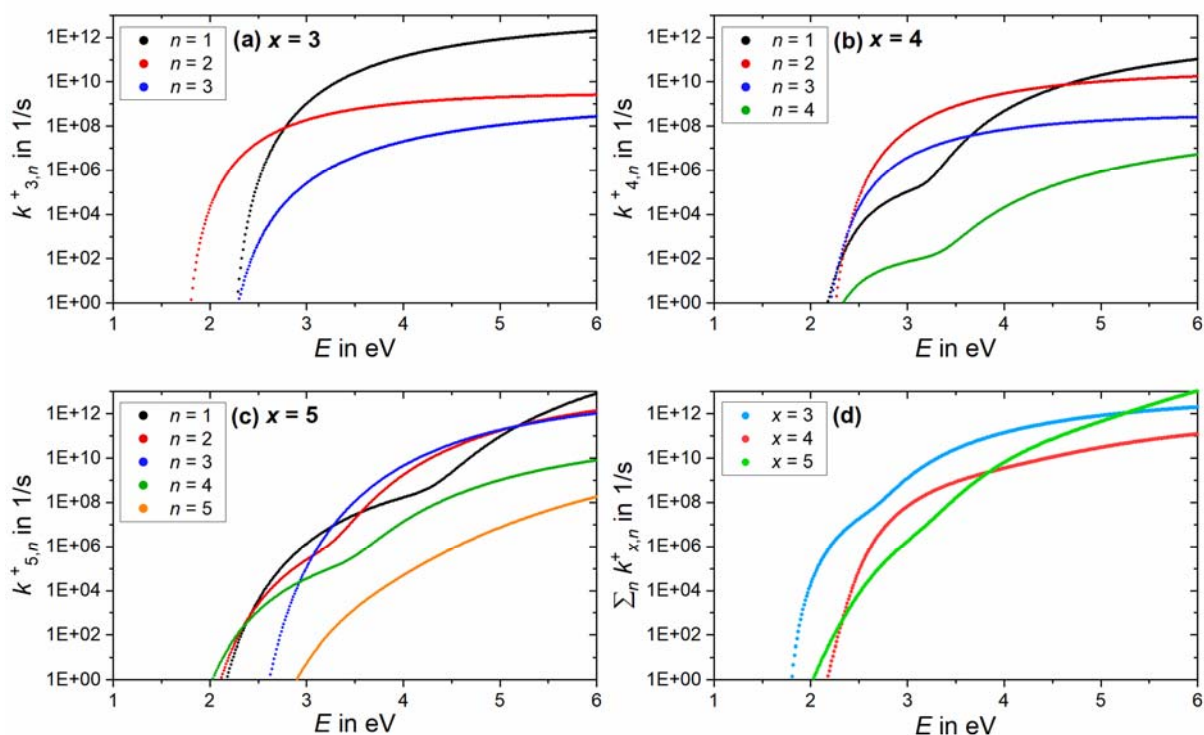

**Figure S16:** Method: CCSD/TZ// $\omega$ B97XD (a)–(c) Calculated RRKM rate constants  $k_{x,n}^+$  for the loss channels (2) of the precursor ions  $(\text{NaCl})_x\text{Na}^+$  with  $x = 3$ –5. (d) Total fragmentation rate constants  $\sum_n k_{x,n}^+$  as sum of all loss channels  $n$  for cluster sizes  $x = 3$ –5.

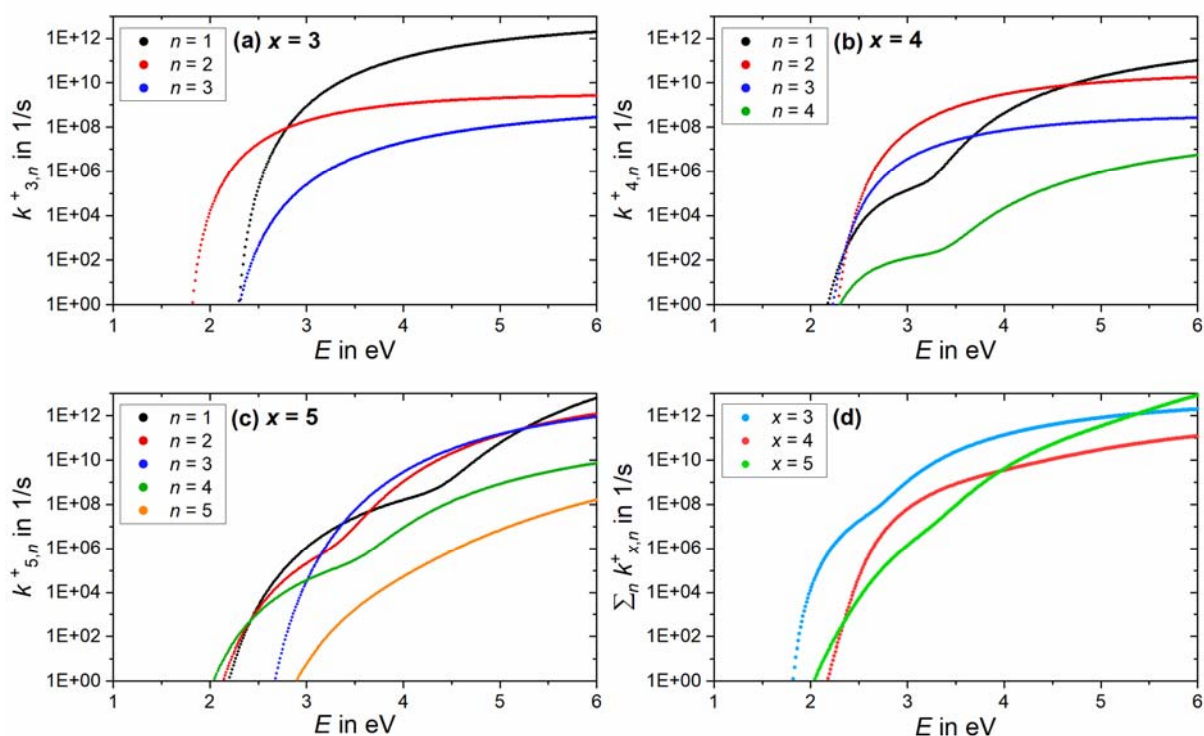

**Figure S17:** Method: CCSD(T)/TZ// $\omega$ B97XD. (a)–(c) Calculated RRKM rate constants  $k_{x,n}^+$  for the loss channels (2) of the precursor ions  $(\text{NaCl})_x\text{Na}^+$  with  $x = 3$ –5. (d) Total fragmentation rate constants  $\sum_n k_{x,n}^+$  as sum of all loss channels  $n$  for cluster sizes  $x = 3$ –5.



## 4.4 Benchmarking RRKM Rate Constants: Anions

Figures S18-S22 show the calculated RRKM rate constants  $k_{x,n}^-$  for the loss channels (3) of the precursor ions  $(\text{NaCl})_x\text{Na}^-$  with  $x = 3-5$  (a)–(c) and the total fragmentation rate constants  $\sum_n k_{x,n}^-$  as sum of all loss channels  $n$  for cluster sizes  $x = 3-5$  (d), calculated at different levels of theory. The results are similar for the basis sets aug-cc-pVDZ and aug-cc-pVTZ, see Figures S18 and S19. Furthermore, single-point calculations employing CCSD and CCSD(T) also provide similar results, see Figures S19–S22. The only factor that causes slightly different results is the functional used for the frequency and geometry optimization, see again Figures S19–S22.

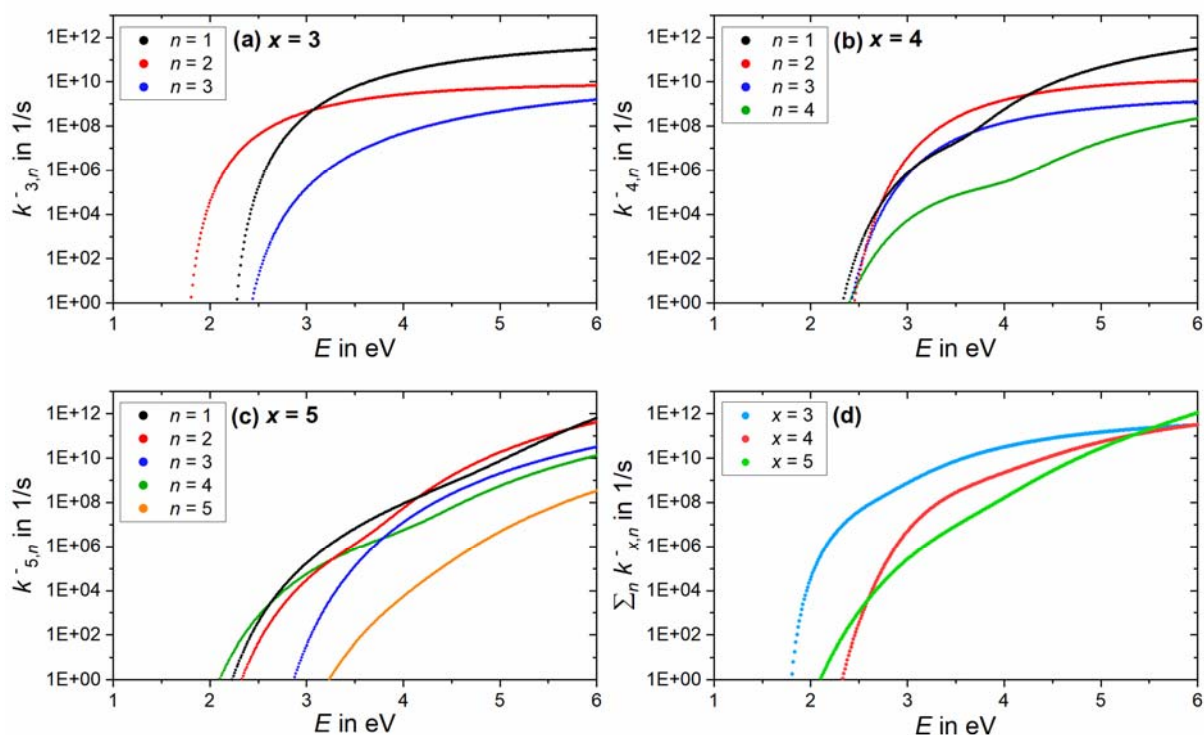

**Figure S18:** Method: CCSD/DZ//B3LYP-D3. (a)–(c) Calculated RRKM rate constants  $k_{x,n}^-$  for the loss channels (3) of the precursor ions  $(\text{NaCl})_x\text{Cl}^-$  with  $x = 3-5$ . (d) Total fragmentation rate constants  $\sum_n k_{x,n}^-$  as sum of all loss channels  $n$  for cluster sizes  $x = 3-5$ .

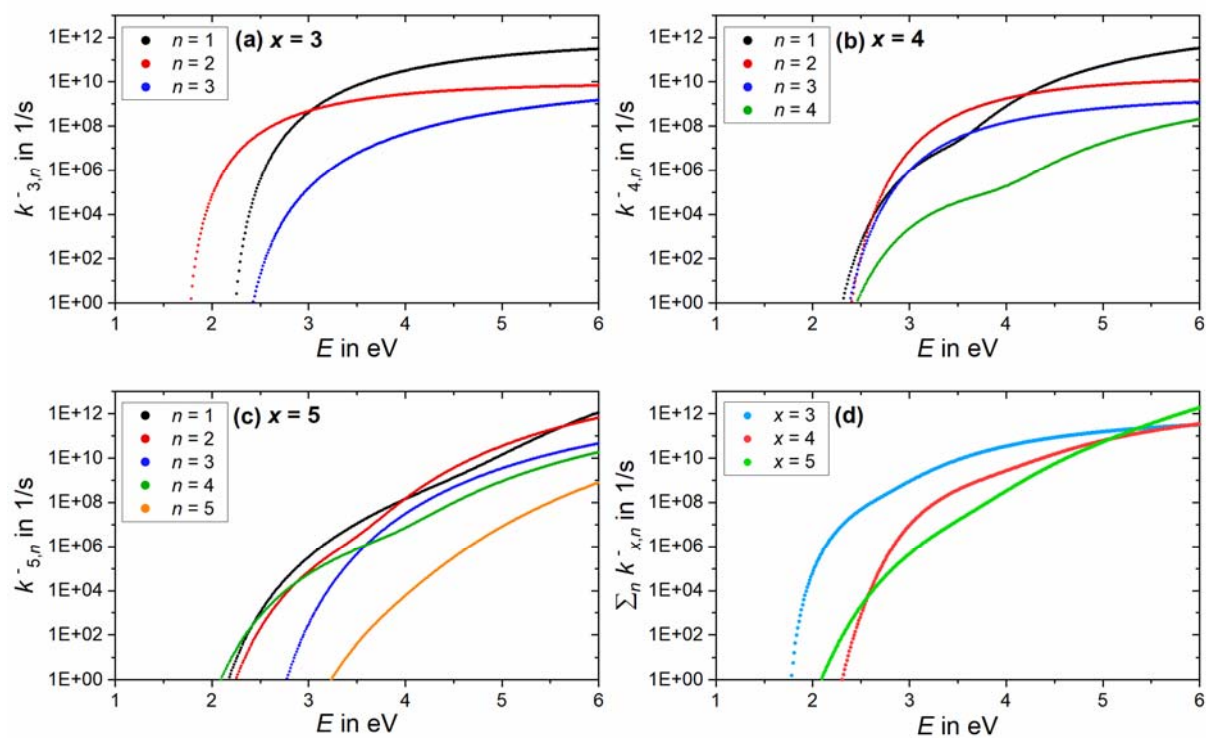

**Figure S19:** Method: CCSD/TZ//B3LYP-D3. (a)–(c) Calculated RRKM rate constants  $k_{x,n}^-$  for the loss channels (3) of the precursor ions  $(\text{NaCl})_x\text{Cl}^-$  with  $x = 3$ –5. (d) Total fragmentation rate constants  $\sum_n k_{x,n}^-$  as sum of all loss channels  $n$  for cluster sizes  $x = 3$ –5.

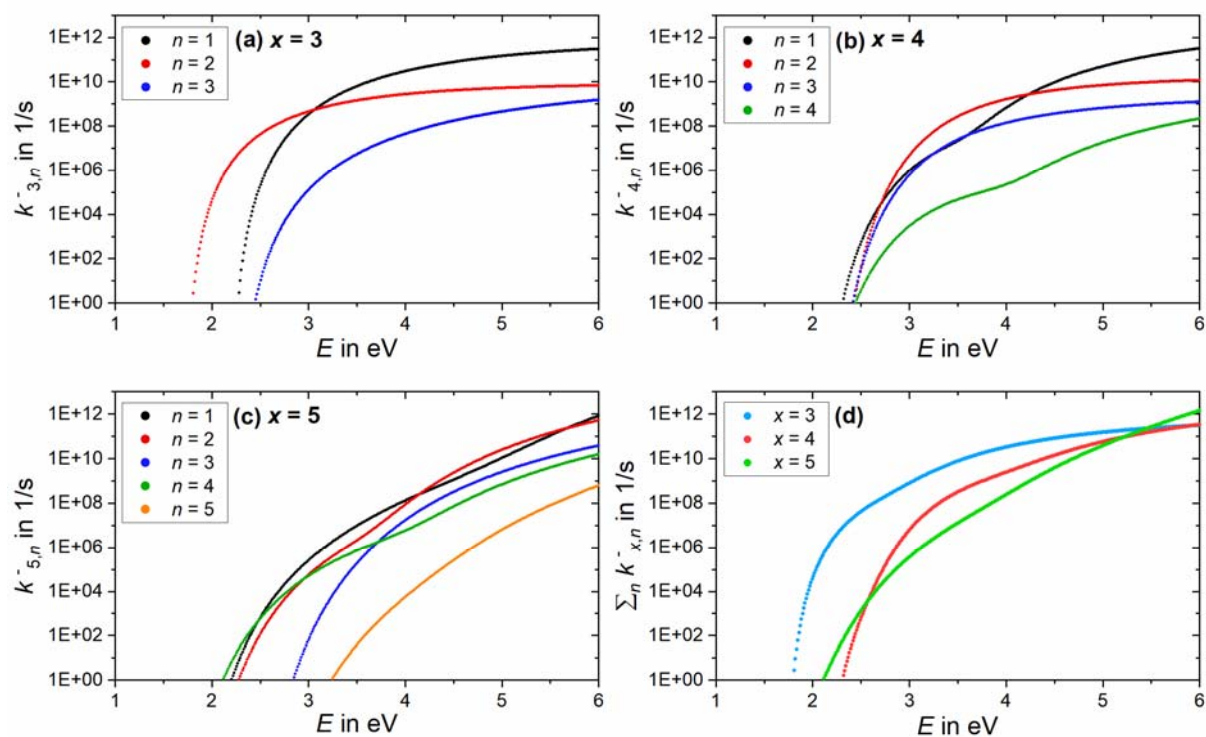

**Figure S20:** Method: CCSD(T)/TZ//B3LYP-D3. (a)–(c) Calculated RRKM rate constants  $k_{x,n}^-$  for the loss channels (3) of the precursor ions  $(\text{NaCl})_x\text{Cl}^-$  with  $x = 3$ –5. (d) Total fragmentation rate constants  $\sum_n k_{x,n}^-$  as sum of all loss channels  $n$  for cluster sizes  $x = 3$ –5.

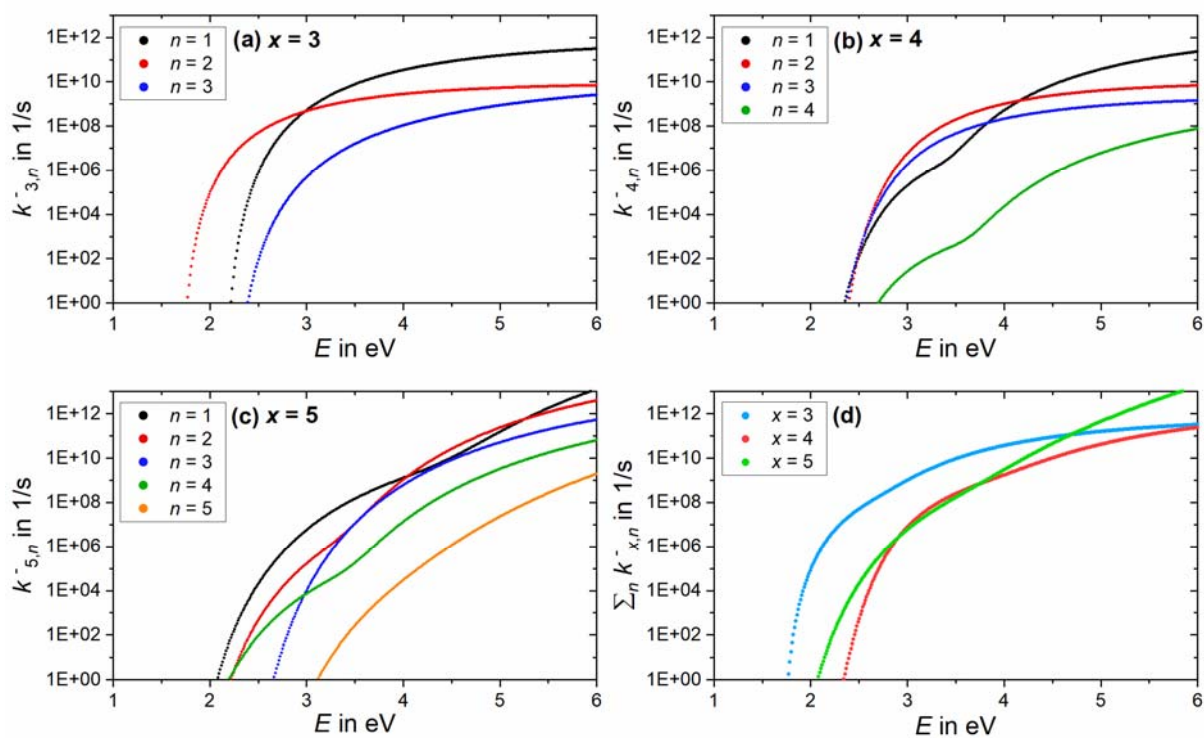

**Figure S21:** Method: CCSD/TZ// $\omega$ B97XD. (a)–(c) Calculated RRKM rate constants  $k_{x,n}^-$  for the loss channels (3) of the precursor ions  $(\text{NaCl})_x\text{Cl}^-$  with  $x = 3$ –5. (d) Total fragmentation rate constants  $\sum_n k_{x,n}^-$  as sum of all loss channels  $n$  for cluster sizes  $x = 3$ –5.

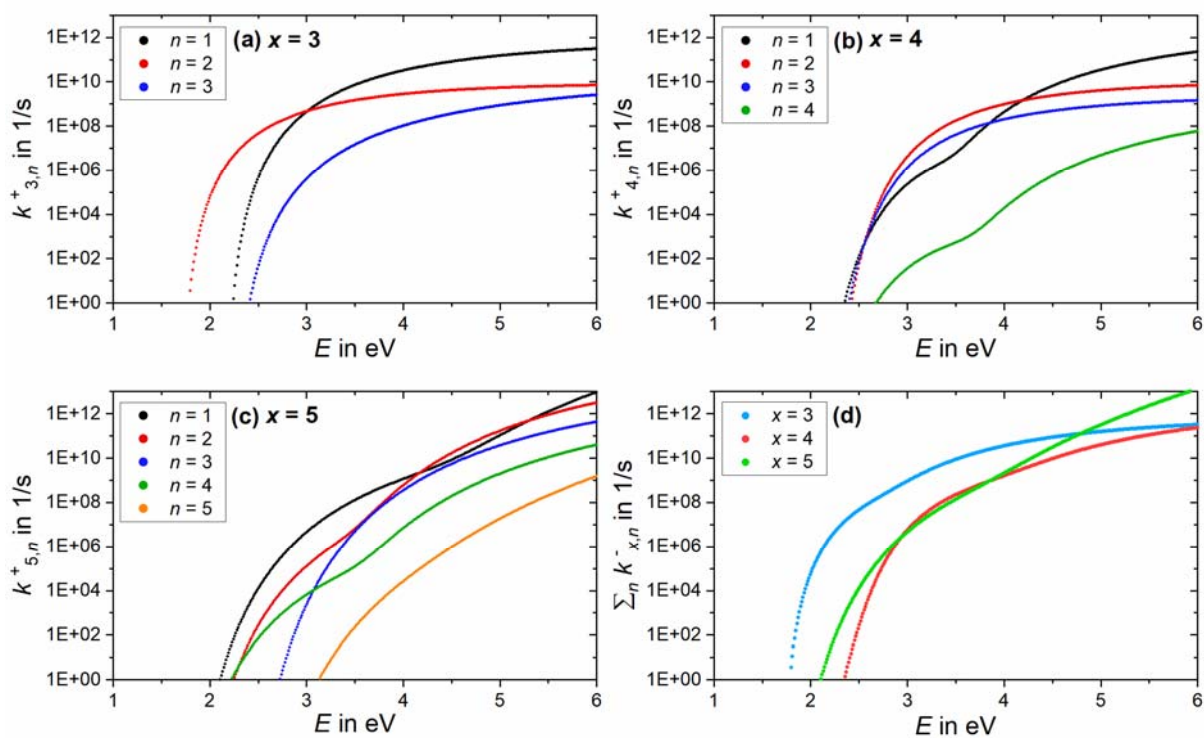

**Figure S22:** Method: CCSD(T)/TZ// $\omega$ B97XD. (a)–(c) Calculated RRKM rate constants  $k_{x,n}^-$  for the loss channels (3) of the precursor ions  $(\text{NaCl})_x\text{Cl}^-$  with  $x = 3$ –5. (d) Total fragmentation rate constants  $\sum_n k_{x,n}^-$  as sum of all loss channels  $n$  for cluster sizes  $x = 3$ –5.

## 5. Mass Spectra

Figures S23 and S24 show mass spectra of the sodium chloride cluster cations and anions without any isolation. These mass spectra demonstrate, that only the pure sodium chloride cluster ions without contamination (e.g., water) are observed in the mass spectra. Figures S25–S30 show mass spectra of specific cluster sizes for a SORI Power of 1 %, representing the mass spectra used to obtain the SORI CID breakdown curves in Figures 4 and 5.

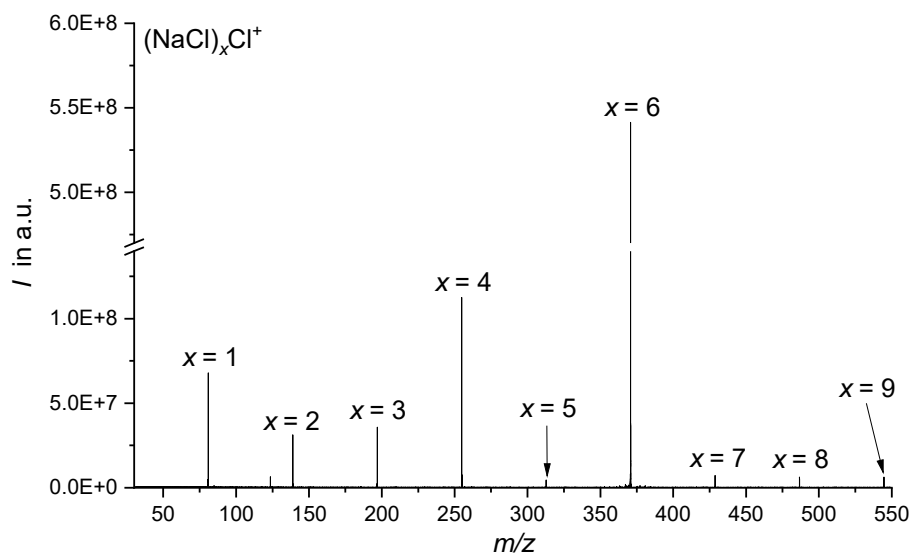

**Figure S23:** Mass spectrum of the sodium chloride cluster cations. The peak at  $m/z \approx 123.6$  is the third harmonic of the  $x = 6$  peak. Only the pure sodium chloride cluster cations without contamination (e.g., water) are observed in the mass spectra. The intensity distribution of the peaks depends significantly on the settings of the FT-ICR MS and does not represent the inherent stability of specific cluster sizes.

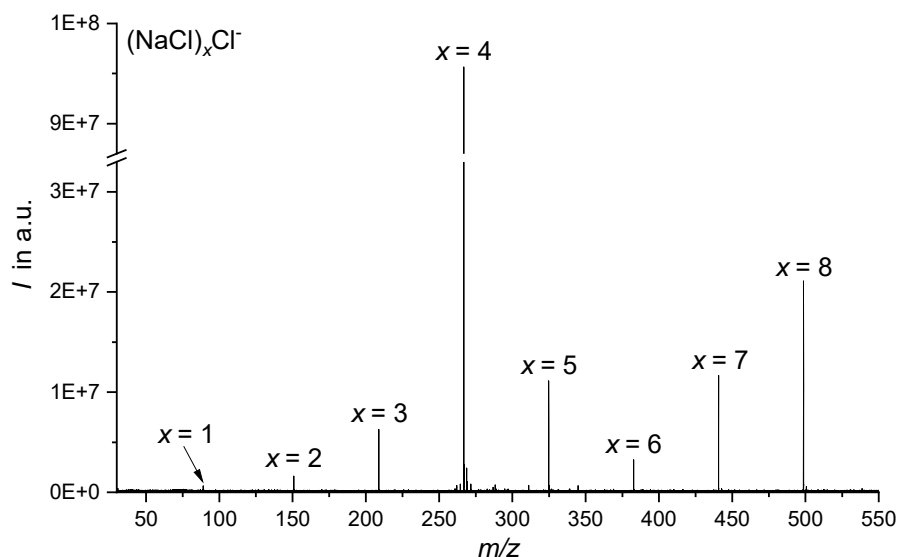

**Figure S24:** Mass spectrum of the sodium chloride cluster anions. Only the pure sodium chloride cluster anions without contamination (e.g. water) are observed in the mass spectra. The intensity distribution of the peaks depends significantly on the settings of the FT-ICR MS and does not represent the inherent stability of specific cluster sizes.

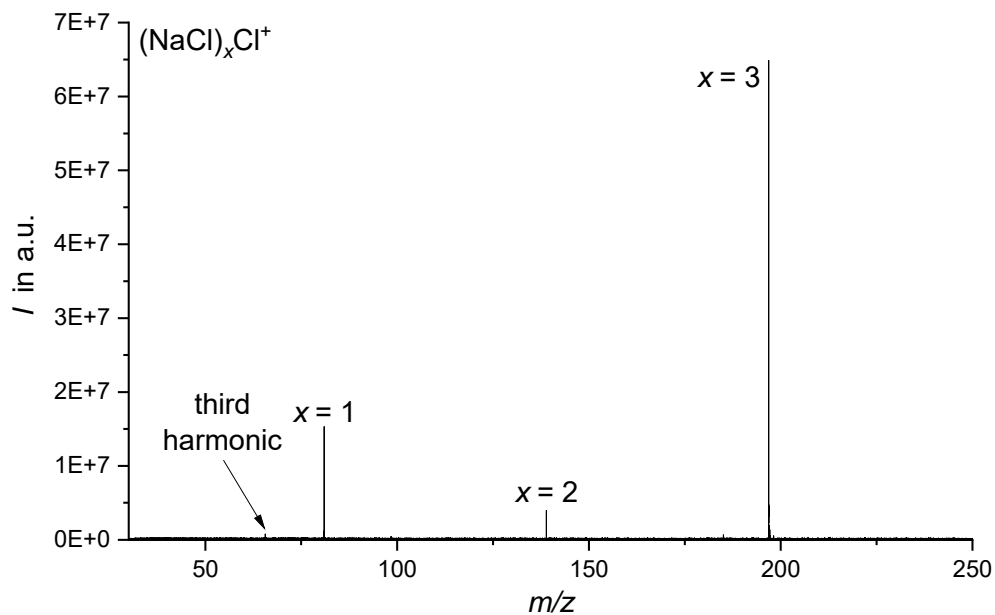

**Figure S25:** Mass spectrum of the cationic cluster size  $x = 3$  at 1 % SORI Power.

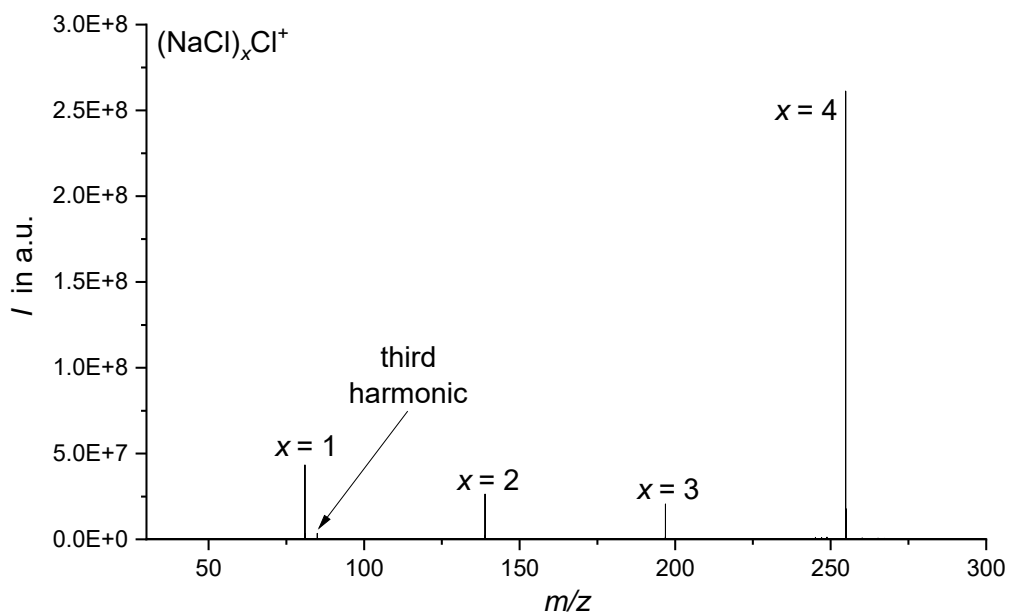

**Figure S26:** Mass spectrum of the cationic cluster size  $x = 4$  at 1 % SORI Power.

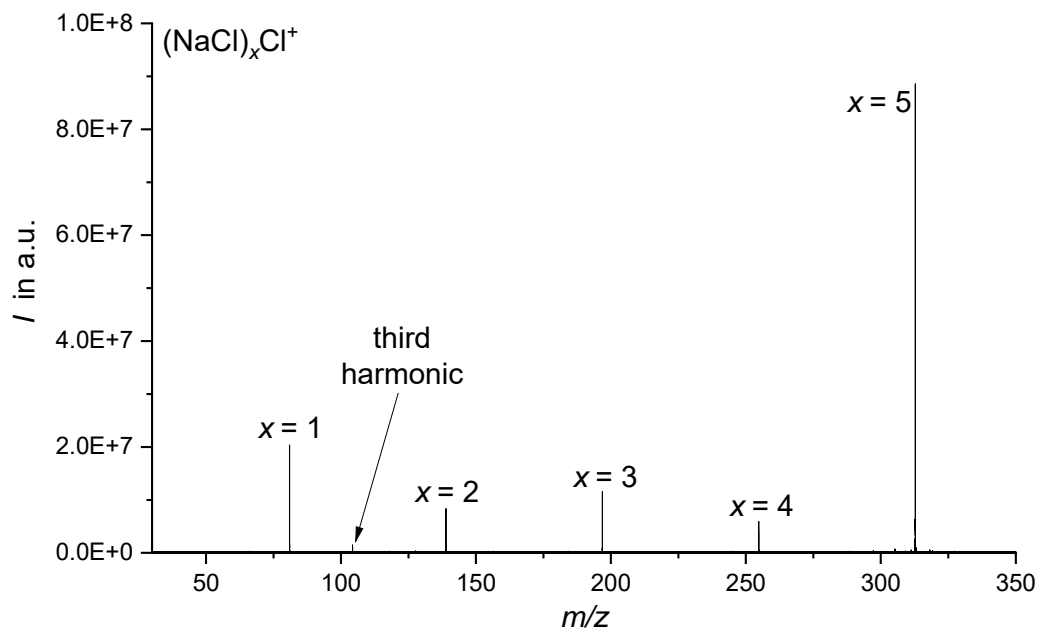

**Figure S27:** Mass spectrum of the cationic cluster size  $x = 5$  at 1 % SORI Power.

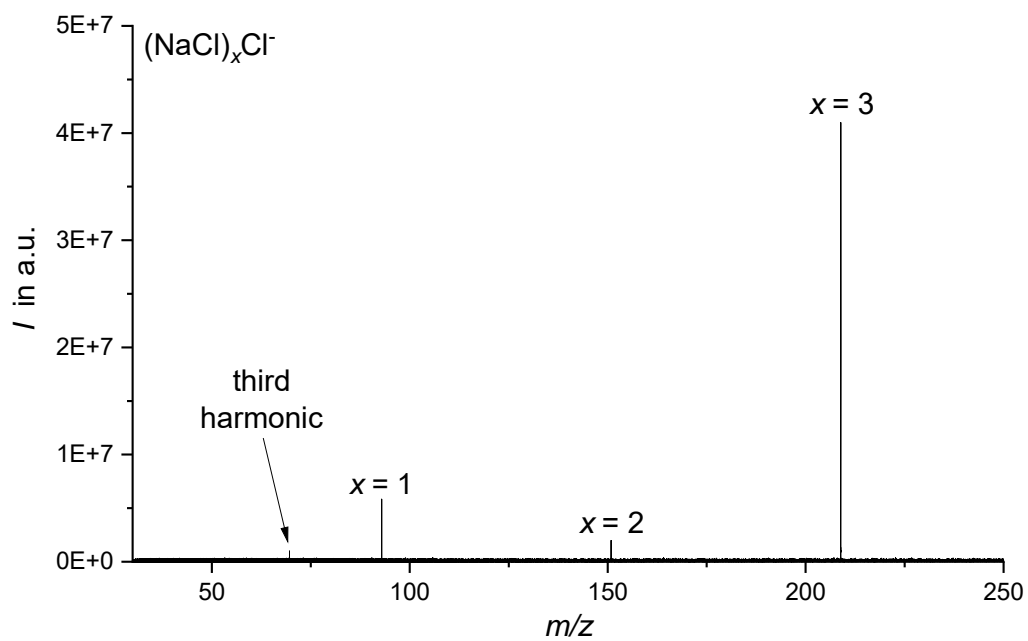

**Figure S28:** Mass spectrum of the anionic cluster size  $x = 3$  at 1 % SORI Power.

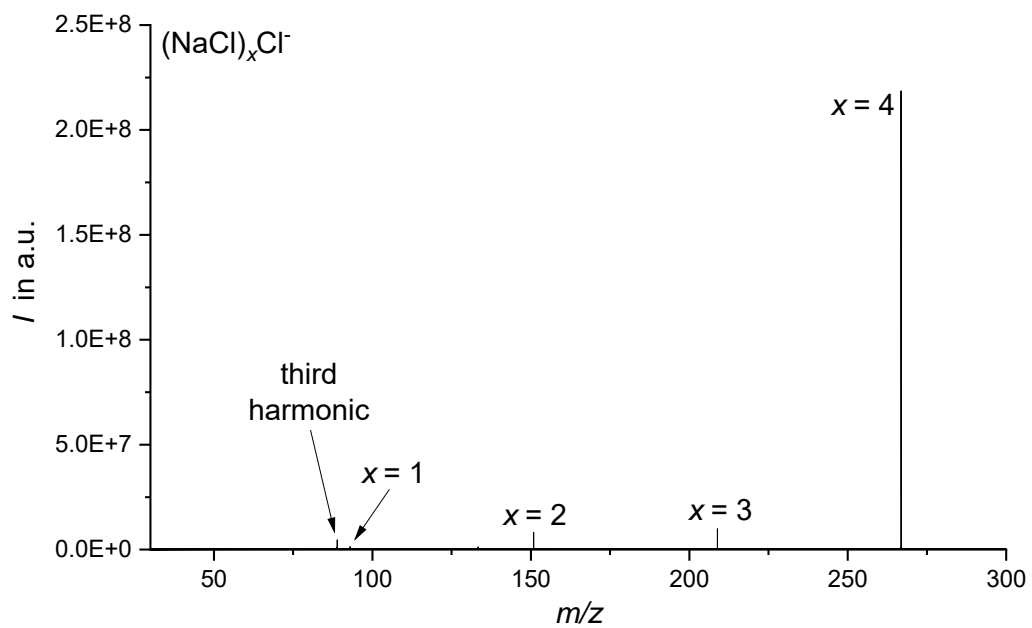

**Figure S29:** Mass spectrum of the anionic cluster size  $x = 4$  at 1 % SORI Power.

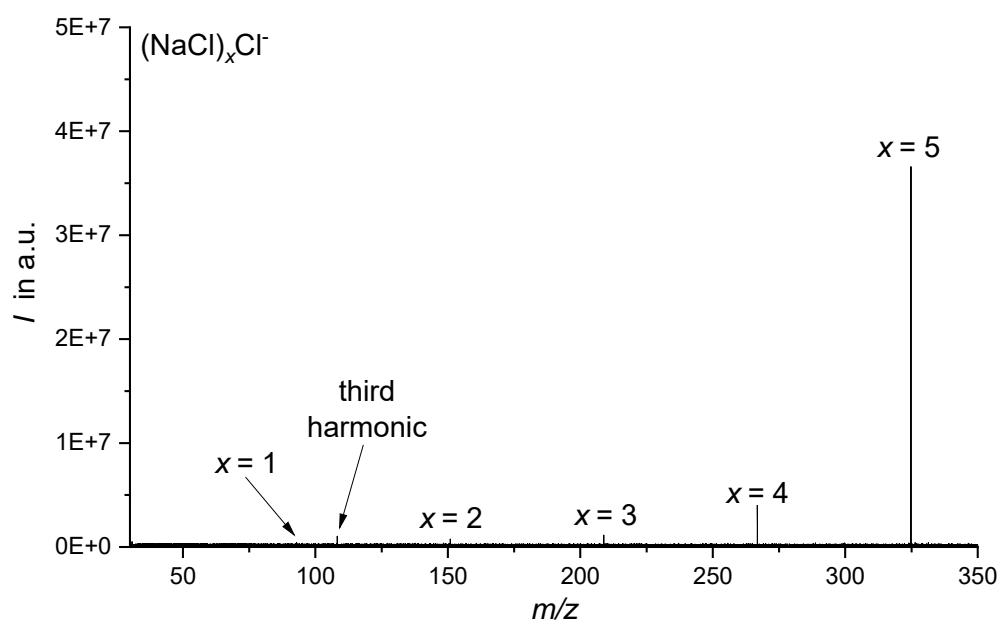

**Figure S30:** Mass spectrum of the anionic cluster size  $x = 5$  at 1 % SORI Power.

## 6. Quantum Chemical Calculations

In the following chapters 5.1-5.6, the structures of the cationic clusters (chapter 5.1: B3LYP-D3/aug-cc-pVDZ; chapter 5.2:  $\omega$ B97XD/aug-cc-pVDZ), the anionic clusters (chapter 5.3: B3LYP-D3/aug-cc-pVDZ; chapter 5.4:  $\omega$ B97XD/aug-cc-pVDZ) and the neutral clusters (chapter 5.5: B3LYP-D3/aug-cc-pVDZ; chapter 5.6:  $\omega$ B97XD/aug-cc-pVDZ) are listed.

### 6.1 Structures Cationic Clusters: B3LYP-D3/aug-cc-pVDZ

|                                  |                                  |                                  |
|----------------------------------|----------------------------------|----------------------------------|
| C1a                              | Na 0.000000 0.000000 0.273525    | Cl 0.000000 0.000000 0.331537    |
| Na 0.000000 -0.000000 2.493268   | Na -2.504504 -2.571625 -0.134536 | Na 0.000000 0.000000 2.916339    |
| Cl 0.000000 0.000000 0.000000    | Cl -0.000000 -2.772899 0.505198  | Cl 0.000000 0.000000 5.455030    |
| Na 0.000000 0.000000 -2.493268   | Na 2.504504 -2.571625 -0.134536  | Na 0.000000 0.000000 7.926314    |
| Cl 2.693266 -0.000000 -0.419586  | Na 2.504504 2.571625 -0.134536   |                                  |
| C2a                              | C4b                              | C4i                              |
| Cl 0.000000 0.000000 1.747963    | Na -0.427501 0.747500 1.811302   | Cl 7.319231 0.199687 0.000000    |
| Na -0.000000 2.036912 -0.000000  | Cl -0.427501 -1.856514 1.894294  | Na 4.765452 0.492299 0.000000    |
| Na -1.764017 -1.018456 -0.000000 | Na -1.956013 -2.784312 -0.000000 | Cl 2.311966 1.027021 0.000000    |
| Na 1.764017 -1.018456 -0.000000  | Cl -0.427501 -1.856514 -1.894294 | Na -0.000000 -0.009801 -0.000000 |
| Cl 0.000000 0.000000 -1.747963   | Na -0.427501 0.747500 -1.811302  | Cl -2.313993 -1.040780 -0.000000 |
|                                  | Cl -1.167425 2.595860 0.000000   | Na -4.764626 -0.492975 -0.000000 |
| C2b                              | Na 1.554331 -1.779157 -0.000000  | Na 9.551378 1.214821 0.000000    |
| Cl -0.000000 -2.552744 -0.000117 | Na 1.330772 3.437509 0.000000    | Cl -7.316506 -0.190605 -0.000000 |
| Na -0.000000 0.000000 0.001367   | Cl 1.974490 0.878378 -0.000000   | Na -9.553283 -1.197116 -0.000000 |
| Cl 0.000000 2.552744 -0.000117   |                                  |                                  |
| Na -0.859986 4.859979 -0.000503  |                                  |                                  |
| Na 0.859986 -4.859979 -0.000503  |                                  |                                  |
|                                  | C4c                              | C5a                              |
|                                  | Cl -0.682809 1.889685 -1.667630  | Na -2.118988 -0.754066 0.000000  |
|                                  | Na -0.000000 3.458145 0.243044   | Cl -0.644266 0.256020 2.053868   |
|                                  | Cl 1.540640 1.655316 1.393180    | Na 0.635348 -2.357166 1.796154   |
|                                  | Na -0.000000 -0.000000 2.635742  | Cl 2.416282 -1.520286 -0.000000  |
|                                  | Cl -1.540640 -1.655316 1.393180  | Na 1.404071 0.876555 -0.000000   |
|                                  | Na -0.000000 -3.458145 0.243044  | Cl -0.644266 0.256020 -2.053868  |
|                                  | Na -1.630167 -0.506011 -1.136765 | Na -0.644266 2.845682 -2.251560  |
|                                  | Na 1.630167 0.506011 -1.136765   | Cl 0.497497 3.467653 0.000000    |
|                                  | Cl 0.682809 -1.889685 -1.667630  | Na -0.644266 2.845682 2.251560   |
|                                  |                                  | Na 0.635348 -2.357166 -1.796154  |
|                                  |                                  | Cl -1.151113 -3.170861 -0.000000 |
|                                  | C4d                              | C5b                              |
|                                  | Na 0.000000 2.223010 0.101213    | Cl -0.000000 2.242614 0.000000   |
|                                  | Cl 2.001024 1.155292 -1.202695   | Na -1.736104 1.002340 1.802050   |
|                                  | Na 1.925183 -1.111505 0.101213   | Na 1.736104 1.002340 1.802050    |
|                                  | Cl -0.000000 -2.310584 -1.202695 | Na -1.736104 1.002340 -1.802050  |
|                                  | Na -1.925183 -1.111505 0.101213  | Na 1.736104 1.002340 -1.802050   |
|                                  | Cl -2.001024 1.155292 -1.202695  | Cl 0.000000 0.000000 3.463214    |
|                                  | Na 0.000000 0.000000 -2.657164   | Na -0.000000 -2.004680 1.802050  |
|                                  | Cl 0.000000 0.000000 2.134512    | Cl 0.000000 -0.000000 -3.463214  |
|                                  | Na 0.000000 0.000000 4.630863    | Na -0.000000 -2.004680 -1.802050 |
|                                  |                                  | Cl -1.942160 -1.121307 0.000000  |
|                                  | C4g                              | C5c                              |
|                                  | Na 0.000000 1.738880 4.658142    | Na 2.159206 -0.000000 0.172085   |
|                                  | Cl 0.000000 0.000000 2.561760    | Cl 1.941215 2.566541 -0.394166   |
|                                  | Na 0.000000 0.000000 0.000000    | Na 0.000000 3.213383 -1.985329   |
|                                  | Cl 0.000000 0.000000 -2.561760   | Cl -1.941215 2.566541 -0.394166  |
|                                  | Na 1.738880 -0.000000 -4.658142  | Na -2.159206 0.000000 0.172085   |
|                                  | Cl 0.000000 0.000000 6.475113    | Cl -1.941215 -2.566541 -0.394166 |
|                                  | Na -0.000000 -1.738880 4.658142  | Na 0.000000 -2.649420 1.509858   |
|                                  | Cl 0.000000 0.000000 -6.475113   | Cl 0.000000 0.000000 1.969281    |
|                                  | Na -1.738880 0.000000 -4.658142  | Na 0.000000 2.649420 1.509858    |
|                                  |                                  | Cl 1.941215 -2.566541 -0.394166  |
|                                  | C4h                              | Na -0.000000 -3.213383 -1.985329 |
|                                  | Na 0.000000 0.000000 -5.051596   |                                  |
|                                  | Cl 0.000000 2.260235 -3.867923   |                                  |
|                                  | Na 0.000000 2.032623 -1.389267   |                                  |
|                                  | Cl -0.000000 -2.260235 -3.867923 |                                  |
|                                  | Na -0.000000 -2.032623 -1.389267 |                                  |
|                                  |                                  | C5d                              |
|                                  |                                  | Cl 3.400379 -0.647211 0.167764   |
| C4a                              |                                  |                                  |
| Cl 0.000000 2.772899 0.505198    |                                  |                                  |
| Na -2.504504 2.571625 -0.134536  |                                  |                                  |
| Cl -2.693266 0.000000 -0.419586  |                                  |                                  |



Na 2.004261 0.989947 1.658618  
Cl 0.661138 1.926527 -0.824117  
Na -1.472104 1.954793 1.068308  
Cl -0.283491 -0.249984 2.194629  
Na 1.136079 -2.016421 0.431007  
Na 2.834008 0.829341 -1.879449  
Cl -3.323860 0.806240 -0.299371  
Na -2.564748 -1.512655 0.701508  
Cl -0.835077 -2.188513 -1.240374  
Na -1.348816 0.300448 -1.977722

#### C5e

Na 1.765593 1.100894 3.240741  
Cl 0.000000 1.995221 -2.694528  
Na -0.000000 -0.000000 -4.324788  
Cl -1.939762 -1.417825 0.675263  
Na -1.765593 -1.100894 3.240741  
Cl -0.000000 -1.995221 -2.694528  
Na 1.766464 3.159784 -1.232130  
Cl 0.000000 0.000000 4.649202  
Na -1.766464 -3.159784 -1.232130  
Cl 1.939762 1.417825 0.675263  
Na -0.000000 -0.000000 -0.636199

#### C5f

Na -0.540566 3.547501 0.615858  
Cl -2.650037 2.065772 0.590984  
Na -4.377886 0.485662 -0.528206  
Cl 1.269390 1.783134 -0.006824  
Cl -2.864190 -1.513904 -1.154128  
Na -1.597207 -3.503193 -0.069481  
Cl 0.259363 -2.192360 1.164032  
Na 2.741828 -1.437021 0.953074  
Na -0.846387 0.006952 0.052151  
Cl 4.632710 -0.591665 -0.493842  
Na 3.619945 1.594042 -1.178283

#### C5g

Na 0.000000 0.000000 -4.150138  
Cl 2.005490 1.157870 -2.723446  
Na 0.000000 2.164754 -1.354174  
Cl -2.005490 1.157870 -2.723446  
Na -1.874732 -1.082377 -1.354174  
Cl 0.000000 0.000000 0.553769  
Na 0.000000 0.000000 3.112315  
Cl 0.000000 0.000000 5.658445  
Na 0.000000 0.000000 8.126536  
Na 1.874732 -1.082377 -1.354174  
Cl -0.000000 -2.315740 -2.723446

#### C5h

Na -0.000000 4.214824 -1.061411  
Cl 0.000000 -1.929626 -2.317052  
Na -0.000000 -4.214824 -1.061411  
Cl 0.000000 -4.495034 1.434303  
Na -0.000000 -0.000000 -0.430141  
Cl 0.000000 1.929626 -2.317052  
Na 0.000000 -2.505729 2.961623  
Cl 0.000000 0.000000 2.213803  
Na 0.000000 2.505729 2.961623  
Cl 0.000000 4.495034 1.434303  
Na -0.000000 -0.000000 -4.063117

#### C5i

Na 0.773944 3.464432 -0.226102  
Cl -0.776473 1.774045 0.904638  
Cl 2.922834 2.064301 -0.589438  
Na 4.790260 0.297772 -0.423949  
Cl 3.555759 -1.717035 0.601430  
Na 1.775366 -3.405121 -0.234298  
Cl -0.322640 -1.945944 -0.312360  
Na 1.310184 0.035728 0.602901

Na -2.329904 -0.176396 -0.085585  
Cl -4.870780 -0.206809 -0.610273  
Na -7.106024 -0.167822 0.376308

#### C5j

Na -4.153356 0.665113 -0.015216  
Cl -6.376377 -0.590415 0.068436  
Na -4.996416 -2.698079 0.027894  
Cl -2.537825 -1.803230 -0.058337  
Na -0.560812 -0.162791 -0.063834  
Cl -1.930429 2.177562 -0.047796  
Na 0.337636 3.318663 0.039449  
Cl 1.844627 1.146811 0.012370  
Na 4.249256 0.254089 0.020875  
Cl 6.644355 -0.610959 0.017278  
Na 8.764241 -1.871184 0.003271

#### C5k

Na -2.699772 -2.140847 -0.000000  
Cl -2.783428 -4.685877 -0.000000  
Na -5.295888 -4.410616 -0.000000  
Cl -5.530980 -1.776378 -0.000000  
Na -4.925851 0.700942 -0.000000  
Cl -2.308154 0.537994 -0.000000  
Na 0.000000 1.696747 0.000000  
Cl 2.285093 2.735316 0.000000  
Na 4.793097 2.457754 0.000000  
Cl 7.350319 2.268138 0.000000  
Na 9.654011 3.119085 0.000000

#### C5l

Na 2.056003 -6.796260 0.000000  
Cl 3.930853 -5.067903 0.000000  
Na 3.063645 -2.729902 0.000000  
Cl -0.444018 -6.289420 0.000000  
Na -0.859676 -3.830347 0.000000  
Cl 0.641932 -1.648971 0.000000  
Na -0.000000 0.867747 -0.000000  
Cl -0.429640 3.333482 -0.000000  
Na -1.773619 5.475249 -0.000000  
Cl -3.092937 7.671263 -0.000000  
Na -3.423192 10.106819 -0.000000

#### C6a

Na 2.483365 1.433771 1.396197  
Cl 0.000000 2.489056 1.387921  
Na -2.483365 1.433771 1.396197  
Cl -2.155586 1.244528 -1.387921  
Na 0.000000 2.867543 -1.396197  
Cl 2.155586 1.244528 -1.387921  
Na 2.483365 -1.433771 -1.396197  
Cl 2.155586 -1.244528 1.387921  
Na -0.000000 -2.867543 1.396197  
Cl -0.000000 -2.489056 -1.387921  
Na 0.000000 0.000000 0.000000  
Cl -2.155586 -1.244528 1.387921  
Na -2.483365 -1.433771 -1.396197

#### C6b

Na 0.000000 0.000000 2.707642  
Cl 2.033193 1.173864 1.472455  
Na 2.092183 1.207922 -1.507070  
Cl -0.000000 2.771113 -1.678898  
Na -2.092183 1.207922 -1.507070  
Cl -2.399854 -1.385556 -1.678898  
Na -0.000000 -2.415845 -1.507070  
Cl -0.000000 -2.347729 1.472455  
Na -0.000000 2.977109 0.923571  
Cl -2.033193 1.173864 1.472455  
Na -2.578252 -1.488554 0.923571  
Cl 2.399854 -1.385556 -1.678898  
Na 2.578252 -1.488554 0.923571

#### C6c

Na 2.120491 1.815451 0.324573  
Cl 0.000000 3.220740 -0.320350  
Na -2.120491 1.815451 0.324573  
Na 0.000000 1.776975 -2.506751  
Cl 1.966167 -0.000000 -1.845121  
Cl -1.966167 0.000000 -1.845121  
Cl 2.243404 -0.000000 2.234660  
Na -0.000000 -1.776975 -2.506751  
Cl -0.000000 -3.220740 -0.320350  
Na -2.120491 -1.815451 0.324573  
Na 2.120491 -1.815451 0.324573  
Cl -2.243404 0.000000 2.234660  
Na -0.000000 0.000000 3.501351

#### C6d

Na 1.867877 2.572302 0.284364  
Cl 0.000000 2.633950 2.091952  
Na 0.000000 0.000000 2.122477  
Cl -2.666739 0.000000 0.198638  
Na -1.661905 0.000000 -2.224710  
Cl 0.000000 2.098420 -1.905756  
Na 1.661905 -0.000000 -2.224710  
Cl -0.000000 -2.098420 -1.905756  
Na -1.867877 -2.572302 0.284364  
Cl -0.000000 -2.633950 2.091952  
Na 1.867877 -2.572302 0.284364  
Na -1.867877 2.572302 0.284364  
Cl 2.666739 -0.000000 0.198638

#### C6e

Na -2.783201 -0.885009 -1.259199  
Cl -2.648719 1.714292 -1.213374  
Na -2.350673 1.628385 1.378742  
Cl 0.295588 2.034992 1.745924  
Na 2.605131 2.695497 0.717407  
Cl 2.571974 1.389897 -1.494627  
Na 2.466209 -1.234622 -1.258706  
Cl 2.028937 -2.255128 1.152539  
Na -0.311667 -3.061591 0.264847  
Cl -0.251452 -1.571545 -1.982484  
Na -0.081934 1.241535 -1.607254  
Cl -2.015743 -1.223679 1.419706  
Na 0.486140 -0.521474 2.339561

#### C6f

Cl -0.583426 0.257265 1.940655  
Na -0.583426 3.176073 1.781431  
Cl -2.560890 3.214714 0.000000  
Na -0.583426 3.176073 -1.781431  
Cl -0.583426 0.257265 -1.940655  
Na 1.620725 0.700831 0.000000  
Cl 1.388401 3.292474 0.000000  
Na 0.090763 -2.246829 1.797790  
Cl 2.380267 -1.915524 0.000000  
Na 2.272125 -4.561370 0.000000  
Cl -0.339298 -4.212123 0.000000  
Na 0.090763 -2.246829 -1.797790  
Na -2.446405 0.620307 0.000000

#### C6g

Na 0.136118 0.998609 2.248565  
Cl 0.136118 -1.617069 2.387575  
Na -0.229759 -4.166106 2.309091  
Cl -1.369440 -4.432726 0.000000  
Na -1.252814 -1.621860 0.000000  
Cl -1.473370 1.140656 -0.000000  
Na -0.745786 3.729634 -0.000000  
Cl 1.096309 3.445339 1.968167  
Na 2.769998 3.663947 -0.000000  
Cl 1.096309 3.445339 -1.968167

Na 0.136118 0.998609 -2.248565  
Cl 0.136118 -1.617069 -2.387575  
Na -0.229759 -4.166106 -2.309091

C6h

Na 1.678338 2.078510 1.423763  
Cl 3.707758 1.589489 -0.106763  
Na 1.801457 0.588746 -1.708781  
Cl -0.267062 2.086369 -0.572157  
Na -2.712926 2.853029 -1.025126  
Cl -3.995151 1.054632 0.296433  
Na -4.493749 -1.409992 -0.382088  
Cl -2.154568 -2.412908 0.011507  
Na 0.430298 -2.804392 0.091919  
Cl 1.050006 -0.558949 1.832631  
Na -1.487493 0.009831 0.989237  
Na 3.693469 -0.939381 0.594197  
Cl 2.364703 -2.002153 -1.450727

C6i

Na 2.418892 -1.288059 1.752061  
Cl -0.326612 -1.322407 2.122567  
Na -0.226389 -3.001009 0.000000  
Cl -0.326612 -1.322407 -2.122567  
Na -0.087787 1.165343 -0.000000  
Cl -1.647514 2.525705 1.968244  
Na -1.647514 0.436222 -3.448295  
Cl -1.647514 2.525705 -1.968244  
Na -1.647514 0.436222 3.448295  
Cl 2.385327 -3.285427 0.000000  
Na -2.692865 3.816464 -0.000000  
Cl 2.510402 0.699514 0.000000  
Na 2.418892 -1.288059 -1.752061

C6j

Na 4.161857 1.295272 -1.310646  
Cl 2.465997 2.247894 0.395723  
Na 3.018021 0.053809 1.876922  
Cl 4.123684 -1.118137 -0.337436  
Cl -0.614572 -1.200389 -1.698788  
Na 0.010176 1.349645 0.004037  
Cl -2.433845 2.232761 -0.469211  
Na -3.007255 -0.003882 -1.878149  
Na -4.153200 1.364128 1.259541  
Cl -4.138661 -1.081412 0.374410  
Na -1.728100 -2.007530 0.769883  
Na 1.709618 -2.041653 -0.709875  
Cl 0.590203 -1.087052 1.727724

C6k

Na 0.890364 -3.488119 2.178466  
Cl -0.274611 -4.283765 -0.000000  
Na 0.890364 -3.488119 -2.178466  
Cl 0.386635 -0.964218 2.055877  
Na -1.156608 1.331472 2.350084  
Cl 0.890364 2.884693 1.959481  
Na 0.631961 4.518776 0.000000  
Cl 0.890364 2.884693 -1.959481  
Na -1.156608 1.331472 -2.350084  
Cl 0.386635 -0.964218 -2.055877  
Na 1.308022 0.937985 0.000000  
Cl -2.308136 0.807177 0.000000  
Na -1.363067 -1.706568 -0.000000

C6l

Na 3.084191 -1.501853 0.541028  
Cl 3.911710 0.945268 0.221220  
Na 2.275337 0.823476 -1.877969  
Cl 0.328791 2.295645 -0.541924  
Na -2.004602 3.472318 -0.537454  
Cl -3.410544 1.528307 0.357287  
Na -4.615184 -0.762139 0.137978

Cl -2.597315 -2.277890 -0.343975  
Na -0.172357 -3.108787 -0.001200  
Cl 0.759910 -1.011473 1.914981  
Na -1.075935 -0.053629 0.049808  
Na 1.804125 1.522515 1.685070  
Cl 1.463252 -1.733441 -1.605816

C6m

Cl 0.347612 1.517817 -1.355252  
Na -2.170413 -0.431800 1.819453  
Cl 0.441456 -0.430134 2.030080  
Na 3.030372 -1.334329 1.269332  
Cl 2.446338 -1.994501 -1.250572  
Na -0.059491 -1.377848 -0.858802  
Cl -3.782696 1.378487 0.438930  
Na -2.045423 2.415496 -1.161963  
Na 1.460279 1.850520 1.130825  
Cl 3.904162 1.132941 0.642202  
Na 3.199820 0.461636 -1.813985  
Na -4.677673 -0.798033 -0.761827  
Cl -2.539941 -2.112968 -0.261468

C6n

Na -0.104500 -2.948086 1.768679  
Cl -2.092026 -3.011197 0.000000  
Cl 1.905064 -2.920977 0.000000  
Na 1.610954 -0.302749 0.000000  
Cl -0.104500 -0.214496 -2.137027  
Na -2.292635 -0.383742 0.000000  
Na -0.104500 -2.948086 -1.768679  
Cl -0.104500 -0.214496 2.137027  
Na -0.594277 2.330999 1.897483  
Cl 1.653664 2.709415 0.000000  
Na 3.823242 3.941108 0.000000  
Cl -2.386176 2.344406 0.000000  
Na -0.594277 2.330999 -1.897483

C6o

Cl 3.972862 -0.950543 -0.987082  
Na 2.539031 -2.265479 0.823921  
Na 1.746518 -0.252972 -2.153719  
Na 3.646763 1.130766 0.641022  
Cl 2.210522 -0.183255 2.459963  
Na -0.029927 0.405210 1.265099  
Cl 0.062572 -1.707104 -0.592549  
Na -2.541714 -1.770472 -0.847209  
Cl -2.368515 1.505503 0.419200  
Na -0.944995 3.190559 -0.962664  
Cl 1.390560 2.110499 -0.852431  
Na -4.874722 0.727743 0.874560  
Cl -4.970970 -1.529153 -0.214812

C6p

Na 1.415231 -2.538532 1.734948  
Cl 2.693547 -0.742969 0.000000  
Cl -0.652796 -0.697070 1.930733  
Cl 0.383999 -4.180316 0.000000  
Na -1.592762 -2.475681 0.000000  
Na 1.415231 -2.538532 -1.734948  
Cl -0.652796 -0.697070 -1.930733  
Na -1.855922 1.079220 0.000000  
Cl 0.790020 2.910484 0.000000  
Na 1.415231 1.029344 1.720153  
Na 1.415231 1.029344 -1.720153  
Na -1.207100 4.713819 0.000000  
Cl -3.212358 3.213482 0.000000

C6q

Na 0.766557 0.134341 1.783697  
Cl 0.766557 -2.458713 1.938708  
Cl 2.140489 1.552038 0.000000  
Na 0.766557 0.134341 -1.783697

Cl 0.766557 -2.458713 -1.938708  
Na -1.008483 -2.596155 0.000000  
Na 2.651122 -2.982741 0.000000  
Cl -1.492807 0.166452 0.000000  
Na -3.352654 1.918228 0.000000  
Cl -5.230116 3.639481 0.000000  
Na -7.333804 4.928165 0.000000  
Na 4.586025 0.625469 0.000000  
Cl 4.941762 -1.839259 0.000000

C6r

Na -0.393238 3.493055 -0.246006  
Cl -1.732205 1.652981 0.940970  
Cl 1.618924 2.151545 -1.147461  
Na 4.021845 1.237692 -0.768233  
Cl 2.534838 -1.709278 0.161827  
Na 0.765612 -3.320994 -0.880009  
Cl -1.321884 -1.864516 -0.841015  
Na -3.331648 -0.260412 -0.047532  
Cl -5.916226 -0.449430 -0.153149  
Na -8.012620 0.051454 0.996266  
Na 0.339351 0.072018 0.084957  
Na 4.838394 -1.647246 1.427531  
Cl 5.963340 0.460979 0.671962

C6s

Cl 0.846385 3.351224 -0.000000  
Na -0.591075 1.099940 -0.000000  
Cl -1.057996 -0.660068 1.928170  
Cl 1.840566 1.954762 4.333344  
Na 0.351785 -0.053117 3.992279  
Na 1.840566 3.557219 2.403699  
Na 1.840566 3.557219 -2.403699  
Cl 1.840566 1.954762 -4.333344  
Na 0.351785 -0.053117 -3.992279  
Cl -1.057996 -0.660068 -1.928170  
Na -1.404936 -2.508214 0.000000  
Cl -1.784422 -5.069656 0.000000  
Na -3.357853 -6.945951 0.000000

C6t

Na 11.272813 -3.345901 0.000000  
Cl 8.869680 -2.836952 0.000000  
Na 6.835416 -1.275770 0.000000  
Cl 4.907575 0.352219 0.000000  
Na 2.464484 0.933882 0.000000  
Cl 0.000000 1.692571 0.000000  
Na -1.525304 3.833897 0.000000  
Cl -3.788602 2.672440 0.000000  
Na -2.369504 0.348841 0.000000  
Cl -4.335396 -1.312886 0.000000  
Na -5.977424 1.120524 0.000000  
Cl -8.192232 -0.160172 0.000000  
Na -6.776609 -2.244812 0.000000

C6u

Na 8.057042 0.236806 -0.000718  
Cl 5.567018 0.569338 -0.006417  
Na 3.328255 -0.611688 -0.003422  
Cl 1.071730 -1.772054 -0.000563  
Na -1.411547 -1.468057 0.000031  
Cl -3.990767 -1.276317 0.001078  
Na -6.256895 -2.581812 0.000247  
Cl -7.906525 -0.637695 0.001015  
Na -5.515512 0.960348 0.001723  
Cl -6.741891 3.194096 0.000343  
Na -8.862682 1.821703 -0.000319  
Cl 10.624826 0.143665 0.005094  
Na 12.787282 1.301105 0.001607

C6v

Cl -2.287242 -3.190359 -0.000000

Na -1.013247 -0.922705 -0.000000  
Cl -0.000000 1.356352 -0.000000  
Na 1.998933 2.927860 0.000000  
Cl 4.018677 4.449261 0.000000  
Na 4.796534 6.840561 0.000000  
Cl 5.769027 9.218110 0.000000  
Na 7.655210 10.786906 0.000000  
Na -4.907912 -3.567420 -0.000000  
Cl -6.372943 -5.587985 -0.000000  
Na -5.022164 -7.750157 -0.000000  
Cl -2.479319 -7.945921 0.000000  
Na -1.418210 -5.686938 0.000000

#### C7a

Cl 0.000000 2.397813 1.103080  
Na 1.861243 1.074589 2.618182  
Na -1.861243 1.074589 2.618182  
Na 0.000000 0.000000 -0.291243  
Cl 0.000000 0.000000 4.173511  
Na -0.000000 -2.149178 2.618182  
Cl -2.076567 -1.198907 1.103080  
Na -2.522460 -1.456343 -1.494843  
Cl -1.894245 1.093643 -2.319934  
Na 0.000000 0.000000 -3.886966  
Cl 1.894245 1.093643 -2.319934  
Na 2.522460 -1.456343 -1.494843  
Cl 2.076567 -1.198907 1.103080  
Na 0.000000 2.912686 -1.494843  
Cl -0.000000 -2.187285 -2.319934

#### C7b

Na 0.000000 0.000000 -2.909685  
Cl 0.000000 2.654879 -2.853492  
Na -1.829773 -2.645265 -0.955006  
Cl -0.000000 0.000000 3.812849  
Na 0.000000 2.582232 3.624254  
Cl 2.115232 -0.000000 -0.646807  
Na 1.829773 2.645265 -0.955006  
Cl -0.000000 -3.048193 1.084167  
Na -0.000000 0.000000 1.056657  
Cl -0.000000 -2.654879 -2.853492  
Na -0.000000 -2.582232 3.624254  
Cl -2.115232 0.000000 -0.646807  
Na -1.829773 2.645265 -0.955006  
Cl 0.000000 3.048193 1.084167  
Na 1.829773 -2.645265 -0.955006

#### C7c

Na -2.220272 -2.010759 -1.797734  
Cl -3.589207 -1.461203 0.424789  
Na -1.371975 -2.081135 1.667095  
Na -3.218864 1.083129 0.019521  
Cl 0.832248 -0.685808 2.242953  
Na 0.369331 1.901662 1.988884  
Cl -1.784496 3.041697 0.972607  
Na -0.483155 3.121170 -1.347781  
Cl 1.871060 2.389305 -0.255830  
Na 1.024560 -0.369805 -1.128172  
Na 2.296039 -2.587798 0.891553  
Cl -1.337567 0.614097 -2.076814  
Cl -0.006645 -2.942818 -0.564621  
Cl 3.625840 -1.149424 -0.825567  
Na 4.205159 1.243590 -0.165891

#### C7d

Cl 2.764806 -1.502901 -0.297609  
Na 0.979757 3.010295 1.192143  
Cl -1.149391 2.817380 -0.571713  
Na -2.455784 1.674283 1.519507  
Cl -3.986984 0.057784 0.196696  
Na -2.748438 1.016688 -1.945166  
Cl -0.870510 -0.995594 -2.078830

Na 0.813512 -3.059760 -1.426928  
Cl -0.307953 -3.569205 0.923522  
Na -2.165103 -1.819611 0.343620  
Cl -0.029080 0.572343 2.069365  
Na 1.283195 -1.751703 1.973159  
Na 0.819356 0.798152 -1.051001  
Na 4.497053 0.426896 -0.310552  
Cl 2.916816 2.429155 -0.432174

#### C7e

Cl 0.407472 3.738417 2.007096  
Na -1.321058 4.044756 0.000000  
Na 2.126579 3.396130 0.000000  
Cl 0.407472 3.738417 -2.007096  
Na -0.087553 1.145689 -1.958702  
Cl 1.886772 0.633287 0.000000  
Cl -2.119311 1.388739 0.000000  
Na -0.087553 1.145689 1.958702  
Na 1.363095 -1.908671 -0.000000  
Cl -0.687988 -1.785805 -2.051621  
Na -2.347895 -1.193430 -0.000000  
Cl -0.687988 -1.785805 2.051621  
Na -0.087553 -4.301464 -2.268465  
Cl 1.136182 -4.650754 -0.000000  
Na -0.087553 -4.301464 2.268465

#### C7f

Na -2.438162 2.493693 0.000000  
Cl -1.770454 -0.146049 0.000000  
Cl -0.817802 3.202473 1.989602  
Na 0.739312 4.080842 0.000000  
Cl 2.302233 1.730179 0.000000  
Na -1.526043 -2.191198 1.762258  
Cl -1.544351 -4.135010 0.000000  
Na 1.019878 -3.780352 0.000000  
Cl 1.242097 -1.779168 -1.941566  
Na 2.904642 -0.794605 0.000000  
Cl 1.242097 -1.779168 1.941566  
Na 0.539923 0.962890 1.959850  
Na -1.526043 -2.191198 -1.762258  
Cl -0.817802 3.202473 -1.989602  
Na 0.539923 0.962890 -1.959850

#### C7g

Na -3.447801 1.332418 0.156457  
Cl -3.830111 -1.124696 -0.500901  
Na -1.436666 -1.106994 -1.686983  
Na -2.530764 -1.915756 1.648173  
Cl 1.077283 -0.723400 -2.570734  
Na 2.079260 -2.576839 -0.944183  
Cl -0.284122 -2.617085 0.421346  
Na 0.955527 -0.462825 1.490877  
Cl 2.119203 2.244531 0.415749  
Na -0.350316 2.917627 1.173537  
Na 1.006417 1.807710 -2.035355  
Cl -1.476194 0.701504 2.210706  
Cl -1.455884 2.390595 -1.212416  
Na 4.353885 0.882539 0.529022  
Cl 3.442474 -1.439489 1.021721

#### C7h

Cl -3.013383 0.000000 0.195948  
Na -1.764191 1.815835 1.652739  
Na -1.764191 -1.815835 1.652739  
Cl -0.000000 -3.739243 1.188692  
Na -0.000000 -4.116548 -1.353021  
Cl 0.000000 -1.917855 -2.631009  
Na 1.794779 0.000000 -2.132785  
Cl 3.013383 -0.000000 0.195948  
Na 1.764191 -1.815835 1.652739  
Na -1.794779 0.000000 -2.132785  
Na 1.764191 1.815835 1.652739

Cl 0.000000 3.739243 1.188692  
Cl -0.000000 -0.000000 2.726104  
Cl 0.000000 1.917855 -2.631009  
Na 0.000000 4.116548 -1.353021

#### C7i

Na -2.358654 -2.498363 1.149596  
Cl -3.620277 -1.397146 -0.895606  
Na -1.101132 -0.669930 -1.459415  
Cl -1.492640 0.016707 2.052027  
Cl 0.020847 -2.779361 -0.016888  
Na 2.396728 -2.461035 -1.184328  
Cl 3.647513 -1.367313 0.871186  
Na 3.768162 1.002736 -0.103793  
Cl 1.806668 2.501874 0.851993  
Na 1.126051 -0.724859 1.500688  
Na -0.709024 2.516193 1.653083  
Cl -1.845850 2.479958 -0.817593  
Na 0.673675 2.574954 -1.614103  
Cl 1.511561 0.084299 -2.044387  
Na -3.838803 0.972731 0.057140

#### C7j

Na -4.341754 -0.008031 -1.649736  
Cl -2.032923 -1.160167 -1.653800  
Cl -4.185667 1.277023 0.598076  
Na -2.326536 3.066185 0.760009  
Cl -0.244648 1.544418 0.995811  
Na -0.477850 -3.219764 -0.627081  
Cl 1.795860 -1.909687 -1.060352  
Na 3.867886 -0.139697 -1.125891  
Cl 2.355747 1.950189 -1.925858  
Na 2.338100 2.447875 0.672922  
Cl -0.672862 -2.527106 1.925355  
Na -2.175850 -0.477038 1.358203  
Na 0.293163 0.305124 -1.699602  
Cl 3.717440 0.384041 1.504283  
Na 1.690104 -1.292662 1.718471

#### C7k

Cl 2.958452 3.587396 -0.000000  
Na 2.442612 1.039442 -0.000000  
Na 0.996333 3.821880 1.790313  
Na 0.996333 3.821880 -1.790313  
Cl -0.943496 4.162039 -0.000000  
Na -1.427764 1.601063 -0.000000  
Cl 0.632737 0.959846 1.997559  
Na -0.577465 -1.367776 2.165851  
Cl -0.577465 -3.998573 1.944618  
Na -2.448503 -3.651485 0.000000  
Cl -2.276418 -0.972457 0.000000  
Na -0.577465 -1.367776 -2.165851  
Cl 0.632737 0.959846 -1.997559  
Na 0.829153 -4.978312 0.000000  
Cl -0.577465 -3.998573 -1.944618

#### C7l

Cl -1.618166 -1.481956 1.945242  
Na -3.305576 -0.606076 -0.000000  
Cl -1.618166 -1.481956 -1.945242  
Na 0.217700 -1.730653 0.000000  
Na -0.457551 -1.342019 4.252855  
Cl 0.945906 0.762226 3.818150  
Na 2.701131 0.336911 1.888911  
Cl 1.227130 1.669778 0.000000  
Na -0.766350 1.728130 -1.886463  
Cl -2.648374 1.924381 -0.000000  
Na -0.766350 1.728130 1.886463  
Cl 2.852093 -1.578374 0.000000  
Na 2.701131 0.336911 -1.888911  
Na -0.457551 -1.342019 -4.252855  
Cl 0.945906 0.762226 -3.818150

C7m  
Na -4.043780 0.196582 0.902188  
Cl -1.659575 1.378370 1.815451  
Na -1.353966 2.024659 -0.910118  
Cl -3.559170 0.812834 -1.648743  
Na -2.550250 -1.634699 -1.731100  
Cl -3.000787 -2.274543 0.817312  
Na -0.780558 -1.154470 1.611580  
Cl 2.028320 -0.636055 1.999035  
Na 4.502081 -0.043308 1.197766  
Cl 0.097042 -1.022933 -1.376963  
Na 2.176096 -2.296124 -0.392737  
Cl 4.188565 -0.823755 -1.235454  
Na 2.149618 0.722669 -2.023092  
Cl 1.244119 2.750191 -0.660636  
Na 0.923057 1.900159 1.793692

C7n  
Cl 0.093039 -1.298964 3.469053  
Na 1.521754 -2.611525 1.761860  
Na -1.835294 -1.895325 1.835216  
Cl -1.939115 0.080807 0.000000  
Na -1.884526 2.754784 0.000000  
Cl -0.038012 3.331683 -1.892986  
Na 0.692569 0.817298 -2.005826  
Cl 0.093039 -1.298964 -3.469053  
Na -1.835294 -1.895325 -1.835216  
Na 0.692569 0.817298 2.005826  
Na 1.521754 -2.611525 -1.761860  
Cl 2.155632 -0.583170 -0.000000  
Cl -0.417980 -3.500331 -0.000000  
Na 1.267733 4.527353 0.000000  
Cl -0.038012 3.331683 1.892986

C7o  
Cl 1.659256 -2.782291 0.000000  
Na 0.691583 -1.732013 2.376812  
Cl -1.780244 -2.444866 -1.998261  
Na -2.551724 -0.881449 0.000000  
Cl -1.876188 1.689748 0.000000  
Na -2.378279 4.312340 0.000000  
Cl 0.213244 4.537879 0.000000  
Na 0.361031 2.465539 1.716049  
Cl 1.994798 0.549959 2.233061  
Na 0.691583 -1.732013 -2.376812  
Na 3.056557 -0.396682 0.000000  
Cl 1.994798 0.549959 -2.233061  
Na 0.361031 2.465539 -1.716049  
Cl -1.780244 -2.444866 1.998261  
Na -0.889248 -3.968885 0.000000

C7p  
Na 2.461219 -1.737087 -0.638249  
Cl 2.963295 0.410696 0.982775  
Na 1.749576 1.743155 2.930947  
Cl 0.000000 2.536131 0.096159  
Na 2.340365 1.984002 -1.089246  
Cl 2.305361 -0.075585 -2.766545  
Cl -2.305361 0.075585 -2.766545  
Na -2.461219 1.737087 -0.638249  
Cl -2.963295 -0.410696 0.982775  
Na -1.749576 -1.743155 2.930947  
Cl -0.000000 -2.536131 0.096159  
Na -2.340365 -1.984002 -1.089246  
Na -0.000000 -0.000000 0.972755  
Na 0.000000 0.000000 -3.841343  
Cl -0.000000 -0.000000 3.673957

C7q  
Na -1.095727 -3.627401 1.756721  
Cl -3.091948 -3.703553 0.000000

Na -3.242656 -1.057228 0.000000  
Na -1.095727 -3.627401 -1.756721  
Cl 0.923788 -3.623147 0.000000  
Na 0.658195 -0.985456 0.000000  
Cl -3.333580 1.664731 0.000000  
Na -1.474191 1.644924 -1.845986  
Cl -1.095727 -0.926551 -2.139857  
Na -1.474191 1.644924 1.845986  
Cl -1.095727 -0.926551 2.139857  
Cl 0.677158 1.928767 0.000000  
Na 2.922854 3.150564 0.000000  
Cl 5.206181 4.277466 0.000000  
Na 7.598493 4.879825 0.000000

C7r  
Cl 0.261734 -3.724504 1.944550  
Na 1.480565 -2.051297 -0.000000  
Na -1.134244 -1.537209 2.192899  
Cl -2.216404 -0.560463 -0.000000  
Na -0.479144 1.535264 0.000000  
Na -1.134244 -1.537209 -2.192899  
Cl 1.114966 0.009020 1.964603  
Na 1.275622 2.196225 3.276990  
Cl -0.354147 3.702846 1.994783  
Na -0.523939 5.306306 0.000000  
Cl -0.354147 3.702846 -1.994783  
Na 1.275622 2.196225 -3.276990  
Cl 1.114966 0.009020 -1.964603  
Cl 0.261734 -3.724504 -1.944550  
Na -0.495505 -5.203069 -0.000000

C7s  
Cl -2.520163 1.475213 -0.000000  
Na -2.379617 -0.500273 1.746375  
Na -2.379617 -0.500273 -1.746375  
Na 0.094734 1.941613 -0.000000  
Cl -2.705429 -2.503603 0.000000  
Na 0.710454 -2.235178 0.000000  
Cl 0.295346 -0.518994 -2.079662  
Na 1.727104 1.137216 -3.413780  
Cl 1.727104 3.253188 -1.968891  
Na 2.829735 4.487911 -0.000000  
Cl 1.727104 3.253188 1.968891  
Na 1.727104 1.137216 3.413780  
Cl 0.295346 -0.518994 2.079662  
Cl 0.785819 -4.786966 0.000000  
Na -1.719640 -4.932007 0.000000

C7t  
Na -1.203737 -1.235405 -2.007868  
Cl -0.335947 1.203804 -1.424155  
Cl 0.538646 -2.808639 -0.696177  
Na 1.611098 0.192792 0.566341  
Na -1.262351 -2.447025 1.339099  
Cl -0.359761 -0.193513 2.290733  
Na -2.036887 1.312450 0.875843  
Cl -3.221005 -1.720492 -0.360897  
Na 3.067493 -3.195201 -0.525680  
Cl 4.132729 -1.021573 0.318010  
Na 5.091544 1.382260 0.281300  
Na -5.244830 -0.058876 -0.201706  
Cl -4.382242 2.215939 0.409927  
Na 1.058684 3.375478 -1.455142  
Cl 2.928100 2.760286 0.192322

C7u  
Na 2.515594 -1.290004 0.238638  
Cl 2.961083 1.873090 -0.170870  
Na 0.927880 1.737055 1.554583  
Na 1.138029 1.283347 -2.059536  
Cl 0.700423 -1.313085 -1.858087  
Na -0.584566 -3.100465 -0.377954

Cl -3.104249 -2.544718 -0.343441  
Na -5.248466 -1.343917 0.400478  
Cl -4.349592 1.079645 0.641754  
Na -3.291036 3.241688 -0.220608  
Cl -0.824199 2.438458 -0.491552  
Na -1.845858 -0.152642 0.084121  
Cl 0.228367 -0.829863 1.726361  
Cl 5.025971 -1.532188 0.616959  
Na 5.402724 0.905596 0.193088

C7v  
Na 1.851639 -0.763868 2.516463  
Cl 0.103493 -2.771447 2.312478  
Na -1.583510 -0.788573 2.007749  
Na 1.223981 -3.211524 0.000000  
Cl -3.194772 0.232294 0.000000  
Na -1.583510 -0.788573 -2.007749  
Cl 0.103493 -2.771447 -2.312478  
Na 1.851639 -0.763868 -2.516463  
Cl 0.103493 1.182523 -2.149216  
Na 2.340243 1.952215 0.000000  
Na -0.718861 2.705677 0.000000  
Cl 2.919052 -0.820963 0.000000  
Cl 0.103493 1.182523 2.149216  
Na -5.614368 0.894900 0.000000  
Cl 1.306467 4.260620 0.000000

C7w  
Na 10.043533 6.617245 0.000000  
Cl 8.350607 4.836921 0.000000  
Na 5.978291 3.865084 0.000000  
Cl 3.613007 2.982396 0.000000  
Na 1.891162 1.155995 0.000000  
Cl 0.090387 -0.676983 0.000000  
Na -2.136392 -0.723712 1.779235  
Na -2.136392 -0.723712 -1.779235  
Cl -3.569593 0.644054 0.000000  
Na -5.988258 -0.335448 0.000000  
Cl -6.339466 -2.802347 0.000000  
Na -4.006940 -3.863829 0.000000  
Cl -2.136392 -3.320846 -1.940752  
Cl -2.136392 -3.320846 1.940752  
Na -0.356520 -3.429798 0.000000

C7x  
Na 4.785647 -0.514231 0.000000  
Cl 5.782009 -2.839941 0.000000  
Na 4.075513 -4.678697 0.000000  
Cl 2.297159 0.109201 0.000000  
Cl 1.464562 -4.643436 0.000000  
Na -0.812704 -5.913910 0.000000  
Cl -3.157205 -5.016956 0.000000  
Na -3.350609 -2.497532 0.000000  
Cl -1.478536 -0.739649 0.000000  
Na 0.813879 -2.054193 0.000000  
Na -0.000000 1.567587 0.000000  
Cl -0.452175 4.078601 0.000000  
Na -2.259839 5.806545 0.000000  
Cl -3.898646 7.790644 0.000000  
Na -4.112965 10.234077 0.000000

C7y  
Na 2.175570 -11.170815 0.000000  
Cl 4.293266 -9.751622 0.000000  
Na 3.780880 -7.307836 0.000000  
Cl -0.228013 -10.319625 0.000000  
Na -0.274598 -7.823462 0.000000  
Cl 1.538284 -5.902888 0.000000  
Na 1.304069 -3.311099 0.000000  
Cl 1.339156 -0.820196 0.000000  
Na 0.000000 1.345508 0.000000  
Cl -1.459820 3.399666 0.000000

Na -1.303998 5.923288 0.000000  
Cl -1.186819 8.456123 0.000000  
Na -2.639504 10.501996 0.000000  
Cl -3.867280 12.760671 0.000000  
Na -3.705069 15.207755 0.000000

#### C8a

Cl 1.972566 -1.972566 1.428461  
Na 0.000000 0.000000 1.680650  
Cl 1.972566 1.972566 1.428461  
Na 2.178688 2.178688 -1.379691  
Cl -0.000000 3.619864 -1.543023  
Na -2.178688 2.178688 -1.379691  
Cl -1.972566 1.972566 1.428461  
Na -0.000000 3.784771 1.136578  
Na 3.784771 -0.000000 1.136578  
Cl 3.619864 -0.000000 -1.543023  
Na 2.178688 -2.178688 -1.379691  
Cl -0.000000 -3.619864 -1.543023  
Na -2.178688 -2.178688 -1.379691  
Cl -3.619864 0.000000 -1.543023  
Na -3.784771 0.000000 1.136578  
Cl -1.972566 -1.972566 1.428461  
Na -0.000000 -3.784771 1.136578

#### C8b

Na 0.190062 1.715201 -3.651309  
Cl 0.000000 1.998529 -0.912622  
Na 2.389725 -0.469184 -1.270250  
Cl 2.003430 -0.203627 -3.830174  
Na -2.389725 0.469184 -1.270250  
Cl -0.000000 -1.998529 -0.912622  
Na 0.000000 0.000000 1.015803  
Cl 2.819980 0.472413 1.181984  
Na 1.432944 2.865706 1.176444  
Cl 0.122450 1.868047 3.303261  
Na 1.954120 -0.210197 3.635247  
Cl -0.122450 -1.868047 3.303261  
Na -1.432944 -2.865706 1.176444  
Cl -2.819980 -0.472413 1.181984  
Na -1.954120 0.210197 3.635247  
Na -0.190062 -1.715201 -3.651309  
Cl -2.003430 0.203627 -3.830174

#### C8c

Na -0.497632 -1.037498 0.000000  
Cl -2.663973 -0.617344 2.053446  
Na -1.609688 1.911597 2.262554  
Cl -0.226980 1.804185 0.000000  
Na 2.078778 1.023806 -2.058160  
Cl 3.691759 0.589777 -0.000000  
Na 3.067764 -1.985723 -0.000000  
Cl 0.249738 1.392956 -4.005265  
Na -1.609688 1.911597 -2.262554  
Cl -2.663973 -0.617344 -2.053446  
Na -4.183146 -1.035222 0.000000  
Cl 1.217913 -1.823455 1.965011  
Na -0.491052 -1.136668 3.860571  
Cl 0.249738 1.392956 4.005265  
Na 2.078778 1.023806 2.058160  
Na -0.491052 -1.136668 -3.860571  
Cl 1.217913 -1.823455 -1.965011

#### C8d

Na -0.000000 0.000000 0.491863  
Cl 1.929247 -0.575556 -3.539307  
Na 0.543395 1.642166 -3.318032  
Cl -0.000000 2.434005 -0.800051  
Na 1.816313 2.654263 1.124383  
Cl 2.767993 0.043751 0.927499  
Na 2.625972 -1.522485 -1.214829  
Cl -0.000000 -2.434005 -0.800051

Na -1.816313 -2.654263 1.124383  
Cl -2.767993 -0.043751 0.927499  
Na -0.543395 -1.642166 -3.318032  
Cl -0.482281 -1.836047 3.257248  
Na 1.820977 -0.543288 3.401491  
Cl 0.482281 1.836047 3.257248  
Na -1.820977 0.543288 3.401491  
Cl -1.929247 0.575556 -3.539307  
Na -2.625972 1.522485 -1.214829

#### C8e

Na -0.162373 0.845029 0.788526  
Cl 0.593436 3.397224 0.388187  
Na 2.977926 2.305946 0.094312  
Cl 3.984014 0.549767 -1.648620  
Na 1.897935 -0.852927 -2.365271  
Cl -0.508823 -0.033064 -1.850898  
Na -1.146772 -2.487350 -0.555737  
Cl -3.767851 -2.021669 -0.907240  
Na -3.797570 -0.656132 1.360060  
Cl -3.295645 1.811089 0.241921  
Na -1.878480 3.979747 0.082058  
Cl 1.752770 -2.752764 -0.254908  
Na 3.994410 -1.220659 0.274617  
Cl 2.546973 0.256527 1.972300  
Na -3.146400 0.288020 -1.993093  
Na 1.220615 -2.010589 2.358316  
Cl -1.278533 -1.330754 2.030926

#### C8f

Cl 0.094350 0.762554 2.236437  
Na -1.692749 -1.405371 2.629654  
Cl 0.135689 -3.275926 2.442681  
Na -0.685735 -3.823288 -0.000000  
Cl 0.135689 -3.275926 -2.442681  
Na 1.934051 -1.409260 -2.123974  
Cl 0.094350 0.762554 -2.236437  
Na -1.692749 -1.405371 -2.629654  
Cl -2.517620 -1.668494 -0.000000  
Na -1.424093 0.737364 0.000000  
Cl 1.347787 4.091779 0.000000  
Na -0.526200 3.591945 -1.832995  
Na 2.394688 1.748967 0.000000  
Cl 3.285919 -0.689138 -0.000000  
Na 1.934051 -1.409260 2.123974  
Na -0.526200 3.591945 1.832995  
Cl -2.391794 3.151751 0.000000

#### C8g

Na 1.405845 -1.855561 -1.086813  
Cl 4.057731 -1.603496 -0.955196  
Na 3.677734 -0.858517 1.551719  
Cl 1.147206 -1.730165 1.700624  
Na -1.423016 -2.391778 1.480405  
Cl -2.430150 -0.359375 2.710106  
Na 0.073225 0.723274 2.201793  
Cl 2.971664 1.734876 1.048390  
Na 3.731230 0.887771 -1.529715  
Cl 1.164094 1.060197 -2.282858  
Na 1.184670 3.043953 -0.412408  
Cl -1.175997 2.500272 0.547373  
Na -3.614150 1.343614 1.108241  
Cl -1.392875 -2.121559 -1.225573  
Na -1.434570 0.790069 -1.623878  
Na -3.926512 -1.861199 -1.898369  
Cl -4.131027 0.634668 -1.407614

#### C8h

Na 0.406253 -1.378553 2.701302  
Cl 3.114951 -0.686607 2.640676  
Na 2.461694 1.651261 3.482143  
Cl 0.019556 1.868505 2.676755

Na -2.619142 1.008175 2.667553  
Cl -2.914508 1.227501 -0.000000  
Na -0.203911 1.467106 -0.000000  
Cl 3.114951 -0.686607 -3.640676  
Na 3.152473 -1.111044 0.000000  
Cl 0.461354 -1.237202 0.000000  
Na 0.406253 -1.378553 -2.701302  
Cl -2.225433 -1.591207 -2.719254  
Na -2.619142 1.008175 -2.667553  
Cl -2.225433 -1.591207 2.719254  
Na -2.464801 -1.637700 -0.000000  
Na 2.461694 1.651261 -3.482143  
Cl 0.019556 1.868505 -2.676755

#### C8i

Na -1.829489 -0.003751 1.270874  
Cl -4.338088 -0.652131 0.592941  
Na -3.039886 -2.539081 -0.635624  
Cl -0.732487 -2.818938 0.771800  
Na 0.579567 -1.803125 -1.324835  
Cl 3.329463 -1.804138 0.775590  
Na 2.679578 0.850749 0.808239  
Cl 0.534441 0.526499 2.494329  
Na 0.075088 3.249582 1.726248  
Cl 1.996647 3.211574 -0.036945  
Na 0.291119 1.957115 -1.751091  
Cl -1.825668 2.535262 -0.011164  
Na -3.703631 1.104646 -1.259031  
Cl -1.669128 -0.561954 -2.130076  
Na 1.226431 -2.121891 2.441116  
Cl 2.277600 0.001885 -2.253772  
Na 4.381472 -1.371246 -1.589165

#### C8j

Na -1.166896 1.598330 -1.712048  
Cl 0.000000 4.044476 -0.992298  
Na 1.894539 3.640437 -2.696876  
Cl 1.721150 1.052661 -2.288123  
Na 1.166896 -1.598330 -1.712048  
Cl 1.652649 -1.202259 0.894951  
Na 1.759441 1.423784 0.484624  
Cl 1.256650 2.389679 2.881815  
Na -0.671749 3.644658 1.609846  
Cl -1.652649 1.202259 0.894951  
Na 0.000000 0.000000 3.094754  
Cl -1.256650 -2.389679 2.881815  
Na 0.671749 -3.644658 1.609846  
Cl -1.721150 -1.052661 -2.288123  
Na -1.759441 -1.423784 0.484624  
Na -1.894539 -3.640437 -2.696876  
Cl -0.000000 -4.044476 -0.992298

#### C8k

Na -1.230820 0.911541 0.154368  
Cl -2.610042 3.282597 -0.144172  
Na -0.356040 4.428339 0.437643  
Cl 1.214627 2.415138 0.823729  
Na 2.404844 0.962962 -1.262088  
Cl 0.149143 -0.467782 -1.741688  
Na 0.765112 -2.434608 0.224411  
Cl -1.437566 -3.826937 -0.342294  
Na -2.802527 -2.339630 1.348861  
Cl -3.763989 -0.618596 -0.611501  
Na -4.648103 1.806322 -0.740787  
Cl 3.019280 -1.348149 1.195501  
Na 1.558165 0.375977 2.572931  
Cl -0.830548 -0.769816 2.253496  
Na -1.988134 -2.027468 -2.189773  
Cl 4.903600 0.839530 -1.768540  
Na 5.301451 -0.919958 -0.027115

#### C8l

Na 0.027822 0.869727 0.000000  
Cl 2.857580 1.104417 0.000000  
Na 1.760363 1.134105 2.702627  
Cl 0.286539 -0.934797 2.071903  
Na 1.801719 -2.066930 0.000000  
Cl 0.286539 -0.934797 -2.071903  
Na 1.760363 1.134105 -2.702627  
Cl 0.286539 3.235559 -1.890594  
Na -1.718569 3.470533 0.000000  
Cl 0.286539 3.235559 1.890594  
Na 2.108168 3.751916 0.000000  
Cl -2.677432 0.976183 0.000000  
Na -2.359817 -1.101908 -1.790808  
Cl -2.896248 -2.970788 0.000000  
Na -2.359817 -1.101908 1.790808  
Cl 1.536284 -4.591680 0.000000  
Na -0.968215 -4.729110 0.000000

#### C8m

Na -0.393597 1.627137 1.948134  
Cl 0.042378 -1.132106 2.110575  
Na 0.042378 -3.730699 1.916385  
Cl -1.690877 -4.085324 0.000000  
Na 0.042378 -3.730699 -1.916385  
Cl 0.042378 -1.132106 -2.110575  
Na 1.734348 -0.787499 0.000000  
Cl 1.741678 1.828085 0.000000  
Na -0.393597 1.627137 -1.948134  
Cl -2.410043 1.233662 0.000000  
Na -2.032610 -1.368738 0.000000  
Cl -0.749453 4.257299 2.009928

Na -2.480552 3.964393 0.000000  
Cl -0.749453 4.257299 -2.009928  
Na 0.984466 4.448970 0.000000  
Cl 2.339571 -3.677450 0.000000  
Na 4.712686 -4.444466 0.000000

#### C8n

Na 1.291909 -0.178211 -0.000000  
Cl 2.112389 -1.841759 2.049962  
Na 1.559028 0.148470 3.549441  
Cl 1.215370 2.276715 2.075354  
Na -1.501984 2.123912 2.046980  
Cl -1.415516 -0.507614 2.139690  
Na -1.501984 2.123912 -2.046980  
Cl -1.415516 -0.507614 -2.139690  
Na -0.129765 -3.159359 -2.051738  
Cl -1.585064 -3.884550 -0.000000  
Na -0.129765 -3.159359 2.051738  
Cl -1.818162 3.704940 0.000000  
Na 0.890281 3.932429 0.000000  
Cl 2.112389 -1.841759 -2.049962  
Na -2.687787 -1.478105 -0.000000  
Cl 1.215370 2.276715 -2.075354  
Na 1.559028 0.148470 -3.549441

#### C8o

Na 0.570370 0.646189 0.000000  
Cl 0.063806 3.762253 0.000000  
Na -1.860228 3.018439 1.812820  
Cl -1.178098 0.427129 2.073129  
Na -1.178098 -2.215811 1.824853

Cl -3.053394 -2.516624 0.000000  
Na -1.178098 -2.215811 -1.824853  
Cl 0.895519 -2.496102 0.000000  
Na 4.126545 -1.246387 0.000000  
Cl 3.194366 1.186679 0.000000  
Na 2.647259 3.705151 0.000000  
Cl -1.178098 0.427129 -2.073129  
Na -1.860228 3.018439 -1.812820  
Cl -3.760424 2.750582 0.000000  
Na -3.422256 0.127211 0.000000  
Cl 4.803736 -3.686239 0.000000  
Na 2.483278 -4.613031 0.000000

#### C8p

Na -2.651034 -0.984530 0.000000  
Cl -1.345086 -3.340497 0.000000  
Na 0.073800 -2.985412 2.155240  
Cl -1.153062 -0.489760 2.581475  
Na -1.645097 2.071039 2.069506  
Cl 1.027397 2.511622 2.026891  
Na 1.221401 -0.269016 -0.000000  
Cl 2.330239 -1.608400 -2.065502  
Na 0.073800 -2.985412 -2.155240  
Cl -1.153062 -0.489760 -2.581475  
Na 1.351939 0.282414 -3.518197  
Cl 1.027397 2.511622 -2.026891  
Na 2.007482 3.743339 -0.000000  
Cl -3.154088 1.720362 0.000000  
Na -1.645097 2.071039 -2.069506  
Na 1.351939 0.282414 3.518197  
Cl 2.330239 -1.608400 2.065502

## 6.2 Structures Cationic Clusters: $\omega$ B97XD/aug-cc-pVDZ

#### C1a

Na 0.000000 -0.000000 2.523338  
Cl 0.000000 0.000000 0.000000  
Na 0.000000 0.000000 -2.523338

#### C2a

Cl 0.000000 0.000000 1.757538  
Na -0.000000 2.021445 -0.000000  
Na -1.750623 -1.010723 -0.000000  
Na 1.750623 -1.010723 0.000000  
Cl 0.000000 0.000000 -1.757538

#### C2b

Cl 0.000000 0.000000 2.586962  
Na 0.000000 0.000000 5.073551  
Na 0.000000 0.000000 0.000000  
Cl 0.000000 0.000000 -2.586962  
Na 0.000000 0.000000 -5.073551

#### C2c

Na -0.000000 1.770611 0.874703  
Cl -0.000000 0.000000 2.661573  
Na -0.000000 -1.770611 0.874703  
Cl 0.000000 0.000000 -1.302555  
Na 0.000000 0.000000 -3.849707

#### C3a

Cl 0.000000 2.293313 0.127876  
Na 0.000000 0.000000 1.566539  
Na 0.000000 -2.665341 -0.719806  
Cl -1.986067 -1.146656 0.127876  
Na -2.308253 1.332670 -0.719806  
Na 2.308253 1.332670 -0.719806  
Cl 1.986067 -1.146656 0.127876

#### C3b

Na 0.267255 -0.811519 -0.226046

Cl -2.417424 0.003310 -0.036237  
Na -4.454043 -1.521021 0.101021  
Cl 2.481607 -2.030603 0.035081  
Na 3.482260 0.303463 0.145504  
Cl 1.204261 1.753918 -0.076204  
Na -1.255795 2.451566 0.099078

#### C3c

Na 0.000000 1.723767 3.039589  
Cl 0.000000 0.000000 4.886898  
Na -0.000000 -1.723767 3.039589  
Cl 0.000000 0.000000 0.922463  
Na -0.000000 -0.000000 -1.693293  
Cl -0.000000 -0.000000 -4.270198  
Na -0.000000 -0.000000 -6.764591

#### C3d

Na -0.000000 7.607263 -0.005807  
Cl 0.011650 5.133393 -0.154397  
Na -0.017976 2.536495 0.034327  
Cl 0.000000 -0.000000 0.271887  
Na 0.017976 -2.536495 0.034327  
Cl -0.011650 -5.133393 -0.154397  
Na -0.000000 -7.607263 -0.005807

#### C4a

Cl 0.000000 2.759279 0.390036  
Na -2.574779 2.574765 0.000096  
Cl -2.759173 0.000000 -0.390209  
Na 0.000000 0.000000 0.000149  
Na -2.574779 -2.574765 0.000096  
Cl -0.000000 -2.759279 0.390036  
Na 2.574779 -2.574765 0.000096  
Cl 2.759173 -0.000000 -0.390209  
Na 2.574779 2.574765 0.000096

#### C4b

Na -0.365994 0.745458 1.742544  
Cl -0.365994 -1.882461 1.902633  
Na -1.848530 -2.920032 -0.000000  
Cl -0.365994 -1.882461 -1.902633  
Na -0.365994 0.745458 -1.742544  
Cl -1.276805 2.591388 0.000000  
Na 1.566496 -1.753656 -0.000000  
Na 1.176087 3.528914 0.000000  
Cl 1.903926 0.949561 0.000000

#### C4c

Cl -0.747654 1.886156 -1.644453  
Na 0.000000 3.535404 0.206022  
Cl 1.527664 1.717476 1.395844  
Na -0.000000 -0.000000 2.628725  
Cl -1.527664 -1.717476 1.395844  
Na -0.000000 -3.535404 0.206022  
Na -1.588997 -0.590093 -1.136171  
Na 1.588997 0.590093 -1.136171  
Cl 0.747654 -1.886156 -1.644453

#### C4d

Na -0.000000 2.169723 0.105689  
Cl 2.016481 1.164216 -1.222212  
Na 1.879035 -1.084861 0.105689  
Cl -0.000000 -2.328432 -1.222212  
Na -1.879035 -1.084861 0.105689  
Cl -2.016481 1.164216 -1.222212  
Na 0.000000 0.000000 -2.638301  
Cl 0.000000 0.000000 2.137574  
Na 0.000000 0.000000 4.684332

#### C4e

Na 0.000000 1.173985 0.000000  
Cl -1.764548 -0.825463 0.000000  
Na -3.622222 0.915298 0.000000  
Cl -2.038303 3.141354 0.000000

Na -1.936839 5.681578 0.000000  
Cl 2.211356 -0.164474 0.000000  
Na 0.480428 -2.417390 0.000000  
Na 3.922597 -2.212722 0.000000  
Cl 2.339517 -4.183666 0.000000

C4f

Na -1.460626 -1.204091 -0.000000  
Cl -3.889323 0.136867 -0.000000  
Na -2.416431 2.241198 -0.000000  
Cl 0.000000 1.136319 0.000000  
Na 2.604188 1.381952 0.000000  
Cl -2.397786 -3.584077 -0.000000  
Na -4.660065 -2.433153 -0.000000  
Cl 5.176345 1.530208 0.000000  
Na 7.649569 1.220602 0.000000

C4i

Cl 7.611859 0.059310 0.000000  
Na 5.015111 0.287465 0.000000  
Cl 2.496632 0.599929 0.000000  
Na 0.000000 0.016822 0.000000  
Cl -2.496741 -0.567584 0.000000  
Na -5.017088 -0.266458 0.000000  
Na 10.063396 0.399053 0.000000  
Cl -7.616294 -0.060826 0.000000  
Na -10.054398 -0.484527 0.000000

C5a

Na -2.090773 -0.921799 0.000000  
Cl -0.662961 0.215828 2.057905  
Na 0.742725 -2.285863 1.775920  
Cl 2.496522 -1.361424 0.000000  
Na 1.176374 0.896535 -0.000000  
Cl -0.662961 0.215828 -2.057905  
Na -0.662961 2.848157 -2.353780  
Cl 0.300832 3.489678 -0.000000  
Na -0.662961 2.848157 2.353780  
Na 0.742725 -2.285863 -1.775920  
Cl -0.982985 -3.271237 0.000000

C5b

Cl -0.000000 2.244458 0.000000  
Na -1.727843 0.997571 1.794556  
Na 1.727843 0.997571 1.794556  
Na -1.727843 0.997571 -1.794556  
Na 1.727843 0.997571 -1.794556  
Cl 0.000000 0.000000 3.482239  
Na -0.000000 -1.995141 1.794556  
Cl 0.000000 -0.000000 -3.482239  
Na -0.000000 -1.995141 -1.794556  
Cl -1.943758 -1.122229 0.000000  
Cl 1.943758 -1.122229 0.000000

C5c

Na 2.187488 -0.000000 0.236223  
Cl 1.952625 2.585662 -0.403976  
Na 0.000000 3.347861 -1.976658  
Cl -1.952625 2.585662 -0.403976  
Na -2.187488 0.000000 0.236223  
Cl -1.952625 -2.585662 -0.403976  
Na 0.000000 -2.642192 1.458241  
Cl 0.000000 0.000000 1.981097  
Na 0.000000 2.642192 1.458241  
Cl 1.952625 -2.585662 -0.403976  
Na -0.000000 -3.347861 -1.976658

C5e

Na 1.686731 1.165855 3.344636  
Cl 0.000000 1.993080 -2.827461  
Na 0.000000 0.000000 -4.500579  
Cl -1.688240 -1.564828 0.737071

Na -1.686731 -1.165855 3.344636  
Cl -0.000000 -1.993080 -2.827461  
Na 1.512823 3.316924 -1.181990  
Cl -0.000000 -0.000000 4.828464  
Na -1.512823 -3.316924 -1.181990  
Cl 1.688240 1.564828 0.737071  
Na 0.000000 0.000000 -0.825679

C5f

Na 0.126532 3.394574 -0.786774  
Cl 2.438291 2.254844 -0.498616  
Na 4.462602 0.827661 0.377091  
Cl -1.474802 1.502552 0.129300  
Cl 3.211546 -1.355831 1.051475  
Na 1.984564 -3.410225 -0.038481  
Cl -0.065376 -2.161511 -1.034274  
Na -2.550379 -1.244068 -0.882252  
Na 0.964518 0.016193 0.173715  
Cl -4.784950 -0.825139 0.281342  
Na -3.944208 1.320091 1.266078

C5g

Na 0.000000 0.000000 -4.162486  
Cl 2.019577 1.166004 -2.771365  
Na -0.000000 2.120338 -1.386905  
Cl -2.019577 1.166004 -2.771365  
Na -1.836266 -1.060169 -1.386905  
Cl 0.000000 0.000000 0.555827  
Na 0.000000 0.000000 3.176591  
Cl 0.000000 0.000000 5.751345  
Na 0.000000 0.000000 8.248220  
Na 1.836266 -1.060169 -1.386905  
Cl -0.000000 -2.332007 -2.771365

C5i

Cl 0.573849 -1.886249 0.523798  
Na -1.301810 -3.562912 -0.021734  
Cl -3.304865 -1.961829 -0.530414  
Na -1.338150 -0.009956 -0.005290  
Na -4.955951 -0.043854 0.059935  
Cl -3.326555 1.904410 0.600534  
Na -1.389832 3.553600 -0.012625  
Cl 0.491463 1.909593 -0.626313  
Na 2.375997 0.054793 -0.058374  
Cl 5.016784 0.138340 -0.030402  
Na 7.458702 -0.152808 0.135140

C5j

Na 4.168600 0.623415 0.004143  
Cl 6.487308 -0.496524 -0.004432  
Na 5.172331 -2.655049 -0.003633  
Cl 2.668610 -1.773903 0.005788  
Na 0.626478 -0.161140 0.000699  
Cl 1.937909 2.188664 0.001659  
Na -0.385436 3.259953 -0.000727  
Cl -1.868273 1.041365 -0.001835  
Na -4.311304 0.116496 -0.001532  
Cl -6.759750 -0.690591 -0.000709  
Na -9.081458 -1.599420 0.000321

C5k

Na -3.526200 0.769843 -0.000198  
Cl -4.607963 3.095850 -0.000122  
Na -6.792521 1.806573 0.000303  
Cl -5.889210 -0.710434 0.000151  
Na -4.274736 -2.715444 -0.000117  
Cl -1.945674 -1.467000 -0.000167  
Na 0.688319 -1.494914 -0.000120  
Cl 3.219497 -1.328636 0.000177  
Na 5.565242 -0.314201 0.000175  
Cl 7.942267 0.737819 -0.000043  
Na 10.319751 1.441856 -0.000037

C6a

Na 0.000000 2.899951 1.335582  
Cl -2.149027 1.240741 1.395717  
Na -2.511431 -1.449976 1.335582  
Cl -2.149027 -1.240741 -1.395717  
Na -2.511431 1.449976 -1.335582  
Cl -0.000000 2.481482 -1.395717  
Na 2.511431 1.449976 -1.335582  
Cl 2.149027 1.240741 1.395717  
Na 2.511431 -1.449976 1.335582  
Cl 2.149027 -1.240741 -1.395717  
Na 0.000000 0.000000 0.000000  
Cl -0.000000 -2.481482 1.395717  
Na -0.000000 -2.899951 -1.335582

C6b

Na 0.000000 0.000000 2.733929  
Cl 2.034663 1.174713 1.456234  
Na 2.115207 1.221215 -1.453103  
Cl -0.000000 2.785963 -1.693114  
Na -2.115207 1.221215 -1.453103  
Cl -2.412715 -1.392982 -1.693114  
Na -0.000000 -2.442431 -1.453103  
Cl -0.000000 -2.349427 1.456234  
Na -0.000000 2.978990 0.907880  
Cl -2.034663 1.174713 1.456234  
Na -2.579881 -1.489495 0.907880  
Cl 2.412715 -1.392982 -1.693114  
Na 2.579881 -1.489495 0.907880

C6c

Na 2.151013 1.806011 0.295867  
Cl -0.000000 3.228703 -0.314179  
Na -2.151013 1.806011 0.295867  
Na -0.000000 1.778636 -2.498519  
Cl 1.981005 -0.000000 -1.856945  
Cl -1.981005 0.000000 -1.856945  
Cl 2.240899 -0.000000 2.245553  
Na -0.000000 -1.778636 -2.498519  
Cl -0.000000 -3.228703 -0.314179  
Na -2.151013 -1.806011 0.295867  
Na 2.151013 -1.806011 0.295867  
Cl -2.240899 0.000000 2.245553  
Na -0.000000 0.000000 3.583518

C6d

Na 1.824370 2.611928 0.269576  
Cl 0.000000 2.672780 2.112079  
Na 0.000000 -0.000000 1.946420  
Cl -2.562325 0.000000 0.257829  
Na -1.675037 0.000000 -2.220054  
Cl 0.000000 2.115740 -1.911989  
Na 1.675037 -0.000000 -2.220054  
Cl -0.000000 -2.115740 -1.911989  
Na -1.824370 -2.611928 0.269576  
Cl -0.000000 -2.672780 2.112079  
Na 1.824370 -2.611928 0.269576  
Na -1.824370 2.611928 0.269576  
Cl 2.562325 -0.000000 0.257829

C6e

Na 2.780250 0.720688 -1.364037  
Cl 2.595781 -1.868802 -1.191258  
Na 2.373505 -1.589667 1.393802  
Cl -0.325924 -1.933007 1.683897  
Na -2.743518 -2.658462 0.818107  
Cl -2.701867 -1.346768 -1.406045  
Na -2.426602 1.295456 -1.289887  
Cl -1.923966 2.371896 1.118510  
Na 0.424095 3.049481 0.140218  
Cl 0.258793 1.463371 -2.034576

Na -0.014104 -1.306829 -1.322570  
Cl 2.102240 1.211069 1.344711  
Na -0.401442 0.647344 2.373542

C6f

Cl -0.571746 0.271940 1.933223  
Na -0.571746 3.165019 1.760260  
Cl -2.571947 3.261043 0.000000  
Na -0.571746 3.165019 -1.760260  
Cl -0.571746 0.271940 -1.933223  
Na 1.482602 0.692390 0.000000  
Cl 1.414132 3.304366 0.000000  
Na 0.169189 -2.255452 1.747067  
Cl 2.362397 -1.936066 0.000000  
Na 2.244894 -4.616551 0.000000  
Cl -0.358567 -4.244863 0.000000  
Na 0.169189 -2.255452 -1.747067  
Na -2.462647 0.670287 0.000000

C6g

Na 0.112431 1.009052 2.314095  
Cl 0.112431 -1.640032 2.467895  
Na -0.475787 -4.173449 2.413047  
Cl -1.459651 -4.386747 -0.000000  
Na -1.084588 -1.632867 -0.000000  
Cl -1.409517 1.123521 0.000000  
Na -0.618980 3.689287 0.000000  
Cl 1.182636 3.441126 1.986087  
Na 2.861514 3.748522 0.000000  
Cl 1.182636 3.441126 -1.986087  
Na 0.112431 1.009052 -2.314095  
Cl 0.112431 -1.640032 -2.467895  
Na -0.475787 -4.173449 -2.413047

C6h

Na -1.633071 -1.941269 1.467229  
Cl -3.774743 -1.554987 0.057586  
Na -2.029312 -0.692021 -1.775036  
Cl 0.196759 -2.060785 -0.611040  
Na 2.663514 -2.940030 -1.001947  
Cl 3.971964 -1.128487 0.319182  
Na 4.604881 1.369019 -0.246155  
Cl 2.228489 2.405350 -0.104395  
Na -0.394902 2.761731 0.002045  
Cl -0.979423 0.688278 1.863048  
Na 1.495195 -0.006760 0.836504  
Na -3.565318 0.997386 0.687116  
Cl -2.381331 1.943065 -1.504812

C6i

Na 1.881721 -1.906150 1.712011  
Cl -0.779871 -1.146137 2.061202  
Na -1.102211 -2.908153 0.000000  
Cl -0.779871 -1.146137 -2.061202  
Na 0.005214 0.950329 -0.000000  
Cl -0.779871 2.877097 1.979815  
Na -1.472638 0.923042 -3.505541  
Cl -0.779871 2.877097 -1.979815  
Na -1.472638 0.923042 3.505541  
Cl 1.338242 -3.869329 0.000000  
Na -0.866706 4.553423 -0.000000  
Cl 2.522474 0.000161 0.000000  
Na 1.881721 -1.906150 -1.712011

C6j

Na 4.393851 1.210307 -1.268599  
Cl 2.507112 2.188191 0.241696  
Na 3.037444 0.102794 1.857753  
Cl 4.234124 -1.185515 -0.219296  
Cl -0.578552 -1.029856 -1.724161  
Na 0.000198 1.259762 -0.000826  
Cl -2.506717 2.187657 -0.242926

Na -3.037771 0.101546 -1.857642  
Na -4.393990 1.211359 1.267813  
Cl -4.234311 -1.185301 0.220426  
Na -1.735273 -1.901324 0.641608  
Na 1.735354 -1.903348 -0.640248  
Cl 0.578465 -1.027650 1.724351

C6k

Na 0.843847 -3.558800 2.256273  
Cl -0.258463 -4.299558 -0.000000  
Na 0.843847 -3.558800 -2.256273  
Cl 0.380999 -0.994590 2.122525  
Na -1.144943 1.288811 2.487998  
Cl 0.843847 2.928446 1.998023  
Na 0.745217 4.569303 0.000000  
Cl 0.843847 2.928446 -1.998023  
Na -1.144943 1.288811 -2.487998  
Cl 0.380999 -0.994590 -2.122525  
Na 1.001047 1.012588 0.000000  
Cl -2.136579 0.853605 0.000000  
Na -1.228530 -1.693726 -0.000000

C6l

Na 2.980686 -1.645105 0.291571  
Cl 4.009270 0.741921 0.208704  
Na 2.304278 0.972743 -1.818673  
Cl 0.457468 2.369511 -0.311837  
Na -1.860177 3.647235 -0.251359  
Cl -3.336655 1.601295 0.245139  
Na -4.651132 -0.661272 0.194975  
Cl -2.684122 -2.248635 -0.313079  
Na -0.258540 -3.092815 0.032643  
Cl 0.782117 -1.241182 1.859622  
Na -1.031804 -0.038735 -0.150028  
Na 1.913522 1.244144 1.751054  
Cl 1.162208 -1.498684 -1.721021

C6n

Na -0.167527 -2.962890 1.741694  
Cl -2.168164 -3.001064 0.000000  
Cl 1.867795 -2.954683 0.000000  
Na 1.535823 -0.333475 0.000000  
Cl -0.167527 -0.222159 -2.115937  
Na -2.153501 -0.333312 0.000000  
Na -0.167527 -2.962890 -1.741694  
Cl -0.167527 -0.222159 2.115937  
Na -0.531478 2.364016 1.850580  
Cl 1.734051 2.664654 0.000000  
Na 3.960773 3.899272 0.000000  
Cl -2.357213 2.418817 0.000000  
Na -0.531478 2.364016 -1.850580

C6o

Cl 4.070787 -0.926931 -0.919818  
Na 2.448425 -2.295664 0.701652  
Na 1.912928 -0.150931 -2.149525  
Na 3.647494 1.033945 0.823752  
Cl 2.107858 -0.341931 2.493580  
Na 0.042748 0.387802 1.066391  
Cl 0.093787 -1.657030 -0.793359  
Na -2.589314 -1.492183 -0.880727  
Cl -2.408213 1.412652 0.272441  
Na -0.909877 3.309209 -0.810701  
Cl 1.433498 2.148023 -0.684575  
Na -4.970139 0.673927 0.935839  
Cl -5.027418 -1.583439 -0.165532

C6p

Na 1.465974 -2.508627 1.724505  
Cl 2.760900 -0.686605 0.000000  
Cl -0.583618 -0.687484 1.954474  
Cl 0.429206 -4.164160 0.000000

Na -1.543469 -2.424976 0.000000  
Na 1.465974 -2.508627 -1.724505  
Cl -0.583618 -0.687484 -1.954474  
Na -1.669703 1.121074 0.000000  
Cl 0.614845 2.895861 0.000000  
Na 1.465974 1.050848 1.724647  
Na 1.465974 1.050848 -1.724647  
Na -1.509437 4.697601 0.000000  
Cl -3.376195 3.020487 0.000000

C6r

Na -0.280008 3.615690 -0.187199  
Cl -1.733880 1.782250 0.925793  
Cl 1.692255 2.187471 -1.097455  
Na 4.001091 0.954153 -0.726642  
Cl 2.587925 -1.610966 0.136581  
Na 0.780163 -3.201676 -0.972286  
Cl -1.353819 -1.805716 -0.774884  
Na -3.374810 -0.188246 0.066968  
Cl -5.999761 -0.448513 0.035539  
Na -8.389389 -0.262068 0.618227  
Na 0.290946 0.170964 0.076778  
Na 4.950774 -1.731620 1.439865  
Cl 6.115137 0.311404 0.570142

C6s

Cl 0.001019 3.448086 -0.000000  
Na -0.000397 0.742325 -0.000000  
Cl -0.000632 -1.067580 1.958819  
Cl 0.000534 2.674199 4.598859  
Na 0.000534 0.151047 4.264983  
Na 0.001855 4.160125 2.551024  
Na 0.001855 4.160125 -2.551024  
Cl 0.000534 2.674199 -4.598859  
Na 0.000534 0.151047 -4.264983  
Cl -0.000632 -1.067580 -1.958819  
Na 0.000943 -2.955218 0.000000  
Cl 0.000568 -5.592159 0.000000  
Na -0.015375 -8.061798 0.000000

C6t

Na 12.195509 -1.387567 -0.000263  
Cl 9.773076 -0.855439 -0.000198  
Na 7.257341 -0.201786 0.000104  
Cl 4.786854 0.450832 0.000337  
Na 2.283399 0.870603 0.000146  
Cl -0.279677 1.452551 -0.000115  
Na -2.021926 3.454254 -0.000228  
Cl -4.200740 2.108975 0.000038  
Na -2.586018 -0.052448 0.000259  
Cl -4.407630 -1.917485 0.000337  
Na -6.203414 0.268698 0.000067  
Cl -8.358094 -1.138862 -0.000403  
Na -6.773474 -3.107183 -0.000078

C6u

Na -8.332777 0.240086 0.018525  
Cl -5.807842 0.031453 0.191064  
Na -3.401197 -0.842602 0.128590  
Cl -0.968595 -1.668362 0.049905  
Na 1.552842 -1.502834 -0.008951  
Cl 4.184886 -1.327740 -0.054885  
Na 6.517318 -2.553294 -0.065761  
Cl 8.119322 -0.537880 -0.047932  
Na 5.737552 0.928324 -0.032630  
Cl 6.811843 3.259133 0.026026  
Na 9.001431 1.982167 0.013178  
Cl -10.917847 0.534906 -0.136164  
Na -13.272444 1.297637 -0.096244

C7a

Cl 0.000000 2.391102 1.084222



Na 1.818204 1.049741 2.629911  
Na -1.818204 1.049741 2.629911  
Na 0.000000 0.000000 -0.341706  
Cl 0.000000 0.000000 4.248422  
Na -0.000000 -2.099481 2.629911  
Cl -2.070755 -1.195551 1.084222  
Na -2.544641 -1.469149 -1.544241  
Cl -1.902929 1.098656 -2.302877  
Na 0.000000 0.000000 -3.830923  
Cl 1.902929 1.098656 -2.302877  
Na 2.544641 -1.469149 -1.544241  
Cl 2.070755 -1.195551 1.084222  
Na 0.000000 2.938299 -1.544241  
Cl -0.000000 -2.197313 -2.302877

#### C7b

Na 0.000000 0.000000 -2.729812  
Cl 0.000000 2.685987 -2.903485  
Na -1.798473 -2.656562 -0.992576  
Cl -0.000000 -0.000000 3.874193  
Na 0.000000 2.594638 3.695896  
Cl 2.082985 -0.000000 -0.707599  
Na 1.798473 2.656562 -0.992576  
Cl -0.000000 -2.959785 1.102542  
Na -0.000000 -0.000000 1.074610  
Cl -0.000000 -2.685987 -2.903485  
Na -0.000000 -2.594638 3.695896  
Cl -2.082985 0.000000 -0.707599  
Na -1.798473 2.656562 -0.992576  
Cl 0.000000 2.959785 1.102542  
Na 1.798473 -2.656562 -0.992576

#### C7c

Na -2.276136 -1.831312 -1.859051  
Cl -3.754559 -1.212273 0.281603  
Na -1.641713 -2.057986 1.583939  
Na -3.072225 1.302259 -0.037545  
Cl 0.617926 -0.677909 2.160414  
Na 0.547909 2.017593 2.032554  
Cl -1.552297 3.221736 0.950173  
Na -0.195513 3.131651 -1.335347  
Cl 2.115351 2.258053 -0.223636  
Na 0.975776 -0.394801 -0.752696  
Na 2.024624 -2.830938 0.992698  
Cl -1.202562 0.699886 -2.048623  
Cl -0.232315 -3.016132 -0.532278  
Cl 3.513325 -1.454051 -0.679901  
Na 4.402480 0.942783 -0.481988

#### C7d

Cl -2.114848 2.256607 -0.219708  
Na -2.023188 -2.830503 0.992990  
Cl 0.232578 -3.018036 -0.535420  
Na 1.643747 -2.067739 1.583279  
Cl 3.753648 -1.212229 0.281365  
Na 2.273932 -1.824362 -1.861303  
Cl 1.200199 0.703106 -2.050729  
Na 0.193257 3.134719 -1.333471  
Cl 1.552864 3.225138 0.950911  
Na 3.066327 1.301007 -0.037041  
Cl -0.611907 -0.679604 2.157027  
Na -0.544183 2.015836 2.033683  
Na -0.976083 -0.395758 -0.755292  
Na -4.404142 0.942694 -0.478719  
Cl -3.514083 -1.453503 -0.676704

#### C7e

Cl 0.511661 3.722965 2.026533  
Na -1.182477 4.079443 0.000000  
Na 2.191477 3.314816 0.000000  
Cl 0.511661 3.722965 -2.026533  
Na -0.067419 1.136274 -1.886809

Cl 1.898939 0.562331 0.000000  
Cl -2.099374 1.464749 0.000000  
Na -0.067419 1.136274 1.886809  
Na 1.144224 -1.947912 -0.000000  
Cl -0.741527 -1.753934 -2.065822  
Na -2.400701 -1.118628 -0.000000  
Cl -0.741527 -1.753934 2.065822  
Na -0.067419 -4.293321 -2.371351  
Cl 0.994794 -4.679840 -0.000000  
Na -0.067419 -4.293321 2.371351

#### C7f

Na -2.405010 2.640051 0.000000  
Cl -1.692149 -0.078399 0.000000  
Cl -0.783593 3.247857 2.004974  
Na 0.809102 4.046372 0.000000  
Cl 2.312789 1.693886 0.000000  
Na -1.512748 -2.199011 1.767987  
Cl -1.612122 -4.134216 0.000000  
Na 0.974510 -3.803511 0.000000  
Cl 1.228254 -1.819829 -1.937165  
Na 2.915615 -0.848830 0.000000  
Cl 1.228254 -1.819829 1.937165  
Na 0.444582 0.921308 1.825800  
Na -1.512748 -2.199011 -1.767987  
Cl -0.783593 3.247857 -2.004974  
Na 0.444582 0.921308 -1.825800

#### C7i

Na -2.430870 -2.459988 1.059060  
Cl -3.596063 -1.399505 -1.052520  
Na -1.061364 -0.561796 -1.511162  
Cl -1.731841 0.100992 2.074904  
Cl 0.004725 -2.622658 0.002681  
Na 2.435743 -2.450110 -1.062506  
Cl 3.604079 -1.390571 1.047472  
Na 3.719738 0.872016 -0.168178  
Cl 1.737736 2.326501 0.970700  
Na 1.067592 -0.562556 1.522014  
Na -0.828844 2.573850 1.592090  
Cl -1.747186 2.330262 -0.967131  
Na 0.819071 2.573735 -1.587261  
Cl 1.729723 0.106649 -2.080782  
Na -3.722880 0.862268 0.163169

#### C7j

Na -4.406173 0.028099 1.719752  
Cl -2.046391 1.193383 1.622845  
Cl -4.221640 -1.335940 -0.511223  
Na -2.371531 -3.111508 -0.947382  
Cl -0.214876 -1.571815 -0.861676  
Na -0.508974 3.236156 0.468022  
Cl 1.796357 1.981456 0.926250  
Na 3.917732 0.266711 1.016068  
Cl 2.508962 -1.790384 2.042042  
Na 2.441904 -2.453466 -0.508901  
Cl -0.775286 2.417912 -2.035257  
Na -2.204183 0.432627 -1.110708  
Na 0.389450 -0.228598 1.685176  
Cl 3.719145 -0.431548 -1.564489  
Na 1.557538 1.114333 -1.732423

#### C7k

Cl 3.060928 3.593639 -0.000000  
Na 2.518626 1.055768 -0.000000  
Na 1.073201 3.798956 1.769945  
Na 1.073201 3.798956 -1.769945  
Cl -0.869897 4.189811 -0.000000  
Na -1.220590 1.594432 -0.000000  
Cl 0.677770 0.955175 1.998991  
Na -0.687977 -1.346616 2.210128  
Cl -0.687977 -4.010402 1.957375

Na -2.499237 -3.588633 0.000000  
Cl -2.300622 -0.907114 0.000000  
Na -0.687977 -1.346616 -2.210128  
Cl 0.677770 0.955175 -1.998991  
Na 0.631670 -5.149879 0.000000  
Cl -0.687977 -4.010402 -1.957375

#### C7l

Cl -1.522640 -1.438217 1.979930  
Na -3.293815 -0.795153 0.000000  
Cl -1.522640 -1.438217 -1.979930  
Na 0.369932 -1.366901 -0.000000  
Na -0.376380 -1.361442 4.356479  
Cl 0.946714 0.798739 3.849545  
Na 2.723047 0.473552 1.892546  
Cl 1.020101 1.542999 -0.000000  
Na -0.954322 1.485352 -1.923270  
Cl -2.826063 1.776269 0.000000  
Na -0.954322 1.485352 1.923270  
Cl 3.047880 -1.414521 -0.000000  
Na 2.723047 0.473552 -1.892546  
Na -0.376380 -1.361442 -4.356479  
Cl 0.946714 0.798739 -3.849545

#### C7m

Na -4.042841 0.808347 0.003730  
Cl -1.692631 2.312890 0.000009  
Na -0.920962 0.445001 -1.828409  
Cl -3.249187 -0.781930 -2.003951  
Na -2.637207 -2.405012 -0.001884  
Cl -3.244043 -0.786336 2.005920  
Na -0.919010 0.443699 1.824148  
Cl 1.818094 1.226928 1.939510  
Na 3.798191 0.971147 0.002845  
Cl 0.079112 -1.692025 -0.004797  
Na 2.193961 -1.515642 1.767991  
Cl 4.130720 -1.613355 0.000572  
Na 2.200938 -1.509394 -1.772550  
Cl 1.820050 1.230718 -1.936512  
Na 0.849117 2.921205 0.002968

#### C7n

Cl 0.059372 -1.332634 3.488740  
Na 1.550840 -2.580587 1.772712  
Na -1.813821 -1.975584 1.816078  
Cl -1.812234 0.116279 -0.000000  
Na -1.838783 2.874970 -0.000000  
Cl -0.026827 3.369409 -1.908692  
Na 0.510486 0.767024 -1.918722  
Cl 0.059372 -1.332634 -3.488740  
Na -1.813821 -1.975584 -1.816078  
Na 0.510486 0.767024 1.918722  
Na 1.550840 -2.580587 -1.772712  
Cl 2.152040 -0.570111 0.000000  
Cl -0.386943 -3.517971 0.000000  
Na 1.316026 4.546080 -0.000000  
Cl -0.026827 3.369409 1.908692

#### C7p

Na 2.479292 -1.793437 -0.538669  
Cl 2.859520 0.399277 1.000353  
Na 1.466371 1.981138 2.762397  
Cl 0.000000 2.647828 0.263119  
Na 2.224532 1.890060 -1.100980  
Cl 2.121174 -0.217019 -2.749472  
Cl -2.121174 0.217019 -2.749472  
Na -2.479292 1.793437 -0.538669  
Cl -2.859520 -0.399277 1.000353  
Na -1.466371 -1.981138 2.762397  
Cl -0.000000 -2.647828 0.263119  
Na -2.224532 -1.890060 -1.100980  
Na -0.000000 -0.000000 0.934961

Na 0.000000 0.000000 -4.214525  
Cl -0.000000 -0.000000 3.641103

#### C7q

Na -1.161800 -3.671731 1.729626  
Cl -3.172377 -3.725083 0.000000  
Na -3.123012 -1.046582 0.000000  
Na -1.161800 -3.671731 -1.729626  
Cl 0.878345 -3.680355 0.000000  
Na 0.567324 -1.038107 0.000000  
Cl -3.333647 1.695061 0.000000  
Na -1.448973 1.643590 -1.806154  
Cl -1.161800 -0.958482 -2.120621  
Na -1.448973 1.643590 1.806154  
Cl -1.161800 -0.958482 2.120621  
Cl 0.734708 1.889215 0.000000  
Na 3.030967 3.147715 0.000000  
Cl 5.334093 4.300215 0.000000  
Na 7.655552 5.215481 0.000000

#### C7r

Cl 0.185629 -3.732678 1.993524  
Na 1.162200 -2.026938 -0.000000  
Na -1.061858 -1.456121 2.374622  
Cl -1.975083 -0.669850 -0.000000  
Na -0.274579 1.494357 0.000000  
Na -1.061858 -1.456121 -2.374622  
Cl 1.211999 0.049373 2.023885  
Na 1.381891 2.299628 3.283637  
Cl -0.410849 3.640655 1.986928  
Na -0.968347 5.201512 0.000000  
Cl -0.410849 3.640655 -1.986928  
Na 1.381891 2.299628 -3.283637  
Cl 1.211999 0.049373 -2.023885  
Cl 0.185629 -3.732678 -1.993524  
Na -0.556988 -5.188895 -0.000000

#### C7s

Cl -2.808094 0.692261 -0.000000  
Na -2.048275 -1.125784 1.732259  
Na -2.048275 -1.125784 -1.732259  
Na -0.291376 1.714593 0.000000  
Cl -1.606087 -3.176895 -0.000000  
Na 1.200739 -2.146453 -0.000000  
Cl 0.528993 -0.343282 -2.025396  
Na 1.370659 1.690426 -3.426283  
Cl 0.528993 3.652497 -1.981562  
Na 0.672512 5.317031 0.000000  
Cl 0.528993 3.652497 1.981562  
Na 1.370659 1.690426 3.426283  
Cl 0.528993 -0.343282 2.025396  
Cl 2.226851 -4.514750 -0.000000  
Na -0.116365 -5.425710 -0.000000

#### C7u

Na -2.485212 -0.996880 -0.035252  
Cl -3.005983 1.806771 -0.020975  
Na -0.921526 1.644675 -1.760750  
Na -1.046270 1.619580 1.857163  
Cl -0.416940 -0.961369 1.826109  
Na 0.330443 -2.983619 0.045521  
Cl 2.918839 -2.718603 0.146743  
Na 5.199270 -1.576239 -0.166034  
Cl 4.424286 0.930539 -0.160427  
Na 3.395814 3.274945 0.033205  
Cl 0.843079 2.589699 0.116416  
Na 1.811744 -0.176182 0.079014  
Cl -0.305108 -0.941293 -1.772737  
Cl -4.951155 -1.707030 -0.105808  
Na -5.522382 0.741164 -0.098185

#### C7w

Na 10.777621 6.245206 0.000000  
Cl 8.692890 4.900226 0.000000  
Na 6.387104 3.703890 0.000000  
Cl 4.119126 2.515741 0.000000  
Na 2.041355 1.066403 0.000000  
Cl -0.069691 -0.511835 0.000000  
Na -2.312355 -0.611514 1.754900  
Na -2.312355 -0.611514 -1.754900  
Cl -3.848969 0.691262 0.000000  
Na -6.307970 -0.290842 0.000000  
Cl -6.563749 -2.784536 0.000000  
Na -4.163081 -3.737645 0.000000  
Cl -2.312355 -3.213263 -1.963140  
Cl -2.312355 -3.213263 1.963140  
Na -0.563343 -3.267042 0.000000

#### C7x

Na -1.872976 -4.266242 0.000160  
Cl -4.402853 -4.586695 -0.000468  
Na -5.716984 -2.424172 -0.000463  
Cl -0.661600 -1.967101 0.000522  
Cl -5.012753 0.130134 -0.000180  
Na -5.623685 2.703949 -0.000383  
Cl -4.043846 4.680607 -0.000309  
Na -1.525096 4.280367 0.000111  
Cl -0.383490 1.946356 0.000330  
Na -2.305326 0.109580 0.000246  
Na 1.391919 -0.153106 0.000598  
Cl 3.960266 -0.476586 0.000586  
Na 6.457780 -0.071429 0.000420  
Cl 9.051485 0.232026 0.000056  
Na 11.501408 -0.115182 -0.001518

#### C8a

Cl 1.984842 -1.984842 1.437249  
Na 0.000000 0.000000 1.720112  
Cl 1.984842 1.984842 1.437249  
Na 2.242484 2.242484 -1.347846  
Cl -0.000000 3.641586 -1.559198  
Na -2.242484 2.242484 -1.347846  
Cl -1.984842 1.984842 1.437249  
Na -0.000000 3.781075 1.106283  
Na 3.781075 -0.000000 1.106283  
Cl 3.641586 -0.000000 -1.559198  
Na 2.242484 -2.242484 -1.347846  
Cl -0.000000 -3.641586 -1.559198  
Na -2.242484 -2.242484 -1.347846  
Cl -3.641586 0.000000 -1.559198  
Na -3.781075 0.000000 1.106283  
Cl -1.984842 -1.984842 1.437249  
Na -0.000000 -3.781075 1.106283

#### C8b

Na 0.019176 1.722181 -3.780286  
Cl -0.000000 1.926951 -0.944001  
Na 2.180542 -0.082844 -1.322603  
Cl 2.015712 -0.021522 -3.935148  
Na -2.180542 0.082844 -1.322603  
Cl 0.000000 -1.926951 -0.944001  
Na 0.000000 0.000000 1.170813  
Cl 2.771326 0.592903 1.242769  
Na 1.330423 2.917444 1.230393  
Cl -0.007028 1.876512 3.346523  
Na 1.955301 -0.039894 3.735048  
Cl 0.007028 -1.876512 3.346523  
Na -1.330423 -2.917444 1.230393  
Cl -2.771326 -0.592903 1.242769  
Na -1.955301 0.039894 3.735048  
Na -0.019176 -1.722181 -3.780286  
Cl -2.015712 0.021522 -3.935148

#### C8c

Na -0.566451 -0.956127 0.000000  
Cl -2.659496 -0.540155 2.016518  
Na -1.508946 1.963166 2.288648  
Cl -0.083463 1.802088 0.000000  
Na 2.010850 0.895293 -2.000703  
Cl 3.735167 0.506640 -0.000000  
Na 3.017467 -2.029114 -0.000000  
Cl 0.300286 1.400403 -4.051309  
Na -1.508946 1.963166 -2.288648  
Cl -2.659496 -0.540155 -2.016518  
Na -4.239477 -1.121817 0.000000  
Cl 1.144982 -1.832295 1.952231  
Na -0.552911 -1.086693 3.856295  
Cl 0.300286 1.400403 4.051309  
Na 2.010850 0.895293 2.000703  
Na -0.552911 -1.086693 -3.856295  
Cl 1.144982 -1.832295 -1.952231

#### C8e

Na -0.715057 0.984056 1.065432  
Cl -0.378448 3.565485 0.268942  
Na 1.867970 2.287296 -0.517163  
Cl 3.999435 1.002643 -1.558195  
Na 2.472120 -1.009579 -2.193843  
Cl 0.067435 0.069590 -1.605040  
Na -0.415698 -2.459193 -0.404493  
Cl -2.899970 -2.585007 -1.403413  
Na -3.696288 -1.514937 0.885472  
Cl -3.518768 1.130650 0.069425  
Na -2.927962 3.729435 0.122327  
Cl 2.377973 -2.509357 0.145149  
Na 4.042014 -0.280732 0.711209  
Cl 2.000473 0.873836 1.997653  
Na -2.558055 -0.092161 -2.173943  
Na 1.335043 -1.640361 2.542122  
Cl -1.261894 -1.552414 2.059829

#### C8f

Cl 0.070286 0.776856 2.133485  
Na -1.686946 -1.380827 2.586645  
Cl 0.061663 -3.318171 2.500607  
Na -0.721293 -3.766168 0.000000  
Cl 0.061663 -3.318171 -2.500607  
Na 1.948316 -1.507927 -2.237922  
Cl 0.070286 0.776856 -2.133485  
Na -1.686946 -1.380827 -2.586645  
Cl -2.568615 -1.590009 0.000000  
Na -1.677264 0.940116 -0.000000  
Cl 1.636115 3.991134 -0.000000  
Na -0.288110 3.692696 -1.795526  
Na 2.013322 1.418202 -0.000000  
Cl 3.194724 -0.921899 0.000000  
Na 1.948316 -1.507927 2.237922  
Na -0.288110 3.692696 1.795526  
Cl -2.242248 3.473972 -0.000000

#### C8g

Na 1.430642 -1.681505 -1.039513  
Cl 4.124979 -1.592101 -0.926982  
Na 3.746993 -0.773115 1.552699  
Cl 1.230701 -1.656551 1.763630  
Na -1.312122 -2.425035 1.622587  
Cl -2.345672 -0.274365 2.670160  
Na 0.127989 0.836914 2.084446  
Cl 2.866051 1.796321 0.963213  
Na 3.715594 0.880900 -1.538467  
Cl 1.104871 0.907490 -2.298832  
Na 1.097221 3.055663 -0.619146  
Cl -1.242040 2.573350 0.429035  
Na -3.648640 1.418463 1.111853  
Cl -1.357389 -2.211485 -1.116472  
Na -1.516619 0.638153 -1.521738

Na -3.908699 -2.011570 -1.849336  
 Cl -4.208321 0.496897 -1.356530

Na 4.283733 -1.510046 -1.791256

C8h

Na 0.387654 -1.146500 2.706207  
 Cl 3.136281 -0.663875 2.642785  
 Na 2.508546 1.640283 3.633767  
 Cl 0.027220 1.773046 2.734653  
 Na -2.660655 0.978989 2.672158  
 Cl -2.932783 1.242602 0.000000  
 Na -0.241141 1.419934 0.000000  
 Cl 3.136281 -0.663875 -2.642785  
 Na 3.157148 -1.243327 -0.000000  
 Cl 0.443923 -1.245680 -0.000000  
 Na 0.387654 -1.146500 -2.706207  
 Cl -2.240434 -1.601940 -2.731453  
 Na -2.660655 0.978989 -2.672158  
 Cl -2.240434 -1.601940 2.731453  
 Na -2.393795 -1.594290 0.000000  
 Na 2.508546 1.640283 -3.633767  
 Cl 0.027220 1.773046 -2.734653

C8j

Na -1.118516 1.557333 -1.784801  
 Cl 0.000000 3.999258 -0.868192  
 Na 1.888177 3.714144 -2.648108  
 Cl 1.630684 1.102010 -2.386874  
 Na 1.118516 -1.557333 -1.784801  
 Cl 1.614588 -1.091755 0.835647  
 Na 1.403856 1.598229 0.410300  
 Cl 1.146086 2.442405 2.931326  
 Na -0.877824 3.588465 1.713022  
 Cl -1.614588 1.091755 0.835647  
 Na 0.000000 0.000000 3.036915  
 Cl -1.146086 -2.442405 2.931326  
 Na 0.877824 -3.588465 1.713022  
 Cl -1.630684 -1.102010 -2.386874  
 Na -1.403856 -1.598229 0.410300  
 Na -1.888177 -3.714144 -2.648108  
 Cl -0.000000 -3.999258 -0.868192

C8m

Na -0.355350 1.668387 1.864644  
 Cl -0.017945 -1.130454 2.102596  
 Na -0.017945 -3.744162 1.868836  
 Cl -1.799837 -4.078141 0.000000  
 Na -0.017945 -3.744162 -1.868836  
 Cl -0.017945 -1.130454 -2.102596  
 Na 1.653052 -0.848209 0.000000  
 Cl 1.773190 1.793824 0.000000  
 Na -0.355350 1.668387 -1.864644  
 Cl -2.385285 1.306430 0.000000  
 Na -1.955859 -1.332136 0.000000  
 Cl -0.649471 4.311960 2.024239  
 Na -2.369429 4.042640 0.000000  
 Cl -0.649471 4.311960 -2.024239  
 Na 1.068084 4.448256 0.000000  
 Cl 2.267914 -3.753098 0.000000  
 Na 4.636237 -4.681225 0.000000

C8i

Na -1.961794 -0.187191 1.089188  
 Cl -4.447098 -0.847549 0.257787  
 Na -2.885296 -2.534643 -0.985992  
 Cl -0.839308 -2.934628 0.753354  
 Na 0.778700 -1.411652 -0.779185  
 Cl 3.281301 -1.957146 0.627253  
 Na 2.884362 0.927027 0.595830  
 Cl 0.585741 0.294489 2.037608  
 Na 0.017409 3.076130 1.932830  
 Cl 1.947925 3.369159 0.213798  
 Na 0.205461 2.066112 -1.410056  
 Cl -2.028820 2.566051 0.281270  
 Na -3.745779 1.175141 -1.254649  
 Cl -1.433694 -0.304482 -1.952175  
 Na 1.217643 -2.344915 2.388456  
 Cl 2.420022 0.297071 -2.095609

C8k

Na -1.235522 0.924632 0.157662  
 Cl -2.573709 3.363837 -0.143470  
 Na -0.265401 4.472685 0.365800  
 Cl 1.170253 2.350628 0.875218  
 Na 2.493898 0.744846 -1.057128  
 Cl 0.136352 -0.486804 -1.739276  
 Na 0.594324 -2.380615 0.256873  
 Cl -1.546492 -3.878323 -0.379816  
 Na -2.873423 -2.350251 1.296328  
 Cl -3.734948 -0.502123 -0.585434  
 Na -4.661392 1.947949 -0.746332  
 Cl 3.018950 -1.334646 1.040770  
 Na 1.550743 0.296268 2.584459  
 Cl -0.826426 -0.876229 2.229777  
 Na -2.026282 -2.007267 -2.172802  
 Cl 4.991968 0.923941 -1.682940  
 Na 5.440227 -0.968681 -0.089593

C8o

Na 0.559600 0.750533 0.000000  
 Cl 0.205441 3.691115 0.000000  
 Na -1.821549 3.121627 1.791488  
 Cl -1.217545 0.498670 2.058568  
 Na -1.217545 -2.149745 1.805067  
 Cl -3.097366 -2.440722 0.000000  
 Na -1.217545 -2.149745 -1.805067  
 Cl 0.905309 -2.475205 0.000000  
 Na 3.880881 -1.501361 0.000000  
 Cl 3.238380 1.062248 0.000000  
 Na 2.844542 3.617371 0.000000  
 Cl -1.217545 0.498670 -2.058568  
 Na -1.821549 3.121627 -1.791488  
 Cl -3.732141 2.899446 0.000000  
 Na -3.249041 0.262685 0.000000  
 Cl 4.706319 -3.916464 0.000000  
 Na 2.365433 -4.791346 0.000000

### 6.3 Structures Anionic Clusters: B3LYP-D3/aug-cc-pVDZ

A1a

Cl 0.000000 -0.000000 2.522373  
 Na 0.000000 0.000000 0.000000  
 XX 0.000000 0.000000 -2.522373

Na -1.661635 -0.959345 0.131225  
 Cl 2.423353 1.399123 -0.774518  
 Cl -0.000000 -2.798247 -0.774518  
 Na 1.661635 -0.959345 0.131225  
 Cl 0.000000 0.000000 2.068823

Na -2.060095 -4.077514 -0.000000  
 Cl -4.063577 -5.522769 -0.000000  
 Cl 4.063577 5.522769 0.000000

A2a

Na -0.000000 2.332996 0.188463  
 Cl 0.000000 -0.000000 1.258113  
 Cl 0.000000 -4.629091 -0.751003  
 Na -0.000000 -2.332996 0.188463  
 Cl 0.000000 4.629091 -0.751003

A3b

Cl 0.000000 1.522469 -0.000000  
 Na -2.367404 2.353699 0.000000  
 Cl -3.943013 0.381122 0.000000  
 Na -1.518598 -0.822323 0.000000  
 Cl 0.369623 -2.531921 -0.000000  
 Na 2.199485 -0.552061 -0.000000  
 Cl 4.664667 -0.005344 -0.000000

A4a

Cl 2.565175 2.565175 -0.393550  
 Na 0.000000 2.493197 0.104962  
 Cl -2.565175 2.565175 -0.393550  
 Na -2.493197 0.000000 0.104962  
 Cl -2.565175 -2.565175 -0.393550  
 Na -0.000000 -2.493197 0.104962  
 Cl 2.565175 -2.565175 -0.393550  
 Na 2.493197 -0.000000 0.104962  
 Cl 0.000000 0.000000 1.302535

A2b

Na 0.000000 0.000000 1.353892  
 Cl -0.000000 2.319104 0.000000  
 Na 0.000000 -0.000000 -1.353892  
 Cl -2.008403 -1.159552 0.000000  
 Cl 2.008403 -1.159552 0.000000

A3c

Cl 2.667563 0.627022 0.000000  
 Na 2.721246 3.133037 0.000000  
 Cl 0.366739 4.002389 0.000000  
 Na 0.000000 1.266614 0.000000  
 Cl -2.048667 -0.305861 0.000000  
 Na -1.647473 -2.840351 0.000000  
 Cl -1.680430 -5.332509 0.000000

A4b

Na -0.528122 1.760764 -1.488818  
 Cl 0.000000 3.742396 0.077063  
 Na 1.135526 1.605795 1.161686  
 Cl -0.000000 -0.000000 2.858909  
 Na -1.135526 -1.605795 1.161686  
 Cl -0.000000 -3.742396 0.077063  
 Cl -1.892527 -0.477559 -1.294843  
 Cl 1.892527 0.477559 -1.294843  
 Na 0.528122 -1.760764 -1.488818

A2c

Cl -0.000000 2.083864 -1.153723  
 Na 0.000000 0.000000 -2.521982  
 Cl -0.000000 -2.083864 -1.153723  
 Na -0.000000 -0.000000 0.855523  
 Cl -0.000000 -0.000000 3.385742

A3d

Na 2.060095 4.077514 0.000000  
 Cl 0.000000 2.526068 0.000000  
 Na 0.000000 0.000000 0.000000  
 Cl -0.000000 -2.526068 -0.000000

A4c

Cl 2.183104 -3.086782 -0.000000  
 Na 0.604929 -1.693377 1.553992

A3a

Cl -2.423353 1.399123 -0.774518  
 Na 0.000000 1.918691 0.131225

Na 0.604929 -1.693377 -1.553992  
Cl -1.675022 -1.852959 0.000000  
Cl 0.604929 0.836479 -2.130185  
Na 0.683425 2.417663 -0.000000  
Na -1.799571 0.780502 0.000000  
Cl 0.604929 0.836479 2.130185  
Cl -1.778577 3.388811 0.000000

#### A4d

Cl 0.000000 2.440551 0.010034  
Na 1.693227 0.977585 -1.341085  
Cl 2.113579 -1.220276 0.010034  
Na -1.693227 0.977585 -1.341085  
Cl -2.113579 -1.220276 0.010034  
Na -0.000000 -1.955170 -1.341085  
Cl 0.000000 0.000000 -3.242874  
Na 0.000000 0.000000 2.002441  
Cl 0.000000 0.000000 4.520359

#### A4e

Na 0.355996 -2.893597 0.000000  
Cl 1.380534 -0.265639 0.000000  
Na -0.794480 -0.235086 1.746076  
Cl -1.743059 1.571727 -0.000000  
Na -0.794480 -0.235086 -1.746076  
Cl -0.794480 -2.740118 -2.347388  
Cl -0.794480 -2.740118 2.347388  
Na 0.910105 2.548299 -0.000000  
Cl 2.160394 4.701805 -0.000000

#### A4f

Cl -2.238011 -1.296989 0.000000  
Na -3.447078 -3.508561 0.000000  
Cl -1.746467 -5.371527 -0.000000  
Na -0.129715 -3.242884 -0.000000  
Cl 1.786839 -1.555498 -0.000000  
Na -0.000000 0.386429 0.000000  
Cl -0.165906 2.960022 0.000000  
Na 1.807071 4.594333 0.000000  
Cl 3.508659 6.409728 -0.000000

#### A4g

Cl 1.333006 -2.659342 -0.000000  
Na 3.851230 -2.790104 -0.000000  
Cl 4.882997 -0.491372 -0.000000  
Na 2.345098 0.249875 -0.000000  
Cl 0.000000 1.238851 0.000000  
Na -0.981008 -1.241329 0.000000  
Cl -3.495491 -0.868829 0.000000  
Na -3.045680 1.791016 0.000000  
Cl -4.124397 4.068691 0.000000

#### A4h

Cl -0.701100 -3.701295 2.053476  
Na 0.367671 -2.153411 0.000000  
Cl 2.052902 -0.191177 0.000000  
Na 0.908423 2.115694 0.000000  
Cl 1.793087 4.753042 0.000000  
Na -1.597683 -4.815974 0.000000  
Cl -0.701100 -3.701295 -2.053476  
Na -0.701100 5.001765 0.000000  
Cl -1.782049 2.744912 0.000000

#### A4i

Na -0.000000 6.808773 -0.225150  
Cl -0.000000 8.991661 0.921948  
Cl -0.000000 4.458543 -1.295781  
Na -0.000000 2.884112 -0.029113  
Cl -0.000000 -0.000000 1.076713  
Na -0.000000 -2.284112 -0.029113  
Cl -0.000000 -4.458543 -1.295781  
Na -0.000000 -6.808773 -0.225150

Cl -0.000000 -8.991661 0.921948

#### A5a

Na 1.637677 -0.000000 -2.285466  
Cl 0.000000 2.078678 -2.647282  
Cl -0.000000 -2.078678 -2.647282  
Na -1.637677 0.000000 -2.285466  
Cl -1.977291 0.000000 0.272799  
Na -0.000000 -2.038039 0.234712  
Cl 1.977291 -0.000000 0.272799  
Na 0.000000 2.038039 0.234712  
Cl 0.000000 2.621781 2.799360  
Na 0.000000 0.000000 2.788248  
Cl -0.000000 -2.621781 2.799360

#### A5b

Cl 2.587507 -0.000000 0.251519  
Na 1.631124 2.358406 -0.376733  
Cl 0.000000 3.338870 -2.163211  
Na -1.631124 2.358406 -0.376733  
Na 1.631124 -2.358406 -0.376733  
Cl -0.000000 -3.338870 -2.163211  
Na -1.631124 -2.358406 -0.376733  
Cl -2.587507 0.000000 0.251519  
Cl 0.000000 -2.654331 1.794258  
Na 0.000000 0.000000 1.869907  
Cl 0.000000 2.654331 1.794258

#### A5c

Cl 2.528754 3.480531 -0.000000  
Na -0.000000 3.038048 0.000000  
Cl -2.528754 3.480531 -0.000000  
Na 2.889355 0.938808 0.000000  
Cl 4.091610 -1.329445 -0.000000  
Na 1.785720 -2.457832 0.000000  
Cl -0.000000 -4.302173 -0.000000  
Na -1.785720 -2.457832 0.000000  
Cl -4.091610 -1.329445 -0.000000  
Na -2.889355 0.938808 0.000000  
Cl 0.000000 0.000000 0.000000

#### A5d

Na -1.444100 -0.901433 2.204763  
Cl 0.717983 -2.034557 3.008864  
Na 1.744362 0.202503 2.045258  
Cl 3.163801 0.933498 -0.000000  
Cl -2.897618 -0.517872 0.000000  
Na -1.444100 -0.901433 -2.204763  
Cl -0.578283 1.679047 -2.436084  
Na -1.443696 1.854379 0.000000  
Cl -0.578283 1.679047 2.436084  
Na 1.744362 0.202503 -2.045258  
Cl 0.717983 -2.034557 -3.008864

#### A5e

Cl 1.212052 0.880849 -2.379082  
Na 2.805712 1.162923 -0.330655  
Cl 1.231631 2.229703 1.411263  
Cl 2.895389 -1.358838 0.505135  
Na 1.060907 -1.599926 -1.524748  
Cl -0.871126 -2.800791 -0.328737  
Na -2.750147 -0.982600 0.032829  
Cl -3.155586 1.157067 -1.404911  
Cl -1.843734 0.030583 2.292524  
Na -0.926367 1.851020 -0.210169  
Na 0.631112 -0.645576 1.884080

#### A5f

Na 0.000000 2.104387 -0.000000  
Cl -1.779249 1.529019 1.897945  
Na 0.000000 0.000000 3.032903

Cl 2.213794 0.776365 1.897945  
Na 1.822453 -1.052193 -0.000000  
Cl -0.434545 -2.305384 1.897945  
Na -1.822453 -1.052193 -0.000000  
Cl -2.213794 0.776365 -1.897945  
Na 0.000000 0.000000 -3.032903  
Cl 0.434545 -2.305384 -1.897945  
Cl 1.779249 1.529019 -1.897945

#### A5g

Na 0.130864 0.555720 1.884283  
Cl 0.195235 -2.229662 1.634003  
Na 1.938449 -1.885934 -0.302991  
Cl 4.144120 -0.494801 -0.378709  
Na 2.382480 1.361869 -0.941326  
Cl 0.844676 2.796718 0.589045  
Cl -2.444190 0.733086 1.693674  
Na -1.775523 1.360974 -0.888953  
Cl 0.356929 -0.230970 -1.655767  
Na -2.093384 -1.506130 0.173221  
Cl -3.473932 -0.500929 -1.833220

#### A5h

Na -0.541678 -0.560397 2.196113  
Cl 0.080763 1.999150 2.023633  
Na 2.046676 2.298810 -0.000000  
Cl 4.494359 2.773416 -0.000000  
Cl -0.541678 -3.128855 2.466841  
Na -1.338435 -3.211021 0.000000  
Cl -0.541678 -3.128855 -2.466841  
Na -0.541678 -0.560397 -2.196113  
Cl 0.080763 1.999150 -2.023633  
Cl -2.313421 -0.511676 0.000000  
Na -1.570779 2.029402 0.000000

#### A5i

Cl -1.038689 1.044980 3.632220  
Na 0.007993 -0.459467 1.822960  
Na -1.038689 2.897122 1.787296  
Cl -1.980698 4.531019 0.000000  
Na -1.038689 2.897122 -1.787296  
Cl -1.038689 1.044980 -3.632220  
Na 0.007993 -0.459467 -1.822960  
Cl 0.604168 1.450832 -0.000000  
Cl 0.016100 -2.438420 0.000000  
Na 1.832619 -4.289482 -0.000000  
Cl 3.585840 -6.012456 -0.000000

#### A5j

Cl 2.794123 3.217235 -0.000000  
Na 1.663535 1.730996 1.790753  
Cl 1.663535 -0.255784 3.483095  
Na 0.202365 -1.547014 1.830086  
Cl -1.117523 -2.949225 0.000000  
Na 0.202365 -1.547014 -1.830086  
Cl 1.663535 -0.255784 -3.483095  
Na 1.663535 1.730996 -1.790753  
Cl -0.258055 0.577204 -0.000000  
Na -2.892207 -0.717295 0.000000  
Cl -5.288881 -0.107609 0.000000

#### A5k

Na 0.000000 2.055095 -0.030436  
Cl 0.000000 0.000000 1.913931  
Na -1.779765 -1.027548 -0.030436  
Cl -0.000000 -2.446951 -1.266264  
Na 1.779765 -1.027548 -0.030436  
Cl 2.119122 1.223476 -1.266264  
Cl -2.119122 1.223476 -1.266264  
Na 0.000000 0.000000 -3.298247  
Cl 0.000000 0.000000 -5.795513  
Na 0.000000 0.000000 4.505604

Cl 0.000000 0.000000 6.958224

A6a

Cl 0.829308 1.393451 3.623401  
Na 0.794962 -0.687007 2.040333  
Cl -1.008696 -2.894600 2.033693  
Na 0.506860 -3.660653 -0.000000  
Cl -1.008696 -2.894600 -2.033693  
Na 0.794962 -0.687007 -2.040333  
Cl 0.829308 1.393451 -3.623401  
Na -0.289126 2.812034 -1.778754  
Cl -0.555417 4.696056 0.000000  
Na -0.289126 2.812034 1.778754  
Cl -0.993237 0.742277 0.000000  
Na -2.137235 -1.618894 -0.000000  
Cl 2.307767 -1.769892 -0.000000

A6b

Cl 2.374352 1.956790 0.377676  
Na 0.000000 2.844098 -0.309245  
Cl -2.374352 1.956790 0.377676  
Cl 0.000000 1.866358 -2.738501  
Na 1.775181 -0.000000 -1.704660  
Na -1.775181 0.000000 -1.704660  
Na 1.914250 0.000000 2.100653  
Cl -0.000000 -1.866358 -2.738501  
Na -0.000000 -2.844098 -0.309245  
Cl -2.374352 -1.956790 0.377676  
Cl 2.374352 -1.956790 0.377676  
Na -1.914250 0.000000 2.100653  
Cl -0.000000 -0.000000 3.854034

A6c

Na 2.051779 0.907469 0.000000  
Cl 2.124153 -1.738985 -0.000000  
Cl -1.544276 4.191389 0.000000  
Cl 1.409036 1.441627 2.569629  
Na -0.956087 2.309408 -1.695858  
Cl -1.209747 0.221995 0.000000  
Na 0.695651 -1.187788 -2.239726  
Cl -1.161652 -2.956490 -2.592543  
Na -1.322110 -2.601569 -0.000000  
Cl -1.161652 -2.956490 2.592543  
Na 0.695651 -1.187788 2.239726  
Na -0.956087 2.309408 1.695858  
Cl 1.409036 1.441627 -2.569629

A6d

Cl -0.178697 0.983723 2.554465  
Na 0.023751 -1.606458 2.305270  
Cl -1.454661 -1.841817 -0.000000  
Na -1.503238 0.902123 0.000000  
Cl -1.710464 3.575947 0.000000  
Na 0.431822 3.393970 1.650252  
Cl 2.240137 4.293061 0.000000  
Na 0.431822 3.393970 -1.650252  
Cl -0.178697 0.983723 -2.554465  
Na 0.023751 -1.606458 -2.305270  
Cl 0.800225 -4.075358 -2.495496  
Cl 0.800225 -4.075358 2.495496  
Na 0.100530 -4.235936 -0.000000

A6e

Cl 1.855279 0.233561 2.013680  
Na 1.770401 -1.960866 0.183643  
Cl 3.835467 -1.229112 -1.281589  
Na 2.247267 0.865648 -1.287078  
Cl 0.855989 3.174253 -1.089372  
Na -1.869713 1.415553 -0.988591  
Cl -0.038681 -0.551036 -1.384451  
Na -0.681518 -0.595670 2.012866  
Cl -0.710088 -3.124800 1.198668

Na -2.121546 -2.112218 -0.886818  
Cl -3.871100 -0.309749 -1.513938  
Cl -1.892388 1.745985 1.775975  
Na 0.601827 2.481669 1.400291

A6f

Cl 0.000000 0.000000 3.148724  
Na 1.806571 1.043024 1.405591  
Cl 2.375030 1.371224 -1.859904  
Na 0.000000 2.417462 -1.605329  
Cl -2.375030 1.371224 -1.859904  
Na -2.093583 -1.208731 -1.605329  
Cl -0.000000 -2.742448 -1.859904  
Na -0.000000 -2.086049 1.405591  
Cl 0.000000 3.065648 0.939571  
Na -1.806571 1.043024 1.405591  
Cl -2.654929 -1.532824 0.939571  
Na 2.093583 -1.208731 -1.605329  
Cl 2.654929 -1.532824 0.939571

A6g

Cl 2.709936 1.564582 1.552476  
Na 0.000000 2.374487 1.194234  
Cl -2.709936 1.564582 1.552476  
Na -2.056366 1.187244 -1.194234  
Cl 0.000000 3.129165 -1.552476  
Na 2.056366 1.187244 -1.194234  
Cl 2.709936 -1.564582 -1.552476  
Na 2.056366 -1.187244 1.194234  
Cl -0.000000 -3.129165 1.552476  
Na -0.000000 -2.374487 -1.194234  
Cl 0.000000 0.000000 0.000000  
Na -2.056366 -1.187244 1.194234  
Cl -2.709936 -1.564582 -1.552476

A6h

Cl -0.056372 3.889866 2.259559  
Na 1.543133 1.849464 2.024499  
Cl 2.769570 2.366284 -0.293222  
Na 0.000000 3.188833 -0.274193  
Na -1.554135 -0.454291 -1.655947  
Cl 0.000000 0.000000 0.897036  
Na -1.543133 -1.849464 2.024499  
Cl -2.769570 -2.366284 -0.293222  
Cl 0.056372 -3.889866 2.259559  
Na -0.000000 -3.188833 -0.274193  
Cl 0.746889 -1.937410 -2.475911  
Cl -0.746889 1.937410 -2.475911  
Na 1.554135 0.454291 -1.655947

A6i

Na -0.492723 1.651369 -0.609355  
Cl -1.926531 -0.277297 1.875860  
Na 0.692845 -0.229099 1.901197  
Cl 2.991917 -1.493104 1.555734  
Na 2.622171 -1.562547 -1.139023  
Cl 0.064875 -1.033047 -1.316487  
Na -3.971075 0.668437 0.201008  
Cl -2.854540 2.654750 -1.024919  
Cl 1.557399 2.190603 1.045595  
Na 3.772588 0.915250 0.441814  
Cl 4.552789 0.022514 -1.865889  
Cl -4.688836 -1.722828 -0.638715  
Na -2.155645 -1.971323 -0.225644

A6j

Na -1.789448 -2.886540 -0.000000  
Cl -1.966239 -0.309265 -0.000000  
Cl -0.180585 -3.369166 2.053561  
Na 1.502439 -3.523894 -0.000000  
Cl 2.487254 -1.140682 -0.000000  
Cl -0.180585 -3.369166 -2.053561

Na 0.494307 -0.483595 -1.761992  
Cl 0.494307 2.083492 -2.145877  
Na 1.032835 3.572469 0.000000  
Cl 0.494307 2.083492 2.145877  
Na 0.494307 -0.483595 1.761992  
Cl -1.229130 4.958832 0.000000  
Na -1.609765 2.356234 0.000000

A6k

Cl 2.692540 -0.539175 0.000000  
Na 2.035457 2.061371 0.000000  
Cl 0.559667 2.241149 2.133939  
Na -1.661350 2.608978 0.000000  
Cl -3.676287 4.119960 0.000000  
Na 1.963073 -3.026257 0.000000  
Cl 0.283436 -3.190244 2.054807  
Na -1.410948 -2.944555 0.000000  
Cl 0.283436 -3.190244 -2.054807  
Na 0.283436 -0.367569 -1.943074  
Cl 0.559667 2.241149 -2.133939  
Na 0.283436 -0.367569 1.943074  
Cl -1.668588 -0.365441 0.000000

A6l

Cl 1.385478 -2.947611 1.226039  
Na -0.178647 -0.742727 1.749507  
Cl -2.227226 0.947483 2.074081  
Na -3.321253 -0.137207 -0.237017  
Cl -5.316116 -1.341663 -1.142378  
Na -0.408622 2.493995 0.879541  
Cl -0.660920 -0.300409 -1.085310  
Cl 0.574899 3.718283 -1.185189  
Na 1.564770 1.335752 -1.476997  
Cl 3.183905 -0.879174 -1.829027  
Na 0.957106 -2.325909 -1.341211  
Cl 1.891855 1.064113 1.685639  
Na 3.191931 -1.027303 0.822037

A6m

Na -3.707717 -1.021216 -0.058853  
Cl -2.276695 -0.894025 2.173657  
Cl -3.628681 1.534821 -0.732901  
Cl -1.935333 -2.032495 -1.612376  
Na -1.034182 0.813130 -1.700791  
Na -0.127011 -1.840538 0.422550  
Na -2.112237 1.644888 1.481959  
Cl 1.400142 -0.254525 -1.791817  
Na 2.279432 1.267084 0.496549  
Cl 2.245620 -1.826762 1.556252  
Cl 0.023300 2.628739 0.453693  
Cl 4.860710 1.046780 -0.082281  
Na 3.636798 -1.176353 -0.586128

A6n

Na -2.211926 -2.545107 0.000000  
Cl -0.552555 -2.931565 2.019266  
Na 1.283508 -3.033779 0.000000  
Cl 3.386821 -1.587618 0.000000  
Na 2.561436 0.879981 0.000000  
Cl 1.042914 1.792684 -1.984580  
Na -0.552555 -0.228438 -2.100921  
Cl -0.552555 -2.931565 -2.019266  
Cl -2.240712 0.078648 0.000000  
Na -0.552555 -0.228438 2.100921  
Cl 1.042914 1.792684 1.984580  
Cl -2.082737 5.120447 0.000000  
Na -0.596047 3.094582 0.000000

A6o

Cl -0.176069 1.094262 2.454198  
Na -0.176069 3.596460 1.624896  
Cl 1.406720 4.866601 -0.000000

Na -0.176069 3.596460 -1.624896  
Cl -0.176069 1.094262 -2.454198  
Na 0.868568 -1.128723 -1.703179  
Cl 2.431100 -2.442361 0.000000  
Na 0.868568 -1.128723 1.703179  
Cl -2.341421 3.345594 -0.000000  
Na -1.783238 0.743233 -0.000000  
Cl -1.169989 -1.938293 0.000000  
Na 0.384057 -4.395054 0.000000  
Cl 0.034905 -6.850667 0.000000

#### A6p

Cl 1.721840 -4.068644 0.000000  
Na 1.371541 -1.491282 0.000000  
Cl 1.578279 1.714624 0.000000  
Na 2.926951 3.925177 0.000000  
Cl 3.945318 6.157481 0.000000  
Na -0.543502 1.383925 1.696533  
Cl -0.543502 -1.172606 1.955728  
Cl -2.517993 1.838444 0.000000  
Na -2.635409 -1.023922 0.000000  
Cl -3.446894 -3.505482 0.000000  
Na -0.875196 -3.855147 0.000000  
Cl -0.543502 -1.172606 -1.955728  
Na -0.543502 1.383925 -1.696533

#### A6q

Cl 0.413709 4.608805 2.504050  
Na 0.075344 2.189989 3.193563  
Cl -0.297565 -0.144942 4.154617  
Na -0.473767 -1.048996 1.774871  
Cl -0.116435 1.088144 0.000000  
Na 0.075344 2.189989 -3.193563  
Cl -0.297565 -0.144942 -4.154617  
Na -0.473767 -1.048996 -1.774871  
Cl -0.869042 -2.954088 -0.000000  
Na 0.106371 -5.373334 -0.000000  
Cl 0.997391 -7.660780 -0.000000  
Cl 0.413709 4.608805 -2.504050  
Na 0.313068 4.017072 0.000000

#### A6r

Cl -0.144826 4.013911 -0.151992  
Na -1.590325 1.931421 0.288228  
Na 1.797979 2.285663 -0.261508  
Cl 4.173459 1.331252 -0.722448  
Na 2.497604 -1.716395 -0.139459  
Cl 0.922572 -2.878339 -1.890390  
Na -0.952176 -1.352765 -1.073572  
Cl -3.167052 0.156831 -0.933316  
Na -5.437392 -0.516330 0.126848  
Cl -7.592819 -0.959277 1.222446  
Cl 0.446447 0.144323 0.719603  
Cl 4.398899 -2.263473 1.650641  
Na 5.173077 0.071236 1.222440

#### A7a

Na -2.042085 0.000000 0.963601  
Cl -2.101381 2.720224 0.963010  
Na -0.000000 2.483175 2.504480  
Cl 2.101381 2.720224 0.963010  
Na 2.042085 -0.000000 0.963601  
Cl 2.101381 -2.720224 0.963010  
Na -0.000000 -2.483175 2.504480  
Cl -2.101381 -2.720224 0.963010  
Na 0.000000 -2.747057 -1.037245  
Cl 0.000000 0.000000 -0.768909  
Na 0.000000 2.747057 -1.037245  
Cl 0.000000 -2.609499 -3.669225  
Cl -0.000000 0.000000 3.375510  
Cl 0.000000 2.609499 -3.669225  
Na 0.000000 0.000000 -3.501967

#### A7b

Na 2.402048 -1.753713 -0.065906  
Cl 0.447017 -3.495197 -0.870673  
Cl 1.286991 -1.137427 2.587787  
Na 0.439029 1.293431 1.794212  
Cl 1.456135 3.541710 0.161981  
Na -0.922514 2.522359 -0.887715  
Cl -2.789919 0.982833 -2.241855  
Na -3.406623 0.467830 0.294269  
Cl -2.069836 2.254052 1.628115  
Cl 0.549145 0.199638 -0.844279  
Cl -3.057018 -2.098701 0.469601  
Na -1.357087 -1.474193 -1.705155  
Na -0.608415 -2.486624 1.361724  
Na 2.905562 1.619287 -0.898104  
Cl 4.532072 -0.368799 -0.821657

#### A7c

Na -0.000000 1.989604 1.628490  
Cl -0.000000 2.604068 4.184264  
Na -0.000000 0.000000 4.206563  
Cl -0.000000 -2.604068 4.184264  
Na -0.000000 -1.989604 1.628490  
Cl 0.000000 -2.221755 -1.174103  
Na 0.000000 -1.701855 -3.718388  
Cl 2.040657 -0.000000 -3.885297  
Na 0.000000 1.701855 -3.718388  
Cl -2.040657 0.000000 -3.885297  
Na -1.846869 0.000000 -1.057531  
Cl -1.971824 0.000000 1.550760  
Cl 0.000000 2.221755 -1.174103  
Na 1.846869 -0.000000 -1.057531  
Cl 1.971824 -0.000000 1.550760

#### A7d

Na -1.923174 -0.873275 1.895218  
Cl -3.653645 0.003079 -0.000000  
Na -1.923174 -0.873275 -1.895218  
Cl 0.026214 -1.285090 0.000000  
Cl -0.970257 -1.563618 4.203746  
Na 0.888008 -0.004182 3.282396  
Cl 3.174124 0.084921 2.009735  
Na 1.435550 1.391821 0.000000  
Cl -0.399849 2.059062 -2.046752  
Na -2.014471 2.073563 0.000000  
Cl -0.399849 2.059062 2.046752  
Na 2.679229 -1.523034 0.000000  
Cl 3.174124 0.084921 -2.009735  
Cl -0.970257 -1.563618 -4.203746  
Na 0.888008 -0.004182 -3.282396

#### A7e

Na 0.329512 -1.596971 1.999030  
Cl -1.988140 -0.319090 2.047347  
Na -1.985338 -2.036681 -0.400046  
Cl 2.033399 0.316189 2.418030  
Na 3.119438 0.744146 -0.030406  
Cl 4.084169 -1.268302 -1.415583  
Na 1.724970 -2.260825 -1.323750  
Cl 0.000847 -0.184329 -1.203489  
Na -0.044991 2.408152 -1.795863  
Cl 2.037923 3.133026 -0.429439  
Cl 0.098717 -3.653241 0.293340  
Cl -1.984667 3.146540 -0.156792  
Na -0.002689 1.822848 1.372410  
Na -3.263683 0.858464 -0.037764  
Cl -4.202802 -1.131408 -1.413398

#### A7f

Na -1.560371 2.141649 -0.847372  
Cl -4.000800 1.063931 -0.369400

Na -3.274715 -1.263387 -1.169293  
Cl -2.487391 -2.753323 0.852262  
Na -1.758735 -0.139621 1.663331  
Cl -1.028926 2.426600 1.856082  
Na 1.464965 2.077721 1.038935  
Cl 3.874970 1.089278 0.329028  
Na 1.866151 0.215534 -1.712520  
Cl 2.556792 -2.544424 -1.186750  
Na 3.293854 -1.323169 1.020314  
Cl 0.888771 -0.942950 2.017554  
Na 0.065941 -2.492992 -0.090416  
Cl -0.801066 -0.589634 -1.844575  
Cl 0.934827 2.757988 -1.591422

#### A7g

Na -2.591198 0.000000 0.251550  
Cl -1.931030 1.925777 1.924251  
Cl -1.931030 -1.925777 1.924251  
Na 0.000000 -3.399515 0.886826  
Cl 0.000000 -4.263897 -1.558072  
Na 0.000000 -1.844594 -2.430714  
Cl 1.954305 -0.000000 -2.310483  
Na 2.591198 -0.000000 0.251550  
Cl 1.931030 -1.925777 1.924251  
Cl -1.954305 0.000000 -2.310483  
Cl 1.931030 1.925777 1.924251  
Na 0.000000 3.399515 0.886826  
Na -0.000000 0.000000 2.646655  
Na 0.000000 1.844594 -2.430714  
Cl 0.000000 4.263897 -1.558072

#### A7h

Na 1.924557 -1.870978 0.892409  
Cl 4.409784 -1.261763 1.287245  
Na 3.792221 0.796172 -0.182467  
Cl 2.894034 3.224361 -0.171093  
Na 0.674306 1.957811 -0.759423  
Cl 0.019348 0.076203 1.308193  
Na -1.824218 1.824763 1.917170  
Cl -3.858870 0.130194 1.704977  
Na -2.038326 -1.781001 0.847472  
Cl -2.743941 -1.372497 -1.906619  
Na -0.164869 -1.844684 -1.860945  
Cl 1.888271 -0.265143 -1.972460  
Cl -0.075925 -3.552079 0.212352  
Cl -1.881512 3.030051 -0.463581  
Na -3.370053 0.903499 -0.852691

#### A7i

Na 0.000000 2.361998 -1.138976  
Cl -2.124746 1.226723 -2.671570  
Cl 2.124746 1.226723 -2.671570  
Cl 0.000000 0.000000 0.106057  
Na 0.000000 0.000000 -3.612345  
Cl -0.000000 -2.453445 -2.671570  
Na 2.045551 -1.180999 -1.138976  
Cl 2.804730 -1.619312 1.440418  
Na 1.659209 0.957945 2.123483  
Cl 0.000000 0.000000 4.013695  
Na -1.659209 0.957945 2.123483  
Cl -2.804730 -1.619312 1.440418  
Na -2.045551 -1.180999 -1.138976  
Cl 0.000000 3.238624 1.440418  
Na -0.000000 -1.915890 2.123483

#### A7j

Cl 2.141126 -2.994212 0.000000  
Na -0.404808 -3.571517 0.000000  
Cl -1.085952 -2.647731 2.352402  
Na 1.720059 -0.896456 1.658245  
Na 1.720059 -0.896456 -1.658245  
Cl -1.085952 -2.647731 -2.352402

Na -2.052688 -0.292559 -1.933455  
Na -2.052688 -0.292559 1.933455  
Cl 0.084815 1.234456 2.045222  
Cl 0.084815 1.234456 -2.045222  
Na 1.772108 2.604130 0.000000  
Cl 3.412313 0.551994 0.000000  
Cl -3.430310 0.920313 0.000000  
Na -1.322584 2.705746 0.000000  
Cl 0.280671 4.762360 0.000000

#### A7k

Na 0.713100 3.980366 -0.000000  
Cl 1.684653 1.583430 -0.000000  
Cl -0.979430 3.818451 2.056883  
Cl -0.979430 3.818451 -2.056883  
Na -2.526589 3.158232 -0.000000  
Cl -2.417592 0.563098 -0.000000  
Na -0.192081 1.051413 1.898785  
Cl -0.192081 -1.449836 2.661628  
Na 1.568263 -3.119407 1.639797  
Cl -0.229945 -4.348674 0.000000  
Na -1.394002 -1.954973 0.000000  
Cl -0.192081 -1.449836 -2.661628  
Na -0.192081 1.051413 -1.898785  
Cl 3.600399 -3.212966 0.000000  
Na 1.568263 -3.119407 -1.639797

#### A7l

Na 2.795874 1.335592 0.486992  
Cl 0.941467 -3.454984 -0.602540  
Na -1.351177 -2.356254 0.425663  
Cl -3.918133 -2.398448 0.290236  
Na -3.788911 0.135494 -0.279688  
Cl -3.607074 2.269351 1.174143  
Na -1.062039 1.838085 1.346218  
Cl 0.952756 3.367455 0.451260  
Na 0.274777 2.281149 -1.844068  
Cl -1.515964 0.304997 -1.820279  
Na 0.760255 -1.116251 -1.842310  
Cl 2.450744 0.838245 -2.242643  
Cl 0.290388 -0.463229 1.495862  
Cl 4.371817 -0.471052 1.570806  
Na 2.423762 -2.105971 1.217524

#### A7m

Cl -2.608076 2.621466 0.000000  
Na -1.823057 -0.045090 0.000000  
Na -0.603676 3.147752 1.673064  
Cl 1.152422 4.257639 0.000000  
Na 2.103610 1.484495 0.000000  
Cl -1.778306 -1.986687 1.978273  
Na -1.565486 -3.669323 0.000000  
Cl 0.995184 -4.077819 0.000000  
Na 1.061071 -1.804109 -1.698082  
Cl 3.104035 -0.963895 0.000000  
Na 1.061071 -1.804109 1.698082  
Cl 0.576275 0.920020 2.202193  
Cl -1.778306 -1.986687 -1.978273  
Na -0.603676 3.147752 -1.673064  
Cl 0.576275 0.920020 -2.202193

#### A7n

Na 0.425441 -3.612485 1.632609  
Cl 1.531632 -1.621891 0.000000  
Cl -1.374074 -1.875652 2.440799  
Na -1.952882 -0.997197 -0.000000  
Cl -0.947518 1.508405 -0.000000  
Cl -1.374074 -1.875652 -2.440799  
Na 0.532169 0.125061 2.039460  
Cl 1.112791 2.186916 3.499450  
Na -0.113763 3.658138 1.774704  
Cl -0.387234 5.522755 -0.000000

Na -0.113763 3.658138 -1.774704  
Cl 1.112791 2.186916 -3.499450  
Na 0.532169 0.125061 -2.039460  
Na 0.425441 -3.612485 -1.632609  
Cl 0.497278 -5.607474 0.000000

#### A7o

Na -1.566344 2.494507 1.616319  
Cl -3.583567 1.643933 0.000000  
Na -2.232367 -0.590673 -0.000000  
Cl -0.437533 -2.764213 -0.000000  
Cl -1.566344 0.167914 3.000502  
Na 0.559115 -0.945215 2.085729  
Cl 3.118230 -1.923003 -2.026697  
Na 0.559115 -0.945215 -2.085729  
Cl -1.566344 0.167914 -3.000502  
Na -1.566344 2.494507 -1.616319  
Cl -0.756000 4.427761 0.000000  
Na 2.135216 -3.332963 0.000000  
Cl 3.118230 -1.923003 2.026697  
Cl 0.899419 0.847227 0.000000  
Na 3.307651 -0.171037 0.000000

#### A7p

Na -1.566344 2.494507 1.616319  
Cl -3.583567 1.643933 -0.000000  
Na -2.232367 -0.590673 -0.000000  
Cl -0.437533 -2.764213 0.000000  
Cl -1.566344 0.167914 3.000502  
Na 0.559115 -0.945215 2.085729  
Cl 3.118230 -1.923003 -2.026697  
Na 0.559115 -0.945215 -2.085729  
Cl -1.566344 0.167914 -3.000502  
Na -1.566344 2.494507 -1.616319  
Cl -0.756000 4.427761 -0.000000  
Na 2.135216 -3.332963 0.000000  
Cl 3.118230 -1.923003 2.026697  
Cl 0.899419 0.847227 -0.000000  
Na 3.307651 -0.171037 0.000000

#### A7q

Na 3.941909 -0.905760 -0.888861  
Cl 2.378206 0.795320 -2.022837  
Cl 4.049446 0.115591 1.576351  
Na 2.068923 -1.641098 1.743101  
Cl -0.018437 -0.136169 1.365452  
Cl 2.257458 -2.937789 -0.551060  
Na 2.071151 1.961251 0.434805  
Cl 0.314015 3.877240 0.443235  
Na -1.571410 2.214701 -0.277315  
Cl -3.881061 1.274450 0.863876  
Na -3.857877 -0.657813 -1.033425  
Cl -1.829020 0.309824 -2.359854  
Na 0.329650 -0.956087 -1.447014  
Na -2.516754 -0.818666 1.805213  
Cl -3.571872 -2.778573 0.467099

#### A7r

Na -3.609054 -1.302481 0.611824  
Cl -1.870171 -3.240247 0.350848  
Cl -1.808418 0.289343 1.672212  
Na 0.375272 1.945119 1.270322  
Cl -1.071027 4.039950 0.603482  
Na -2.224502 2.065236 -0.686248  
Cl 0.098767 1.111431 -1.864120  
Na 2.476230 0.112695 -1.999412  
Cl 1.739145 -2.125453 -0.638782  
Cl -3.688677 -0.057233 -1.691864  
Cl 1.951149 0.093613 2.592633  
Na 0.095388 -1.681285 1.562279  
Na -1.110904 -1.261917 -1.445641  
Na 3.640993 -0.766507 0.807083

Cl 4.879959 0.463921 -1.102191

#### A7s

Na -0.360707 -0.528417 -1.554907  
Cl 0.094686 -2.980180 -0.432863  
Na 2.402779 -2.126181 0.560256  
Cl 2.795100 0.114121 2.049896  
Na 0.734397 1.732275 1.686206  
Cl -0.269956 4.112723 1.152303  
Na -0.899642 2.788147 -0.979201  
Cl -2.535521 1.081587 -2.296277  
Na -3.757913 0.107191 -0.154721  
Cl -1.416484 0.203661 1.200412  
Na -1.929772 -2.424142 1.160044  
Cl -4.488163 -2.235924 0.705026  
Cl 1.427035 1.447894 -1.511714  
Cl 4.471025 -1.822837 -1.022640  
Na 3.690743 0.573151 -0.476805

#### A7t

Na 3.139424 -0.127709 -0.967866  
Cl 2.008177 -2.414581 0.245392  
Na -0.248963 -0.948639 -1.865825  
Cl 0.496494 0.634396 1.176156  
Na -2.067633 1.607157 1.338157  
Cl -1.417345 4.042877 0.599537  
Na -0.084268 2.437788 -1.014625  
Cl -2.382442 0.769399 -1.492774  
Na -3.520114 -1.305236 -0.370334  
Cl -2.974152 -0.872207 2.174939  
Cl 1.479158 0.896708 -2.721205  
Cl -1.713567 -3.065727 -1.050036  
Na -0.567275 -1.961021 1.170633  
Cl 4.875188 0.504888 0.887620  
Na 2.774675 -0.468501 1.988617

#### A7u

Na 1.042348 2.708479 -1.420061  
Cl 2.701386 1.008777 -2.405683  
Cl 1.799055 2.916029 1.059009  
Na -0.148040 1.159217 1.855894  
Cl -2.728193 0.637284 2.101329  
Na -2.733331 -1.370201 0.046111  
Cl -0.696440 -2.914024 -0.532294  
Na 1.269092 -2.706929 1.206014  
Cl 1.657605 -0.599224 2.677486  
Cl -1.028027 1.104249 -1.250829  
Cl 3.177789 -2.159574 -0.492889  
Na 0.988554 -1.077766 -1.836131  
Na 3.121782 0.428016 0.432807  
Cl -4.909981 -0.429231 -1.158797  
Na -3.498976 1.532560 -0.280510

#### A7v

Na -1.042347 -2.708479 -1.420062  
Cl -2.701386 -1.008776 -2.405683  
Cl -1.799055 -2.916029 1.059009  
Na 0.148040 -1.159217 1.855894  
Cl 2.728193 -0.637284 2.101329  
Na 2.733332 1.370201 0.046111  
Cl 0.696440 2.914024 -0.532293  
Na -1.269092 2.706929 1.206015  
Cl -1.657606 0.599224 2.677486  
Cl 1.028026 -1.104249 -1.250829  
Cl -3.177789 2.159574 -0.492889  
Na -0.988554 1.077766 -1.836131  
Na -3.121782 -0.428016 0.432806  
Cl 4.909982 0.429231 -1.158797  
Na 3.498976 -1.532560 -0.280510

#### A7w

Na -2.611131 -1.880405 0.000000

Cl -2.481453 -0.895671 2.502903  
Na -2.481453 1.606128 -1.692533  
Cl -0.410240 1.155360 0.000000  
Na 2.230646 1.578270 0.000000  
Cl 4.795991 2.141963 0.000000  
Na 4.309996 -0.447709 0.000000  
Cl 2.654014 -0.491729 2.095959  
Na 0.226618 -1.355956 1.851780  
Cl -2.481453 -0.895671 -2.502903  
Cl -0.349076 -3.212513 0.000000  
Na 0.226618 -1.355956 -1.851780  
Cl 2.654014 -0.491729 -2.095959  
Na -2.481453 1.606128 1.692533  
Cl -4.006401 2.851432 0.000000

#### A7x

Na -2.611131 -1.880405 0.000000  
Cl -2.481453 -0.895671 2.502903  
Na -2.481453 1.606128 -1.692533  
Cl -0.410240 1.155360 0.000000  
Na 2.230646 1.578270 0.000000  
Cl 4.795991 2.141963 0.000000  
Na 4.309996 -0.447709 0.000000  
Cl 2.654014 -0.491729 2.095959  
Na 0.226618 -1.355956 1.851780  
Cl -2.481453 -0.895671 -2.502903  
Cl -0.349076 -3.212513 0.000000  
Na 0.226618 -1.355956 -1.851780  
Cl 2.654014 -0.491729 -2.095959  
Na -2.481453 1.606128 1.692533  
Cl -4.006401 2.851432 0.000000

#### A7y

Na 2.687572 -1.582817 0.493941  
Cl 2.377093 -1.394622 -2.157718  
Na -0.112711 -2.324456 -1.356679  
Cl -2.577629 -2.204323 -2.073035  
Na -3.300096 -0.284518 -0.492320  
Cl -2.574371 0.108552 2.460556  
Na -0.138125 -0.872457 2.263232  
Cl 2.572261 0.118859 2.571675  
Na 2.191227 2.101307 0.918154  
Cl -0.022072 0.837298 -0.138337  
Na 1.639918 1.149953 -2.252980  
Cl 3.001612 3.156212 -1.282558  
Cl 0.664962 -3.142633 1.092427  
Cl -3.988506 2.261504 -0.798203  
Na -2.122962 2.213497 0.929226

#### A7z

Na -0.000000 2.875449 -0.479639  
Cl 0.000000 1.774497 1.955620  
Cl -2.332314 1.948180 -1.217011  
Na -1.906245 0.000000 -2.987711  
Cl -0.000000 -0.000000 -4.726877  
Na 1.906245 -0.000000 -2.987711  
Cl 2.332314 -1.948180 -1.217011  
Na -0.000000 -2.875449 -0.479639  
Cl -2.332314 -1.948180 -1.217011  
Cl 2.332314 1.948180 -1.217011  
Cl -0.000000 -1.774497 1.955620  
Na 1.887834 -0.000000 0.694131  
Na -1.887834 0.000000 0.694131  
Na 0.000000 0.000000 4.119493  
Cl 0.000000 0.000000 6.606998

#### A7za

Cl 2.355738 -0.074994 -0.000000  
Na 0.438528 0.540596 1.933241  
Cl 0.438528 -2.098936 2.604809  
Na 0.951397 -2.544115 0.000000  
Cl 0.438528 -2.098936 -2.604809

Na -2.143681 -1.955477 -2.091728  
Cl -2.364001 -3.457100 0.000000  
Na -2.143681 -1.955477 2.091728  
Cl -2.378163 0.661470 2.316331  
Na -2.340939 1.863950 0.000000  
Cl 0.165210 2.721203 -0.000000  
Na 0.438528 0.540596 -1.933241  
Cl -2.378163 0.661470 -2.316331  
Na 2.998808 2.632824 -0.000000  
Cl 4.887701 4.253359 -0.000000

#### A7zb

Na -2.059473 -1.420456 0.000000  
Cl -1.622996 -0.252189 2.430696  
Na 1.042073 -0.258938 2.068009  
Cl 3.418382 0.690937 2.569527  
Na 3.296614 1.132963 0.000000  
Cl 3.418382 0.690937 -2.569527  
Na 1.042073 -0.258938 -2.068009  
Cl -1.622996 -0.252189 -2.430696  
Na -1.622996 2.256766 -1.629270  
Cl 0.546887 1.922723 0.000000  
Na -1.622996 2.256766 1.629270  
Cl -3.185015 3.521716 0.000000  
Cl 1.408453 -1.988737 0.000000  
Cl -2.444011 -4.068465 0.000000  
Na 0.052848 -4.117295 0.000000

#### A8a

Cl -2.600223 2.600223 1.516962  
Na -0.000000 2.908772 1.214048  
Cl -0.000000 3.677270 -1.516962  
Na -2.056813 2.056813 -1.214048  
Cl -2.600223 -2.600223 1.516962  
Na -2.056813 -2.056813 -1.214048  
Cl 0.000000 0.000000 0.000000  
Na 2.056813 2.056813 -1.214048  
Cl 2.600223 2.600223 1.516962  
Na 2.908772 -0.000000 1.214048  
Cl 3.677270 -0.000000 -1.516962  
Na 2.056813 -2.056813 -1.214048  
Cl -0.000000 -3.677270 -1.516962  
Na -0.000000 -2.908772 1.214048  
Cl 2.600223 -2.600223 1.516962  
Cl -3.677270 0.000000 -1.516962  
Na -2.908772 0.000000 1.214048

#### A8b

Cl 0.000000 0.000000 0.000000  
Na 0.000000 2.596392 0.827393  
Cl -0.617070 1.953373 3.382182  
Na 1.606866 0.471686 2.900067  
Cl -2.954334 -1.858778 1.106224  
Na -0.000000 -2.596392 0.827393  
Cl 1.858778 -2.954334 -1.106224  
Na 2.596392 -0.000000 -0.827393  
Cl 1.953373 0.617070 -3.382182  
Na 0.471686 -1.606866 -2.900067  
Cl -1.953373 -0.617070 -3.382182  
Na -0.471686 1.606866 -2.900067  
Cl -1.858778 2.954334 -1.106224  
Na -2.596392 0.000000 -0.827393  
Cl 2.954334 1.858778 1.106224  
Cl 0.617070 -1.953373 3.382182  
Na -1.606866 -0.471686 2.900067

#### A8c

Cl -0.102240 0.096509 -0.447850  
Na 2.640494 1.563596 -0.941511  
Cl 3.601594 -1.046497 -1.634595  
Na 1.145103 -1.982168 -1.582553  
Cl -1.185536 -3.186757 -1.901324

Na -2.572880 -0.829671 -1.490507  
Cl -3.488190 -1.616480 1.090026  
Na -3.170166 0.986139 1.222516  
Cl -1.292114 2.436320 2.281294  
Na -0.927086 2.770786 -0.733887  
Cl 1.301377 3.606019 -1.824066  
Na -1.146891 -2.757503 0.795734  
Cl 1.292063 -2.579736 1.786464  
Na 0.655216 0.628321 2.108278  
Cl -3.422894 1.727119 -1.337350  
Cl 3.243854 1.166897 1.746762  
Na 3.456707 -1.312018 0.993827

#### A8d

Cl -0.273622 1.709307 2.763064  
Na -2.645747 0.328413 2.114169  
Cl -2.460474 -1.779850 3.616285  
Na -0.048583 -1.551818 2.714122  
Cl 2.666077 -1.414683 2.675617  
Na 2.489198 -1.116051 0.000000  
Cl -0.272168 -0.996829 0.000000  
Na -2.645747 0.328413 -2.114169  
Cl -3.234005 1.779422 -0.000000  
Na -0.414775 1.843193 -0.000000  
Cl -0.273622 1.709307 -2.763064  
Na 2.251365 1.193637 -2.506151  
Cl 2.666077 -1.414683 -2.675617  
Na 2.251365 1.193637 2.506151  
Cl 2.873186 1.755879 -0.000000  
Cl -2.460474 -1.779850 -3.616285  
Na -0.048583 -1.551818 -2.714122

#### A8e

Cl -0.322860 0.476092 0.000000  
Na -1.573340 2.835670 0.000000  
Cl 0.805112 4.011921 0.000000  
Na 1.993522 2.132346 1.670580  
Cl 1.993522 -0.128225 -3.037183  
Na -0.149983 -1.275407 -2.117410  
Cl 0.968244 -3.051356 0.000000  
Na -1.634595 -3.590003 0.000000  
Cl -2.638592 -2.254925 2.024855  
Na -3.291256 -0.440580 0.000000  
Cl -4.035892 2.079184 0.000000  
Na 2.683532 -0.874451 0.000000  
Cl 1.993522 -0.128225 3.037183  
Na -0.149983 -1.275407 2.117410  
Cl -2.638592 -2.254925 -2.024855  
Cl 3.958737 1.480479 0.000000  
Na 1.993522 2.132346 -1.670580

#### A8f

Cl -0.099548 0.284947 0.342462  
Na -0.585722 2.805451 1.170840  
Cl -3.185073 2.184782 1.252402  
Na -2.736400 -0.464887 1.660878  
Cl -1.363134 -2.738506 2.258238  
Na 1.023319 -1.786147 1.661897  
Cl 1.025994 -2.804026 -1.456905  
Na 3.333405 -1.636642 -0.973581  
Cl 3.287380 0.785199 -1.942110  
Na 2.892650 1.460214 0.697054  
Cl 1.802981 3.574829 1.774245  
Na -1.437637 -2.630653 -0.499380  
Cl -3.743128 -1.380052 -0.696089  
Na 0.646968 0.386549 -2.280725  
Cl 3.567969 -1.108822 1.610674  
Na -2.988204 1.108584 -1.295309  
Cl -1.389452 1.691817 -3.234587

#### A8g

Cl 0.065893 -0.092622 0.000000



Na 0.825312 -2.857245 1.609109  
Cl 2.619484 -3.787075 0.000000  
Na 0.825312 -2.857245 -1.609109  
Cl -1.519764 -3.294875 -0.000000  
Na -1.972959 -1.063877 -1.652677  
Cl -0.301758 3.327057 -2.057258  
Na 1.288241 1.064743 -2.060313  
Cl 3.070600 2.081567 0.000000  
Na 1.241421 3.927645 -0.000000  
Cl -0.301758 3.327057 2.057258  
Na 1.288241 1.064743 2.060313  
Cl 0.067285 -1.125379 3.479109  
Na -1.972959 -1.063877 1.652677  
Cl 0.067285 -1.125379 -3.479109  
Cl -3.617256 0.360560 -0.000000  
Na -1.754446 2.293705 -0.000000

#### A8h

Cl -0.626964 0.034936 -0.000000  
Na -2.121451 0.485439 2.242777  
Cl -2.337474 -1.786693 3.381488  
Na -0.161710 -2.437767 2.085405  
Cl 2.171328 -0.944134 2.546083  
Na 1.344092 1.493253 2.054263  
Cl 2.171328 -0.944134 -2.546083  
Na 1.344092 1.493253 -2.054263  
Cl -1.028433 2.878256 -2.544094  
Na -0.459488 3.387450 0.000000  
Cl -1.028433 2.878256 2.544094  
Na 2.383469 -1.661692 -0.000000  
Cl 0.791793 -3.817280 -0.000000  
Na -2.121451 0.485439 -2.242777  
Cl 2.194667 2.964916 0.000000  
Na -0.161710 -2.437767 -2.085405  
Cl -2.337474 -1.786693 -3.381488

#### A8i

Cl 1.014424 -2.145830 -1.110384  
Na 3.615841 -1.939113 -0.666322  
Cl 3.551867 -1.212167 1.858875  
Na 0.853204 -1.511299 1.639015  
Cl -1.716633 -2.238386 1.808359  
Na -2.177832 0.247453 2.429835  
Cl 0.363494 1.082372 2.337472  
Na 3.033023 1.289601 0.759669  
Cl 4.041435 0.314415 -1.838127  
Na 1.353386 0.660105 -2.101629  
Cl 1.652932 3.056875 -0.700691  
Na -0.746183 2.421084 0.218450  
Cl -3.414780 2.159885 1.078695  
Na -1.760210 -1.917453 -0.964585  
Cl -1.333943 -0.793738 -1.925529  
Cl -4.338868 -1.775405 -1.638863  
Na -3.892936 0.694763 -1.113228

#### A8j

Cl -0.176771 0.488716 -0.618092  
Na -0.431936 3.250534 -0.537316  
Cl -2.857945 3.438840 0.331799  
Na -3.233314 0.957059 1.010813  
Cl -2.067238 -0.772390 2.701072  
Na 0.413594 -0.170499 2.102131  
Cl 1.175923 -2.747907 1.221451  
Na 3.501595 -1.471038 1.191549  
Cl 3.779727 -0.895046 -1.371374  
Na 2.813035 1.566828 -0.548074  
Cl 1.939838 3.870061 -1.375981  
Na -1.829104 -2.322274 0.423149  
Cl -4.033539 -0.950807 -0.688868  
Na -2.058817 -0.498983 -2.303353  
Cl 2.873141 0.880812 2.154996  
Cl -0.956683 -2.891043 -2.309409

Na 1.324972 -1.962628 -1.409362

#### A8k

Cl 0.000000 -0.000000 1.519292  
Na 0.000000 1.789409 3.614261  
Cl 0.000000 3.592572 1.721472  
Na -1.607176 1.932858 0.047412  
Cl -3.238592 0.000000 -0.888489  
Na -1.607176 -1.932858 0.047412  
Cl 0.000000 -2.141159 -2.051113  
Na 1.607176 -1.932858 0.047412  
Cl 3.238592 -0.000000 -0.888489  
Na -0.000000 -1.789409 3.614261  
Cl 0.000000 -0.000000 5.493871  
Na -1.537417 0.000000 -3.151602  
Cl 0.000000 2.141159 -2.051113  
Na 1.607176 1.932858 0.047412  
Cl -0.000000 -3.592572 1.721472  
Cl 0.000000 0.000000 -5.298349  
Na 1.537417 -0.000000 -3.151602

#### A8l

Cl 1.898015 -0.014167 1.584374  
Na 2.061007 2.226882 -0.085150  
Cl -0.059150 1.873597 -2.093905  
Na -2.327579 0.200756 -1.842143  
Cl -0.768204 -1.894089 -1.188995  
Na -3.157195 -1.540894 0.554706  
Cl -4.590830 -1.143623 -1.615349  
Na 4.054519 -1.009480 0.354852  
Cl 3.855040 0.811929 -1.538905  
Na 1.488171 -0.639046 -1.725105  
Cl 2.878188 -3.201873 -0.293557  
Na 0.602851 -2.551676 1.036956  
Cl -1.480398 -1.904863 2.661692  
Na -0.637934 0.675423 2.133729  
Cl 0.567110 3.661431 1.576628  
Cl -2.820550 1.398192 0.746275  
Na -1.279001 3.277031 -0.177879

#### A8m

Cl 1.610361 -1.183973 -2.258147  
Na 0.274679 -3.691070 -0.555742  
Cl -1.311365 -4.092059 -2.555138  
Na -1.143905 -1.481793 -2.485136  
Cl -1.610361 1.183973 -2.258147  
Na -1.882290 0.865480 0.340768  
Cl -1.326429 -1.654266 0.716775  
Na 0.000000 -2.001256 3.012194  
Cl 1.912881 -3.245365 1.574463  
Na 1.882290 -0.865480 0.340768  
Cl -0.000000 -0.000000 4.640221  
Na 0.000000 2.001256 3.012194  
Cl -1.912881 3.245365 1.574463  
Na 1.143905 1.481793 -2.485136  
Cl 1.326429 1.654266 0.716775  
Cl 1.311365 4.092059 -2.555138  
Na -0.274679 3.691070 -0.555742

#### A8n

Cl 1.556473 -0.163623 -0.455219  
Na 3.813749 1.458748 -0.514488  
Cl 2.583699 3.715494 -0.612882  
Na 0.320059 2.816185 0.345124  
Cl -0.587734 1.748338 2.647395  
Na 0.181272 -0.717841 1.962668  
Cl -2.182449 -1.622333 1.133760  
Na -0.472454 -2.907107 -0.414299  
Cl -1.571773 -1.991281 -2.701888  
Na 3.430230 -2.043733 0.263468  
Cl 5.473104 -0.541279 -0.181849  
Na -2.941708 1.177638 1.321396

Cl -1.799326 2.013038 -1.163640  
Na -0.271573 0.268436 -2.288122  
Cl 1.462913 -3.352350 1.388914  
Cl -5.286800 0.620410 0.233912  
Na -3.515739 -0.711331 -1.121616

#### A8o

Na 2.860166 -1.951113 0.386007  
Cl 4.966388 -0.702680 -0.494996  
Na 3.665489 1.445624 -1.105293  
Cl 1.066447 0.492261 -0.719907  
Na -0.435452 -1.508004 -1.774233  
Cl 0.878913 -3.559936 -0.619512  
Na -0.394875 -2.952589 1.573966  
Cl 1.527554 -1.670493 2.838844  
Na 0.250781 0.431973 1.876371  
Cl -2.151621 -0.984183 1.088384  
Na -4.029618 -0.664836 -1.102755  
Cl -2.661145 -1.501895 -3.097116  
Cl -5.270633 1.348043 -0.028444  
Na -3.099523 1.629963 1.301121  
Cl -0.858258 2.895007 1.820612  
Cl 2.890060 3.941525 -1.265225  
Na 0.583851 3.170798 -0.417447

#### A8p

Cl -0.000000 0.000000 0.936206  
Na -0.000000 1.829156 3.484278  
Cl -0.000000 0.000000 5.274195  
Na 0.000000 -3.195605 0.159938  
Cl 2.030836 -2.659153 -1.581244  
Na 1.877532 -0.000000 -1.204273  
Cl 0.000000 -0.000000 -3.889585  
Na -0.000000 2.498286 -3.257080  
Cl -2.030836 2.659153 -1.581244  
Na 0.000000 3.195605 0.159938  
Cl -0.000000 4.193458 2.530817  
Na -0.000000 -2.498286 -3.257080  
Cl -2.030836 -2.659153 -1.581244  
Na -1.877532 0.000000 -1.204273  
Cl 2.030836 2.659153 -1.581244  
Na -0.000000 -1.829156 3.484278  
Cl -0.000000 -4.193458 2.530817

#### A8q

Cl -1.646105 2.619845 0.000000  
Na -3.041192 0.418425 0.000000  
Cl -3.132204 -0.483180 2.495245  
Na -0.721678 0.945716 2.705316  
Cl 1.700271 2.026543 2.436308  
Na 2.436119 -0.583807 1.976122  
Cl -0.172737 -1.007913 0.000000  
Na -1.153477 -2.201287 -2.184989  
Cl -3.132204 -0.483180 -2.495245  
Na -0.721678 0.945716 -2.705316  
Cl 0.659895 -1.466731 -3.832580  
Na 2.436119 -0.583807 -1.976122  
Cl 3.967340 -1.315168 -0.000000  
Na 0.985158 2.564831 -0.000000  
Cl 1.700271 2.026543 -2.436308  
Cl 0.659895 -1.466731 3.832580  
Na -1.153477 -2.201287 2.184989

#### A8r

Na 0.026815 2.081287 0.913254  
Cl 1.968823 1.149921 2.806875  
Na 3.736287 1.332262 0.809214  
Cl 5.003018 -0.748681 -0.067152  
Na 2.926917 -1.936287 -1.035706  
Cl 1.065562 -1.009502 -2.706114  
Na -0.758464 -1.886721 -0.883129  
Cl 1.202733 -3.166748 0.614796

Na 0.984325 -1.230642 2.375757  
Cl -1.351036 -0.285488 1.506341  
Na -3.543465 0.895756 -0.887673  
Cl -3.383637 -1.872340 -1.254014  
Cl -1.513895 2.452301 -1.388082  
Na 0.762438 1.562529 -2.381100  
Cl 2.222155 2.890458 -0.660226  
Cl -5.385315 0.844340 1.014669  
Na -3.869665 -1.211133 1.294784

#### A8s

Cl -1.222089 0.604423 -0.017373  
Na -2.908239 2.726937 0.132367  
Cl -0.984640 4.469779 -0.258720  
Na 0.731447 2.476340 -0.475035  
Cl 1.717452 0.853372 -2.515277  
Na -0.361857 -0.825045 -2.111702  
Cl 1.390876 -2.509158 -0.187178  
Na -1.027408 -3.573326 0.061399  
Cl -1.899556 -2.448969 2.257170  
Na -3.467366 -0.938154 0.347427  
Cl -5.010326 1.203417 0.488782

Na 3.202866 -0.657260 -0.922696  
Cl 2.103517 1.199602 1.774815  
Na 0.218574 -0.793755 1.753721  
Cl -2.440832 -2.557290 -1.884791  
Cl 5.699426 -0.396020 -0.029215  
Na 4.610611 0.936475 1.789100

#### A8t

Cl -1.221904 0.603718 0.014295  
Na -2.910374 2.725885 -0.130516  
Cl -0.987572 4.469636 0.260122  
Na 0.730464 2.476648 0.472045  
Cl 2.100402 1.202787 -1.778859  
Na 0.221461 -0.795478 -1.754755  
Cl 1.391776 -2.507205 0.191898  
Na -1.025088 -3.573114 -0.060371  
Cl -2.438820 -2.557279 1.885519  
Na -3.464963 -0.939584 -0.348675  
Cl -5.010707 1.199890 -0.488269  
Na 3.204321 -0.656202 0.929110  
Cl 1.715627 0.856236 2.515456  
Na -0.360745 -0.824562 2.110012

Cl -1.895081 -2.452407 -2.257982  
Na 4.606684 0.935721 -1.789854  
Cl 5.698081 -0.394344 0.028589

#### A8u

Cl 1.435179 -0.629829 -1.141432  
Na 2.374142 -3.026245 -0.261186  
Cl 0.477652 -4.515773 -1.180756  
Na -0.848047 -2.212434 -1.320814  
Cl -1.356633 -1.512602 1.415126  
Na -3.016249 1.032702 -0.332447  
Cl -1.429011 3.157367 -0.499621  
Na 0.082705 1.486739 -2.120132  
Cl 2.525472 2.925372 -1.523199  
Na 0.928996 3.508807 0.517492  
Cl 1.972832 1.983469 2.350140  
Na 3.339027 0.898322 0.145902  
Cl 3.583951 -1.579235 1.589948  
Na 1.027542 -0.432406 1.828269  
Cl -2.112374 -0.188263 -2.542328  
Na -3.765491 -1.373600 2.133451  
Cl -5.176415 0.435921 1.15001

## 6.4 Structures Anionic Clusters: $\omega$ B97XD/aug-cc-pVDZ

#### A1a

Cl -0.000000 0.000000 -2.542373  
Na 0.000000 0.000000 0.000000  
Cl -0.000000 0.000000 2.542373

#### A2a

Na 0.000000 2.492163 0.127058  
Cl 0.000000 -0.000000 0.857115  
Cl 0.000000 -4.908178 -0.510771  
Na -0.000000 -2.492163 0.127058  
Cl 0.000000 4.908178 -0.510771

#### A2b

Na 0.000000 0.000000 1.369881  
Cl -0.000000 2.326128 0.000000  
Na 0.000000 -0.000000 -1.369881  
Cl -2.014486 -1.163064 0.000000  
Cl 2.014486 -1.163064 0.000000

#### A2c

Cl 0.000000 2.091337 -1.144909  
Na -0.000000 -0.000000 -2.520825  
Cl -0.000000 -2.091337 -1.144909  
Na 0.000000 0.000000 0.827760  
Cl 0.000000 0.000000 3.385331

#### A3a

Cl -2.441127 1.409385 -0.779135  
Na 0.000000 1.899317 0.133092  
Na -1.644857 -0.949659 0.133092  
Cl 2.441127 1.409385 -0.779135  
Cl -0.000000 -2.818770 -0.779135  
Na 1.644857 -0.949659 0.133092  
Cl 0.000000 0.000000 2.079050

#### A3b

Cl 0.000000 1.490348 -0.000000  
Na -2.388448 2.313411 0.000000  
Cl -3.947159 0.318450 0.000000  
Na -1.488965 -0.843880 0.000000  
Cl 0.409317 -2.565455 0.000000  
Na 2.171378 -0.503754 -0.000000  
Cl 4.641747 0.131743 -0.000000

#### A3c

Cl 2.753781 1.254319 0.000000

Na 2.239264 3.717258 0.000000  
Cl -0.257835 4.051110 0.000000  
Na -0.000000 1.301193 0.000000  
Cl -1.715253 -0.684715 0.000000  
Na -1.383405 -3.253026 0.000000  
Cl -1.334484 -5.763048 0.000000

#### A3d

Na 1.554547 4.651864 0.000000  
Cl -0.000000 2.552964 0.000000  
Na 0.000000 0.000000 0.000000  
Cl -0.000000 -2.552964 0.000000  
Na -1.554547 -4.651864 0.000000  
Cl -3.055091 -6.636617 -0.000000  
Cl 3.055091 6.636617 -0.000000

#### A4a

Cl 2.580216 2.580216 -0.393249  
Na 0.000000 2.490183 0.103183  
Cl -2.580216 2.580216 -0.393249  
Na -2.490183 0.000000 0.103183  
Cl -2.580216 -2.580216 -0.393249  
Na -0.000000 -2.490183 0.103183  
Cl 2.580216 -2.580216 -0.393249  
Na 2.490183 -0.000000 0.103183  
Cl 0.000000 0.000000 1.305936

#### A4b

Na -0.485493 1.757660 -1.509787  
Cl 0.000000 3.775963 0.049352  
Na 1.105530 1.620090 1.165834  
Cl -0.000000 -0.000000 2.897261  
Na -1.105530 -1.620090 1.165834  
Cl -0.000000 -3.775963 0.049352  
Cl -1.901488 -0.473136 -1.275426  
Cl 1.901488 0.473136 -1.275426  
Na 0.485493 -1.757660 -1.509787

#### A4c

Cl 2.179748 -3.132719 -0.000000  
Na 0.553233 -1.743321 1.538129  
Na 0.553233 -1.743321 -1.538129  
Cl -1.700563 -1.905384 -0.000000  
Cl 0.553233 0.835893 -2.051693  
Na 0.726838 2.566829 0.000000  
Na -1.580967 0.779311 0.000000

Cl 0.553233 0.835893 2.051693  
Cl -1.748927 3.457230 0.000000

#### A4d

Cl 0.000000 2.425582 0.056483  
Na 1.674445 0.966741 -1.322999  
Cl 2.100616 -1.212791 0.056483  
Na -1.674445 0.966741 -1.322999  
Cl -2.100616 -1.212791 0.056483  
Na -0.000000 -1.933482 -1.322999  
Cl 0.000000 0.000000 -3.239688  
Na 0.000000 0.000000 1.871103  
Cl 0.000000 0.000000 4.427701

#### A4e

Na 0.375900 -2.879193 -0.000000  
Cl 1.385346 -0.261461 -0.000000  
Na -0.774679 -0.235982 1.711797  
Cl -1.767393 1.580808 0.000000  
Na -0.774679 -0.235982 -1.711797  
Cl -0.774679 -2.743636 -2.361524  
Cl -0.774679 -2.743636 2.361524  
Na 0.858225 2.533755 0.000000  
Cl 2.135379 4.696833 0.000000

#### A4f

Cl 2.032407 -1.437626 0.000130  
Na 4.521415 -1.940375 0.000310  
Cl 5.775630 0.257898 0.000528  
Na 3.216545 1.104180 0.000204  
Cl 1.052411 2.492459 -0.000343  
Na -0.266747 0.191824 -0.000572  
Cl -2.669096 -0.846330 -0.001278  
Na -5.190052 -0.260212 -0.000081  
Cl -7.667397 0.118917 0.001052

#### A4g

Cl -2.406946 1.672576 0.003161  
Na -4.756445 0.677308 -0.004741  
Cl -4.552197 -1.837764 -0.002965  
Na -1.961329 -1.162830 0.003651  
Cl 0.619727 -1.077909 0.004140  
Na 0.341200 1.567475 0.002029  
Cl 2.739678 2.424209 -0.002814  
Na 3.458897 -0.207579 -0.000407  
Cl 5.487647 -1.746883 -0.001866

A4h  
 Cl 4.222469 0.002686 -2.013149  
 Na 2.347594 -0.499097 -0.012922  
 Cl -0.047559 -1.547811 -0.076614  
 Na -2.399615 -0.414448 -0.036485  
 Cl -4.974158 -1.462629 0.175881  
 Na 5.436324 0.672589 0.083721  
 Cl 3.991767 0.268459 2.099774  
 Na -5.378326 1.012156 0.004820  
 Cl -3.196387 2.240283 -0.211215

A4i  
 Na -7.350683 -0.101246 -0.000000  
 Cl -9.691337 0.727719 0.000000  
 Cl -4.864605 -0.916856 -0.000000  
 Na -2.458694 -0.097764 -0.000000  
 Cl 0.000000 0.634982 0.000000  
 Na 2.458583 -0.097709 -0.000000  
 Cl 4.864518 -0.916349 -0.000000  
 Na 7.350727 -0.101041 -0.000000  
 Cl 9.691467 0.727878 0.000000

A5a  
 Na 1.620923 -0.000000 -2.241018  
 Cl 0.000000 2.086222 -2.637625  
 Cl -0.000000 -2.086222 -2.637625  
 Na -1.620923 0.000000 -2.241018  
 Cl -1.950667 0.000000 0.329863  
 Na 0.000000 -2.028926 0.202933  
 Cl 1.950667 -0.000000 0.329863  
 Na 0.000000 2.028926 0.202933  
 Cl 0.000000 2.657848 2.767502  
 Na 0.000000 0.000000 2.655156  
 Cl -0.000000 -2.657848 2.767502

A5b  
 Cl 2.412725 -0.000000 0.069203  
 Na 1.599777 2.508001 -0.320328  
 Cl 0.000000 3.676990 -2.042257  
 Na -1.599777 2.508001 -0.320328  
 Na 1.599777 -2.508001 -0.320328  
 Cl -0.000000 -3.676990 -2.042257  
 Na -1.599777 -2.508001 -0.320328  
 Cl -2.412725 0.000000 0.069203  
 Cl 0.000000 -2.681712 1.865790  
 Na 0.000000 0.000000 1.612853  
 Cl 0.000000 2.681712 1.865790

A5c  
 Cl 2.530318 3.482683 0.000000  
 Na 0.000000 2.992731 -0.000000  
 Cl -2.530318 3.482683 -0.000000  
 Na 2.846256 0.924805 -0.000000  
 Cl 4.094140 -1.330267 0.000000  
 Na 1.759083 -2.421170 -0.000000  
 Cl -0.000000 -4.304833 0.000000  
 Na -1.759083 -2.421170 -0.000000  
 Cl -4.094140 -1.330267 0.000000  
 Na -2.846256 0.924805 -0.000000  
 Cl 0.000000 0.000000 0.000000

A5e  
 Cl -0.892258 -0.841550 -2.343339  
 Na -2.676933 -1.313824 -0.480131  
 Cl -1.162722 -2.301893 1.344304  
 Cl -3.111190 1.160179 0.368786  
 Na -1.191948 1.624695 -1.472798  
 Cl 0.556811 2.768553 0.072074  
 Na 2.688964 1.149882 0.150567  
 Cl 3.282132 -0.792735 -1.477996  
 Cl 1.828978 -0.206517 2.232325

Na 1.078964 -1.671406 -0.200697  
 Na -0.674481 0.541322 1.699914

A5f  
 Na 0.000000 1.955998 -0.000000  
 Cl -2.002877 1.148030 1.849362  
 Na 0.000000 0.000000 3.040142  
 Cl 1.995662 1.160527 1.849362  
 Na 1.693944 -0.977999 -0.000000  
 Cl 0.007215 -2.308557 1.849362  
 Na -1.693944 -0.977999 -0.000000  
 Cl -1.995662 1.160527 -1.849362  
 Na 0.000000 0.000000 -3.040142  
 Cl -0.007215 -2.308557 -1.849362  
 Cl 2.002877 1.148030 -1.849362

A5g  
 Na 0.883630 0.005024 1.393244  
 Cl 0.430027 -2.999051 0.633469  
 Na 1.954056 -1.813080 -1.052547  
 Cl 3.485259 -0.000421 0.162520  
 Na 1.956503 1.811367 -1.057327  
 Cl 0.433803 2.994887 0.634324  
 Cl -1.611097 -0.000576 2.172549  
 Na -1.824815 1.558108 -0.055721  
 Cl 0.189111 -0.000342 -1.845621  
 Na -1.823270 -1.556939 -0.059581  
 Cl -3.668701 0.002603 -1.218933

A5h  
 Na -0.575056 -0.691518 2.214512  
 Cl 0.166994 1.866089 2.037463  
 Na 2.060237 2.526803 0.000000  
 Cl 4.325993 3.620200 0.000000  
 Cl -0.575056 -3.273058 2.497875  
 Na -1.334532 -3.303681 -0.000000  
 Cl -0.575056 -3.273058 -2.497875  
 Na -0.575056 -0.691518 -2.214512  
 Cl 0.166994 1.866089 -2.037463  
 Cl -2.290532 -0.633757 -0.000000  
 Na -1.460026 1.893314 0.000000

A5i  
 Cl -0.716483 1.253346 3.654870  
 Na 0.313123 -0.255480 1.819691  
 Na -0.716483 3.101162 1.781258  
 Cl -1.646994 4.771941 0.000000  
 Na -0.716483 3.101162 -1.781258  
 Cl -0.716483 1.253346 -3.654870  
 Na 0.313123 -0.255480 -1.819691  
 Cl 0.903895 1.661126 0.000000  
 Cl 0.394542 -2.265903 -0.000000  
 Na 0.987258 -4.842453 -0.000000  
 Cl 1.664703 -7.223152 -0.000000

A5j  
 Cl 2.761285 3.279905 -0.000000  
 Na 1.653514 1.747799 1.785581  
 Cl 1.653514 -0.236601 3.500186  
 Na 0.193940 -1.508602 1.808862  
 Cl -1.093529 -2.985944 0.000000  
 Na 0.193940 -1.508602 -1.808862  
 Cl 1.653514 -0.236601 -3.500186  
 Na 1.653514 1.747799 -1.785581  
 Cl -0.255484 0.568731 -0.000000  
 Na -2.856095 -0.816784 -0.000000  
 Cl -5.262061 -0.170529 -0.000000

A5k  
 Na 0.000000 2.026260 -0.065031  
 Cl 0.000000 0.000000 1.915043  
 Na -1.754792 -1.013130 -0.065031

Cl -0.000000 -2.430211 -1.337290  
 Na 1.754792 -1.013130 -0.065031  
 Cl 2.104624 1.215105 -1.337290  
 Cl -2.104624 1.215105 -1.337290  
 Na 0.000000 0.000000 -3.179119  
 Cl 0.000000 0.000000 -5.713290  
 Na 0.000000 0.000000 4.569785  
 Cl 0.000000 0.000000 7.036511

A6a  
 Cl 0.767935 1.376814 3.669822  
 Na 0.732072 -0.670675 1.998473  
 Cl -0.995746 -2.913817 2.046467  
 Na 0.544106 -3.616700 -0.000000  
 Cl -0.995746 -2.913817 -2.046467  
 Na 0.732072 -0.670675 -1.998473  
 Cl 0.767935 1.376814 -3.669822  
 Na -0.255386 2.821783 -1.779026  
 Cl -0.566186 4.714637 0.000000  
 Na -0.255386 2.821783 1.779026  
 Cl -0.914658 0.713933 0.000000  
 Na -2.113085 -1.660609 -0.000000  
 Cl 2.334801 -1.723621 -0.000000

A6b  
 Cl 2.363145 1.957184 0.374118  
 Na 0.000000 2.874885 -0.377929  
 Cl -2.363145 1.957184 0.374118  
 Cl 0.000000 1.859083 -2.776605  
 Na 1.732212 -0.000000 -1.637835  
 Na -1.732212 0.000000 -1.637835  
 Na 1.892862 -0.000000 2.120652  
 Cl -0.000000 -1.859083 -2.776605  
 Na -0.000000 -2.874885 -0.377929  
 Cl -2.363145 -1.957184 0.374118  
 Cl 2.363145 -1.957184 0.374118  
 Na -1.892862 0.000000 2.120652  
 Cl 0.000000 0.000000 3.921001

A6c  
 Na 1.859948 0.841790 0.000000  
 Cl 1.952937 -1.839799 -0.000000  
 Cl -1.548052 4.255371 0.000000  
 Cl 1.433859 1.476981 2.608192  
 Na -0.900846 2.383924 -1.692710  
 Cl -1.072438 0.245836 0.000000  
 Na 0.544241 -1.081877 -2.255770  
 Cl -1.163973 -3.003298 -2.626583  
 Na -0.949261 -2.841263 -0.000000  
 Cl -1.163973 -3.003298 2.626583  
 Na 0.544241 -1.081877 2.255770  
 Na -0.900846 2.383924 1.692710  
 Cl 1.433859 1.476981 -2.608192

A6d  
 Cl 0.279180 0.931139 2.486246  
 Na -0.447829 -1.610371 2.327975  
 Cl -1.891374 -1.411069 0.000000  
 Na -0.995648 1.188898 -0.000000  
 Cl -0.765762 3.875262 -0.000000  
 Na 1.296707 3.260336 1.631292  
 Cl 3.262023 3.847681 -0.000000  
 Na 1.296707 3.260336 -1.631292  
 Cl 0.279180 0.931139 -2.486246  
 Na -0.447829 -1.610371 -2.327975  
 Cl -0.447829 -4.209547 -2.528611  
 Cl -0.447829 -4.209547 2.528611  
 Na -1.115656 -4.110280 0.000000

A6e  
 Cl 1.863259 0.622181 1.841107  
 Na 2.002050 -1.872196 0.232350

Cl 3.972694 -0.912326 -1.238019  
Na 2.158217 1.038842 -1.063833  
Cl 0.356848 3.142461 -1.227467  
Na -1.948069 1.241963 -1.028859  
Cl 0.021099 -0.648121 -1.277054  
Na -0.572164 -0.541166 1.683706  
Cl -0.294203 -3.191477 1.318331  
Na -1.908964 -2.401409 -0.752769  
Cl -3.791156 -0.740147 -1.417857  
Cl -2.113337 1.628153 1.734854  
Na 0.245433 2.687392 1.340656

#### A6f

Cl 0.000000 0.000000 2.945331  
Na 1.799504 1.038944 1.210960  
Cl 2.359566 1.362296 -1.723830  
Na 0.000000 2.517445 -1.548148  
Cl -2.359566 1.362296 -1.723830  
Na -2.180172 -1.258723 -1.548148  
Cl -0.000000 -2.724593 -1.723830  
Na -0.000000 -2.077888 1.210960  
Cl 0.000000 3.188479 0.960233  
Na -1.799504 1.038944 1.210960  
Cl -2.761304 -1.594239 0.960233  
Na 2.180172 -1.258723 -1.548148  
Cl 2.761304 -1.594239 0.960233

#### A6g

Cl 2.718063 1.569275 1.535744  
Na 0.000000 2.385087 1.159132  
Cl -2.718063 1.569275 1.535744  
Na -2.065546 1.192544 -1.159132  
Cl 0.000000 3.138549 -1.535744  
Na 2.065546 1.192544 -1.159132  
Cl 2.718063 -1.569275 -1.535744  
Na 2.065546 -1.192544 1.159132  
Cl -0.000000 -3.138549 1.535744  
Na -0.000000 -2.385087 -1.159132  
Cl 0.000000 0.000000 0.000000  
Na -2.065546 -1.192544 1.159132  
Cl -2.718063 -1.569275 -1.535744

#### A6h

Cl 0.005643 3.636879 2.423568  
Na 1.709312 1.705450 2.002699  
Cl 2.799550 2.360868 -0.334760  
Na 0.000000 2.985736 -0.162400  
Na -1.507974 -0.504617 -1.745034  
Cl -0.000000 0.000000 0.734674  
Na -1.709312 -1.705450 2.002699  
Cl -2.799550 -2.360868 -0.334760  
Cl -0.005643 -3.636879 2.423568  
Na -0.000000 -2.985736 -0.162400  
Cl 0.751672 -1.953078 -2.517786  
Cl -0.751672 1.953078 -2.517786  
Na 1.507974 0.504617 -1.745034

#### A6i

Na -0.800003 1.659678 -0.344618  
Cl -1.929933 -0.075492 1.744947  
Na 0.769886 -0.347090 1.591801  
Cl 3.201364 -1.435508 1.565848  
Na 2.871938 -1.548034 -1.116575  
Cl 0.219991 -1.101533 -1.146092  
Na -4.185284 0.576917 0.214144  
Cl -3.146550 2.526606 -1.149781  
Cl 1.500106 2.203576 1.004207  
Na 3.804219 1.007672 0.445648  
Cl 4.724232 0.133705 -1.848271  
Cl -4.753594 -1.900009 -0.510633  
Na -2.175799 -1.892133 -0.265293

#### A6j

Na -1.685059 -2.996161 0.000000  
Cl -1.923859 -0.409936 0.000000  
Cl -0.078473 -3.387921 2.070351  
Na 1.601305 -3.445847 0.000000  
Cl 2.502688 -1.036657 0.000000  
Cl -0.078473 -3.387921 -2.070351  
Na 0.409064 -0.525597 -1.698637  
Cl 0.409064 2.091338 -2.091412  
Na 0.972473 3.710409 -0.000000  
Cl 0.409064 2.091338 2.091412  
Na 0.409064 -0.525597 1.698637  
Cl -1.344109 4.990747 -0.000000  
Na -1.545968 2.313087 -0.000000

#### A6k

Cl 2.596483 -0.493564 0.000000  
Na 1.962674 2.143093 0.000000  
Cl 0.483379 2.252520 2.125361  
Na -1.599286 2.578639 0.000000  
Cl -3.624209 4.130950 0.000000  
Na 1.983319 -3.042925 0.000000  
Cl 0.337183 -3.208733 2.065728  
Na -1.348977 -2.965040 0.000000  
Cl 0.337183 -3.208733 -2.065728  
Na 0.337183 -0.387130 -1.834515  
Cl 0.483379 2.252520 -2.125361  
Na 0.337183 -0.387130 1.834515  
Cl -1.695343 -0.391699 0.000000

#### A6m

Na -3.689655 -1.065645 -0.024740  
Cl -2.310594 -0.824457 2.219623  
Cl -3.739588 1.454732 -0.834065  
Cl -1.877105 -2.064690 -1.545785  
Na -1.085581 0.663899 -1.683761  
Na -0.058976 -1.560205 0.484259  
Na -2.276432 1.684404 1.399009  
Cl 1.449106 -0.408326 -1.776365  
Na 2.333057 1.207465 0.422700  
Cl 2.280379 -1.433974 1.745338  
Cl -0.057384 2.435760 0.307799  
Cl 4.954706 1.031271 -0.175723  
Na 3.696512 -1.224043 -0.506009

#### A6o

Cl 0.086789 1.111214 2.340501  
Na 0.086789 3.687758 1.602640  
Cl 1.696256 4.981269 -0.000000  
Na 0.086789 3.687758 -1.602640  
Cl 0.086789 1.111214 -2.340501  
Na 0.768089 -1.309557 -1.667998  
Cl 2.201496 -2.811560 0.000000  
Na 0.768089 -1.309557 1.667998  
Cl -2.089733 3.527508 -0.000000  
Na -1.492912 0.915293 -0.000000  
Cl -1.331512 -1.864368 0.000000  
Na -0.072004 -4.441037 0.000000  
Cl -0.743806 -6.851585 0.000000

#### A6p

Cl 1.720791 -3.822242 0.000000  
Na 1.243388 -1.257342 0.000000  
Cl 1.446275 1.722463 0.000000  
Na 3.371691 3.556241 0.000000  
Cl 4.843799 5.535847 0.000000  
Na -0.719669 1.418400 1.683354  
Cl -0.719669 -1.143794 1.940219  
Cl -2.693607 1.908341 0.000000  
Na -2.770153 -0.945875 0.000000  
Cl -3.548281 -3.448470 0.000000  
Na -0.915029 -3.584548 0.000000

Cl -0.719669 -1.143794 -1.940219  
Na -0.719669 1.418400 -1.683354

#### A6q

Cl 4.645633 2.427724 0.758265  
Na 2.150472 2.882884 0.355526  
Cl -0.018729 4.027448 -0.451497  
Na -0.998351 1.675691 -0.625233  
Cl 1.207618 0.000190 0.000701  
Na 2.149620 -2.883488 -0.354756  
Cl -0.018261 -4.026835 0.457548  
Na -0.996543 -1.674294 0.630603  
Cl -2.962016 -0.000293 0.002815  
Na -5.625074 -0.000582 -0.001065  
Cl -8.095503 0.000090 -0.004895  
Cl 4.643618 -2.428332 -0.764307  
Na 4.243501 -0.000198 -0.002958

#### A7a

Na -1.933672 0.000000 1.065376  
Cl -2.103424 2.735603 0.967090  
Na 0.000000 2.553864 2.495617  
Cl 2.103424 2.735603 0.967090  
Na 1.933672 -0.000000 1.065376  
Cl 2.103424 -2.735603 0.967090  
Na -0.000000 -2.553864 2.495617  
Cl -2.103424 -2.735603 0.967090  
Na 0.000000 -2.722767 -1.013788  
Cl 0.000000 -0.000000 -0.800598  
Na 0.000000 2.722767 -1.013788  
Cl 0.000000 -2.630366 -3.678664  
Cl -0.000000 0.000000 3.282475  
Cl 0.000000 2.630366 -3.678664  
Na 0.000000 -0.000000 -3.537998

#### A7b

Na 2.411311 -1.757951 -0.035052  
Cl 0.419233 -3.507512 -0.782653  
Cl 1.466454 -1.018483 2.584733  
Na 0.543492 1.395014 1.733965  
Cl 1.426771 3.543506 0.083131  
Na -0.966020 2.462379 -0.888555  
Cl -2.829325 0.904174 -2.255742  
Na -3.446581 0.465874 0.292359  
Cl -2.048611 2.230293 1.629130  
Cl 0.503387 0.152437 -0.815997  
Cl -3.072764 -2.100682 0.563011  
Na -1.446444 -1.556030 -1.646095  
Na -0.544739 -2.270869 1.389266  
Na 2.846637 1.560452 -0.950629  
Cl 4.524608 -0.397120 -0.937838

#### A7c

Na -0.000000 1.983840 1.624833  
Cl -0.000000 2.634182 4.175321  
Na -0.000000 -0.000000 4.074031  
Cl -0.000000 -2.634182 4.175321  
Na -0.000000 -1.983840 1.624833  
Cl 0.000000 -2.209034 -1.170015  
Na 0.000000 -1.678928 -3.723605  
Cl 2.057080 -0.000000 -3.875506  
Na 0.000000 1.678928 -3.723605  
Cl -2.057080 0.000000 -3.875506  
Na -1.758480 0.000000 -1.051057  
Cl -1.945418 0.000000 1.590257  
Cl 0.000000 2.209034 -1.170015  
Na 1.758480 -0.000000 -1.051057  
Cl 1.945418 -0.000000 1.590257

#### A7d

Na 0.013124 1.351285 1.344476  
Cl -1.959599 3.245270 0.293945

Na -3.162413 0.951123 -0.134692  
Cl -4.156441 -0.906652 -1.662503  
Na -1.901503 -1.882432 -0.735540  
Cl -2.051748 -0.531992 1.924971  
Na -0.018461 -2.176350 2.131493  
Cl 2.047694 -0.570910 1.918730  
Na 3.214703 0.892244 -0.114482  
Cl 2.033014 3.200977 0.292936  
Na 0.031975 2.878887 -1.378604  
Cl -0.017666 0.175152 -1.310096  
Na 1.846295 -1.898966 -0.752208  
Cl 4.123042 -0.973838 -1.681715  
Cl -0.033644 -3.712930 -0.009496

#### A7f

Na -1.440490 2.022881 -0.974059  
Cl -0.747874 -0.668617 -1.977331  
Na -3.194762 -1.323076 -1.206824  
Cl -3.917636 1.000767 -0.354147  
Na -1.992597 0.063772 1.596210  
Cl -1.076906 2.622086 1.695161  
Na 1.434171 2.022546 0.977821  
Cl 1.068431 2.630597 -1.688349  
Na 1.994183 0.076819 -1.598389  
Cl 2.535970 -2.674356 -0.950497  
Na 3.195712 -1.320245 1.205748  
Cl 3.914063 1.006556 0.355307  
Cl -2.526312 -2.682866 0.943481  
Na 0.004564 -2.403077 -0.004384  
Cl 0.749757 -0.677450 1.978882

#### A7h

Na -1.992587 -1.722669 -0.786420  
Cl -4.500954 -1.104018 -1.279641  
Na -3.791554 0.931400 0.190660  
Cl -2.780125 3.317714 0.395956  
Na -0.579097 1.886613 0.726453  
Cl -0.088907 0.204693 -1.539467  
Na 1.940333 1.836283 -1.861522  
Cl 3.900223 0.052023 -1.682439  
Na 1.874183 -1.670615 -0.854746  
Cl 2.655164 -1.446309 1.887295  
Na 0.107432 -2.118197 1.935718  
Cl -1.866500 -0.385680 1.819908  
Cl -0.025252 -3.545164 -0.304000  
Cl 2.010937 2.944053 0.557172  
Na 3.516022 0.799520 0.874283

#### A7i

Na 0.000000 2.348301 -1.147552  
Cl -2.134014 1.232073 -2.668446  
Cl 2.134014 1.232073 -2.668446  
Cl 0.000000 0.000000 0.105846  
Na 0.000000 0.000000 -3.597215  
Cl -0.000000 -2.464147 -2.668446  
Na 2.033689 -1.174151 -1.147552  
Cl 2.788314 -1.609834 1.448993  
Na 1.635738 0.944394 2.100931  
Cl 0.000000 0.000000 4.029448  
Na -1.635738 0.944394 2.100931  
Cl -2.788314 -1.609834 1.448993  
Na -2.033689 -1.174151 -1.147552  
Cl 0.000000 3.219668 1.448993  
Na -0.000000 -1.888788 2.100931

#### A7j

Cl 0.634738 -3.789880 0.000000  
Na -1.865317 -3.147790 0.000000  
Cl -1.960512 -1.878740 2.316156  
Na 0.991389 -1.593509 1.635792  
Na 0.991389 -1.593509 -1.635792  
Cl -1.960512 -1.878740 -2.316156

Na -1.960512 0.698035 -1.900568  
Na -1.960512 0.698035 1.900568  
Cl 0.617505 1.141582 2.028407  
Cl 0.617505 1.141582 -2.028407  
Na 2.652628 1.522083 0.000000  
Cl 3.172619 -1.071704 0.000000  
Cl -2.730641 2.405259 0.000000  
Na -0.011446 3.047520 0.000000  
Cl 2.361425 4.169492 0.000000

#### A7k

Na 1.936897 3.712667 0.000000  
Cl 2.225765 1.148944 0.000000  
Cl 0.286080 4.051396 2.075170  
Cl 0.286080 4.051396 -2.075170  
Na -1.358539 3.904154 0.000000  
Cl -2.004158 1.375312 0.000000  
Na 0.188900 1.187934 1.807786  
Cl -0.456953 -1.312313 2.520786  
Na 0.286080 -3.715075 1.620895  
Cl -1.860508 -4.059355 -0.000000  
Na -1.711754 -1.368696 -0.000000  
Cl -0.456953 -1.312313 -2.520786  
Na 0.188900 1.187934 -1.807786  
Cl 2.099341 -4.715552 -0.000000  
Na 0.286080 -3.715075 -1.620895

#### A7n

Na 0.439903 -3.608827 1.665494  
Cl 1.401460 -1.600440 0.000000  
Cl -1.369320 -1.896635 2.541205  
Na -1.695053 -1.132458 0.000000  
Cl -0.909017 1.497826 -0.000000  
Cl -1.369320 -1.896635 -2.541205  
Na 0.452712 0.146869 2.111644  
Cl 1.090663 2.214695 3.558426  
Na -0.106506 3.652734 1.760315  
Cl -0.393409 5.547060 -0.000000  
Na -0.106506 3.652734 -1.760315  
Cl 1.090663 2.214695 -3.558426  
Na 0.452712 0.146869 -2.111644  
Na 0.439903 -3.608827 -1.665494  
Cl 0.537762 -5.594687 0.000000

#### A7o

Na -1.665747 2.363300 1.582344  
Cl -3.702073 1.547088 -0.000000  
Na -2.143346 -0.607210 -0.000000  
Cl -0.162707 -2.852817 0.000000  
Cl -1.665747 -0.065758 2.875391  
Na 0.579702 -1.024916 2.012901  
Cl 3.259103 -1.613224 -2.035801  
Na 0.579702 -1.024916 -2.012901  
Cl -1.665747 -0.065758 -2.875391  
Na -1.665747 2.363300 -1.582344  
Cl -0.893860 4.378888 -0.000000  
Na 2.466562 -3.132378 0.000000  
Cl 3.259103 -1.613224 2.035801  
Cl 0.688172 0.887982 -0.000000  
Na 3.214683 0.130637 0.000000

#### A7p

Na -4.466795 -1.015609 0.948818  
Cl -4.063132 -1.220152 -1.752723  
Na -1.512353 -1.366901 -0.982008  
Cl 1.197440 -1.453310 -0.779967  
Cl -2.029438 -1.744854 1.713360  
Na 0.001030 -0.003841 1.492268  
Cl 2.030089 1.737576 1.719183  
Na 1.512466 1.371097 -0.977733  
Cl -1.197945 1.455684 -0.773232  
Na -3.869117 1.375512 -0.991990

Cl -5.565278 1.363623 0.992840  
Na 3.867718 -1.370827 -0.996704  
Cl 4.063289 1.227663 -1.748670  
Cl 5.564241 -1.367765 0.987798  
Na 4.468186 1.012945 0.953164

#### A7q

Na -3.993854 -0.787376 0.768325  
Cl -2.459959 0.922402 1.941523  
Cl -3.941457 0.098856 -1.751908  
Na -1.989698 -1.690236 -1.681515  
Cl 0.094287 -0.144427 -1.203217  
Cl -2.368384 -2.898949 0.638439  
Na -1.978645 1.863403 -0.590749  
Cl -0.249893 3.822890 -0.516926  
Na 1.465470 2.038943 0.425369  
Cl 3.910819 1.357550 -0.634796  
Na 3.743685 -0.754622 1.045702  
Cl 1.739244 0.132631 2.504576  
Na -0.509487 -0.938133 1.515381  
Na 2.667220 -0.612970 -1.885132  
Cl 3.660544 -2.720900 -0.717172

#### A7r

Na -3.545407 -1.470038 0.499906  
Cl -1.696581 -3.312567 0.514718  
Cl -1.930749 0.308832 1.589010  
Na 0.186695 2.083974 1.138724  
Cl -1.460305 4.059180 0.434350  
Na -2.337113 1.886895 -0.792275  
Cl 0.207702 1.154278 -1.685558  
Na 2.574146 0.072455 -2.014167  
Cl 1.789323 -2.083986 -0.539709  
Cl -3.507356 -0.365975 -1.891169  
Cl 1.851253 0.355668 2.611634  
Na 0.103826 -1.535878 1.669135  
Na -0.920655 -1.325373 -1.315158  
Na 3.591719 -0.583525 0.882120  
Cl 4.971108 0.448477 -1.077459

#### A7s

Na 0.431539 -0.535234 1.419872  
Cl -0.077017 -2.985585 0.315636  
Na -2.497770 -2.144439 -0.470960  
Cl -2.854204 0.057663 -2.051794  
Na -0.875409 1.790542 -1.493425  
Cl 0.255123 4.171485 -1.111166  
Na 1.052823 2.667595 0.869292  
Cl 2.558493 0.993900 2.399897  
Na 3.818661 0.028511 0.271063  
Cl 1.480095 0.335370 -1.110494  
Na 1.965006 -2.334034 -1.256481  
Cl 4.533017 -2.239796 -0.787704  
Cl -1.411988 1.433066 1.358806  
Cl -4.557995 -1.797682 1.128069  
Na -3.779751 0.575863 0.442347

#### A7t

Na -3.053600 0.119836 0.887230  
Cl -1.940643 -2.374307 0.010310  
Na 0.149514 -0.940905 1.817992  
Cl -0.586417 0.633807 -1.163131  
Na 2.037549 1.542155 -1.338468  
Cl 1.460603 4.039547 -0.690169  
Na 0.158443 2.489858 1.021025  
Cl 2.352359 0.769553 1.422085  
Na 3.507004 -1.328279 0.346671  
Cl 2.927315 -0.929004 -2.213586  
Cl -1.439338 1.051265 2.749151  
Cl 1.730062 -3.078321 1.095382  
Na 0.593056 -1.934801 -1.100942  
Cl -4.895384 0.385029 -0.994708

Na -2.787009 -0.716833 -1.966296

A7u

Na -0.980922 -2.604949 -1.577047  
Cl -2.693539 -0.908978 -2.444798  
Cl -1.675005 -3.078656 0.877422  
Na 0.271009 -1.286187 1.675511  
Cl 2.855926 -0.686892 2.084284  
Na 2.626591 1.358863 0.038714  
Cl 0.557050 3.003279 -0.359487  
Na -1.417428 2.611565 1.372622  
Cl -1.592547 0.355094 2.674863  
Cl 1.023400 -0.899871 -1.160162  
Cl -3.335875 2.083742 -0.321465  
Na -1.096266 1.207150 -1.706412  
Na -3.000574 -0.566877 0.420397  
Cl 4.848487 0.600632 -1.282971  
Na 3.616297 -1.443380 -0.328390

A7v

Na -3.923790 -1.785729 0.427465  
Cl -5.592737 -0.006312 1.279776  
Na -3.955704 1.768166 0.358061  
Cl -2.988090 3.830169 -0.871827  
Na -0.753955 2.547209 -0.988776  
Cl 1.810007 2.360240 -0.511818  
Na 4.245929 1.603222 0.352929  
Cl 6.015448 0.021854 -0.748136  
Na 4.247139 -1.620731 0.263257  
Cl 3.341660 -0.066080 2.277872  
Na 1.168993 -0.007207 0.717844  
Cl -1.609187 0.001808 0.002264  
Cl 1.813699 -2.279080 -0.683470  
Cl -2.962093 -3.850436 -0.803415  
Na -0.763887 -2.523730 -1.039980

A7w

Na -3.136958 0.469995 0.000000  
Cl -2.459052 1.081418 2.546414  
Na -0.746964 2.887869 -1.694259  
Cl 0.398751 1.053174 0.000000  
Na 2.680352 -0.512816 0.000000  
Cl 5.020104 -1.793806 0.000000  
Na 2.921215 -3.387597 0.000000  
Cl 1.615109 -2.186601 2.049855  
Na -0.746964 -1.046565 1.799118  
Cl -2.459052 1.081418 -2.546414  
Cl -2.467807 -2.067810 0.000000  
Na -0.746964 -1.046565 -1.799118  
Cl 1.615109 -2.186601 -2.049855  
Na -0.746964 2.887869 1.694259  
Cl -0.924590 4.855627 0.000000

A7x

Na -3.217755 1.756186 -0.637788  
Cl -0.914657 1.666640 0.733440  
Na 1.753635 1.131101 1.150617  
Cl 0.913654 -1.673513 0.722757  
Na 0.000161 0.001999 -1.324525  
Cl -2.559157 -0.733773 -1.615345  
Cl -5.788812 1.553525 -0.777536  
Na -5.041536 -0.915998 -0.264451  
Cl -4.112146 -1.945659 1.930707  
Na -1.755943 -1.140933 1.143281  
Cl 2.557492 0.744042 -1.609558  
Na 5.040955 0.923572 -0.261081  
Cl 4.110311 1.926426 1.945640  
Cl 5.792066 -1.541401 -0.789829  
Na 3.222414 -1.750190 -0.641024

A7y

Na 2.583074 -1.770462 0.403013

Cl 2.333728 -1.433725 -2.247040  
Na -0.300994 -1.964947 -1.405016  
Cl -2.804270 -1.887283 -2.105712  
Na -3.693134 -0.203313 -0.324421  
Cl -2.623449 0.071811 2.327700  
Na -0.134683 -0.878203 2.155020  
Cl 2.607507 -0.207063 2.612684  
Na 2.481894 1.886453 1.044804  
Cl 0.166175 0.929223 -0.120220  
Na 1.967256 1.180881 -2.188836  
Cl 3.488338 2.989481 -1.067295  
Cl 0.430100 -3.172490 0.910518  
Cl -4.138816 2.419249 -0.645978  
Na -2.067809 2.199005 0.833690

A7z

Na 0.000000 2.932253 -0.422809  
Cl 0.000000 1.775672 1.980748  
Cl -2.309821 1.957604 -1.223690  
Na -1.887632 0.000000 -3.011950  
Cl 0.000000 -0.000000 -4.798377  
Na 1.887632 -0.000000 -3.011950  
Cl 2.309821 -1.957604 -1.223690  
Na -0.000000 -2.932253 -0.422809  
Cl -2.309821 -1.957604 -1.223690  
Cl 2.309821 1.957604 -1.223690  
Cl -0.000000 -1.775672 1.980748  
Na 1.799886 -0.000000 0.656960  
Na -1.799886 0.000000 0.656960  
Na -0.000000 0.000000 4.139768  
Cl -0.000000 0.000000 6.647766

A7za

Cl 1.722101 1.511598 0.000000  
Na -0.107982 0.655133 1.875271  
Cl 1.784482 -1.135201 2.703302  
Na 2.298307 -1.277768 -0.000000  
Cl 1.784482 -1.135201 -2.703302  
Na -0.107982 -2.865869 -2.196786  
Cl 0.881293 -3.906838 -0.000000  
Na -0.107982 -2.865869 2.196786  
Cl -2.188732 -1.220226 2.313890  
Na -3.033086 -0.300239 -0.000000  
Cl -1.797122 2.045773 0.000000  
Na -0.107982 0.655133 -1.875271  
Cl -2.188732 -1.220226 -2.313890  
Na 0.339143 3.909475 0.000000  
Cl 0.537714 6.412677 0.000000

A7zb

Na -1.837998 -1.499777 0.000000  
Cl -1.626254 -0.227157 2.455052  
Na 1.035996 -0.177119 2.003390  
Cl 3.464248 0.675638 2.552035  
Na 3.368774 1.233714 0.000000  
Cl 3.464248 0.675638 -2.552035  
Na 1.035996 -0.177119 -2.003390  
Cl -1.626254 -0.227157 -2.455052  
Na -1.626254 2.272368 -1.626094  
Cl 0.588257 1.886238 0.000000  
Na -1.626254 2.272368 1.626094  
Cl -3.062484 3.701857 0.000000  
Cl 1.147233 -2.076880 0.000000  
Cl -2.542701 -4.134982 0.000000  
Na -0.050895 -4.346648 0.000000

A8a

Cl -2.611395 2.611395 1.503163  
Na -0.000000 2.892855 1.173729  
Cl -0.000000 3.693071 -1.503163  
Na -2.045557 2.045557 -1.173729

Cl -2.611395 -2.611395 1.503163  
Na -2.045557 -2.045557 -1.173729  
Cl 0.000000 0.000000 0.000000  
Na 2.045557 2.045557 -1.173729  
Cl 2.611395 2.611395 1.503163  
Na 2.892855 -0.000000 1.173729  
Cl 3.693071 -0.000000 -1.503163  
Na 2.045557 -2.045557 -1.173729  
Cl 0.000000 -3.693071 -1.503163  
Na -0.000000 -2.892855 1.173729  
Cl 2.611395 -2.611395 1.503163  
Cl -3.693071 0.000000 -1.503163  
Na -2.892855 0.000000 1.173729

A8b

Cl 0.000000 0.000000 0.000000  
Na 0.000000 2.635577 0.811298  
Cl -0.656944 1.951707 3.348842  
Na 1.546457 0.488941 2.738534  
Cl -2.832670 -2.043042 1.006839  
Na -0.000000 -2.635577 0.811298  
Cl 2.043042 -2.832670 -1.006839  
Na 2.635577 -0.000000 -0.811298  
Cl 1.951707 0.656944 -3.348842  
Na 0.488941 -1.546457 -2.738534  
Cl -1.951707 -0.656944 -3.348842  
Na -0.488941 1.546457 -2.738534  
Cl -2.043042 2.832670 -1.006839  
Na -2.635577 0.000000 -0.811298  
Cl 2.832670 2.043042 1.006839  
Cl 0.656944 -1.951707 3.348842  
Na -1.546457 -0.488941 2.738534

A8c

Cl 1.558037 -0.767466 -0.695618  
Na 4.236211 -1.080830 -1.981107  
Cl 3.552329 -3.787989 -2.575805  
Na 1.146284 -3.299728 -1.567206  
Cl -1.475507 -2.861370 -1.289013  
Na -1.156930 -0.105031 -0.946907  
Cl -1.628215 -0.242130 1.856333  
Na 0.110893 1.711644 1.538544  
Cl 2.702902 1.744001 1.888778  
Na 2.345208 1.931789 -0.993760  
Cl 4.214061 1.413588 -2.773815  
Na -0.397364 -2.449922 1.150853  
Cl 1.924536 -3.778938 1.383068  
Na 3.191694 -0.880302 1.479204  
Cl -0.387816 2.509994 -0.949925  
Cl 5.473885 -1.780536 0.430754  
Na 4.188300 -3.984163 -0.029594

A8d

Cl -0.196774 1.564446 2.837653  
Na -2.616207 0.313099 2.023762  
Cl -2.510919 -1.729217 3.647716  
Na -0.056552 -1.363417 2.825405  
Cl 2.673618 -1.459422 2.654101  
Na 2.290313 -1.120655 0.000000  
Cl -0.457435 -1.025205 -0.000000  
Na -2.616207 0.313099 -2.023762  
Cl -3.081945 1.963330 -0.000000  
Na -0.281793 1.784476 0.000000  
Cl -0.196774 1.564446 -2.837653  
Na 2.357195 1.154743 -2.567478  
Cl 2.673618 -1.459422 -2.654101  
Na 2.357195 1.154743 2.567478  
Cl 2.716277 1.745592 0.000000  
Cl -2.510919 -1.729217 -3.647716  
Na -0.056552 -1.363417 -2.825405

A8e

Cl -0.239830 0.565265 0.000000  
Na -1.345284 3.066963 0.000000  
Cl 1.128942 3.992763 0.000000  
Na 2.072770 1.919082 1.614598  
Cl 2.072770 -0.453962 -2.869652  
Na -0.217761 -1.392426 -2.031251  
Cl 0.600205 -3.160684 0.000000  
Na -2.066850 -3.434501 0.000000  
Cl -2.835115 -1.969375 2.038038  
Na -3.157632 -0.095205 0.000000  
Cl -3.846734 2.466617 0.000000  
Na 2.566143 -1.007975 0.000000  
Cl 2.072770 -0.453962 2.869652  
Na -0.217761 -1.392426 2.031251  
Cl -2.835115 -1.969375 -2.038038  
Cl 4.072084 1.252799 0.000000  
Na 2.072770 1.919082 -1.614598

#### A8f

Cl 0.164770 0.451292 -0.189207  
Na 0.658687 3.130363 -0.595254  
Cl 3.233199 2.506305 -0.604139  
Na 2.731302 0.047111 -1.702561  
Cl 1.361342 -2.047493 -2.797065  
Na -1.036356 -1.390244 -1.897280  
Cl -1.149166 -2.927951 0.599826  
Na -3.540559 -1.713276 0.455912  
Cl -3.333450 0.314689 2.072538  
Na -2.660688 1.588376 -0.287139  
Cl -1.746913 3.992359 -0.895056  
Na 1.461952 -2.476923 -0.075970  
Cl 3.844559 -1.417574 0.269474  
Na -0.770913 -0.507304 2.295832  
Cl -3.544472 -0.534329 -1.895572  
Na 2.800725 0.715855 1.518961  
Cl 1.400387 0.054846 3.625229

#### A8g

Cl 0.092690 -0.166619 0.000000  
Na 0.848106 -2.756886 1.583102  
Cl 2.702029 -3.660836 0.000000  
Na 0.848106 -2.756886 -1.583102  
Cl -1.469839 -3.317557 0.000000  
Na -1.963916 -1.090457 -1.657584  
Cl -0.352023 3.291954 -2.071008  
Na 1.276764 1.081367 -2.064315  
Cl 3.016724 2.087819 -0.000000  
Na 1.167323 3.924127 -0.000000  
Cl -0.352023 3.291954 2.071008  
Na 1.276764 1.081367 2.064315  
Cl 0.056605 -1.071952 3.506367  
Na -1.963916 -1.090457 1.657584  
Cl 0.056605 -1.071952 -3.506367  
Cl -3.628340 0.278335 0.000000  
Na -1.678441 2.131508 -0.000000

#### A8h

Cl 0.066177 0.568836 -0.000000  
Na 0.327350 1.991512 2.404504  
Cl -2.015052 2.252510 3.391897  
Na -2.501784 0.008029 2.117935  
Cl -0.782526 -2.104803 2.652195  
Na 1.640825 -1.250849 2.130319  
Cl -0.782526 -2.104803 -2.652195  
Na 1.640825 -1.250849 -2.130319  
Cl 2.840588 1.162014 -2.618205  
Na 3.124258 0.666534 -0.000000  
Cl 2.840588 1.162014 2.618205  
Na -1.247296 -2.232506 0.000000  
Cl -3.702639 -1.092059 0.000000  
Na 0.327350 1.991512 -2.404504  
Cl 3.026489 -2.051838 -0.000000

Na -2.501784 0.008029 -2.117935  
Cl -2.015052 2.252510 -3.391897

#### A8i

Cl 1.037954 -1.945412 -1.411962  
Na 3.644672 -1.790468 -0.881635  
Cl 3.568655 -1.492394 1.720395  
Na 0.890331 -1.789310 1.383314  
Cl -1.680033 -2.548668 1.494866  
Na -2.140435 -0.099517 2.282427  
Cl 0.408345 0.746766 2.312277  
Na 2.929288 1.137783 0.901925  
Cl 4.061744 0.618032 -1.694485  
Na 1.361429 0.936864 -1.951083  
Cl 1.629241 3.189575 -0.356252  
Na -0.771769 2.439994 0.480115  
Cl -3.398905 2.067054 1.379253  
Na -1.779490 -1.790089 -1.179089  
Cl -1.364928 0.994857 -1.789226  
Cl -4.403665 -1.563339 -1.705621  
Na -3.915201 0.852013 -0.957535

#### A8j

Cl -0.079683 0.613255 -0.004669  
Na -0.380771 3.337491 0.014595  
Cl -2.982143 2.884367 0.004183  
Na -2.760890 0.609332 1.607740  
Cl -1.574969 -1.454512 2.851311  
Na 0.879805 -1.101636 2.025216  
Cl 1.080748 -3.033129 0.001040  
Na 3.520686 -1.919792 0.012858  
Cl 3.446435 -0.270009 -2.027922  
Na 2.767771 1.511111 0.007003  
Cl 2.081987 4.074410 0.013848  
Na -1.720704 -2.172790 -0.011057  
Cl -4.150760 -0.958741 -0.020836  
Na -2.729649 0.618586 -1.618159  
Cl 3.428404 -0.267491 2.049643  
Cl -1.551819 -1.448836 -2.869546  
Na 0.898052 -1.105112 -2.029285

#### A8k

Cl -0.000000 -0.000000 1.502330  
Na -0.000000 1.785101 3.590962  
Cl -0.000000 3.598358 1.692404  
Na -1.596012 1.926070 0.059777  
Cl -3.258081 0.000000 -0.865244  
Na -1.596012 -1.926070 0.059777  
Cl 0.000000 -2.130339 -2.059047  
Na 1.596012 -1.926070 0.059777  
Cl 3.258081 -0.000000 -0.865244  
Na -0.000000 -1.785101 3.590962  
Cl -0.000000 -0.000000 5.492171  
Na -1.541203 0.000000 -3.119823  
Cl 0.000000 2.130339 -2.059047  
Na 1.596012 1.926070 0.059777  
Cl -0.000000 -3.598358 1.692404  
Cl 0.000000 0.000000 -5.295155  
Na 1.541203 -0.000000 -3.119823

#### A8l

Cl 1.920173 0.023878 1.606900  
Na 2.009363 2.162011 -0.154811  
Cl 0.007455 1.740956 -2.139258  
Na -2.333832 0.123698 -1.885659  
Cl -0.792190 -1.944099 -1.070830  
Na -3.086769 -1.490524 0.584110  
Cl -4.588879 -1.255508 -1.619237  
Na 4.094841 -0.948897 0.386549  
Cl 3.897126 0.809670 -1.553141  
Na 1.568100 -0.785784 -1.600231  
Cl 2.853229 -3.105475 -0.317866

Na 0.620572 -2.419961 1.173189  
Cl -1.464016 -1.707470 2.784102  
Na -0.653712 0.853097 2.089294  
Cl 0.454890 3.576700 1.533862  
Cl -2.882551 1.397897 0.611675  
Na -1.299383 3.222603 -0.339305

#### A8m

Cl 1.409408 -1.455378 -1.822283  
Na 0.000000 -3.658902 -0.759288  
Cl -1.721696 -3.843508 -2.732766  
Na -1.389747 -1.258527 -2.208268  
Cl -1.409408 1.455378 -1.822283  
Na -1.347908 1.043296 0.882903  
Cl -1.731044 -1.627927 0.581457  
Na -0.725957 -2.460626 2.871678  
Cl 1.266504 -3.701831 1.690288  
Na 1.347908 -1.043296 0.882903  
Cl -0.000000 -0.000000 3.548106  
Na 0.725957 2.460626 2.871678  
Cl -1.266504 3.701831 1.690288  
Na 1.389747 1.258527 -2.208268  
Cl 1.731044 1.627927 0.581457  
Cl 1.721696 3.843508 -2.732766  
Na 0.000000 3.658902 -0.759288

#### A8n

Cl -1.503662 -0.000401 0.005505  
Na -3.587160 1.787413 0.000878  
Cl -1.689214 3.600680 -0.001944  
Na -0.060510 1.928000 -1.596291  
Cl 0.857950 -0.001653 -3.258270  
Na -0.066107 -1.926063 -1.593021  
Cl 2.058690 -2.134208 -0.003226  
Na -0.055649 -1.926156 1.598605  
Cl 0.873937 0.000898 3.256417  
Na -3.597615 -1.787648 0.017872  
Cl -5.490990 0.005849 0.008197  
Na 3.113905 -0.004646 -1.547966  
Cl 2.061456 2.130634 -0.003773  
Na -0.056357 1.925138 1.594913  
Cl -1.694752 -3.596749 0.010281  
Cl 5.294633 -0.003510 -0.013827  
Na 3.123275 0.000356 1.533860

#### A8o

Na 2.674381 -1.926556 0.357801  
Cl 5.010940 -0.982724 -0.418252  
Na 3.900057 1.256507 -1.092517  
Cl 1.215755 0.417489 -0.719769  
Na -0.635667 -1.480973 -1.646752  
Cl 0.693191 -3.595359 -0.603443  
Na -0.491709 -2.935396 1.612567  
Cl 1.410093 -1.652312 2.876625  
Na 0.187355 0.438844 1.807008  
Cl -2.165689 -0.886025 0.935243  
Na -4.182467 -0.514690 -1.131231  
Cl -2.788411 -1.322209 -3.132939  
Cl -5.400752 1.431236 0.112156  
Na -3.104519 1.751196 1.229091  
Cl -0.786004 2.954901 1.696094  
Cl 3.276585 3.809032 -1.235342  
Na 0.932838 3.142116 -0.379272

#### A8p

Cl 0.000000 0.000000 0.922739  
Na 0.000000 1.796537 3.478232  
Cl 0.000000 0.000000 5.316813  
Na -0.000000 -3.002365 0.188760  
Cl 2.061025 -2.674267 -1.587115  
Na 1.796044 -0.000000 -1.387538  
Cl -0.000000 -0.000000 -3.700093

Na 0.000000 2.589972 -3.209572  
Cl -2.061025 2.674267 -1.587115  
Na 0.000000 3.002365 0.188760  
Cl 0.000000 4.163266 2.506342  
Na -0.000000 -2.589972 -3.209572  
Cl -2.061025 -2.674267 -1.587115  
Na -1.796044 0.000000 -1.387538  
Cl 2.061025 2.674267 -1.587115  
Na -0.000000 -1.796537 3.478232  
Cl -0.000000 -4.163266 2.506342

#### A8q

Cl -1.298012 2.579153 0.000000  
Na -2.918647 0.471957 0.000000  
Cl -3.202354 -0.204454 2.538708  
Na -0.600395 0.994896 2.478942  
Cl 1.946209 1.916012 2.398025  
Na 2.296999 -0.765514 1.918210  
Cl -0.349229 -1.115540 0.000000  
Na -1.396873 -2.104659 -2.315977  
Cl -3.202354 -0.204454 -2.538708  
Na -0.600395 0.994896 -2.478942  
Cl 0.504280 -1.368282 -3.856151  
Na 2.296999 -0.765514 -1.918210  
Cl 3.761638 -1.782927 -0.000000  
Na 1.375426 2.711044 -0.000000  
Cl 1.946209 1.916012 -2.398025  
Cl 0.504280 -1.368282 3.856151  
Na -1.396873 -2.104659 2.315977

#### A8s

Cl 1.244070 0.645475 0.033909  
Na 2.940864 2.771093 -0.184334  
Cl 0.987889 4.518092 0.188026  
Na -0.684801 2.476719 0.554993  
Cl -1.722643 0.857675 2.540387  
Na 0.275392 -0.913008 2.020856  
Cl -1.323446 -2.518645 0.260489  
Na 1.110132 -3.592461 -0.063865  
Cl 1.934410 -2.439863 -2.261466  
Na 3.452099 -0.929279 -0.314601  
Cl 5.034380 1.215480 -0.547680  
Na -3.171945 -0.521116 0.759898  
Cl -2.213853 1.089757 -1.596935  
Na -0.189152 -0.839553 -1.664292  
Cl 2.495476 -2.530222 1.871786  
Cl -5.770620 -0.450909 -0.017806  
Na -4.761340 0.949763 -1.836115

#### A8t

Na 3.510383 1.070180 0.592431  
Cl 5.214262 -0.998881 0.864456  
Na 3.107082 -2.440173 0.380579  
Cl 1.368720 -0.563642 1.241757  
Na -0.366187 1.464116 1.555050  
Cl 1.677449 3.269948 1.181683  
Na 1.161777 2.861252 -1.339773  
Cl 2.993995 1.211097 -2.171691

Na 1.114245 -0.604885 -1.633954  
Cl -0.968066 1.204836 -1.328944  
Na -4.404756 -0.492692 1.194628  
Cl -2.179654 -0.262025 2.585736  
Cl -3.376102 -2.145505 -0.691989  
Na -0.993463 -1.922248 0.588165  
Cl 0.996214 -3.226818 -1.119796  
Cl -5.492199 1.337729 -0.343301  
Na -3.491673 0.332215 -1.673899

#### A8u

Cl -1.449246 0.623034 -1.130940  
Na -2.443817 3.023900 -0.354409  
Cl -0.425050 4.495450 -1.043743  
Na 0.843718 2.147821 -1.294804  
Cl 1.446781 1.272246 1.374950  
Na 3.036817 -0.922882 -0.297430  
Cl 1.453924 -3.116811 -0.361049  
Na -0.030150 -1.533128 -2.052333  
Cl -2.493020 -2.940123 -1.539024  
Na -0.962858 -3.449297 0.576575  
Cl -2.092077 -1.897439 2.360219  
Na -3.371345 -0.915701 0.117538  
Cl -3.734202 1.603192 1.473914  
Na -1.158253 0.541704 -1.742274  
Cl 2.100013 0.153385 -2.599050  
Na 3.868146 1.340854 2.190383  
Cl 5.333770 -0.343875 1.058503

## 6.5 Structures Neutral Clusters: B3LYP-D3/aug-cc-pVDZ

#### N1a

Na 0.000000 0.000000 -1.450473  
Cl 0.000000 0.000000 0.938541

#### N2a

Na 0.000000 1.604474 0.000000  
Cl -0.000000 -0.000000 2.002027  
Na -0.000000 -1.604474 0.000000  
Cl 0.000000 -0.000000 -2.002027

#### N3a

Na 0.000000 2.319280 -0.000000  
Cl 2.358237 1.361529 -0.000000  
Na 2.008556 -1.159640 0.000000  
Cl -2.358237 1.361529 -0.000000  
Na -2.008556 -1.159640 0.000000  
Cl -0.000000 -2.723058 -0.000000

#### N3b

Na 0.000000 1.473273 0.676710  
Cl 1.830544 -0.000000 -0.942481  
Na -0.000000 -1.473273 0.676710  
Cl -1.830544 0.000000 -0.942481  
Na 0.000000 -0.000000 -2.718573  
Cl -0.000000 0.000000 2.768297

#### N4a

Na 1.241580 1.241580 1.241580  
Cl 1.427410 -1.427410 1.427410  
Na -1.241580 -1.241580 1.241580  
Cl -1.427410 1.427410 1.427410  
Na -1.241580 1.241580 -1.241580  
Cl -1.427410 -1.427410 -1.427410  
Cl 1.427410 1.427410 -1.427410  
Na 1.241580 -1.241580 -1.241580

#### N4b

Cl 2.466692 2.466692 -0.000000  
Na 0.000000 3.038193 0.000000

Cl -2.466692 2.466692 -0.000000  
Na -3.038193 0.000000 0.000000  
Cl -2.466692 -2.466692 -0.000000  
Na -0.000000 -3.038193 0.000000  
Cl 2.466692 -2.466692 -0.000000  
Na 3.038193 -0.000000 0.000000

#### N4c

Na -0.126338 -1.833101 1.495014  
Cl 0.607600 -3.778214 0.000000  
Na -0.126338 -1.833101 -1.495014  
Cl -2.179699 -0.785166 0.000000  
Na -1.262475 1.643979 0.000000  
Cl 1.358731 0.184866 0.000000  
Cl -0.126338 3.962466 0.000000  
Na 2.040150 2.665207 0.000000

#### N4d

Cl -0.064560 -1.791912 1.823009  
Na 1.014984 0.157832 0.000000  
Cl 2.254388 2.420831 0.000000  
Na -0.064560 3.416418 0.000000  
Cl -1.915114 1.665052 0.000000  
Na -1.917574 -0.906053 0.000000  
Cl -0.064560 -1.791912 -1.823009  
Na 0.642368 -3.444107 0.000000

#### N4e

Na 0.000000 1.656797 0.376710  
Cl 0.000000 2.289103 -2.095935  
Na 0.000000 0.000000 -3.199002  
Cl -0.000000 -2.289103 -2.095935  
Na -0.000000 -1.656797 0.376710  
Cl -1.803459 0.000000 1.734948  
Cl 1.803459 -0.000000 1.734948  
Na 0.000000 -0.000000 3.561361

#### N4f

Cl 0.520052 -1.988336 2.308006

Na -0.498814 -2.522633 0.000000  
Cl 0.520052 -1.988336 -2.308006  
Na 0.520052 0.475603 -1.738906  
Cl -1.787678 0.519131 -0.000000  
Na 0.520052 0.475603 1.738906  
Cl 1.239503 2.515082 -0.000000  
Na -1.301547 3.027955 -0.000000

#### N4g

Cl 0.000000 -0.000000 -1.394634  
Na 0.000000 2.440559 -2.204412  
Cl 0.000000 4.001374 -0.246489  
Na 0.000000 1.982973 1.372750  
Cl 0.000000 0.000000 2.963879  
Na -0.000000 -1.982973 1.372750  
Cl -0.000000 -4.001374 -0.246489  
Na -0.000000 -2.440559 -2.204412

#### N4h

Na -0.000000 0.000000 -1.220119  
Cl -0.000000 2.523214 -1.855947  
Na 1.683599 3.009378 -0.070594  
Cl 2.019302 0.976253 1.450204  
Na 0.000000 -0.000000 2.615422  
Cl -2.019302 -0.976253 1.450204  
Na -1.683599 -3.009378 -0.070594  
Cl 0.000000 -2.523214 -1.855947

#### N5a

Na -0.784148 1.789395 1.786713  
Cl 1.256354 1.453528 0.000000  
Na 1.740540 -0.951859 -1.684511  
Cl -0.784148 -0.779445 -2.431546  
Na -0.784148 1.789395 -1.786713  
Cl -2.703096 1.861674 -0.000000  
Na -1.965453 -0.782644 -0.000000  
Cl -0.784148 -0.779445 2.431546  
Na 1.740540 -0.951859 1.684511  
Cl 3.049118 -2.333764 0.000000



N5b  
Na 0.796130 1.328002 1.701888  
Cl -1.041458 2.341329 0.000000  
Na 0.796130 1.328002 -1.701888  
Cl 0.796130 -1.307190 -1.962713  
Na -0.920452 -2.028329 0.000000  
Cl 0.796130 -1.307190 1.962713  
Na 2.608059 -1.109521 0.000000  
Cl 2.852998 1.529376 0.000000  
Cl -3.463795 -1.549586 0.000000  
Na -3.187150 0.935069 0.000000

N5c  
Na 0.000000 0.000000 -1.545671  
Cl 0.000000 2.760424 -0.810618  
Na -1.862445 -1.838417 0.740221  
Cl 0.000000 0.000000 1.970172  
Na 1.862445 1.838417 0.740221  
Cl 3.019319 -0.000000 -0.632331  
Na 1.862445 -1.838417 0.740221  
Cl -3.019319 0.000000 -0.632331  
Na -1.862445 1.838417 0.740221  
Cl -0.000000 -2.760424 -0.810618

N5d  
Na -0.870116 -0.939423 2.454120  
Cl -1.720947 -0.610013 -0.000000  
Na -0.870116 -0.939423 -2.454120  
Cl 0.321592 -1.745146 -4.607638  
Na 1.353748 0.555003 -4.576126  
Cl 0.321592 1.746485 -2.545147  
Na -0.295643 1.707450 0.000000  
Cl 0.321592 1.746485 2.545147  
Na 1.353748 0.555003 4.576126  
Cl 0.321592 -1.745146 4.607638

N5e  
Na -2.471576 -0.787350 1.356884  
Cl -0.497559 -0.885537 -0.524251  
Na 2.101145 -1.183131 -0.528368  
Cl 2.571943 1.729520 -0.330453  
Na -0.026874 1.773140 -0.071481  
Cl -2.543001 1.976646 0.568569  
Na -3.583750 0.345265 -1.251962  
Cl -4.559622 -1.577793 0.087678  
Na 4.805385 0.702051 0.433737  
Cl 4.494849 -1.792820 0.238050

N5f  
Cl 2.501296 3.442739 0.000000  
Na 0.000000 3.813479 -0.000000  
Cl -2.501296 3.442739 -0.000000  
Na -3.626834 1.178430 -0.000000  
Cl -4.047182 -1.315009 0.000000  
Na -2.241507 -3.085170 -0.000000  
Cl -0.000000 -4.255459 0.000000  
Na 2.241507 -3.085170 -0.000000  
Cl 4.047182 -1.315009 0.000000  
Na 3.626834 1.178430 -0.000000

N6a  
Cl 0.000000 -0.000000 2.165804  
Na 0.000000 1.960578 -0.000000  
Cl -2.713484 2.030330 -0.000000  
Na -2.615664 0.000000 -1.721877  
Cl 0.000000 -0.000000 -2.165804  
Na 2.615664 -0.000000 -1.721877  
Cl 2.713484 2.030330 0.000000  
Na 2.615664 0.000000 1.721877  
Cl 2.713484 -2.030330 -0.000000  
Na -0.000000 -1.960578 -0.000000

Cl -2.713484 -2.030330 -0.000000  
Na -2.615664 -0.000000 1.721877

N6b  
Na 0.000000 2.474170 1.262056  
Cl 0.000000 2.742634 -1.457361  
Na 2.142694 1.237085 -1.262056  
Cl 2.375191 1.371317 1.457361  
Na 2.142694 -1.237085 1.262056  
Cl -0.000000 -2.742634 1.457361  
Na -2.142694 -1.237085 1.262056  
Cl -2.375191 1.371317 1.457361  
Na -2.142694 1.237085 -1.262056  
Cl -2.375191 -1.371317 -1.457361  
Na -0.000000 -2.474170 -1.262056  
Cl 2.375191 -1.371317 -1.457361

N6d  
Na 1.223268 1.640726 0.707232  
Cl -0.749260 2.938157 -0.424444  
Na -2.534201 1.710596 0.959993  
Cl -0.703631 -0.110834 1.970776  
Cl -3.578423 -0.099968 -0.642400  
Na -2.359853 -1.977967 0.720165  
Na -1.024668 0.116274 -1.666424  
Cl -0.426028 -2.899361 -0.707192  
Na 1.286424 -1.644795 0.797836  
Cl 3.392115 -0.021231 1.404161  
Na 4.043421 0.031629 -1.083139  
Cl 1.654739 0.273173 -1.882801

N6e  
Na -0.056066 1.373067 1.684285  
Cl 1.937172 2.058300 0.000000  
Na 1.826880 -1.617346 0.000000  
Cl -0.056066 -1.216764 1.920242  
Na -1.837728 -1.878394 0.000000  
Cl -4.383689 -1.407303 0.000000  
Na -4.100847 1.074710 0.000000  
Cl -1.899349 2.392307 0.000000  
Na -0.056066 1.373067 -1.684285  
Cl -0.056066 -1.216764 -1.920242  
Cl 4.419434 -1.476891 0.000000  
Na 4.283426 1.014983 0.000000

N6f  
Cl 0.352272 1.387783 0.000000  
Na -1.611232 0.741148 1.770089  
Cl -3.582704 1.048152 0.000000  
Na -1.611232 0.741148 -1.770089  
Cl -1.611232 -1.856759 -1.980041  
Na -3.375987 -1.656218 0.000000  
Cl -1.611232 -1.856759 1.980041  
Na 0.258931 -2.225259 0.000000  
Cl 2.823858 -2.231849 0.000000  
Na 3.495563 0.200459 0.000000  
Cl 4.251337 2.686843 0.000000  
Na 1.882220 3.469997 0.000000

N6g  
Cl 1.446823 -1.363292 -0.025747  
Na 1.283756 1.253277 -0.022685  
Cl 1.738437 3.832807 -0.009383  
Na -1.181158 3.971478 -0.003600  
Cl -1.446823 1.363292 -0.025747  
Na -1.283756 -1.253277 -0.022685  
Cl -1.738437 -3.832807 -0.009383  
Na -1.256866 -6.360568 0.029348  
Cl 1.256866 -6.560565 0.033148  
Na 1.181158 -3.971478 -0.003600  
Cl -1.256866 6.560565 0.033148  
Na 1.256866 6.360568 0.029348

N6h  
Cl 1.420057 3.822238 -0.754428  
Na 2.944637 1.951024 0.117505  
Cl 4.507319 0.002376 0.611608  
Na 2.949430 -1.949568 0.115645  
Cl 1.424268 -3.820679 -0.755111  
Na -0.699683 -2.461208 -0.551280  
Cl -3.208093 -2.001521 0.294728  
Na -4.309789 -0.002454 -0.878157  
Cl -3.210788 1.998885 0.293437  
Na -0.702404 2.459940 -0.553636  
Cl 0.256379 0.000274 0.349682  
Na -2.019957 -0.000163 1.688237

N6i  
Cl 2.080986 0.137872 0.000000  
Na 4.366491 -0.994310 0.000000  
Cl 5.549572 -3.227461 0.000000  
Na 3.516022 -4.770020 -0.000000  
Cl 1.034108 -4.356146 -0.000000  
Na 0.212955 -1.922854 -0.000000  
Cl -1.815633 -0.209186 -0.000000  
Na -3.664343 1.638432 -0.000000  
Cl -1.591708 3.833845 0.000000  
Na -0.000000 1.766802 0.000000  
Cl -5.638949 3.307676 -0.000000  
Na -3.841343 5.075387 0.000000

N6j  
Cl 0.000000 0.000000 -0.077569  
Na 0.000000 2.288441 -1.397734  
Cl 0.940184 4.295083 -2.727365  
Na 0.065778 5.603977 -0.752968  
Cl -1.064669 3.804910 0.718271  
Na -0.722589 1.681118 2.223533  
Cl 1.064669 -3.804910 0.718271  
Na -0.065778 -5.603977 -0.752968  
Cl -0.940184 -4.295083 -2.727365  
Na -0.000000 -2.288441 -1.397734  
Na 0.722589 -1.681118 2.223533  
Cl -0.000000 -0.000000 4.001505

N6k  
Cl -2.063616 -0.407715 -0.000000  
Na -0.298807 -2.374994 -0.000000  
Cl 0.878024 -4.638124 -0.000000  
Na 3.282400 -3.825599 -0.000000  
Cl 1.903841 -0.515854 -0.000000  
Na -0.000000 1.299739 0.000000  
Cl -1.257674 3.578755 0.000000  
Na -3.317203 5.119928 0.000000  
Cl -5.343282 3.620444 0.000000  
Na -3.639142 1.682417 0.000000  
Na 4.465848 -0.371494 -0.000000  
Cl 5.563645 -2.627505 -0.000000

N6l  
Na -3.307463 -0.791744 1.529115  
Cl -5.545997 -1.644462 0.600495  
Na -4.821823 0.285944 -0.883894  
Cl -3.554739 1.949412 0.763582  
Na -1.169147 1.811283 -0.270159  
Cl 1.307865 1.733758 -1.092340  
Na 3.704844 1.111316 -0.227826  
Cl 3.348008 -1.724899 -0.810741  
Na 0.882181 -0.972503 -1.249694  
Cl -1.663580 -0.877446 -0.652797  
Cl 5.714787 0.732562 1.358340  
Na 5.319788 -1.705362 0.845081

N6m

Na 0.000000 1.894514 -0.000000  
Cl 0.555569 4.400731 -0.000000  
Na 3.043562 4.817093 -0.000000  
Cl 5.173227 3.411559 -0.000000  
Na 4.217843 1.069842 -0.000000  
Cl 1.920285 -0.031418 -0.000000  
Na -0.000423 -1.897055 0.000000  
Cl -5.172873 -3.409570 0.000000  
Na -4.221008 -1.066664 0.000000  
Cl -1.920065 0.029353 0.000000  
Na -3.043107 -4.813559 0.000000  
Cl -0.554116 -4.403353 0.000000

#### N6n

Cl -2.251552 -0.114104 0.000000  
Na -4.232643 1.503184 0.000000  
Cl -4.576306 4.006973 0.000000  
Na -2.201952 4.936276 0.000000  
Cl 0.131267 3.960091 0.000000  
Na 0.000000 1.399477 0.000000  
Cl 1.596890 -0.716729 0.000000  
Na 2.682798 -4.017102 0.000000  
Cl 0.216558 -4.669333 0.000000  
Na -0.693784 -2.287803 0.000000  
Cl 5.063087 -3.023518 0.000000  
Na 4.167486 -0.673801 0.000000

#### N6o

Cl 2.514890 4.355918 -0.000000  
Na -0.000000 4.608656 -0.000000  
Cl -2.514890 4.355918 -0.000000  
Na -3.991214 2.304328 -0.000000  
Cl -5.029781 0.000000 -0.000000  
Na -3.991214 -2.304328 -0.000000  
Cl -2.514890 -4.355918 -0.000000  
Na -0.000000 -4.608656 -0.000000  
Cl 2.514890 -4.355918 -0.000000  
Na 3.991214 -2.304328 -0.000000  
Cl 5.029781 -0.000000 -0.000000  
Na 3.991214 2.304328 -0.000000

#### N7a

Na 0.000000 2.344056 -1.277277  
Cl -1.996063 1.152427 -2.588535  
Na -2.030012 -1.172028 -1.277277  
Cl -2.312645 -1.335206 1.292262  
Na -1.746910 1.008579 2.435779  
Cl 0.000000 2.670412 1.292262  
Na 1.746910 1.008579 2.435779  
Cl 0.000000 0.000000 4.180324  
Na -0.000000 -2.017158 2.435779  
Cl -0.000000 -2.304855 -2.588535  
Na 0.000000 0.000000 -3.926015  
Cl 1.996063 1.152427 -2.588535  
Na 2.030012 -1.172028 -1.277277  
Cl 2.312645 -1.335206 1.292262

#### N7b

Cl -2.221730 -1.546164 -0.000000  
Na -0.663254 -3.762922 -0.000000  
Cl 0.934890 -3.082105 2.019879  
Na -0.517514 -0.853763 2.088877  
Cl -1.354126 1.635211 2.472795  
Na -2.270657 1.213996 0.000000  
Cl -1.354126 1.635211 -2.472795  
Na 0.934890 2.741832 -1.732318  
Cl 1.332071 0.456415 0.000000  
Na 2.320968 -2.019037 -0.000000  
Cl 0.934890 -3.082105 -2.019879  
Na -0.517514 -0.853763 -2.088877  
Na 0.934890 2.741832 1.732318  
Cl 1.584609 4.495894 0.000000

#### N7c

Cl 1.714224 0.202016 -0.000000  
Na 1.634160 2.280162 1.866045  
Cl -0.797764 1.778394 2.672841  
Na -0.797764 -0.764094 2.126718  
Cl 0.268048 -3.203612 2.020098  
Na 1.825715 -2.451452 0.000000  
Cl 0.268048 -3.203612 -2.020098  
Na -1.461978 -3.484697 0.000000  
Cl -2.409744 -0.970365 0.000000  
Na -1.196695 2.273157 -0.000000  
Cl 1.211532 4.026984 -0.000000  
Na 1.634160 2.280162 -1.866045  
Cl -0.797764 1.778394 -2.672841  
Na -0.797764 -0.764094 -2.126718

#### N7d

Cl 0.326600 0.207322 1.993762  
Na 0.326600 -2.428599 1.680470  
Cl 2.375582 -2.676925 0.000000  
Na 2.430630 -0.043755 0.000000  
Cl 3.125376 2.501492 0.000000  
Na 1.105435 2.803590 1.728858  
Cl -0.702521 3.616633 0.000000  
Na 1.105435 2.803590 -1.728858  
Cl 0.326600 0.207322 -1.993762  
Na 0.326600 -2.428599 -1.680470  
Cl -1.423417 -3.595260 0.000000  
Na -1.620899 1.063373 0.000000  
Cl -4.042251 0.109245 0.000000  
Na -3.652121 -2.341155 0.000000

#### N7e

Na 1.074493 -3.136892 0.000000  
Cl -0.602863 -3.091488 2.034363  
Na -2.339320 -3.029431 0.000000  
Cl -0.602863 -3.091488 -2.034363  
Na -0.602863 -0.350108 -1.937313  
Cl -2.775178 -0.437542 0.000000  
Na -0.602863 -0.350108 1.937313  
Cl 1.658242 -0.542541 0.000000  
Na 3.887732 0.749663 0.000000  
Cl 3.644382 3.223026 0.000000  
Na 1.056757 2.874946 0.000000  
Cl -0.682936 2.311837 -2.004346  
Na -2.405703 2.185394 0.000000  
Cl -0.682936 2.311837 2.004346

#### N7f

Cl 1.269635 0.750943 2.172102  
Na -1.354074 0.384612 1.954604  
Cl -1.354074 -2.217142 2.310396  
Na -1.047894 -3.425161 0.000000  
Cl 1.686647 -3.438472 0.000000  
Na 1.340347 -1.864223 2.076825  
Na 1.340347 -1.864223 -2.076825  
Cl 1.269635 0.750943 -2.172102  
Na 1.913479 2.129916 -0.000000  
Cl -1.354074 -2.217142 -2.310396  
Na -1.354074 0.384612 -1.954604  
Cl -2.459153 1.826540 0.000000  
Cl 1.199864 4.635788 -0.000000  
Na -1.237599 4.113124 -0.000000

#### N7g

Na -1.923501 -1.493241 -1.890182  
Cl -2.566478 1.045468 -2.238531  
Na -3.488451 0.772449 0.329359  
Cl -1.855708 2.534727 1.401593  
Na 0.394777 1.369582 2.100183  
Cl 1.043741 -1.112162 2.424879

Na 2.317676 -1.344341 -0.031596  
Cl 1.704276 2.100463 -0.195117  
Na -0.754556 2.512911 -1.072117  
Cl -3.280892 -1.825168 0.470226  
Na -0.872595 -2.506838 1.286168  
Cl 0.277838 -2.658564 -1.141516  
Na 4.181665 1.685815 -0.767401  
Cl 4.771037 -0.729454 -0.692037

#### N7h

Cl 1.555366 -2.461933 0.000000  
Na 0.882855 -1.693857 2.473729  
Cl -1.757990 -2.106827 2.383351  
Na -1.196116 -3.004217 0.000000  
Cl -1.757990 -2.106827 -2.383351  
Na 0.882855 -1.693857 -2.473729  
Cl 0.850199 0.898108 -2.282736  
Na -1.757990 0.545460 -1.996989  
Cl -2.279807 2.186066 -0.000000  
Na -1.757990 0.545460 1.996989  
Cl 0.850199 0.898108 2.282736  
Na 2.370407 0.891142 -0.000000  
Cl 2.764870 3.456616 -0.000000  
Na 0.228491 3.230208 -0.000000

#### N7i

Na -1.434224 -2.742509 0.000000  
Cl -0.603297 -2.038756 2.394253  
Na -2.380357 -0.049557 2.104748  
Cl -3.617714 -1.010680 0.000000  
Na -2.380357 -0.049557 -2.104748  
Cl -0.603297 -2.038756 -2.394253  
Na 1.192431 -0.145425 -1.868592  
Cl -0.603297 1.876387 -2.233065  
Na 0.141792 3.008450 0.000000  
Cl -0.603297 1.876387 2.233065  
Na 1.192431 -0.145425 1.868592  
Cl 2.799160 -1.348012 -0.000000  
Na 4.469183 0.581999 -0.000000  
Cl 2.713514 2.387092 -0.000000

#### N7j

Na -1.319602 2.626174 0.941215  
Cl -3.340004 0.928711 1.557921  
Na -0.352492 0.473491 -1.920695  
Cl -2.213738 -1.457007 -1.500240  
Na 0.112338 -2.939683 -1.193655  
Cl 1.756195 -1.018290 -1.892551  
Na 2.531811 -1.100697 0.897168  
Cl 0.455786 -3.025868 1.385351  
Na -1.252625 -1.023726 1.732341  
Cl -0.156896 3.028179 -1.414598  
Na 2.334697 1.948271 -0.376011  
Cl 0.538664 0.880833 1.522323  
Cl 4.346673 0.756960 0.667575  
Na -4.197179 -0.128357 -0.583842

#### N7k

Na 0.000000 0.000000 -0.554080  
Cl 2.111908 1.219310 -1.782304  
Na 0.000000 2.849389 -1.729384  
Cl 0.000000 2.885709 0.894719  
Na 1.970250 1.137524 1.675961  
Cl 2.499098 -1.442855 0.894719  
Na 2.467643 -1.424694 -1.729384  
Cl -0.000000 -2.438621 -1.782304  
Na -2.467643 -1.424694 -1.729384  
Cl -2.111908 1.219310 -1.782304  
Cl -2.499098 -1.442855 0.894719  
Na -0.000000 -2.275049 1.675961  
Cl 0.000000 0.000000 3.124982  
Na -1.970250 1.137524 1.675961

N7l  
Cl 0.000000 0.000000 1.601667  
Na 0.000000 2.606592 1.317440  
Cl 0.000000 5.200902 1.672887  
Na 0.000000 5.223980 -1.260490  
Cl 0.000000 2.606716 -1.411111  
Na -0.000000 -0.000000 -1.150966  
Cl -0.000000 -2.606716 -1.411111  
Na -0.000000 -5.223980 -1.260490  
Cl 0.000000 -7.807828 -1.431292  
Na 0.000000 -7.706298 1.088316  
Cl -0.000000 -5.200902 1.672887  
Na -0.000000 -2.606592 1.317440  
Cl 0.000000 7.807828 -1.431292  
Na 0.000000 7.706298 1.088316

N7m  
Cl 1.084575 0.306330 -0.503701  
Na 3.043240 -1.444391 -0.280750  
Cl 4.618766 -3.494157 -0.314675  
Na 6.290322 -1.812814 0.559789  
Cl 4.927387 0.378011 0.709065  
Na -0.465903 2.984154 -0.378193  
Cl -2.630713 1.760442 -1.181940  
Na -4.720274 0.442748 -0.282278  
Cl -6.567369 -0.499579 1.261383  
Na -5.293503 -2.666154 1.047276  
Cl -3.344639 -2.152771 -0.554676  
Na -1.323146 -0.591785 -1.064124  
Na 3.041019 2.206536 0.516335  
Cl 1.542034 4.272240 0.508155

N8a  
Cl 0.000000 2.126810 1.316061  
Na 0.000000 1.919225 -1.368002  
Cl -2.126810 0.000000 -1.316061  
Na -1.919225 0.000000 1.368002  
Cl -2.021672 0.000000 4.070993  
Na 0.000000 1.732443 3.951308  
Cl 2.021672 0.000000 4.070993  
Na -0.000000 -1.732443 3.951308  
Cl -0.000000 -2.126810 1.316061  
Na -0.000000 -1.919225 -1.368002  
Cl 2.126810 -0.000000 -1.316061  
Na 1.919225 -0.000000 1.368002  
Cl -0.000000 -2.021672 -4.070993  
Na 1.732443 -0.000000 -3.951308  
Cl 0.000000 2.021672 -4.070993  
Na -1.732443 0.000000 -3.951308

N8b  
Na 1.636036 -1.059827 1.912255  
Cl 0.006210 -1.471289 4.014273  
Na -0.602552 1.126055 3.820754  
Cl -0.482606 -1.763374 0.000000  
Na 1.636036 -1.059827 -1.912255  
Cl 3.502189 -0.860440 -0.000000  
Na 2.909205 1.717902 -0.000000  
Cl 1.177752 1.790688 1.978301  
Na -1.097867 1.421120 0.000000  
Cl -2.686216 0.949650 -2.213047  
Na -1.950802 -1.569503 -2.225659  
Cl 0.006210 -1.471289 -4.014273  
Na -0.602552 1.126055 -3.820754  
Cl 1.177752 1.790688 -1.978301  
Cl -2.686216 0.949650 2.213047  
Na -1.950802 -1.569503 2.225659

N8c  
Cl -2.961053 0.643841 -1.214341  
Na 1.022628 -2.510142 -1.282920

Cl 0.117331 -1.993182 -3.685423  
Na -1.760553 -0.177457 -3.400327  
Cl -0.117331 1.993182 -3.685423  
Na -1.022628 2.510142 -1.282920  
Cl 0.081983 2.171975 1.057264  
Na 2.011674 0.240050 1.083237  
Cl 2.961053 -0.643841 -1.214341  
Na 1.760553 0.177457 -3.400327  
Na -2.011674 -0.240050 1.083237  
Cl -0.081983 -2.171975 1.057264  
Na 0.081983 -1.722014 3.680466  
Cl -2.016707 -0.080896 3.790439  
Na -0.081983 1.722014 3.680466  
Cl 2.016707 0.080896 3.790439

N8d  
Cl -1.000546 3.142318 2.023580  
Na -1.982945 1.596499 -0.000000  
Cl -1.000546 3.142318 -2.023580  
Na 0.398797 4.039681 -0.000000  
Cl 1.988919 1.850521 -0.000000  
Na 3.064482 -0.575341 0.000000  
Cl 2.204338 -1.238717 2.407127  
Na 0.571959 0.994622 2.305909  
Cl -1.772341 -0.649456 1.942396  
Na -2.698308 -2.159714 0.000000  
Cl -1.772341 -0.649456 -1.942396  
Na 0.571959 0.994622 -2.305909  
Cl 2.204338 -1.238717 -2.407127  
Na 0.061249 -2.649201 2.016797  
Na 0.061249 -2.649201 -2.016797  
Cl -0.883165 -4.094791 0.000000

N8e  
Cl -1.042410 3.283798 0.687185  
Na -2.475773 1.887798 -0.962128  
Cl -4.093421 -0.203980 -0.901347  
Na -0.565406 1.584599 2.664690  
Cl 1.863129 0.891650 1.836242  
Na 1.178364 2.210281 -0.543144  
Cl -0.456058 0.742402 -2.441270  
Na -2.159353 -1.271697 -2.373724  
Cl -0.876291 -2.646559 -0.571103  
Na -2.855851 -1.617312 0.979681  
Cl -1.428337 -0.879340 3.020293  
Na 0.750069 -1.720087 1.512527  
Cl 2.962327 -2.384797 0.126554  
Na 1.694813 -1.016099 -1.811660  
Na 4.029986 -0.014871 0.502357  
Cl 3.331924 1.169255 -1.736236

N8f  
Na 1.927147 1.571274 0.346501  
Cl 4.306081 0.261208 0.333984  
Na 2.845709 -1.490543 1.637664  
Cl 0.817358 -0.024886 2.511555  
Na -1.210080 1.816603 2.273497  
Cl -0.055159 3.391237 0.519693  
Na -3.801213 -0.514129 -0.303336  
Cl -2.338931 -2.716535 -0.502588  
Na -1.071543 -1.788056 1.598030  
Cl -3.094634 0.049894 2.177700  
Cl 1.245067 0.844378 -2.324222  
Na -0.625830 -1.234251 -1.925216  
Cl -2.661840 0.718597 -2.316854  
Na -0.862818 2.495138 -1.823302  
Na 3.180000 -0.877097 -1.757218  
Cl 1.535288 -2.510266 -0.429434

N8g  
Cl -0.000000 0.000000 0.972928  
Na -0.000000 1.866227 3.196274

Cl -0.000000 0.000000 4.948624  
Na -0.000000 -1.866227 3.196274  
Cl -0.000000 -3.582425 1.172735  
Na -1.633307 -1.973517 -0.286049  
Cl 0.000000 -1.976153 -2.693153  
Na 1.742837 -0.000000 -3.162971  
Cl 3.302466 -0.000000 -1.091725  
Na 1.633307 -1.973517 -0.286049  
Na -1.633307 1.973517 -0.286049  
Cl 0.000000 1.976153 -2.693153  
Na -1.742837 0.000000 -3.162971  
Cl -3.302466 0.000000 -1.091725  
Cl 0.000000 3.582425 1.172735  
Na 1.633307 1.973517 -0.286049

N8h  
Cl -0.284758 0.711548 0.000000  
Na -2.447077 1.326428 1.737253  
Cl -2.744134 3.323526 0.000000  
Na -2.447077 1.326428 -1.737253  
Cl -2.447077 -1.179088 -2.419740  
Na 0.283015 -1.311054 -2.029132  
Cl 2.878013 -0.909282 -2.013274  
Na 2.876505 1.009616 0.000000  
Cl 2.878013 -0.909282 2.013274  
Na 0.283015 -1.311054 2.029132  
Cl -2.447077 -1.179088 2.419740  
Na -2.302323 -2.319015 0.000000  
Cl 0.217298 -3.242074 0.000000  
Na 2.880582 -2.602831 0.000000  
Na -0.001110 3.549720 0.000000  
Cl 2.515556 3.598409 0.000000

N8i  
Na -1.477214 -2.325128 -0.764595  
Cl -3.971488 -2.655390 -0.289909  
Na -3.722132 -0.212948 0.427338  
Cl -1.457922 0.004495 -2.255893  
Na 1.119828 0.062750 -1.810785  
Cl 1.315732 -2.439608 -0.485383  
Na 1.111664 -1.443506 2.020539  
Cl -1.329612 -0.637032 2.086428  
Na -1.085876 1.924446 1.778231  
Cl -3.361076 2.476126 0.547227  
Na -1.711618 2.473191 -1.481630  
Cl 0.711132 2.578772 -0.075560  
Na 3.198857 1.810842 0.447186  
Cl 3.488130 -0.295430 2.062980  
Cl 3.755567 0.522733 -1.811533  
Na 3.879413 -1.601406 -0.273745

N8j  
Na -3.348775 1.866841 0.000000  
Cl -3.725485 0.147208 1.994928  
Na -3.923759 -1.618668 0.000000  
Cl -3.725485 0.147208 -1.994928  
Na -1.151992 -0.529598 -1.975028  
Cl 1.439821 -0.369613 -2.212899  
Na 1.439821 2.163376 -1.680691  
Cl -0.716135 2.223583 0.000000  
Na 1.439821 2.163376 1.680691  
Cl 1.439821 -0.369613 2.212899  
Na -1.151992 -0.529598 1.975028  
Cl -1.342235 -2.416291 0.000000  
Na 1.489843 -2.300485 0.000000  
Cl 3.417863 2.558287 0.000000  
Na 3.920667 -0.103270 0.000000  
Cl 4.044190 -2.640282 0.000000

N8k  
Na -2.390311 -0.549942 -1.843983  
Cl -3.127622 2.008404 -1.144766

Na -0.674203 2.294796 -0.127702  
Cl 0.570860 1.066642 -2.168658  
Na 1.529897 -1.292366 -1.436524  
Cl -0.669545 -2.616751 -1.441941  
Na -1.400010 -2.039671 1.058518  
Cl -1.464136 0.604661 2.097634  
Na 1.102281 0.719633 2.483223  
Cl 1.873077 2.789412 1.102259  
Na 2.880091 1.830128 -1.130052  
Cl 4.191219 -0.507763 -1.220563  
Na 4.181692 -1.579478 1.085048  
Cl 1.747752 -1.749975 1.830923  
Cl -3.940810 -1.693930 0.236773  
Na -3.963394 0.770364 1.006180

#### N8l

Na -0.545324 2.242737 0.716983  
Cl -1.480350 -0.002570 1.999283  
Na 1.480744 -0.819546 -1.579222  
Cl 0.834122 1.841341 -1.648609  
Na 3.121482 1.921502 -0.285185  
Cl 2.001038 2.044364 2.073974  
Na 1.016887 -0.329721 2.561021  
Cl 1.548900 -2.399821 0.991975  
Na 4.060028 -2.195499 0.534370  
Cl 4.210734 -0.334222 -1.194303  
Cl -2.948510 2.429959 -0.563707  
Na -1.760031 -2.174362 0.179187  
Cl -4.351403 -1.977604 0.201323  
Na -3.990350 0.450014 0.890255  
Na -1.721344 0.901592 -2.330938  
Cl -0.890003 -1.599323 -2.304123

#### N8m

Cl -0.964417 1.026482 1.807505  
Na -0.563495 -1.522173 0.981018  
Cl 1.285338 -0.279665 -1.289988  
Na 0.249501 2.256537 -0.381067  
Cl 2.651128 2.666588 0.704741  
Na 1.738460 0.705008 2.269515  
Cl 1.766057 -1.961999 2.160160  
Na 3.108235 -2.149945 -0.116970  
Cl 5.246136 -1.027740 -0.948335  
Na 3.864743 1.107682 -1.053960  
Na -3.286906 1.564311 0.477614  
Cl -2.160578 -2.399635 -0.995574  
Na -4.605278 -1.937672 -0.330211  
Cl -5.432018 0.159617 0.751860  
Cl -1.986562 2.044841 -1.830892  
Na -1.131299 -0.376869 -2.401493

#### N8n

Cl -1.984366 -1.198360 0.000000

Na -1.420838 -3.162960 1.875637  
Cl -0.579467 -4.765817 0.000000  
Na -1.420838 -3.162960 -1.875637  
Cl 0.806801 -2.077839 -2.678973  
Na 0.238219 0.400718 -2.044997  
Cl -1.420838 2.448954 -1.970494  
Na -2.769724 1.323304 0.000000  
Cl -1.420838 2.448954 1.970494  
Na 0.238219 0.400718 2.044997  
Cl 0.806801 -2.077839 2.678973  
Na 1.323006 -2.617029 0.000000  
Cl 2.009264 0.521083 0.000000  
Na -0.196131 3.859987 0.000000  
Cl 2.186471 4.878922 0.000000  
Na 3.383989 2.683043 0.000000

#### N8o

Cl 1.337187 -0.159808 1.648250  
Na 2.851277 -2.310624 0.740914  
Cl 1.675651 -2.550509 -1.577974  
Na -0.649473 -1.669792 -0.833048  
Cl -2.255316 -2.151047 1.286010  
Na -1.211232 0.058499 2.337840  
Cl -2.016857 2.361521 1.380011  
Na 0.237382 2.380054 -0.057145  
Cl -0.759752 0.730933 -1.915618  
Na -3.158677 1.505878 -0.933655  
Na 3.709688 1.298834 1.268421  
Cl 4.822956 -0.734664 0.122683  
Na 2.587810 0.038575 -1.683607  
Cl 2.737671 2.631288 -0.754574  
Cl -5.348563 0.136319 -1.049244  
Na -4.665014 -1.709476 0.490074

#### N8p

Na 3.461568 0.759705 -1.010163  
Cl 4.971985 -1.344994 -0.799246  
Na 2.895665 -2.163512 0.449875  
Cl 1.112428 -0.886962 -1.441936  
Na -0.296287 1.318816 -1.551334  
Cl 1.784082 2.981902 -1.467067  
Na 1.456842 2.983384 1.118331  
Cl 2.755319 0.834428 1.865728  
Na 0.446844 -0.333500 1.958556  
Cl 0.380260 -2.925455 1.579756  
Na -0.842452 -2.446083 -0.710993  
Cl -2.778796 -0.715524 -1.423296  
Na -3.492874 0.796659 0.880472  
Cl -1.082542 1.771572 1.198804  
Cl -6.013971 0.310095 0.666256  
Na -5.373761 -0.954201 -1.411380

#### N8q

Na -0.516295 2.504296 -0.860865  
Cl 1.188919 4.444674 -0.520702  
Na 2.476864 2.496403 0.525285  
Cl 1.610218 0.653093 -1.439338  
Na -0.140081 -1.301990 -1.608681  
Cl -2.206032 0.416774 -1.854629  
Na -2.568928 -0.162350 1.392778  
Cl -0.634235 1.617274 1.775539  
Na 1.077253 -0.303676 1.902068  
Cl 3.644683 0.110517 1.600136  
Na 3.495604 -1.055073 -0.796732  
Cl 2.085790 -3.228004 -1.519266  
Na 0.960403 -4.203004 0.536657  
Cl -0.621443 -2.284773 1.170071  
Cl -5.112667 -0.507238 0.988694  
Na -4.715636 0.136357 -1.400384

#### N8r

Cl -1.542006 1.266698 0.000000  
Na -1.324191 3.880086 0.000000  
Cl -1.732812 6.467174 0.000000  
Na -1.206810 8.986201 0.000000  
Cl 1.309901 9.143194 0.000000  
Na 1.191961 6.555878 0.000000  
Cl 1.406570 3.942890 0.000000  
Na 1.206810 1.331437 0.000000  
Cl 1.542006 -1.266698 0.000000  
Na 1.324191 -3.880086 0.000000  
Cl 1.732812 -6.467174 0.000000  
Na -1.191961 -6.555878 0.000000  
Cl -1.406570 -3.942890 0.000000  
Na -1.206810 -1.331437 0.000000  
Cl -1.309901 -9.143194 0.000000  
Na 1.206810 -8.986201 0.000000

#### N8s

Cl -0.000000 -0.000000 0.485440  
Na -0.812647 -1.673322 2.863524  
Cl -0.000000 -0.000000 4.604485  
Na 0.812647 1.673322 2.863524  
Cl 1.517858 3.634449 1.272999  
Na 0.529678 2.230371 -0.798607  
Cl 0.000000 4.190670 -2.430184  
Na -1.089634 6.488032 -2.835347  
Cl -0.419643 7.920699 -0.872288  
Na 0.759181 5.783701 -0.026236  
Na -0.529678 -2.230371 -0.798607  
Cl -1.517858 -3.634449 1.272999  
Na -0.759181 -5.783701 -0.026236  
Cl -0.000000 -4.190670 -2.430184  
Na 1.089634 -6.488032 -2.835347  
Cl 0.419643 -7.920699 -0.872288

## 6.6 Structures Neutral Clusters: $\omega$ B97XD/aug-cc-pVDZ

#### N1a

Na 0.000000 0.000000 -1.458648  
Cl 0.000000 0.000000 0.943831

#### N2a

Na 0.000000 1.603431 0.000000  
Cl -0.000000 -0.000000 2.014710  
Na -0.000000 -1.603431 0.000000  
Cl 0.000000 -0.000000 -2.014710

#### N3a

Na 0.000000 2.329987 -0.000000  
Cl 2.373080 1.370099 0.000000  
Na 2.017828 -1.164993 0.000000  
Cl -2.373080 1.370099 -0.000000

Na -2.017828 -1.164993 -0.000000  
Cl -0.000000 -2.740197 0.000000

#### N3b

Na -0.000000 1.463121 0.645222  
Cl 1.837539 -0.000000 -0.924305  
Na -0.000000 -1.463121 0.645222  
Cl -1.837539 0.000000 -0.924305  
Na 0.000000 0.000000 -2.698098  
Cl -0.000000 -0.000000 2.759446

#### N4a

Na 1.223849 1.223849 1.223849  
Cl 1.438020 -1.438020 1.438020  
Na -1.223849 -1.223849 1.223849

Cl -1.438020 1.438020 1.438020  
Na -1.223849 1.223849 -1.223849  
Cl -1.438020 -1.438020 -1.438020  
Cl 1.438020 1.438020 -1.438020  
Na 1.223849 -1.223849 -1.223849

#### N4b

Cl 2.478677 2.478677 -0.000000  
Na 0.000000 3.109557 0.000000  
Cl -2.478677 2.478677 -0.000000  
Na -3.109557 0.000000 0.000000  
Cl -2.478677 -2.478677 -0.000000  
Na -0.000000 -3.109557 0.000000  
Cl 2.478677 -2.478677 -0.000000  
Na 3.109557 -0.000000 0.000000

N4c  
Na -0.144621 -1.830198 1.486917  
Cl 0.670311 -3.766265 0.000000  
Na -0.144621 -1.830198 -1.486917  
Cl -2.204848 -0.828358 0.000000  
Na -1.184889 1.587313 0.000000  
Cl 1.308761 0.208505 0.000000  
Cl -0.144621 3.974631 0.000000  
Na 2.046564 2.709017 0.000000

N4d  
Cl -0.082131 -1.790128 1.842819  
Na 0.782587 0.263778 0.000000  
Cl 2.229798 2.451978 0.000000  
Na -0.082131 3.475085 0.000000  
Cl -1.809821 1.545101 0.000000  
Na -1.950373 -1.080802 0.000000  
Cl -0.082131 -1.790128 -1.842819  
Na 0.854721 -3.302241 0.000000

N4e  
Na 0.000000 1.623045 0.386156  
Cl 0.000000 2.306852 -2.086822  
Na 0.000000 -0.000000 -3.182988  
Cl -0.000000 -2.306852 -2.086822  
Na -0.000000 -1.623045 0.386156  
Cl -1.815918 0.000000 1.720875  
Cl 1.815918 -0.000000 1.720875  
Na 0.000000 0.000000 3.541785

N4g  
Cl 0.000000 0.000000 -1.291512  
Na -0.000000 2.458494 -2.200677  
Cl -0.000000 4.032222 -0.251683  
Na -0.000000 1.926360 1.289938  
Cl -0.000000 -0.000000 2.973482  
Na -0.000000 -1.926360 1.289938  
Cl -0.000000 -4.032222 -0.251683  
Na -0.000000 -2.458494 -2.200677

N5a  
Na -0.794991 1.760894 1.773287  
Cl 1.267452 1.433350 -0.000000  
Na 1.743311 -0.896512 -1.662386  
Cl -0.794991 -0.798395 -2.444940  
Na -0.794991 1.760894 -1.773287  
Cl -2.729343 1.844788 0.000000  
Na -1.966673 -0.789758 0.000000  
Cl -0.794991 -0.798395 2.444940  
Na 1.743311 -0.896512 1.662386  
Cl 3.097189 -2.288942 -0.000000

N5b  
Na 1.150849 1.092124 1.708017  
Cl -0.536924 2.375201 0.012414  
Na 1.155381 1.117714 -1.697142  
Cl 0.504296 -1.433830 -2.001205  
Na -1.333301 -1.590314 -0.006197  
Cl 0.506943 -1.464221 1.985733  
Na 2.270100 -1.660986 -0.012472  
Cl 3.195161 0.842300 0.006931  
Cl -3.798469 -0.724829 -0.000637  
Na -3.043678 1.667958 0.002793

N5c  
Na 0.000000 0.000000 -1.431204  
Cl 0.000000 2.865271 -0.747512  
Na -1.832149 -1.832062 0.749479  
Cl 0.000000 0.000000 1.980309  
Na 1.832149 1.832062 0.749479  
Cl 2.864033 -0.000000 -0.749520

Na 1.832149 -1.832062 0.749479  
Cl -2.864033 0.000000 -0.749520  
Na -1.832149 1.832062 0.749479  
Cl -0.000000 -2.865271 -0.747512

N5d  
Na -0.107907 -1.140604 2.644940  
Cl -0.249750 -1.361911 -0.000000  
Na -0.107907 -1.140604 -2.644940  
Cl 0.046226 -1.415528 -5.236533  
Na 0.185396 1.106160 -5.161016  
Cl 0.046226 1.690940 -2.628401  
Na -0.054762 1.322387 0.000000  
Cl 0.046226 1.690940 2.628401  
Na 0.185396 1.106160 5.161016  
Cl 0.046226 -1.415528 5.236533

N5e  
Na -2.966843 -0.248587 1.485914  
Cl -0.559664 -0.903466 0.000422  
Na 2.101351 -1.114035 0.001031  
Cl 2.535341 1.683018 0.000280  
Na -0.110126 1.783065 0.000477  
Cl -2.705126 2.050264 -0.000694  
Na -2.966105 -0.250131 -1.486608  
Cl -4.548834 -1.622512 0.000188  
Na 4.963093 0.719786 -0.000652  
Cl 4.617397 -1.783251 -0.000301

N5f  
Cl 2.519767 3.468162 -0.000000  
Na -0.000000 3.918055 -0.000000  
Cl -2.519767 3.468162 -0.000000  
Na -3.726291 1.210745 -0.000000  
Cl -4.077069 -1.324720 -0.000000  
Na -2.302975 -3.169773 -0.000000  
Cl -0.000000 -4.286884 -0.000000  
Na 2.302975 -3.169773 -0.000000  
Cl 4.077069 -1.324720 -0.000000  
Na 3.726291 1.210745 -0.000000

N6a  
Cl 0.000000 -0.000000 2.152625  
Na 0.000000 1.858079 -0.000000  
Cl -2.723206 2.045019 0.000000  
Na -2.634441 0.000000 -1.698318  
Cl 0.000000 -0.000000 -2.152625  
Na 2.634441 -0.000000 -1.698318  
Cl 2.723206 2.045019 0.000000  
Na 2.634441 0.000000 1.698318  
Cl 2.723206 -2.045019 0.000000  
Na -0.000000 -1.858079 -0.000000  
Cl -2.723206 -2.045019 -0.000000  
Na -2.634441 -0.000000 1.698318

N6b  
Na -0.000000 2.511611 1.226573  
Cl -0.000000 2.757172 -1.472012  
Na 2.175119 1.255806 -1.226573  
Cl 2.387781 1.378586 1.472012  
Na 2.175119 -1.255806 1.226573  
Cl -0.000000 -2.757172 1.472012  
Na -2.175119 -1.255806 1.226573  
Cl -2.387781 1.378586 1.472012  
Na -2.175119 1.255806 -1.226573  
Cl -2.387781 -1.378586 -1.472012  
Na -0.000000 -2.511611 -1.226573  
Cl 2.387781 -1.378586 -1.472012

N6c  
Na -2.084814 1.797619 0.675686  
Cl -1.978122 0.029600 -1.670975

Na 0.026015 1.735063 -2.177696  
Cl 0.051187 3.254830 -0.068864  
Na 2.149523 1.736311 0.664445  
Cl 1.977875 -0.030057 -1.671148  
Na -0.026324 -1.735664 -2.177586  
Cl -0.051224 -3.254792 -0.068234  
Cl 3.011780 -0.041923 2.281096  
Cl -3.011315 0.042471 2.281460  
Na -2.149435 -1.736148 0.664992  
Na 2.084756 -1.797381 0.675914

N6d  
Na -1.287690 -1.580282 0.568139  
Cl 0.667473 -2.798957 -0.725168  
Na 2.424722 -1.823604 0.909831  
Cl 0.621837 -0.001420 1.933115  
Cl 3.697110 0.000406 -0.474437  
Na 2.425365 1.824169 0.913233  
Na 1.082328 0.000906 -1.523384  
Cl 0.668670 2.799166 -0.723098  
Na -1.284005 1.574470 0.568197  
Cl -3.408252 -0.000206 1.479642  
Na -4.157052 0.005781 -0.971753  
Cl -1.731563 0.000079 -1.790459

N6e  
Na -0.088455 1.411038 1.685477  
Cl 1.990496 1.897649 0.000000  
Na 1.813539 -1.360150 0.000000  
Cl -0.088455 -1.176099 1.954119  
Na -1.815687 -1.885050 0.000000  
Cl -4.395471 -1.475004 0.000000  
Na -4.146386 1.019900 0.000000  
Cl -1.944609 2.418048 0.000000  
Na -0.088455 1.411038 -1.685477  
Cl -0.088455 -1.176099 -1.954119  
Cl 4.444466 -1.512739 0.000000  
Na 4.452212 0.986146 0.000000

N6f  
Cl 0.373074 1.506822 0.000000  
Na -1.574470 0.624272 1.737415  
Cl -3.572019 0.929366 0.000000  
Na -1.574470 0.624272 -1.737415  
Cl -1.574470 -1.978900 -1.990542  
Na -3.329050 -1.759348 0.000000  
Cl -1.574470 -1.978900 1.990542  
Na 0.257732 -2.390720 0.000000  
Cl 2.818747 -2.103864 0.000000  
Na 3.281440 0.404311 0.000000  
Cl 4.221918 2.855622 0.000000  
Na 1.868157 3.686987 0.000000

N6g  
Cl 1.456597 -1.381144 -0.142159  
Na 1.247933 1.260969 -0.128477  
Cl 1.726618 3.872174 -0.023087  
Na -1.094820 4.013492 -0.005648  
Cl -1.456597 1.381144 -0.142159  
Na -1.247933 -1.260969 -0.128477  
Cl -1.726618 -3.872174 -0.023087  
Na -1.273738 -6.428573 0.142526  
Cl 1.247933 -6.615563 0.159810  
Na 1.094820 -4.013492 -0.005648  
Cl -1.247933 6.615563 0.159810  
Na 1.273738 6.428573 0.142526

N6h  
Cl 1.428889 3.912802 -0.674009  
Na 2.860247 1.903553 0.100399  
Cl 4.476790 0.000181 0.675462  
Na 2.860406 -1.903253 0.100169

Cl 1.429299 -3.912742 -0.674113  
Na -0.697197 -2.532937 -0.621633  
Cl -3.179138 -2.000064 0.323176  
Na -4.501951 -0.000131 -0.650341  
Cl -3.179272 1.999912 0.323044  
Na -0.697404 2.532640 -0.622047  
Cl 0.350645 -0.000024 0.105465  
Na -1.875248 0.000029 1.571322

#### N6j

Cl -0.000000 0.000000 -0.031896  
Na 0.106869 2.373330 -1.311585  
Cl 0.900390 4.351610 -2.799342  
Na 0.000000 5.702009 -0.853027  
Cl -0.927206 3.870390 0.757742  
Na -0.688330 1.655225 2.215672  
Cl 0.927206 -3.870390 0.757742  
Na -0.000000 -5.702009 -0.853027  
Cl -0.900390 -4.351610 -2.799342  
Na -0.106869 -2.373330 -1.311585  
Na 0.688330 -1.655225 2.215672  
Cl 0.000000 -0.000000 4.049020

#### N6k

Cl -2.141461 -0.384721 0.000000  
Na -0.437298 -2.433130 -0.000000  
Cl 0.724738 -4.710804 -0.000000  
Na 3.085372 -3.713579 -0.000000  
Cl 1.903461 -0.699574 -0.000000  
Na 0.000000 1.181138 0.000000  
Cl -1.156983 3.550010 0.000000  
Na -3.104457 5.287817 0.000000  
Cl -5.202339 3.880045 0.000000  
Na -3.507559 1.903791 0.000000  
Na 4.516732 -0.469618 -0.000000  
Cl 5.514897 -2.771462 -0.000000

#### N6l

Na -4.242320 -0.253432 1.477805  
Cl -5.796003 -1.644959 -0.022930  
Na -4.221586 -0.246627 -1.495409  
Cl -3.979716 2.043686 -0.003182  
Na -1.379709 1.805556 0.011363  
Cl 1.256698 1.656377 0.020658  
Na 3.843644 1.000526 0.008511  
Cl 3.371861 -1.779556 0.027368  
Na 0.834242 -1.020200 0.023045  
Cl -1.821856 -0.903121 0.009044  
Cl 6.444683 0.851770 -0.034503  
Na 5.976060 -1.632307 -0.019836

#### N6n

Cl -1.464784 1.810424 -0.003002  
Na -4.047369 2.072195 0.000594  
Cl -6.103316 0.580012 0.003770  
Na -5.100064 -1.781491 0.001657  
Cl -2.732645 -2.735140 -0.002258  
Na -0.968817 -0.848264 -0.003953  
Cl 1.708954 -0.615477 -0.001845  
Na 1.213739 2.150451 -0.000180  
Cl 3.613325 3.023821 0.001150  
Na 4.561608 0.624562 -0.000620  
Na 3.313178 -2.699686 0.002335  
Cl 5.643465 -1.751608 0.002294

#### N6o

Cl 2.536468 4.393291 0.000000  
Na -0.000000 4.726794 0.000000  
Cl -2.536468 4.393291 -0.000000  
Na -4.093523 2.363397 0.000000  
Cl -5.072935 0.000000 0.000000  
Na -4.093523 -2.363397 0.000000

Cl -2.536468 -4.393291 0.000000  
Na -0.000000 -4.726794 0.000000  
Cl 2.536468 -4.393291 -0.000000  
Na 4.093523 -2.363397 0.000000  
Cl 5.072935 -0.000000 0.000000  
Na 4.093523 2.363397 0.000000

#### N7a

Na -2.024234 1.168692 -1.327691  
Cl -2.015187 -1.163469 -2.646915  
Na -0.000000 -2.337384 -1.327691  
Cl 0.000000 -2.637404 1.289919  
Na -1.726618 -0.996864 2.524239  
Cl -2.284059 1.318702 1.289919  
Na 0.000000 1.993727 2.524239  
Cl 0.000000 0.000000 4.299395  
Na 1.726618 -0.996864 2.524239  
Cl 2.015187 -1.163469 -2.646915  
Na 0.000000 0.000000 -3.942637  
Cl 0.000000 -2.326937 -2.646915  
Na 2.024234 1.168692 -1.327691  
Cl 2.284059 1.318702 1.289919

#### N7b

Cl -2.242743 -1.521719 -0.000000  
Na -0.680108 -3.741655 -0.000000  
Cl 0.921948 -3.099067 2.032943  
Na -0.462631 -0.805204 1.979457  
Cl -1.381707 1.660547 2.466085  
Na -2.333766 1.237135 0.000000  
Cl -1.381707 1.660547 -2.466085  
Na 0.921948 2.735512 -1.715753  
Cl 1.316918 0.417713 0.000000  
Na 2.316353 -2.106015 -0.000000  
Cl 0.921948 -3.099067 -2.032943  
Na -0.462631 -0.805204 -1.979457  
Na 0.921948 2.735512 1.715753  
Cl 1.702269 4.466287 0.000000

#### N7c

Cl 1.618357 0.062648 -0.000000  
Na 1.739271 2.235382 1.877774  
Cl -0.670553 1.822310 2.749019  
Na -0.670553 -0.697362 2.083345  
Cl 0.039278 -3.268826 2.027933  
Na 1.630787 -2.666386 0.000000  
Cl 0.039278 -3.268826 -2.027933  
Na -1.711580 -3.286666 0.000000  
Cl -2.373355 -0.673570 0.000000  
Na -1.039362 2.169272 -0.000000  
Cl 1.359305 3.961905 -0.000000  
Na 1.739271 2.235382 -1.877774  
Cl -0.670553 1.822310 -2.749019  
Na -0.670553 -0.697362 -2.083345

#### N7d

Cl 0.318050 0.179302 1.974933  
Na 0.318050 -2.493520 1.672652  
Cl 2.364034 -2.769365 0.000000  
Na 2.331229 -0.110995 0.000000  
Cl 3.207107 2.397652 0.000000  
Na 1.182134 2.753505 1.706471  
Cl -0.602002 3.673121 0.000000  
Na 1.182134 2.753505 -1.706471  
Cl 0.318050 0.179302 -1.974933  
Na 0.318050 -2.493520 -1.672652  
Cl -1.530192 -3.538298 0.000000  
Na -1.590269 1.149983 0.000000  
Cl -4.073071 0.285349 0.000000  
Na -3.744382 -2.188056 0.000000

#### N7e

Na 1.020869 -3.102760 0.000000  
Cl -0.635528 -3.104920 2.046019  
Na -2.355095 -3.041089 0.000000  
Cl -0.635528 -3.104920 -2.046019  
Na -0.657694 -0.369286 -1.860483  
Cl -2.785181 -0.423519 0.000000  
Na -0.657694 -0.369286 1.860483  
Cl 1.629371 -0.478824 0.000000  
Na 3.962400 0.761722 0.000000  
Cl 3.697025 3.235737 0.000000  
Na 1.101694 2.766521 0.000000  
Cl -0.657694 2.303450 -2.026711  
Na -2.344580 2.225296 0.000000  
Cl -0.657694 2.303450 2.026711

#### N7h

Cl 1.546019 -2.360033 0.000000  
Na 0.797471 -1.630616 2.511474  
Cl -1.829394 -2.051720 2.401549  
Na -1.211504 -2.898921 0.000000  
Cl -1.829394 -2.051720 -2.401549  
Na 0.797471 -1.630616 -2.511474  
Cl 0.797471 0.953771 -2.223055  
Na -1.836223 0.628890 -2.005889  
Cl -2.281949 2.283666 -0.000000  
Na -1.836223 0.628890 2.005889  
Cl 0.797471 0.953771 2.223055  
Na 2.479721 0.614028 -0.000000  
Cl 3.040472 3.149488 -0.000000  
Na 0.437302 2.932635 -0.000000

#### N7i

Na 1.998664 -1.687076 0.000000  
Cl 1.605567 -1.132009 2.620127  
Na -0.789773 -2.206020 2.254677  
Cl -0.232810 -3.439519 0.000000  
Na -0.789773 -2.206020 -2.254677  
Cl 1.605567 -1.132009 -2.620127  
Na 0.329987 1.081620 -1.853154  
Cl -2.167357 0.097143 -2.279645  
Na -2.841018 1.194378 -0.000000  
Cl -2.167357 0.097143 2.279645  
Na 0.329987 1.081620 1.853154  
Cl 2.382229 1.562474 -0.000000  
Na 1.556638 3.976286 -0.000000  
Cl -0.893005 3.147797 -0.000000

#### N7j

Na -1.192981 -2.772315 -1.054019  
Cl -3.287301 -1.041197 -1.388848  
Na -0.473870 -0.524060 1.339271  
Cl -2.248841 1.586667 1.283447  
Na 0.213913 2.890787 1.315433  
Cl 1.712916 0.812110 1.918762  
Na 2.500699 1.137497 -0.880428  
Cl 0.527453 3.106218 -1.267829  
Na -1.350314 1.176210 -1.526713  
Cl -0.073301 -3.135035 1.327186  
Na 2.374231 -1.801941 0.580595  
Cl 0.473670 -0.754476 -1.419798  
Cl 4.336240 -0.725653 -0.721791  
Na -4.298423 0.127751 0.641388

#### N7k

Na 0.000000 0.000000 -0.675861  
Cl 2.110922 1.218742 -2.137976  
Na -0.000000 2.797331 -1.897950  
Cl -0.000000 2.541506 0.847377  
Na 1.803773 1.041409 2.136680  
Cl 2.201009 -1.270753 0.847377  
Na 2.422560 -1.398665 -1.897950  
Cl -0.000000 -2.437483 -2.137976

Na -2.422560 -1.398665 -1.897950  
Cl -2.110922 1.218742 -2.137976  
Cl -2.201009 -1.270753 0.847377  
Na -0.000000 -2.082817 2.136680  
Cl 0.000000 0.000000 3.845701  
Na -1.803773 1.041409 2.136680

N7l

Cl -0.000000 0.000000 1.614182  
Na 0.000000 2.629046 1.287683  
Cl 0.000000 5.259654 1.649350  
Na 0.000000 5.281159 -1.178884  
Cl 0.000000 2.631426 -1.420128  
Na 0.000000 0.000000 -1.120307  
Cl -0.000000 -2.631426 -1.420128  
Na -0.000000 -5.281159 -1.178884  
Cl 0.000000 -7.878502 -1.443925  
Na 0.000000 -7.800554 1.081300  
Cl -0.000000 -5.259654 1.649350  
Na -0.000000 -2.629046 1.287683  
Cl 0.000000 7.878502 -1.443925  
Na 0.000000 7.800554 1.081300

N7m

Cl 1.179095 0.322931 0.001271  
Na 3.131129 -1.528128 0.001271  
Cl 4.480699 -3.747902 -0.001727  
Na 6.429779 -2.124241 -0.002228  
Cl 5.254859 0.208953 0.001170  
Na -0.098289 2.962527 -0.000487  
Cl -2.547436 1.936997 0.001966  
Na -4.835841 0.557539 0.000675  
Cl -7.267537 -0.378031 -0.003524  
Na -6.076393 -2.607889 -0.001329  
Cl -3.546990 -1.975795 0.002706  
Na -1.388455 -0.462753 0.002728  
Na 3.415181 2.141409 -0.000239  
Cl 2.073885 4.319723 -0.002114

N7n

Cl 5.359661 0.000000 3.297605  
Na 4.250012 0.000000 0.993255  
Cl 2.698841 0.000000 -1.039782  
Na 0.203632 0.000000 -1.604570  
Cl -2.352598 0.000000 -1.660456  
Na -4.352501 0.000000 -0.066537  
Cl -5.992478 0.000000 1.896237  
Na -5.993128 0.000000 4.453476  
Cl -5.474937 0.000000 6.957575  
Na -3.474376 0.000000 8.550629  
Cl -1.196413 0.000000 9.713724  
Na 1.296015 0.000000 9.142480  
Cl 3.623594 0.000000 8.082280  
Na 4.731644 0.000000 5.777164

N8a

Cl 0.000000 2.121293 1.317716  
Na 0.000000 1.835879 -1.390608  
Cl -2.121293 0.000000 -1.317716  
Na -1.835879 0.000000 1.390608  
Cl -2.036487 0.000000 4.094969  
Na 0.000000 1.710953 3.966804  
Cl 2.036487 0.000000 4.094969  
Na -0.000000 -1.710953 3.966804  
Cl -0.000000 -2.121293 1.317716  
Na -0.000000 -1.835879 -1.390608  
Cl 2.121293 -0.000000 -1.317716  
Na 1.835879 -0.000000 1.390608  
Cl -0.000000 -2.036487 -4.094969  
Na 1.710953 -0.000000 -3.966804  
Cl 0.000000 2.036487 -4.094969  
Na -1.710953 0.000000 -3.966804

N8b

Na 1.617072 -0.989107 1.897277  
Cl 0.039165 -1.474937 4.042932  
Na -0.637145 1.105145 3.811522  
Cl -0.452202 -1.652288 -0.000000  
Na 1.617072 -0.989107 -1.897277  
Cl 3.531499 -0.860388 0.000000  
Na 2.931888 1.709657 0.000000  
Cl 1.148708 1.787242 1.957897  
Na -1.047070 1.281747 -0.000000  
Cl -2.726138 0.919077 -2.214781  
Na -1.924474 -1.573171 -2.273604  
Cl 0.039165 -1.474937 -4.042932  
Na -0.637145 1.105145 -3.811522  
Cl 1.148708 1.787242 -1.957897  
Cl -2.726138 0.919077 2.214781  
Na -1.924474 -1.573171 2.273604

N8d

Cl -1.013460 3.141453 2.043532  
Na -1.936413 1.574519 0.000000  
Cl -1.013460 3.141453 -2.043532  
Na 0.366347 4.026054 0.000000  
Cl 1.992927 1.857293 0.000000  
Na 3.086433 -0.569513 -0.000000  
Cl 2.215598 -1.246885 2.417653  
Na 0.588151 0.987288 2.291118  
Cl -1.763573 -0.625458 1.941798  
Na -2.707293 -2.152046 -0.000000  
Cl -1.763573 -0.625458 -1.941798  
Na 0.588151 0.987288 -2.291118  
Cl 2.215598 -1.246885 -2.417653  
Na 0.042753 -2.646094 2.017093  
Na 0.042753 -2.646094 -2.017093  
Cl -0.915921 -4.111716 -0.000000

N8e

Cl -1.476690 -2.306451 -2.139411  
Na -2.367873 -2.260692 0.319085  
Cl -3.739414 -0.512580 1.802908  
Na -1.219880 0.238139 -2.864342  
Cl 1.383472 0.398900 -2.333045  
Na 1.054309 -2.091405 -1.040651  
Cl -0.000365 -2.133527 1.631475  
Na -1.424985 -0.463557 3.104876  
Cl -0.327507 1.706766 2.067687  
Na -2.705409 1.725987 0.772236  
Cl -1.885043 2.477294 -1.595298  
Na 0.665772 2.446985 -0.525832  
Cl 3.143699 2.289350 0.526241  
Na 2.003265 0.012802 1.531703  
Na 3.861852 0.483710 -1.231178  
Cl 3.489139 -1.757712 0.067910

N8f

Na 2.002788 1.512130 0.041997  
Cl 4.351928 0.099087 0.010311  
Na 2.947376 -1.341423 1.700234  
Cl 1.064991 0.349614 2.490867  
Na -0.928138 2.165524 2.141553  
Cl 0.127076 3.466234 0.087488  
Na -3.877258 -0.512711 -0.016041  
Cl -2.491973 -2.755378 -0.082798  
Na -0.908697 -1.515536 1.690306  
Cl -2.847153 0.401600 2.255463  
Cl 1.079263 0.477336 -2.471799  
Na -0.898868 -1.410742 -1.763744  
Cl -2.834609 0.537899 -2.226797  
Na -0.910847 2.289443 -2.045856  
Na 2.950324 -1.256901 -1.754845  
Cl 1.306743 -2.530958 -0.058598

N8g

Cl 0.000000 -0.000000 0.972325  
Na 0.000000 1.847659 3.150629  
Cl 0.000000 -0.000000 4.943452  
Na -0.000000 -1.847659 3.150629  
Cl -0.000000 -3.603895 1.149310  
Na -1.624281 -1.973314 -0.291552  
Cl -0.000000 -1.979909 -2.661003  
Na 1.750515 -0.000000 -3.142377  
Cl 3.324223 -0.000000 -1.074232  
Na 1.624281 -1.973314 -0.291552  
Na -1.624281 1.973314 -0.291552  
Cl 0.000000 1.979909 -2.661003  
Na -1.750515 0.000000 -3.142377  
Cl -3.324223 0.000000 -1.074232  
Cl 0.000000 3.603895 1.149310  
Na 1.624281 1.973314 -0.291552

N8h

Cl -0.249930 0.723020 0.000000  
Na -2.405519 1.231352 1.710275  
Cl -2.850934 3.233751 0.000000  
Na -2.405519 1.231352 -1.710275  
Cl -2.405519 -1.286461 -2.402673  
Na 0.309264 -1.336724 -1.982462  
Cl 2.886664 -0.785941 -2.030856  
Na 2.747266 1.110243 0.000000  
Cl 2.886664 -0.785941 2.030856  
Na 0.309264 -1.336724 1.982462  
Cl -2.405519 -1.286461 2.402673  
Na -2.248574 -2.466432 0.000000  
Cl 0.331751 -3.266554 0.000000  
Na 2.969448 -2.455138 0.000000  
Na -0.149789 3.604343 0.000000  
Cl 2.372457 3.724880 0.000000

N8j

Na -3.427316 1.889956 0.000000  
Cl -3.731289 0.195566 2.010805  
Na -3.919373 -1.564407 0.000000  
Cl -3.731289 0.195566 -2.010805  
Na -1.118724 -0.387757 -1.811285  
Cl 1.506188 -0.394569 -2.108325  
Na 1.506188 2.175616 -1.691013  
Cl -0.718649 2.105706 0.000000  
Na 1.506188 2.175616 1.691013  
Cl 1.506188 -0.394569 2.108325  
Na -1.118724 -0.387757 1.811285  
Cl -1.363511 -2.405887 0.000000  
Na 1.450965 -2.442187 0.000000  
Cl 3.450851 2.595516 0.000000  
Na 3.671674 -0.171263 0.000000  
Cl 4.019180 -2.730624 0.000000

N8l

Na -0.803580 2.340364 -0.208570  
Cl -1.470367 0.733210 2.063317  
Na 1.597943 -1.424767 -1.207438  
Cl 0.408410 0.809375 -2.101307  
Na 2.719342 1.818907 -1.280952  
Cl 1.735134 3.031698 0.855726  
Na 1.110722 0.976072 2.353699  
Cl 1.771865 -1.559184 1.819008  
Na 4.263001 -1.508524 1.142521  
Cl 4.201066 -0.440058 -1.182704  
Cl -3.217741 1.909485 -1.271239  
Na -1.273547 -1.991117 1.175415  
Cl -3.815036 -1.792706 0.314961  
Na -3.962028 0.706634 0.927476  
Na -2.206167 -0.671772 -1.731880  
Cl -0.548775 -2.850864 -1.254996

N8m  
Cl -0.960346 0.873677 1.852868  
Na -0.364528 -1.526331 0.736625  
Cl 1.282835 -0.290957 -1.305237  
Na 0.231345 2.193404 -0.241657  
Cl 2.625174 2.620375 0.873573  
Na 1.726904 0.598050 2.383073  
Cl 1.870846 -2.063786 2.098164  
Na 3.252957 -2.116200 -0.161126  
Cl 5.309161 -0.903945 -1.083844  
Na 3.809422 1.163857 -0.993240  
Na -3.276762 1.383349 0.449131  
Cl -2.276702 -2.220743 -1.057745  
Na -4.745951 -1.986475 -0.235170  
Cl -5.558041 0.174350 0.753763  
Cl -1.954080 2.156648 -1.779504  
Na -1.157058 -0.243794 -2.481692

N8n  
Cl -1.908668 -1.088077 -0.000000  
Na -1.425954 -3.183145 1.887408  
Cl -0.587981 -4.748861 0.000000  
Na -1.425954 -3.183145 -1.887408  
Cl 0.778345 -2.095586 -2.729080  
Na 0.027168 0.319772 -2.013518  
Cl -1.425954 2.524787 -2.002986  
Na -2.779316 1.508248 -0.000000  
Cl -1.425954 2.524787 2.002986  
Na 0.027168 0.319772 2.013518  
Cl 0.778345 -2.095586 2.729080  
Na 1.217702 -2.470456 0.000000  
Cl 1.849528 0.542719 0.000000  
Na 0.051762 3.661007 -0.000000  
Cl 2.427394 4.762427 0.000000  
Na 3.557795 2.523188 0.000000

N8o  
Cl 1.283711 -0.135349 1.577533  
Na 2.967293 -2.327465 0.747306  
Cl 1.687535 -2.683175 -1.479813  
Na -0.535369 -1.685827 -0.558250  
Cl -2.385130 -2.066762 1.394024

Na -1.289067 0.141990 2.406575  
Cl -2.046232 2.408233 1.343234  
Na 0.274126 2.285194 0.015916  
Cl -0.620425 0.616694 -1.888563  
Na -3.056875 1.437458 -0.994208  
Na 3.724848 1.345828 1.194452  
Cl 4.829373 -0.680566 0.048439  
Na 2.431449 0.010140 -1.602945  
Cl 2.723780 2.675223 -0.794892  
Cl -5.315370 0.167620 -1.229271  
Na -4.759416 -1.673918 0.381907

N8p  
Na 3.343614 0.958627 -1.046556  
Cl 5.022555 -1.046230 -0.981694  
Na 3.137857 -1.892285 0.572500  
Cl 1.109167 -0.793962 -1.326465  
Na -0.494232 1.307548 -1.410247  
Cl 1.538652 3.069602 -1.407609  
Na 1.314990 2.940959 1.197987  
Cl 2.736007 0.799011 1.807558  
Na 0.419683 -0.429010 1.537115  
Cl 0.715794 -3.063693 1.550720  
Na -0.558466 -2.725206 -0.732042  
Cl -2.662130 -0.942114 -1.140709  
Na -3.626833 0.705429 0.982663  
Cl -1.198160 1.754769 1.286608  
Cl -6.131292 0.354122 0.442525  
Na -5.283893 -1.069296 -1.458316

N8q  
Na -0.535737 2.468826 -0.931514  
Cl 1.143784 4.447685 -0.655987  
Na 2.223996 2.567059 0.763840  
Cl 1.537856 0.605159 -1.354783  
Na -0.092487 -1.465145 -1.594176  
Cl -2.251437 0.279653 -1.732196  
Na -2.520373 -0.109587 1.226000  
Cl -0.527785 1.649244 1.743609  
Na 1.093109 -0.365271 1.419734  
Cl 3.654707 0.244462 1.635987  
Na 3.652125 -0.870596 -0.780602  
Cl 2.262925 -3.149114 -1.351431

Na 1.038176 -4.237756 0.613917  
Cl -0.709252 -2.368585 1.023386  
Cl -5.130968 -0.432766 1.099292  
Na -4.827637 0.040875 -1.347556

N8r  
Cl -9.222112 1.319629 0.145469  
Na -9.090332 -1.204851 0.128716  
Cl -6.540248 -1.715513 0.011814  
Na -6.622071 1.108060 0.028321  
Cl -3.981825 1.414783 -0.062727  
Na -3.918360 -1.289686 -0.060812  
Cl -1.279887 -1.552989 -0.090725  
Na -1.343204 1.168872 -0.085423  
Cl 1.280074 1.552650 -0.094513  
Na 1.343519 -1.169288 -0.092368  
Cl 3.982292 -1.414866 -0.077025  
Na 3.918575 1.289473 -0.070133  
Cl 6.540294 1.715609 0.005350  
Na 6.622243 -1.107844 0.021782  
Cl 9.221374 -1.319297 0.156113  
Na 9.089688 1.205254 0.139569

N8s  
Cl 0.000000 0.000000 0.874945  
Na -0.000168 -1.814604 3.185406  
Cl 0.000000 0.000000 4.989570  
Na 0.000168 1.814604 3.185406  
Cl 0.000145 3.990921 1.661062  
Na 0.001382 2.345900 -0.427349  
Cl 0.000726 4.122882 -2.379190  
Na 0.000347 6.463671 -3.528292  
Cl -0.000000 8.102615 -1.606062  
Na 0.000326 5.930789 -0.169505  
Na -0.001382 -2.345900 -0.427349  
Cl -0.000145 -3.990921 1.661062  
Na -0.000326 -5.930789 -0.169505  
Cl -0.000726 -4.122882 -2.379190  
Na -0.000347 -6.463671 -3.528292  
Cl -0.000000 -8.102615 -1.606062
